# Supplementary material for: Ranking REACH registered neutral, ionizable and ionic organic chemicals based on their aquatic persistency and mobility
Source: Royal Society of Chemistry journal article supplement (doi:10.1039/c7em00158d), 2017-01-01
Supplement: c7em00158d2.xlsx [file c7em00158d2.xlsx]

## Sheet: PMOC_scoring&information
Compound Information							PMOC-scoring information															Mobility Information								QSAR	QSAR	QSAR	QSAR			QSAR	QSAR	QSAR	QSAR	Persistency Information									Other hazard / emerging chemical classification
CAS number(s) of (p) parents (s) salts or mixtures (h) hydrolysis reactants	canonical SMILES	Name of chemical, if any available	Source type	MW (g/mol)	Compound class	Ionization type (pH 4 - 10)	PMOC-score Ground water	PMOC-score Surface water	PMOC score std.dev.	PMOC score based exclusively on experimental data?	M-score	M-score std.dev.	M-score (basis)	PG-score	PG-score Basis	PS-score	PS-score Basis	P-score std. dev.	IFS QSAR	IFS QSAR	IFS QSAR	Acid/Base	pKa1	pKa1 Basis	Min. log Koc/Doc	Min. log Koc/Doc basis	Min. log Kow/Dow basis	Min. log Kow/Dow std.dev.	Min. log Kow/Dow basis	Just QSAR Min. log Kow/Dow M-score	Just QSAR Min. log Kow/Dow average	Just QSAR Min. log Kow/Dow std.dev.	Just QSAR Min. log Kow/Dow n of QSARs	Max SL (mg/L)	Max. SL basis	Just QSAR Max. SL M-score	Just QSAR Max. SL average	Just QSAR Max. SL rsd	Just QSAR Max. SL n of QSARs	Biodegradation P-score	Biodegradation P-score basis	Hydrolysis P-score	Hydrolysis P-score basis	Photolysis P-score	Vapour pressure (Pa)	Vapour pressure (298 K) basis	Kaw (-)	Kaw basis	REACH SVHC Description
			(parent chemical, salt or mixture component, hydrolysis product, or combination)		organics, pseudo-organics, organo-silanes & -boranes & -metallics	(neutral; ionizable; single_cation;multiple_cation;single_anion;multiple_anion;zwitterion)			(propogated error of P-score and M-score, unless one was predicted by the IFS QSAR)	("exp" if yes)		(from all experimental and estimated M-scores where data was available)	(1. Koc/Doc > Swater > Kow/Dow 2. OECD & lit Exp & PP-LFER > EPISuite exp > QSAR)	groundwater	B=biodegradation; H=hydrolysis; (priority: OECD exp> exp>QSAR)	Surface water	B=biodegradation; H=hydrolysis; PT=phototransform.; V=volatilization; (priority: OECD exp> exp>QSAR)	from Biowin output/Arnot et al. 2005	M-Score IFS QSAR	P(G)-Score IFS QSAR	P(S)-Score IFS QSAR	N = neutral B = base amph = amphoteric A = acid	Most acidic proton;A = pKa B = pKBH+	pKa	(pH 4 - 10)		(pH 4 - 10)	If predicted by multiple QSARs/experimental data	Basis					(pH 4 - 10)	Basis			rsd = relative standard deviation	(inclues EPISUITE WATERNT & WSKOW; SPARC at 12 & 25°C, Insights Molecular Solubility & ADMET predictors, Chemaxon, ADMET)		Priority: 1. experimental half-life, 2. QSAR - Biowin & Arnot et. al. (2005) (geometric avg. + one std. dev.))		1. Experimental; 2. QSAR (Hydrowin or LHC)	Based on experimental REACH dossier data	(298 K)	Priority: 1. OECD exp. 2. Lit exp. 3. EPIwin Exp. 4. QSAR	(298 K)	Priority: 1. OECD exp. 2. Lit exp & PP-LFER 3. EPIwin Exp. 4. QSAR	Description
p50-00-0,h74-95-3,h74-97-5,h75-09-2,h109-87-5,h110-88-3,h111-91-1,h143-29-3,h462-95-3,h505-65-7,h646-06-0,h2568-90-3,h4431-83-8,h5187-23-5,h22174-70-5,h58567-11-6,h66492-51-1,h89281-73-2,h365411-50-3	C=O	formaldehyde	hydrolysis_product,parent_chemical	30.0264	organic	neutral	Unstable MOC	Unstable MOC	0.57735	exp	4	0.57735	Doc (OECD & lit exp.)	1	B(exp)	1	B(exp)	0	(M4-5)	(P1-2)	(P1-2)	N	N	-	1.202	OECD exp.	-0.328073	0.491126	Avg. QSAR	5	-0.328073	0.491126	5	400000	EPI exp.	5	170848	0.654814	8	1	B(exp)	-	-	-	518100	OECD exp.	1.27141e-05	OECD exp.
p50-03-3	CC(=O)OCC(=O)[C@@]1(O)CC[C@@H]2[C@]1(C)C[C@H](O)[C@H]1[C@H]2CCC2=CC(=O)CC[C@]12C	hydrocortisone 21-acetate	parent_chemical	404.507	organic	neutral	Transient	Transient	0.57735	exp	2	0.57735	Swater (EPI exp.)	1	B(exp)	1	B(exp)	0	(M2-3)	(P1-2)	(P3-4)	N	N	-	-	-	2		OECD exp	4	1.90745	0.279157	5	14.1	EPI exp.	3	296.64	1.67633	8	1	B(exp)	3	Hydrowin	-	0.001	OECD exp.	1.27591e-10	QSAR avg.
p50-21-5,p79-33-4,p10326-41-7,h78-97-7,h95-96-5,h535-13-7,h687-47-8,h4511-42-6,h6283-86-9,h13076-17-0,h17392-83-5,h17639-93-9,h27871-49-4,h35123-06-9,h53651-69-7,h61597-98-6,h77501-63-4,h83261-15-8,h186817-80-1	OC(=O)C(O)C	lactic acid:l-(+)-lactic acid:(R)-lactic acid	hydrolysis_product,parent_chemical	90.0793	organic	ionizable	Unstable MOC	Unstable MOC	0		5	0	Doc (OECD & lit exp.)	1	B(QSAR)	1	B(QSAR)	0	(M4-5)	(P1-2)	(P1-2)	A	3.861	Exp (Liao et al (2009))	-4.819	OECD exp.	-2.24459	1.34325	Avg. QSAR	5	-4.70019	2.44057	5	1000000	EPI exp.	5	7.57292e+11	0.920921	8	1	B(QSAR)	-	-	-	10.8506	EPIwin Exp.	3.32473e-06	EPI exp.
p50-23-7	OCC(=O)[C@@]1(O)CC[C@@H]2[C@]1(C)C[C@H](O)[C@H]1[C@H]2CCC2=CC(=O)CC[C@]12C	hydrocortisone	parent_chemical	362.469	organic	neutral	Transient	Transient	0.707107	exp	3	0.707107	Swater (EPI exp.)	1	B(exp)	1	B(exp)	0	(M2-3)	(P1-2)	(P3-4)	N	N	-	-	-	1.48053	0.233567	Avg. QSAR	4	1.48053	0.233567	5	320	EPI exp.	3	385.786	1.00842	8	1	B(exp)	-	-	-	8.23879e-12	QSAR avg.	1.17981e-06	QSAR avg.
p50-24-8	OCC(=O)[C@@]1(O)CC[C@@H]2[C@]1(C)C[C@H](O)[C@H]1[C@H]2CCC2=CC(=O)C=C[C@]12C	prednisolone	parent_chemical	360.453	organic	neutral	4	4	0.912871		3	0.57735	Swater (EPI exp.)	4	B(QSAR)	4	B(QSAR) V(QSAR avg.)	0.707107	(M2-3)	(P3-4)	(P3-4)	N	N	-	-	-	1.6		OECD exp	4	1.43258	0.299758	5	223	EPI exp.	3	347.055	1.22504	8	4	B(QSAR)	-	-	-	4.63532e-12	QSAR avg.	5.54122e-07	QSAR avg.
p50-28-2	Oc1ccc2c(c1)CC[C@@H]1[C@@H]2CC[C@]2([C@H]1CC[C@@H]2O)C	estradiol	parent_chemical	272.39	organic	ionizable	Transient	Transient	0	exp	2	0	Swater (EPI exp.)	1	B(exp)	1	B(exp)	0	(M2-3)	(P1-2)	(P3-4)	A	10.71	Exp (Liao et al (2009))	-	-	3.87884	0.312401	Avg. QSAR	2	3.84789	0.278871	5	3.9	EPI exp.	2	35.0468	0.997234	8	1	B(exp)	-	-	-	1.34728e-07	QSAR avg.	5.39052e-10	QSAR avg.
p50-45-3	OC(=O)c1cccc(c1Cl)Cl	2,3-dichlorobenzoic acid	parent_chemical	191.014	organic	ionizable	5	5	1.41421		5	0	Swater (Avg. QSAR)	4	B(QSAR)	4	B(QSAR) V(QSAR avg.)	1.41421	(M4-5)	(P3-4)	(P3-4)	A	2.67498	QSAR (SPARC)	-	-	1.27183	1.90934	Avg. QSAR	5	-1.65818	2.43847	5	3.76509e+09	QSAR avg	5	3.76509e+09	0.836152	8	4	B(QSAR)	-	-	-	0.0303924	EPIwin Exp.	2.29749e-06	QSAR avg.
p50-48-6	CN(CCC=C1c2ccccc2CCc2c1cccc2)C	amitriptyline	parent_chemical	277.412	organic	ionizable	5	5	0		5	0	Doc (PP-LFER)	4	B(QSAR)	4	B(QSAR) V(Lit exp.)	0	(M1)	(P3-4)	(P3-4)	B	9.4	Exp (CRC)	-1.305	PP-LFER	3.16136	2.19938	Avg. QSAR	5	1.00136	1.38903	5	9.71	EPI exp.	5	172449	0.938218	8	4	B(QSAR)	-	-	-	3.96954e-05	QSAR avg.	1.77828e-07	Lit exp.
p50-78-2	CC(=O)Oc1ccccc1C(=O)O	O-acetylsalicylic acid	parent_chemical	180.161	organic	ionizable	Unstable MOC	Unstable MOC	0.447214		5	0.447214	Doc (PP-LFER)	1	B(QSAR) H(OECD exp.)	1	B(QSAR) H(OECD exp.)	0	(M4-5)	(P1-2)	(P1-2)	A	3.49	Exp (OECD)	-5.74594	PP-LFER	-5.32		OECD exp	5	-2.89479	2.29106	5	1.48853e+10	OECD exp.	5	1.20399e+10	1.05614	8	1	B(QSAR)	1	OECD exp.	-	0.0033516	OECD exp.	5.29821e-08	OECD exp.
p50-89-5	OC[C@H]1O[C@H](C[C@@H]1O)n1cc(C)c(=O)[nH]c1=O	thymidine	parent_chemical	242.233	organic	ionizable	3	3	0.707107		5	0	Swater (Avg. QSAR)	2	B(QSAR)	2	B(QSAR)	0.707107	(M4-5)	(P1-2)	(P1-2)	A	10.3568	QSAR (avg.)	-	-	-1.42743	0.642545	Avg. QSAR	5	-1.467	0.579682	4	407410	QSAR avg	5	407410	1.26513	6	2	B(QSAR)	-	-	-	1.81288e-11	QSAR avg.	4.94825e-16	QSAR avg.
p51-03-6	CCCCOCCOCCOCc1cc2OCOc2cc1CCC	2-(2-butoxyethoxy)ethyl 6-propylpiperonyl ether	parent_chemical	338.447	organic	neutral	4	Transient	1.5	exp	2	0.5	Swater (OECD & lit exp.)	4	B(QSAR) H(OECD exp.)	1	PT(exp.)	1.41421	(M2-3)	(P3-4)	(P3-4)	N	N	-	-	-	4.8		OECD exp	2	3.98041	0.217324	5	36.1	OECD exp.	2	39.8921	1.63498	8	4	B(QSAR)	4	OECD exp.	1	0.00015665	OECD exp.	5.92772e-07	OECD exp.
p51-21-8	Fc1c[nH]c(=O)[nH]c1=O	fluorouracil	parent_chemical	130.079	organic	ionizable	3	3	0.707107		5	0	Swater (EPI exp.)	2	B(QSAR)	2	B(QSAR)	0.707107	(M4-5)	(P1-2)	(P1-2)	A	7.41621	QSAR (avg.)	-	-	-1.45492	0.779933	Avg. QSAR	5	-2.10115	1.08045	4	11100	EPI exp.	5	1.04297e+07	1.50459	6	2	B(QSAR)	-	-	-	9.49096e-06	QSAR avg.	6.78851e-09	QSAR avg.
p51-28-5,h97-00-7	O=N(=O)c1ccc(c(c1)N(=O)=O)O	2,4-dinitrophenol	hydrolysis_product,parent_chemical	184.109	organic	ionizable	5	5	0	exp	5	0	Doc (OECD & lit exp.)	4	B(exp)	4	B(exp) V(EPI exp.)	0	(M2-3)	(P3-4)	(P3-4)	A	4.09	Exp (OECD)	-3.351	OECD exp.	-4.24		lit exp.	5	-1.5436	2.25167	5	2790	EPI exp.	5	9.46085e+08	1.00137	8	4	B(exp)	-	-	-	0.051987	EPIwin Exp.	3.51694e-06	EPI exp.
p51-34-3,s114-49-8	OCC(c1ccccc1)C(=O)OC1CC2N(C(C1)C1C2O1)C	hyoscine:hyoscine hydrobromide	parent_chemical,salt_or_mixture_component	303.36	organic	ionizable	3	3	0		5	0	Swater (Avg. QSAR)	2	B(QSAR) H(LHC QSAR)	2	B(QSAR) H(LHC QSAR)	0	(M2-3)	(P3-4)	(P3-4)	B	7.23136	QSAR (SPARC)	-	-	-0.247182	1.33703	Avg. QSAR	5	-1.53983	0.930793	5	2.48784e+07	QSAR avg	5	2.48784e+07	1.3265	8	2	B(QSAR)	2	LHC QSAR	-	1.57851e-06	QSAR avg.	2.41212e-12	QSAR avg.
p51-80-9	CN(CN(C)C)C	N,N,N',N'-tetramethylmethylenediamine	parent_chemical	102.18	organic	ionizable	5	3	0.707107		5	0	Swater (Avg. QSAR)	4	B(QSAR)	2	V(QSAR avg.)	0.707107	(M2-3)	(P3-4)	(P3-4)	B	8.28554	QSAR (SPARC)	-	-	-1.87628	1.70346	Avg. QSAR	5	-3.5905	0.910068	5	2.31388e+10	QSAR avg	5	2.31388e+10	1.68711	8	4	B(QSAR)	-	-	-	6849.6	QSAR avg.	0.00013014	QSAR avg.
p52-51-7	OCC(N(=O)=O)(CO)Br	bronopol	parent_chemical	199.994	organic	ionizable	Unstable MOC	Unstable MOC	0	exp	5	0	Swater (OECD & lit exp.)	1	B(exp) H(OECD exp.)	1	B(exp) H(OECD exp.) PT(exp.)	0	(M4-5)	(P3-4)	(P3-4)	A	9.56	Exp (OECD)	-	-	-0.914521		OECD exp	5	-0.607915	0.639644	5	1.68565e+06	OECD exp.	5	814418	1.62295	8	1	B(exp)	1	OECD exp.	1	0.01	OECD exp.	1.79782e-09	OECD exp.
p52-90-4	[O-]C(=O)[C@@H]([NH3+])CS	L-cysteine	parent_chemical	121.159	organic	zwitterion	Unstable MOC	Unstable MOC	0		5	0	Swater (Avg. QSAR)	1	B(QSAR)	1	B(QSAR)	0	(M4-5)	(P3-4)	(P1-2)	amph	amphoprotic	-	-	-	-3.38911	0.783145	Avg. QSAR	5	-3.38911	0.783145	5	4.29398e+06	QSAR avg	5	4.29398e+06	2.15788	6	1	B(QSAR)	-	-	-	477.9	QSAR avg.	1.00396e-16	QSAR avg.
p53-16-7	Oc1ccc2c(c1)CC[C@@H]1[C@@H]2CC[C@]2([C@H]1CCC2=O)C	estrone	parent_chemical	270.374	organic	ionizable	4	4	0.912871		2	0.57735	Swater (EPI exp.)	4	B(QSAR)	4	B(QSAR) V(QSAR avg.)	0.707107	(M2-3)	(P1-2)	(P3-4)	A	10.34	Exp (Liao et al (2009))	-	-	2.43651		OECD exp	2	3.79431	0.376013	5	30	EPI exp.	2	46.9011	1.58274	8	4	B(QSAR)	-	-	-	0.001	OECD exp.	8.03638e-09	QSAR avg.
p53-43-0	O[C@H]1CC[C@]2(C(=CC[C@@H]3[C@@H]2CC[C@]2([C@H]3CCC2=O)C)C1)C	prasterone	parent_chemical	288.433	organic	neutral	Transient	Transient	0.57735	exp	2	0.57735	Swater (OECD & lit exp.)	1	B(exp)	1	B(exp)	0	(M2-3)	(P1-2)	(P1-2)	N	N	-	-	-	3.28818	0.176585	Avg. QSAR	2	3.28818	0.176585	5	17.5	OECD exp.	3	110.527	1.36918	8	1	B(exp)	-	-	-	0.01	OECD exp.	6.65243e-05	OECD exp.
p53-84-9	OC1C(COP(=O)(OP(=O)(OCC2OC(C(C2O)O)n2cnc3c2ncnc3N)O)[O-])OC(C1O)[n+]1cccc(c1)C(=O)N	nadide	parent_chemical	664.442	organic	zwitterion	Unstable MOC	Unstable MOC	0		5	0	Swater (Avg. QSAR)	1	B(exp) H(LHC QSAR)	1	B(exp) H(LHC QSAR)	0	(M4-5)	(P3-4)	(P3-4)	amph	amphoprotic	-	-	-	-6.79347	3.30474	Avg. QSAR	5	-6.79347	3.30474	4	1.27279e+06	QSAR avg	5	1.27279e+06	1.7064	6	1	B(exp)	1	LHC QSAR	-	0.0042	OECD exp.	-	-
p53-86-1,h75302-98-6	COc1ccc2c(c1)c(CC(=O)O)c(n2C(=O)c1ccc(cc1)Cl)C	indometacin	hydrolysis_product,parent_chemical	357.796	organic	ionizable	4	4	1.58114		2	1.41421	Swater (EPI exp.)	4	B(QSAR)	4	B(QSAR) V(QSAR avg.)	0.707107	(M2-3)	(P3-4)	(P3-4)	amph	amphoprotic	-	-	-	2.43023	2.04078	Avg. QSAR	3	2.43023	2.04078	5	0.937	EPI exp.	5	40483.3	2.5928	8	4	B(QSAR)	-	-	-	3.41993e-08	QSAR avg.	2.92502e-12	QSAR avg.
p55-56-1	N=C(NC(=N)Nc1ccc(cc1)Cl)NCCCCCCNC(=N)NC(=N)Nc1ccc(cc1)Cl	chlorhexidine	parent_chemical	505.456	organic	ionizable	4	4	1.41421	exp	3	1.41421	Swater (EPI exp.)	4	B(QSAR) H(OECD exp.)	4	B(QSAR) V(QSAR avg.) H(OECD exp.)	0	(M2-3)	(P3-4)	(P3-4)	amph	amphoprotic	-	-	-	2.37597	4.65001	Avg. QSAR	3	2.37597	4.65001	5	800	EPI exp.	5	10383.6	2.09261	8	4	B(QSAR)	4	OECD exp.	-	7.93704e-13	QSAR avg.	3.1729e-15	QSAR avg.
p55-63-0	O=N(=O)OC(CON(=O)=O)CON(=O)=O	glycerol trinitrate	parent_chemical	227.088	organic	neutral	4.5	4.5	1.58114		4	0.707107	Swater (EPI exp.)	4	B(QSAR)	4	B(QSAR) V(EPI exp.)	1.41421	(M2-3)	(P3-4)	(P3-4)	N	N	-	-	-	2.34732	1.98211	Avg. QSAR	3	2.34732	1.98211	5	1380	EPI exp.	4	7939.62	2.17365	8	4	B(QSAR)	-	-	-	0.24	OECD exp.	3.54147e-06	EPI exp.
p56-18-8	NCCCNCCCN	3,3'-iminodi(propylamine)	parent_chemical	131.222	organic	ionizable	Unstable MOC	Unstable MOC	0.5	exp	4	0.5	Doc (OECD & lit exp.)	1	B(exp)	1	B(exp)	0	(M2-3)	(P1-2)	(P1-2)	B	polyprotic	-	1.09825	OECD exp.	-4.96		OECD exp	5	-4.63103	3.81918	5	1.73578e+07	QSAR avg	5	1.73578e+07	2.31854	8	1	B(exp)	-	-	-	6.86822	QSAR avg.	1.41716e-11	QSAR avg.
p56-23-5	ClC(Cl)(Cl)Cl	carbon tetrachloride	parent_chemical	153.823	pseudo-organic	neutral	4.5	Unstable MOC	0.5		4	0.5	Doc (OECD & lit exp.)	4	B(QSAR)	1	V(OECD exp.)	0	(M2-3)	(P3-4)	(P1-2)	N	N	-	1.925	OECD exp.	2.76333	0.11547	lit exp.	3	2.89286	0.438313	5	846.1	OECD exp.	3	618.88	0.878912	8	4	B(QSAR)	-	-	-	15200	OECD exp.	1.0817	OECD exp.
p56-35-9	CCCC[Sn](O[Sn](CCCC)(CCCC)CCCC)(CCCC)CCCC	bis(tributyltin) oxide	parent_chemical	596.076	organo_metallic	neutral	Immobile POC	Immobile POC	2.12132		1	0	Swater (Avg. QSAR)	4	B(QSAR)	4	B(QSAR) V(EPI exp.)	2.12132	(M1)	(P3-4)	(P3-4)	N	N	-	-	-	8.6885	3.49741	Avg. QSAR	1	8.6885	3.49741	4	0.130638	QSAR avg	1	0.130638	2.11745	6	4	B(QSAR)	-	-	-	0.00099975	EPIwin Exp.	1.23502e-05	EPI exp.
p56-40-6	[O-]C(=O)C[NH3+]	glycine	parent_chemical	75.0675	organic	zwitterion	Unstable MOC	Unstable MOC	0		5	0	Swater (Avg. QSAR)	1	B(QSAR)	1	B(QSAR)	0	(M4-5)	(P3-4)	(P3-4)	amph	amphoprotic	-	-	-	-4.17785	0.794289	Avg. QSAR	5	-4.17785	0.794289	5	1.55902e+07	QSAR avg	5	1.55902e+07	2.35925	6	1	B(QSAR)	-	-	-	2837.49	QSAR avg.	2.12652e-15	QSAR avg.
p56-41-7	[O-]C(=O)[C@@H]([NH3+])C	L-alanine	parent_chemical	89.0946	organic	zwitterion	Unstable MOC	Unstable MOC	0		5	0	Swater (OECD & lit exp.)	1	B(QSAR)	1	B(QSAR)	0	(M4-5)	(P3-4)	(P1-2)	amph	amphoprotic	-	-	-	-2.85		OECD exp	5	-3.70476	0.656227	5	166500	OECD exp.	5	5.38102e+06	2.25932	6	1	B(QSAR)	-	-	-	4628.34	QSAR avg.	2.82173e-15	QSAR avg.
p56-45-1	[O-]C(=O)[C@@H]([NH3+])CO	L-serine	parent_chemical	105.094	organic	zwitterion	Unstable MOC	Unstable MOC	0		5	0	Swater (Avg. QSAR)	1	B(exp)	1	B(exp)	0	(M4-5)	(P3-4)	(P1-2)	amph	amphoprotic	-	-	-	-3.07		OECD exp	5	-4.77002	1.00269	5	5.54388e+07	QSAR avg	5	5.54388e+07	2.41326	6	1	B(exp)	-	-	-	431.69	QSAR avg.	1.03463e-19	QSAR avg.
p56-81-5,s100402-60-6,h96-12-8,h96-18-4,h96-23-1,h96-24-2,h102-76-1,h106-89-8,h106-91-2,h106-92-3,h122-32-7,h142-18-7,h555-43-1,h556-52-5,h620-67-7,h931-40-8,h2425-79-8,h2461-15-6,h5660-53-7,h6284-43-1,h7195-44-0,h7237-83-4,h7360-38-5,h10305-38-1,h10305-41-6,h13674-87-8,h16096-31-4,h25791-96-2,h26761-45-5,h26942-95-0,h30618-84-9,h31566-31-1,h49553-76-6,h52408-42-1,h52561-72-5,h56554-53-1,h57090-4…	OCC(CO)O	glycerol:d-Glucose, ether with glycerol	hydrolysis_product,parent_chemical,salt_or_mixture_component	92.0953	organic	neutral	Unstable MOC	Unstable MOC	0		5	0	Swater (EPI exp.)	1	B(QSAR)	1	B(QSAR)	0	(M4-5)	(P1-2)	(P1-2)	N	N	-	-	-	-1.8568	0.406741	Avg. QSAR	5	-1.8568	0.406741	5	1000000	EPI exp.	5	3.97374e+06	1.92405	8	1	B(QSAR)	-	-	-	0.0223944	EPIwin Exp.	7.07477e-07	EPI exp.
p56-84-8,p617-45-8	OC(=O)CC(C(=O)O)N	aspartic acid:acid D,L-aspart	parent_chemical	133.104	organic	ionizable	Unstable MOC	Unstable MOC	0.57735	exp	4	0.57735	Swater (OECD & lit exp.)	1	B(exp)	1	B(exp)	0	(M4-5)	(P1-2)	(P1-2)	amph	amphoprotic	-	-	-	-4.52261	2.22797	Avg. QSAR	5	-4.52261	2.22797	5	5000	OECD exp.	5	4.69018e+06	2.366	8	1	B(exp)	-	-	-	0.000468432	QSAR avg.	1.87667e-10	QSAR avg.
p56-86-0,h13115-71-4,h39537-23-0,h43170-88-3,h144978-12-1,h486455-65-6,h908145-87-9	OC(=O)CCC(C(=O)O)N	glutamic acid	hydrolysis_product,parent_chemical	147.132	organic	ionizable	Unstable MOC	Unstable MOC	0	exp	5	0	Swater (EPI exp.)	1	B(exp)	1	B(exp)	0	(M4-5)	(P1-2)	(P1-2)	amph	amphoprotic	-	-	-	-4.30754	2.13224	Avg. QSAR	5	-4.30754	2.13224	5	15000	EPI exp.	5	5.97032e+06	2.4902	8	1	B(exp)	-	-	-	2.2661e-06	EPIwin Exp.	5.69858e-12	QSAR avg.
p56-89-3	NC(C(=O)O)CSSCC(C(=O)O)N	cystine	parent_chemical	240.301	organic	ionizable	Transient	Transient	1.1547	exp	3	1.1547	Swater (OECD & lit exp.)	1	B(exp)	1	B(exp)	0	(M4-5)	(P1-2)	(P1-2)	amph	amphoprotic	-	-	-	-4.24176	3.10354	Avg. QSAR	5	-4.24176	3.10354	5	122	OECD exp.	5	315038	1.28258	8	1	B(exp)	-	-	-	2.43827e-08	QSAR avg.	4.5263e-13	QSAR avg.
p57-00-1	[O-]C(=O)CN(C(=[NH2+])N)C	N-amidinosarcosine	parent_chemical	131.135	organic	zwitterion	Unstable MOC	Unstable MOC	0		5	0	Swater (Avg. QSAR)	1	B(QSAR)	1	B(QSAR)	0	(M4-5)	(P3-4)	(P3-4)	amph	amphoprotic	-	-	-	-4.48158	2.69522	Avg. QSAR	5	-4.48158	2.69522	5	3.82142e+06	QSAR avg	5	3.82142e+06	2.08101	6	1	B(QSAR)	-	-	-	30.2283	QSAR avg.	2.61726e-20	QSAR avg.
p57-10-3,h79-81-2,h112-39-0,h112-67-4,h142-91-6,h624-03-3,h2441-41-0,h16260-09-6,h26266-57-9,h29806-73-3,h41672-81-5,h72576-80-8,h101541-04-2,h117827-06-2	CCCCCCCCCCCCCCCC(=O)O	palmitic acid	hydrolysis_product,parent_chemical	256.431	organic	ionizable	Unstable MOC	Unstable MOC	1.1547		5	1.1547	Doc (PP-LFER)	1	B(QSAR)	1	B(QSAR) V(EPI exp.)	0	(M2-3)	(P1-2)	(P1-2)	A	4.7332	QSAR (SPARC)	-0.0787978	PP-LFER	1.9032		lit exp.	3	2.90161	1.34677	5	0.04	EPI exp.	5	148295	2.504	8	1	B(QSAR)	-	-	-	5.054e-05	OECD exp.	0.000817892	EPI exp.
p57-11-4,h111-57-9,h112-61-8,h112-76-5,h124-26-5,h555-43-1,h627-83-8,h1338-41-6,h7651-02-7,h22047-49-0,h26658-19-5,h31566-31-1	CCCCCCCCCCCCCCCCCC(=O)O	stearic acid	hydrolysis_product,parent_chemical	284.486	organic	ionizable	Unstable MOC	Unstable MOC	1.73205		5	1.73205	Doc (PP-LFER)	1	B(exp)	1	B(exp)	0	(M2-3)	(P1-2)	(P1-2)	A	4.7332	QSAR (SPARC)	0.769282	PP-LFER	2.9632		lit exp.	2	3.82309	1.30867	5	0.597	EPI exp.	5	39561.7	2.57891	8	1	B(exp)	-	-	-	9.62426e-05	EPIwin Exp.	1.94658e-05	EPI exp.
p57-13-6,s4861-19-2,s19082-42-9,h62-56-6,h74-79-3,h76-75-5,h93-69-6,h5637-42-3	NC(=O)N	urea:urea phosphate:urea sulphate	hydrolysis_product,parent_chemical,salt_or_mixture_component	60.0558	pseudo-organic	neutral	Unstable MOC	Unstable MOC	0	exp	5	0	Swater (EPI exp.)	1	B(exp)	1	B(exp)	0	(M4-5)	(P1-2)	(P1-2)	N	N	-	-	-	-2.11		lit exp.	5	-1.61079	0.50057	5	545000	EPI exp.	5	441478	1.02975	8	1	B(exp)	-	-	-	0.001596	OECD exp.	7.11566e-11	EPI exp.
p57-14-7	CN(N)C	N,N-dimethylhydrazine	parent_chemical	60.0994	organic	ionizable	5	5	1.41421		5	0	Swater (EPI exp.)	3	B(QSAR)	3	B(QSAR)	1.41421	(M4-5)	(P1-2)	(P1-2)	B	7.61532	QSAR (SPARC)	-	-	-4.01542		OECD exp	5	-3.42229	1.461	5	1000000	EPI exp.	5	3.49068e+09	1.39268	8	3	B(QSAR)	-	-	-	20296.7	OECD exp.	3.49938e-06	QSAR avg.
p57-55-6,s85204-10-0,h75-56-9,h78-87-5,h107-98-2,h108-32-7,h108-65-6,h623-84-7,h1569-01-3,h1569-02-4,h5131-66-8,h9051-49-4,h13674-84-5,h15448-47-2,h16088-62-3,h20566-35-2,h24800-44-0,h25265-71-8,h25322-69-4,h25584-83-2,h25723-16-4,h25791-96-2,h26316-40-5,h29911-27-1,h29911-28-2,h30374-35-7,h37353-75-6,h42978-66-5,h52408-84-1,h54839-24-6,h55934-93-5,h57472-68-1,h68603-75-8,h958872-63-4	OCC(O)C	propane-1,2-diol:2-Butenedioic acid (Z)-, ester with 1,2-propanediol, compd. with 2-(dibutylamino)ethanol	hydrolysis_product,parent_chemical,salt_or_mixture_component	76.0959	organic	neutral	Unstable MOC	Unstable MOC	0	exp	5	0	Doc (OECD & lit exp.)	1	B(exp) H(OECD exp.)	1	B(exp) H(OECD exp.)	0	(M4-5)	(P1-2)	(P1-2)	N	N	-	0.46	OECD exp.	-1.07		OECD exp	5	-0.843746	0.232978	5	1000000	EPI exp.	5	826668	0.549584	8	1	B(exp)	1	OECD exp.	-	20	OECD exp.	5.27541e-07	EPI exp.
p57-57-8	C1COC1=O	propiolactone	parent_chemical	72.064	organic	neutral	Unstable MOC	Unstable MOC	0		5	0	Swater (OECD & lit exp.)	1	B(QSAR) H(LHC QSAR)	1	B(QSAR) H(LHC QSAR)	0	(M4-5)	(P1-2)	(P1-2)	N	N	-	-	-	-0.560131	0.515219	Avg. QSAR	5	-0.560131	0.515219	5	370000	OECD exp.	5	264486	1.06377	8	1	B(QSAR)	1	LHC QSAR	-	452.2	OECD exp.	3.55485e-05	OECD exp.
p57-83-0	O=C1CC[C@]2(C(=C1)CC[C@@H]1[C@@H]2CC[C@]2([C@H]1CC[C@@H]2C(=O)C)C)C	progesterone	parent_chemical	314.471	organic	neutral	4	4	0		2	0	Swater (OECD & lit exp.)	4	B(QSAR)	4	B(QSAR) V(QSAR avg.)	0	(M2-3)	(P1-2)	(P1-2)	N	N	-	-	-	3.95946	0.210362	Avg. QSAR	2	3.95946	0.210362	5	15.45	OECD exp.	2	5.36477	0.929922	8	4	B(QSAR)	-	-	-	0.000180271	QSAR avg.	1.33105e-06	QSAR avg.
p57-88-5	CC(CCC[C@H]([C@H]1CC[C@@H]2[C@]1(C)CC[C@H]1[C@H]2CC=C2[C@]1(C)CC[C@@H](C2)O)C)C	cholesterol	parent_chemical	386.666	organic	neutral	Immobile POC	Transient	0		1	0	Swater (EPI exp.)	4	B(QSAR)	1	V(QSAR avg.)	0	(M1)	(P3-4)	(P1-2)	N	N	-	-	-	8.21326	0.897498	Avg. QSAR	1	8.21326	0.897498	5	0.095	EPI exp.	1	0.00882078	2.06903	8	4	B(QSAR)	-	-	-	1.19339e-05	QSAR avg.	0.00341657	QSAR avg.
p58-08-2	Cn1cnc2c1c(=O)n(C)c(=O)n2C	caffeine	parent_chemical	194.194	organic	neutral	Unstable MOC	Unstable MOC	0	exp	5	0	Doc (OECD & lit exp.)	1	B(exp)	1	B(exp)	0	(M4-5)	(P3-4)	(P1-2)	N	N	-	1	OECD exp.	-0.161477	0.291386	Avg. QSAR	5	-0.161477	0.291386	4	22000	OECD exp.	5	19905.3	0.977955	6	1	B(exp)	-	-	-	9.77089e-07	QSAR avg.	3.46737e-10	Lit exp.
p58-22-0	O=C1CC[C@]2(C(=C1)CC[C@@H]1[C@@H]2CC[C@]2([C@H]1CC[C@@H]2O)C)C	testosterone	parent_chemical	288.433	organic	neutral	4	4	0.912871		2	0.57735	Swater (EPI exp.)	4	B(QSAR)	4	B(QSAR) V(QSAR avg.)	0.707107	(M2-3)	(P1-2)	(P1-2)	N	N	-	-	-	2.84		OECD exp	2	3.42586	0.136488	5	23.4	EPI exp.	2	33.1069	0.74866	8	4	B(QSAR)	-	-	-	0.001	OECD exp.	7.24128e-08	QSAR avg.
p58-55-9	Cn1c(=O)n(C)c2c(c1=O)nc[nH]2	theophylline	parent_chemical	180.167	organic	ionizable	Unstable MOC	Unstable MOC	0	exp	5	0	Doc (OECD & lit exp.)	1	B(exp)	1	B(exp)	0	(M4-5)	(P3-4)	(P1-2)	amph	amphoprotic	-	1	OECD exp.	-0.736736	0.328171	Avg. QSAR	5	-0.736736	0.328171	4	7360	EPI exp.	5	40389.6	1.87478	6	1	B(exp)	-	-	-	7.42481e-08	QSAR avg.	6.8703e-11	QSAR avg.
p58-73-1	CN(CCOC(c1ccccc1)c1ccccc1)C	diphenhydramine	parent_chemical	255.362	organic	ionizable	4.5	4.5	0		4	0	Swater (EPI exp.)	4	B(QSAR)	4	B(QSAR) V(QSAR avg.)	0	(M2-3)	(P3-4)	(P3-4)	B	8.64641	QSAR (SPARC)	-	-	1.7835	1.67736	Avg. QSAR	5	-0.0750711	1.2727	5	3060	EPI exp.	5	7.0043e+06	1.33313	8	4	B(QSAR)	-	-	-	0.0090849	QSAR avg.	8.41883e-07	QSAR avg.
p58-86-6	OC1COC(C(C1O)O)O	xylose	parent_chemical	150.132	organic	neutral	Unstable MOC	Unstable MOC	0		5	0	Swater (OECD & lit exp.)	1	B(QSAR)	1	B(QSAR)	0	(M4-5)	(P1-2)	(P1-2)	N	N	-	-	-	-2.80675	1.00648	Avg. QSAR	5	-2.80675	1.00648	5	568000	OECD exp.	5	3.14806e+06	1.70691	8	1	B(QSAR)	-	-	-	1.6218e-05	QSAR avg.	2.72647e-12	QSAR avg.
p59-42-7	CNCC(c1cccc(c1)O)O	phenylephrine	parent_chemical	167.209	organic	ionizable	Unstable MOC	Unstable MOC	0		5	0	Swater (Avg. QSAR)	1	B(QSAR)	1	B(QSAR)	0	(M4-5)	(P1-2)	(P1-2)	amph	amphoprotic	-	-	-	-1.21905	1.09314	Avg. QSAR	5	-1.21905	1.09314	5	1.13438e+06	QSAR avg	5	1.13438e+06	1.75982	8	1	B(QSAR)	-	-	-	0.00148729	QSAR avg.	3.46038e-12	QSAR avg.
p59-50-7	Oc1ccc(c(c1)C)Cl	chlorocresol	parent_chemical	142.586	organic	ionizable	2	Unstable MOC	0.547723		4	0.547723	Doc (PP-LFER)	2	B(QSAR)	1	V(OECD exp.)	0	(M4-5)	(P3-4)	(P3-4)	A	9.34582	Exp (OECD (log))	1.34025	PP-LFER	-0.264152		OECD exp	4	2.02401	0.221019	5	22040	OECD exp.	5	15174.3	0.929176	8	2	B(QSAR)	-	-	-	33.25	OECD exp.	0.00047839	OECD exp.
p59-67-6,h98-92-0,h100-54-9	OC(=O)c1cccnc1	nicotinic acid	hydrolysis_product,parent_chemical	123.112	organic	ionizable	Unstable MOC	Unstable MOC	0		5	0	Doc (PP-LFER)	1	B(exp)	1	B(exp)	0	(M4-5)	(P1-2)	(P1-2)	amph	amphoprotic	-	0.02026	PP-LFER	-1.03123	1.50109	Avg. QSAR	5	-1.03123	1.50109	5	18000	EPI exp.	5	789977	2.53227	8	1	B(exp)	-	-	-	0.0146543	QSAR avg.	1.58889e-08	PP-LFER
p60-00-4,h5766-67-6	OC(=O)CN(CC(=O)O)CCN(CC(=O)O)CC(=O)O	edetic acid	hydrolysis_product,parent_chemical	292.247	organic	ionizable	1	1	0.707107		3	0	Swater (EPI exp.)	2	B(QSAR)	2	B(QSAR)	0.707107	(M4-5)	(P3-4)	(P3-4)	amph	amphoprotic	-	-	-	-7.1798	5.6977	Avg. QSAR	5	-7.1798	5.6977	5	1000	EPI exp.	5	1.25689e+07	2.55033	8	2	B(QSAR)	-	-	-	1.9995e-10	EPIwin Exp.	2.35962e-14	EPI exp.
p60-09-3	Nc1ccc(cc1)N=Nc1ccccc1	4-aminoazobenzene	parent_chemical	197.241	organic	ionizable	4	4	0.57735		3	0.57735	Doc (OECD & lit exp.)	4	B(QSAR)	4	B(QSAR) V(QSAR avg.)	0	(M2-3)	(P3-4)	(P1-2)	B	2.885	Exp (OECD (average))	2.69089	OECD exp.	3.35762	0.1335	Avg. QSAR	2	3.34477	0.15022	5	32	EPI exp.	3	74.3183	1.27276	8	4	B(QSAR)	-	-	-	0.0002	OECD exp.	2.00113e-07	QSAR avg.
p60-12-8,h102-20-5,h103-45-7,h3558-60-9,h99842-68-9,h160583-22-2	OCCc1ccccc1	2-phenylethanol	hydrolysis_product,parent_chemical	122.168	organic	neutral	Unstable MOC	Unstable MOC	0.547723	exp	4	0.547723	Doc (OECD & lit exp.)	1	B(exp)	1	B(exp)	0	(M2-3)	(P1-2)	(P1-2)	N	N	-	1.5	OECD exp.	0.8		OECD exp	4	1.55337	0.0883323	5	20000	OECD exp.	5	10035.5	0.636162	8	1	B(exp)	-	-	-	11.4	Lit. Exp.	1.04713e-05	Lit exp.
p60-24-2	OCCS	2-mercaptoethanol	parent_chemical	78.1334	organic	ionizable	Unstable MOC	Unstable MOC	0		5	0	Doc (OECD & lit exp.)	1	B(QSAR)	1	B(QSAR)	0	(M4-5)	(P1-2)	(P1-2)	A	9.645	Exp (OECD (average))	-0.391836	OECD exp.	-0.24683	0.194213	Avg. QSAR	5	-0.452364	0.369027	5	3.26464e+06	OECD exp.	5	1.00084e+06	1.06383	8	1	B(QSAR)	-	-	-	234	OECD exp.	7.37949e-06	OECD exp.
p60-29-7,s109-63-7	CCOCC	diethyl ether:diethyl ether--boron trifluoride	parent_chemical,salt_or_mixture_component	74.1235	organic	neutral	3	Unstable MOC	0.707107		5	0	Doc (PP-LFER)	2	B(QSAR)	1	V(OECD exp.)	0.707107	(M4-5)	(P1-2)	(P1-2)	N	N	-	0.25928	PP-LFER	0.89	0	lit exp.	5	0.913462	0.151258	5	64900	OECD exp.	5	40500.6	0.514331	8	2	B(QSAR)	-	-	-	71600	OECD exp.	0.0330064	OECD exp.
p60-34-4	CNN	methylhydrazine	parent_chemical	46.0723	organic	ionizable	5	5	1.41421		5	0	Swater (EPI exp.)	3	B(QSAR)	3	B(QSAR)	1.41421	(M4-5)	(P1-2)	(P1-2)	B	7.74667	Exp (OECD (average))	-	-	-3.77674		OECD exp	5	-3.75546	1.71904	5	1000000	EPI exp.	5	4.00786e+09	1.27525	8	3	B(QSAR)	4	OECD exp.	-	6658	OECD exp.	8.7983e-07	QSAR avg.
p60-80-0	O=c1cc(n(n1c1ccccc1)C)C	phenazone	parent_chemical	188.231	organic	neutral	5	5	0.707107		5	0	Swater (EPI exp.)	3	B(QSAR)	3	B(QSAR)	0.707107	(M2-3)	(P1-2)	(P1-2)	N	N	-	-	-	0.903799	0.363311	Avg. QSAR	5	0.903799	0.363311	4	100000	EPI exp.	5	77845.5	2.11765	6	3	B(QSAR)	-	-	-	0.0371907	QSAR avg.	2.71949e-08	QSAR avg.
p61-54-1	NCCc1c[nH]c2c1cccc2	2-(indol-3-yl)ethylamine	parent_chemical	160.22	organic	ionizable	3	3	0		5	0	Swater (Avg. QSAR)	2	B(QSAR)	2	B(QSAR)	0	(M4-5)	(P3-4)	(P3-4)	amph	amphoprotic	-	-	-	-0.0732798	1.31862	Avg. QSAR	5	-0.0732798	1.31862	5	54543.4	QSAR avg	5	54543.4	1.53604	8	2	B(QSAR)	-	-	-	0.0051927	QSAR avg.	3.06485e-09	QSAR avg.
p61-90-5	[NH3+][C@H](C(=O)[O-])CC(C)C	L-leucine	parent_chemical	131.176	organic	zwitterion	3	3	0.707107		5	0	Swater (Avg. QSAR)	2	B(QSAR)	2	B(QSAR)	0.707107	(M4-5)	(P3-4)	(P1-2)	amph	amphoprotic	-	-	-	-2.49047	0.514034	Avg. QSAR	5	-2.49047	0.514034	5	714878	QSAR avg	5	714878	1.6756	6	2	B(QSAR)	-	-	-	463.106	QSAR avg.	6.62493e-15	QSAR avg.
p62-23-7,h16397-70-9,h93839-21-5,h140391-39-5	OC(=O)c1ccc(cc1)N(=O)=O	4-nitrobenzoic acid	hydrolysis_product,parent_chemical	167.122	organic	ionizable	1	1	0		3	0	Swater (EPI exp.)	2	B(QSAR)	2	B(QSAR)	0	(M4-5)	(P1-2)	(P1-2)	A	3.44	Exp (OECD)	-	-	-4.67	0	lit exp.	5	-2.57569	2.27496	5	200	EPI exp.	5	3.71483e+09	0.958762	8	2	B(QSAR)	-	-	-	0.00145327	QSAR avg.	2.77037e-08	QSAR avg.
p62-53-3,h92-77-3,h102-01-2,h102-06-7,h102-08-9,h103-71-9,h120-35-4,h941-69-5,h2210-24-4,h2512-29-0,h5280-68-2,h6041-94-7,h6358-85-6,h6448-95-9,h12225-06-8,h13909-63-2,h67990-05-0,h68227-78-1,h125971-57-5,h125971-95-1,h215917-77-4,h1112262-71-1	Nc1ccccc1	aniline	hydrolysis_product,parent_chemical	93.1291	organic	ionizable	Unstable MOC	Unstable MOC	0	exp	5	0	Doc (OECD & lit exp.)	1	B(exp)	1	B(exp)	0	(M2-3)	(P3-4)	(P3-4)	B	4.41	Exp (OECD (average))	0.977284	OECD exp.	0.367284	0.0282843	lit exp.	5	0.557862	0.280631	5	36000	EPI exp.	5	67090	0.756113	8	1	B(exp)	-	-	-	65	OECD exp.	8.27423e-05	OECD exp.
p62-55-5	CC(=N)S	thioacetamide	parent_chemical	75.1327	organic	ionizable	3	Unstable MOC	0.707107		5	0	Swater (Avg. QSAR)	2	B(QSAR)	1	V(QSAR avg.)	0.707107	(M4-5)	(P3-4)	(P1-2)	amph	amphoprotic	-	-	-	0.388002	0.869298	Avg. QSAR	5	0.388002	0.869298	5	376106	QSAR avg	5	376106	1.8585	8	2	B(QSAR)	-	-	-	685.026	QSAR avg.	0.00212866	QSAR avg.
p62-56-6,h76-75-5	NC(=S)N	thiourea	hydrolysis_product,parent_chemical	76.1204	pseudo-organic	ionizable	3	3	0.707107	exp	5	0	Swater (EPI exp.)	2	B(exp)	2	B(exp)	0.707107	(M4-5)	(P3-4)	(P3-4)	amph	amphoprotic	-	-	-	-1.0984	0.766092	Avg. QSAR	5	-1.0984	0.766092	5	142000	EPI exp.	5	170836	1.09742	8	2	B(exp)	4	LHC QSAR	-	0.37324	EPIwin Exp.	8.09714e-08	EPI exp.
p63-05-8	O=C1CC[C@]2(C(=C1)CC[C@@H]1[C@@H]2CC[C@]2([C@H]1CCC2=O)C)C	androst-4-ene-3,17-dione	parent_chemical	286.417	organic	neutral	Transient	Transient	0.57735	exp	3	0.57735	Swater (OECD & lit exp.)	1	B(exp)	1	B(exp)	0	(M2-3)	(P1-2)	(P1-2)	N	N	-	-	-	3.34317	0.436999	Avg. QSAR	2	3.34317	0.436999	5	66	OECD exp.	2	34.0422	0.978843	8	1	B(exp)	4	OECD exp.	-	2e-06	OECD exp.	3.50315e-09	OECD exp.
p64-04-0,h1943-82-4	NCCc1ccccc1	phenethylamine	hydrolysis_product,parent_chemical	121.183	organic	ionizable	3	3	0.707107		5	0	Swater (Avg. QSAR)	2	B(QSAR)	2	B(QSAR)	0.707107	(M2-3)	(P1-2)	(P1-2)	B	9.83	Exp (CRC)	-	-	0.0226511	1.49473	Avg. QSAR	5	-2.30935	2.02738	5	1.3082e+10	QSAR avg	5	1.3082e+10	1.42801	8	2	B(QSAR)	-	-	-	45.7361	QSAR avg.	2.15353e-05	QSAR avg.
p64-17-5,s3087-36-3,h60-29-7,h64-67-5,h74-96-4,h75-00-3,h76-72-2,h77-83-8,h77-93-0,h78-10-4,h78-40-0,h84-66-2,h87-13-8,h89-33-8,h94-05-3,h95-92-1,h97-63-2,h101-97-3,h105-39-5,h105-53-3,h105-56-6,h105-58-8,h110-76-9,h110-80-5,h111-90-0,h112-15-2,h112-36-7,h112-50-5,h120-47-8,h122-51-0,h140-88-5,h141-05-9,h141-78-6,h141-97-9,h298-06-6,h372-31-6,h383-63-1,h454-31-9,h462-95-3,h515-84-4,h533-68-6,h535…	CCO	ethanol:titanium(4+) ethanolate	hydrolysis_product,parent_chemical,salt_or_mixture_component	46.0694	organic	neutral	Unstable MOC	Unstable MOC	0		5	0	Doc (PP-LFER)	1	B(exp)	1	B(exp) V(Lit exp.)	0	(M4-5)	(P1-2)	(P1-2)	N	N	-	-0.8095	PP-LFER	-0.286667	0.0321455	lit exp.	5	-0.172538	0.112449	5	1000000	EPI exp.	5	407335	0.594638	8	1	B(exp)	4	OECD exp.	-	7886.9	OECD exp.	0.000213796	Lit exp.
p64-18-6,h53-84-9,h67-66-3,h68-12-2,h75-12-7,h76-03-9,h95-16-9,h123-39-7,h288-32-4,h288-88-0,h616-47-7,h761-65-9,h822-36-6,h1072-63-5,h3034-38-6,h4394-85-8,h4637-24-5,h5036-48-6,h5922-69-0,h13162-05-5,h21732-17-2,h23996-53-4,h24155-42-8,h25953-19-9,h27394-99-6,h36635-56-0,h38083-17-9,h38585-74-9,h64987-06-0,h86404-63-9,h89182-60-5,h91273-04-0,h115241-16-2,h120128-90-7,h122584-18-3,h124172-53-8,h1…	OC=O	formic acid	hydrolysis_product,parent_chemical	46.0258	organic	ionizable	Unstable MOC	Unstable MOC	0	exp	5	0	Doc (OECD & lit exp.)	1	B(exp)	1	B(exp)	0	(M4-5)	(P1-2)	(P1-2)	A	3.7	Exp (OECD)	-5.05	OECD exp.	-6.84		lit exp.	5	-4.02445	3.06875	5	1000000	EPI exp.	5	6.81228e+11	1.29538	8	1	B(exp)	-	-	-	5678.58	EPIwin Exp.	7.6688e-06	OECD exp.
p64-19-7,s373-61-5,s7585-20-8,s39430-51-8,h50-03-3,h50-78-2,h70-51-9,h71-55-6,h75-05-8,h75-36-5,h77-90-7,h79-04-9,h79-07-2,h79-16-3,h79-20-9,h79-21-0,h79-36-7,h80-26-2,h89-48-5,h90-17-5,h92-55-7,h93-92-5,h96-32-2,h96-34-4,h102-76-1,h103-09-3,h103-45-7,h103-90-2,h105-39-5,h105-87-3,h108-05-4,h108-21-4,h108-22-5,h108-24-7,h108-65-6,h109-60-4,h110-19-0,h111-21-7,h111-55-7,h112-07-2,h112-15-2,h115-95…	CC(=O)O	acetic acid:dihydrogen bis(acetato-O)difluoroborate(1-):zirconium acetate:Acetic acid, chromium salt, basic	hydrolysis_product,parent_chemical,salt_or_mixture_component	60.0529	organic	ionizable	Unstable MOC	Unstable MOC	0		5	0	Doc (PP-LFER)	1	B(QSAR)	1	B(QSAR)	0	(M4-5)	(P1-2)	(P1-2)	A	4.74	Exp (OECD)	-6.1332	PP-LFER	-5.45334	0.0404145	lit exp.	5	-3.91611	1.80991	5	1.0971e+11	OECD exp.	5	4.82405e+10	1.07463	8	1	B(QSAR)	-	-	-	2079	OECD exp.	8.35828e-05	OECD exp.
p64-67-5	CCOS(=O)(=O)OCC	diethyl sulphate	parent_chemical	154.186	organic	neutral	Unstable MOC	Unstable MOC	0		4	0	Swater (EPI exp.)	1	H(LHC QSAR)	1	H(LHC QSAR)	0	(M4-5)	(P3-4)	(P3-4)	N	N	-	-	-	0.80081	0.589384	Avg. QSAR	5	0.80081	0.589384	5	7000	EPI exp.	5	24558.1	0.920382	8	2	B(QSAR)	1	LHC QSAR	-	28.196	OECD exp.	0.000251093	EPI exp.
p64-86-8	COc1c(OC)cc2c(c1OC)c1ccc(c(=O)cc1[C@H](CC2)NC(=O)C)OC	colchicine	parent_chemical	399.447	organic	neutral	5	5	1.58114		5	0.707107	Swater (EPI exp.)	4	B(QSAR)	4	B(QSAR) V(QSAR avg.)	1.41421	(M4-5)	(P3-4)	(P3-4)	N	N	-	-	-	1.60863	0.434343	Avg. QSAR	4	1.60863	0.434343	4	45000	EPI exp.	3	84.0294	1.06353	6	4	B(QSAR)	-	-	-	4.23894e-09	QSAR avg.	7.32014e-16	QSAR avg.
p65-45-2,h611-20-1	NC(=O)c1ccccc1O	salicylamide	hydrolysis_product,parent_chemical	137.139	organic	ionizable	Unstable MOC	Unstable MOC	0		5	0	Doc (PP-LFER)	1	B(exp)	1	B(exp)	0	(M4-5)	(P1-2)	(P1-2)	amph	amphoprotic	-	0.89212	PP-LFER	1.28		lit exp.	5	0.158808	0.622863	5	59600	OECD exp.	5	182556	1.55631	8	1	B(exp)	-	-	-	0.002	OECD exp.	1.85746e-09	OECD exp.
p65-85-0,h93-58-3,h94-36-0,h98-07-7,h98-88-4,h100-47-0,h120-00-3,h120-51-4,h120-55-8,h135-57-9,h613-92-3,h614-45-9,h936-49-2,h947-19-3,h959-14-8,h2743-38-6,h5444-75-7,h17637-11-5,h27138-31-4,h31560-20-0,h54761-87-4,h68411-27-8,h120807-02-5,h139122-17-1,h141818-73-7,h165670-57-5,h924726-92-1	OC(=O)c1ccccc1	benzoic acid	hydrolysis_product,parent_chemical	122.124	organic	ionizable	Unstable MOC	Unstable MOC	0		5	0	Doc (PP-LFER)	1	B(exp)	1	B(exp)	0	(M4-5)	(P1-2)	(P1-2)	A	4.207	Exp (Liao et al (2009))	-4.60562	PP-LFER	-3.923	0	lit exp.	5	-2.31398	1.75601	5	3400	EPI exp.	5	1.40584e+09	0.846098	8	1	B(exp)	-	-	-	0.0936	OECD exp.	1.55809e-06	EPI exp.
p66-25-1	CCCCCC=O	hexanal	parent_chemical	100.162	organic	neutral	Unstable MOC	Unstable MOC	0.57735		5	0.57735	Doc (PP-LFER)	1	B(QSAR)	1	B(QSAR) V(Lit exp.)	0	(M2-3)	(P1-2)	(P1-2)	N	N	-	0.85678	PP-LFER	1.78		lit exp.	4	1.77408	0.12213	5	5640	EPI exp.	4	4758.56	0.438622	8	1	B(QSAR)	-	-	-	1480	Lit. Exp.	0.00870964	Lit exp.
p67-43-6	OC(=O)CN(CCN(CC(=O)O)CC(=O)O)CCN(CC(=O)O)CC(=O)O	N-carboxymethyliminobis(ethylenenitrilo)tetra(acetic acid)	parent_chemical	393.353	organic	ionizable	4.5	4.5	1.41421		4	0	Swater (EPI exp.)	3	B(QSAR)	3	B(QSAR)	1.41421	(M4-5)	(P3-4)	(P3-4)	amph	amphoprotic	-	-	-	-8.75681	7.21247	Avg. QSAR	5	-8.75681	7.21247	5	4800	EPI exp.	5	2.03201e+07	2.54456	8	3	B(QSAR)	-	-	-	8.06517e-15	QSAR avg.	3.0706e-26	QSAR avg.
p67-51-6	Cc1[nH]nc(c1)C	3,5-dimethylpyrazole	parent_chemical	96.1327	organic	ionizable	Transient	Transient	2		1	2	Doc (OECD & lit exp.)	1	B(QSAR)	1	B(QSAR)	0	(M4-5)	(P1-2)	(P1-2)	amph	amphoprotic	-	5.1	OECD exp.	0.883964	0.374881	Avg. QSAR	5	0.883964	0.374881	5	29000	OECD exp.	5	48436.4	1.16119	8	1	B(QSAR)	4	OECD exp.	-	0.7	OECD exp.	9.3658e-07	OECD exp.
p67-52-7	O=C1CC(=O)NC(=O)N1	barbituric acid	parent_chemical	128.088	organic	ionizable	Transient	Transient	0	exp	1	0	Swater (EPI exp.)	1	B(exp)	1	B(exp)	0	(M4-5)	(P1-2)	(P1-2)	A	4.04	Exp (OECD (average))	-	-	-2.30802	2.14199	Avg. QSAR	5	-4.69202	3.08557	5	0.019	EPI exp.	5	2.61627e+11	1.53674	8	1	B(exp)	-	-	-	1.9998e-06	OECD exp.	2.26771e-10	QSAR avg.
p67-56-1,h74-83-9,h74-87-3,h74-88-4,h76-89-1,h77-76-9,h77-78-1,h79-20-9,h79-22-1,h80-62-6,h93-58-3,h94-60-0,h96-32-2,h96-33-3,h96-34-4,h97-52-9,h97-97-2,h99-75-2,h99-76-3,h101-41-7,h103-26-4,h105-34-0,h105-45-3,h106-65-0,h106-70-7,h106-79-6,h107-98-2,h108-59-8,h108-65-6,h109-86-4,h109-87-5,h110-42-9,h110-71-4,h111-11-5,h111-77-3,h111-81-9,h111-82-0,h111-96-6,h112-35-6,h112-39-0,h112-49-2,h112-61-…	CO	methanol	hydrolysis_product,parent_chemical	32.0424	organic	neutral	Unstable MOC	Unstable MOC	0		5	0	Doc (PP-LFER)	1	B(QSAR)	1	B(QSAR) V(Lit exp.)	0	(M4-5)	(P1-2)	(P1-2)	N	N	-	-1.2682	PP-LFER	-0.736667	0.0351188	lit exp.	5	-0.556555	0.12946	5	1000000	EPI exp.	5	593172	0.614303	8	1	B(QSAR)	-	-	-	16920	OECD exp.	0.00018197	Lit exp.
p67-63-0,s17927-72-9,s65175-01-1,h75-26-3,h75-29-6,h108-20-3,h108-21-4,h108-23-6,h109-59-1,h110-27-0,h112-11-8,h141-98-0,h142-91-6,h542-08-5,h924-88-9,h1132-95-2,h6938-94-9,h7491-02-3,h10233-13-3,h14205-46-0,h19234-20-9,h49562-28-9,h51368-55-9,h68171-33-5,h71566-54-6,h71735-74-5,h98298-66-9,h298692-41-8,h1112262-71-1	CC(O)C	propan-2-ol:bis(pentane-2,4-dionato-O,O')bis(propan-2-olato)titanium:Estra-1,3,5(10)-triene-3,17-diol (17β)-, 3-[bis(2-chloroethyl)carbamate] 17-(dihydrogen phosphate), compd. with 2-propanol (1:1)	hydrolysis_product,parent_chemical,salt_or_mixture_component	60.0965	organic	neutral	Unstable MOC	Unstable MOC	0		5	0	Doc (PP-LFER)	1	B(QSAR)	1	B(QSAR) V(Lit exp.)	0	(M4-5)	(P1-2)	(P1-2)	N	N	-	-0.68124	PP-LFER	0.09	0.0565685	lit exp.	5	0.259752	0.10329	5	1000000	EPI exp.	5	217496	0.588075	8	1	B(QSAR)	-	-	-	6020	Lit. Exp.	0.000331131	Lit exp.
p67-64-1,h77-76-9,h78-95-5,h108-22-5,h127-06-0,h921-03-9,h2033-24-1,h25092-32-4,h39672-75-8,h57280-22-5,h79944-37-9,h124655-09-0,h125971-95-1,h204254-84-2,h274693-53-7,h376608-74-1,h1112262-71-1	CC(=O)C	acetone	hydrolysis_product,parent_chemical	58.0805	organic	neutral	Unstable MOC	Unstable MOC	0		5	0	Doc (PP-LFER)	1	B(exp)	1	B(exp) V(OECD exp.)	0	(M4-5)	(P1-2)	(P1-2)	N	N	-	-0.74716	PP-LFER	-0.24	0	lit exp.	5	-0.0214033	0.17222	5	1000000	EPI exp.	5	182089	0.596461	8	1	B(exp)	-	-	-	30800	Lit. Exp.	0.00106015	OECD exp.
p67-66-3,h76-02-8,h76-03-9,h515-84-4,h598-99-2	ClC(Cl)Cl	chloroform	hydrolysis_product,parent_chemical	119.378	organic	neutral	4.5	Unstable MOC	0		4	0	Doc (OECD & lit exp.)	3	B(QSAR)	1	V(Lit exp.)	0	(M2-3)	(P3-4)	(P1-2)	N	N	-	2	OECD exp.	1.96	0.0173205	lit exp.	4	1.67547	0.135382	5	8700	OECD exp.	4	4298.43	0.613764	8	3	B(QSAR)	4	Hydrowin	-	26200	Lit. Exp.	0.162181	Lit exp.
p67-68-5	CS(=O)C	dimethyl sulfoxide	parent_chemical	78.1334	organic	neutral	3	3	0.707107		5	0	Doc (OECD & lit exp.)	2	B(QSAR)	2	B(QSAR)	0.707107	(M4-5)	(P1-2)	(P1-2)	N	N	-	0.64	OECD exp.	-1.07416	0.448282	Avg. QSAR	5	-1.07416	0.448282	5	1000000	EPI exp.	5	1.05534e+06	1.42002	8	2	B(QSAR)	-	-	-	87.3	Lit. Exp.	3.50343e-07	OECD exp.
p68-11-1,h757-86-8,h25103-09-7,h30618-84-9,h64987-06-0	OC(=O)CS	mercaptoacetic acid	hydrolysis_product,parent_chemical	92.1169	organic	neutral	Unstable MOC	Unstable MOC	0	exp	5	0	Swater (EPI exp.)	1	B(exp)	1	B(exp)	0	(M4-5)	(P1-2)	(P1-2)	N	N	-	-	-	-1.53358	1.42725	Avg. QSAR	5	-1.53358	1.42725	5	1000000	EPI exp.	5	1.38627e+06	2.06686	8	1	B(exp)	-	-	-	10.133	OECD exp.	4.08969e-05	OECD exp.
p68-12-2,h4637-24-5	O=CN(C)C	N,N-dimethylformamide	hydrolysis_product,parent_chemical	73.0952	organic	neutral	Unstable MOC	Unstable MOC	0		5	0	Doc (PP-LFER)	1	B(QSAR)	1	B(QSAR)	0	(M4-5)	(P3-4)	(P3-4)	N	N	-	-1.21218	PP-LFER	-1.01		lit exp.	5	-0.662216	0.159545	5	1000000	EPI exp.	5	754649	0.903023	8	1	B(QSAR)	-	-	-	537	Lit. Exp.	1.86209e-06	Lit exp.
p68-22-4	C#C[C@]1(O)CC[C@@H]2[C@]1(C)CC[C@H]1[C@H]2CCC2=CC(=O)CC[C@H]12	norethisterone	parent_chemical	298.428	organic	neutral	4	4	0		2	0	Swater (EPI exp.)	4	B(QSAR)	4	B(QSAR) V(QSAR avg.)	0	(M2-3)	(P3-4)	(P3-4)	N	N	-	-	-	3.44486	0.62679	Avg. QSAR	2	3.44486	0.62679	5	7.04	EPI exp.	2	33.8502	1.2129	8	4	B(QSAR)	-	-	-	0.001	OECD exp.	1.1967e-08	QSAR avg.
p68-26-8	OC/C=C(/C=C/C=C(/C=C/C1=C(C)CCCC1(C)C)\C)\C	retinol	parent_chemical	286.46	organic	neutral	3	Transient	1		2	0.707107	Swater (Avg. QSAR)	3	B(QSAR)	1	V(QSAR avg.)	0.707107	(M2-3)	(P1-2)	(P1-2)	N	N	-	-	-	6.21263	1.25923	Avg. QSAR	1	6.21263	1.25923	5	0.668625	QSAR avg	2	0.668625	1.19159	8	3	B(QSAR)	-	-	-	1.54097e-05	QSAR avg.	0.00237201	QSAR avg.
p69-53-4	NC(c1ccccc1)C(=O)NC1C(=O)N2C1SC(C2C(=O)O)(C)C	ampicillin	parent_chemical	349.411	organic	ionizable	2	2	1.41421		4	0	Swater (EPI exp.)	2	H(LHC QSAR)	2	H(LHC QSAR)	1.41421	(M4-5)	(P3-4)	(P3-4)	amph	amphoprotic	-	-	-	-1.65593	1.80765	Avg. QSAR	5	-1.65593	1.80765	5	7560	EPI exp.	5	376859	1.5489	8	3	B(QSAR)	2	LHC QSAR	-	1.96984e-11	QSAR avg.	4.88738e-16	QSAR avg.
p69-72-7,h50-78-2,h65-45-2,h118-56-9,h118-58-1,h118-60-5,h119-36-8,h611-20-1,h6259-76-3,h25485-88-5,h65405-77-8,h873888-84-7	OC(=O)c1ccccc1O	salicylic acid	hydrolysis_product,parent_chemical	138.124	organic	ionizable	Unstable MOC	Unstable MOC	0	exp	5	0	Doc (OECD & lit exp.)	1	B(exp)	1	B(exp)	0	(M4-5)	(P1-2)	(P1-2)	A	2.78	Exp (Liao et al (2009))	-5.68	OECD exp.	0.159018	1.95574	Avg. QSAR	5	-2.72898	2.02728	5	2240	EPI exp.	5	8.44276e+10	1.24289	8	1	B(exp)	-	-	-	0.0109306	EPIwin Exp.	3.00167e-07	EPI exp.
p70-51-9,h402913-84-2	NCCCCCN(C(=O)CCC(=O)NCCCCCN(C(=O)CCC(=O)NCCCCCN(C(=O)C)O)O)O	deferoxamine	hydrolysis_product,parent_chemical	560.695	organic	ionizable	5	5	1.41421		5	0	Swater (EPI exp.)	4	B(QSAR)	4	B(QSAR) V(QSAR avg.)	1.41421	(M4-5)	(P1-2)	(P1-2)	amph	amphoprotic	-	-	-	-3.1114	1.67386	Avg. QSAR	5	-3.1114	1.67386	5	12000	EPI exp.	5	1.52184e+07	1.6514	8	4	B(QSAR)	-	-	-	4.2213e-26	QSAR avg.	4.2913e-35	QSAR avg.
p70-54-2,s70-53-1,s657-27-2,h103300-89-6	NCCCCC(C(=O)O)N	DL-lysine:DL-lysine monohydrochloride:lysine hydrochloride	hydrolysis_product,parent_chemical,salt_or_mixture_component	146.19	organic	ionizable	Unstable MOC	Unstable MOC	0		5	0	Swater (EPI exp.)	1	B(QSAR)	1	B(QSAR)	0	(M4-5)	(P1-2)	(P1-2)	amph	amphoprotic	-	-	-	-3.40539	2.06792	Avg. QSAR	5	-3.40539	2.06792	5	1000000	EPI exp.	5	3.26848e+06	2.36981	8	1	B(QSAR)	-	-	-	7.03824e-07	EPIwin Exp.	1.74847e-10	QSAR avg.
p70-55-3,s1333-07-9,h4083-64-1,h5577-13-9,h13909-63-2,h232938-43-1	Cc1ccc(cc1)S(=O)(=O)N	toluene-4-sulphonamide:toluenesulphonamide	hydrolysis_product,parent_chemical,salt_or_mixture_component	171.219	organic	ionizable	Unstable MOC	Unstable MOC	0.57735	exp	4	0.57735	Swater (OECD & lit exp.)	1	B(exp)	1	B(exp)	0	(M2-3)	(P3-4)	(P3-4)	A	10.1561	QSAR (SPARC)	-	-	0.570034		lit exp.	5	0.811045	0.208372	5	5264.15	OECD exp.	4	7013.75	0.877433	8	1	B(exp)	-	-	-	0.0129256	QSAR avg.	9.61702e-06	QSAR avg.
p71-23-8,h94-13-3,h106-94-5,h109-60-4,h109-61-5,h621-76-1,h682-01-9,h1569-01-3,h2807-30-9,h29911-27-1,h53651-69-7	CCCO	propan-1-ol	hydrolysis_product,parent_chemical	60.0965	organic	neutral	Unstable MOC	Unstable MOC	0		5	0	Doc (PP-LFER)	1	B(exp)	1	B(exp) V(Lit exp.)	0	(M4-5)	(P1-2)	(P1-2)	N	N	-	-0.34546	PP-LFER	0.26	0.0173205	lit exp.	5	0.360751	0.123383	5	1000000	EPI exp.	5	157465	0.510868	8	1	B(exp)	-	-	-	2759.98	OECD exp.	0.000275423	Lit exp.
p71-30-7	Nc1cc[nH]c(=O)n1	cytosine	parent_chemical	111.104	organic	ionizable	2	2	0.707107		4	0	Swater (EPI exp.)	2	B(QSAR)	2	B(QSAR)	0.707107	(M4-5)	(P1-2)	(P1-2)	amph	amphoprotic	-	-	-	-1.50842	0.39626	Avg. QSAR	5	-1.50842	0.39626	4	8000	EPI exp.	5	255055	1.45964	6	2	B(QSAR)	-	-	-	0.000278597	QSAR avg.	1.96703e-09	QSAR avg.
p71-36-3,s5593-70-4,h51-03-6,h77-90-7,h77-94-1,h78-51-3,h84-74-2,h85-68-7,h97-88-1,h105-75-9,h105-99-7,h109-43-3,h109-69-3,h111-76-2,h112-07-2,h112-34-5,h112-73-2,h123-86-4,h124-17-4,h126-73-8,h141-17-3,h141-18-4,h141-32-2,h142-96-1,h143-22-6,h143-29-3,h925-21-3,h1809-19-4,h1962-75-0,h2568-90-3,h4121-12-4,h5131-66-8,h6172-80-1,h6606-65-1,h7328-22-5,h7397-62-8,h9003-13-8,h9004-77-7,h12788-93-1,h14…	CCCCO	butan-1-ol:titanium tetrabutanolate	hydrolysis_product,parent_chemical,salt_or_mixture_component	74.1235	organic	neutral	Unstable MOC	Unstable MOC	0		5	0	Doc (OECD & lit exp.)	1	B(QSAR)	1	B(QSAR) V(OECD exp.)	0	(M4-5)	(P1-2)	(P1-2)	N	N	-	0.388	OECD exp.	0.8475	0.065	lit exp.	5	0.873438	0.118092	5	66000	OECD exp.	5	54083.2	0.434184	8	1	B(QSAR)	-	-	-	931	OECD exp.	0.000422022	OECD exp.
p71-41-0,h110-53-2,h624-54-4	CCCCCO	pentan-1-ol	hydrolysis_product,parent_chemical	88.1505	organic	neutral	Unstable MOC	Unstable MOC	0.57735		5	0.57735	Doc (PP-LFER)	1	B(QSAR)	1	B(QSAR) V(Lit exp.)	0	(M2-3)	(P1-2)	(P1-2)	N	N	-	0.57344	PP-LFER	1.52	0.08	lit exp.	4	1.38393	0.145458	5	22000	EPI exp.	5	17989.8	0.380079	8	1	B(QSAR)	-	-	-	259	Lit. Exp.	0.000446684	Lit exp.
p71-43-2	c1ccccc1	benzene	parent_chemical	78.1144	organic	neutral	Unstable MOC	Unstable MOC	0		4	0	Doc (PP-LFER)	1	B(exp)	1	B(exp) V(Lit exp.)	0	(M2-3)	(P3-4)	(P3-4)	N	N	-	1.40644	PP-LFER	2.145	0.03	lit exp.	4	1.96302	0.0833279	5	1880	OECD exp.	4	2082.68	0.726127	8	1	B(exp)	-	-	-	12700	Lit. Exp.	0.234423	Lit exp.
p71-55-6	CC(Cl)(Cl)Cl	1,1,1-trichloroethane	parent_chemical	133.405	organic	neutral	4.5	Unstable MOC	0.547723		4	0.547723	Doc (PP-LFER)	4	B(QSAR) H(Hydrowin)	1	V(OECD exp.)	0	(M2-3)	(P3-4)	(P1-2)	N	N	-	1.70302	PP-LFER	2.49		OECD exp	3	2.39039	0.321543	5	1500	OECD exp.	4	1073.06	0.398701	8	4	B(QSAR)	4	Hydrowin	-	13300	OECD exp.	0.477427	OECD exp.
p72-18-4	[NH3+][C@H](C(=O)[O-])C(C)C	L-valine	parent_chemical	117.149	organic	zwitterion	Unstable MOC	Unstable MOC	0	exp	5	0	Swater (OECD & lit exp.)	1	B(exp)	1	B(exp)	0	(M4-5)	(P3-4)	(P1-2)	amph	amphoprotic	-	-	-	-2.26		OECD exp	5	-2.93023	0.639009	5	102400	OECD exp.	5	1.19537e+06	1.85046	6	1	B(exp)	-	-	-	4.5353e-06	OECD exp.	2.0942e-12	OECD exp.
p73-22-3	[O-]C(=O)[C@H](Cc1c[nH]c2c1cccc2)[NH3+]	L-tryptophan	parent_chemical	204.23	organic	zwitterion	Unstable MOC	Unstable MOC	0		5	0	Swater (Avg. QSAR)	1	B(exp)	1	B(exp)	0	(M4-5)	(P3-4)	(P3-4)	amph	amphoprotic	-	-	-	-1.06		OECD exp	5	-2.10761	0.677376	5	193735	QSAR avg	5	193735	2.06021	6	1	B(exp)	-	-	-	8.6135e-05	QSAR avg.	3.76231e-20	QSAR avg.
p74-79-3,s1119-34-2	OC(=O)C(CCCN=C(N)N)N	arginine:(+)-L-arginine hydrochloride	parent_chemical,salt_or_mixture_component	174.204	organic	ionizable	Unstable MOC	Unstable MOC	0	exp	5	0	Swater (OECD & lit exp.)	1	B(exp)	1	B(exp)	0	(M4-5)	(P3-4)	(P1-2)	amph	amphoprotic	-	-	-	-3.71847	1.74648	Avg. QSAR	5	-3.71847	1.74648	5	182000	OECD exp.	5	5.8765e+06	2.4284	8	1	B(exp)	2	LHC QSAR	-	1.8487e-07	OECD exp.	7.14211e-14	OECD exp.
p74-82-8	C	methane	parent_chemical	16.043	organic	neutral	Unstable MOC	Unstable MOC	1		5	1	Doc (PP-LFER)	1	B(QSAR)	1	B(QSAR) V(Lit exp.)	0	(M4-5)	(P1-2)	(P1-2)	N	N	-	0.14558	PP-LFER	1.09		lit exp.	5	1.01164	0.357836	5	61.2	OECD exp.	5	72275	2.35431	8	1	B(QSAR)	-	-	-	6.21178e+07	EPIwin Exp.	28.8403	Lit exp.
p74-83-9	CBr	bromomethane	parent_chemical	94.944	organic	neutral	Unstable MOC	Unstable MOC	0.707107		5	0	Doc (PP-LFER)	1	H(OECD exp.)	1	V(Lit exp.) H(OECD exp.)	0.707107	(M4-5)	(P1-2)	(P1-2)	N	N	-	0.6548	PP-LFER	1.19		lit exp.	5	1.07195	0.142097	5	15200	EPI exp.	5	21928.5	0.606362	8	2	B(QSAR)	1	OECD exp.	-	215946	EPIwin Exp.	0.251189	Lit exp.
p74-84-0	CC	ethane	parent_chemical	30.07	organic	neutral	Unstable MOC	Unstable MOC	0.816497		5	0.816497	Doc (PP-LFER)	1	B(QSAR)	1	B(QSAR) V(Lit exp.)	0	(M4-5)	(P1-2)	(P1-2)	N	N	-	0.75368	PP-LFER	1.81		lit exp.	4	1.47287	0.212562	5	61.2	OECD exp.	4	9517.25	1.67759	8	1	B(QSAR)	-	-	-	4198950	EPIwin Exp.	21.8776	Lit exp.
p74-85-1	C=C	ethylene	parent_chemical	28.0541	organic	neutral	Unstable MOC	Unstable MOC	1		5	1	Doc (PP-LFER)	1	B(QSAR)	1	B(QSAR) V(Lit exp.)	0	(M4-5)	(P1-2)	(P1-2)	N	N	-	0.26066	PP-LFER	1.13		lit exp.	5	1.20269	0.172968	5	131	OECD exp.	5	11490.5	1.341	8	1	B(QSAR)	-	-	-	6.94493e+06	EPIwin Exp.	8.70964	Lit exp.
p74-86-2	C#C	acetylene	parent_chemical	26.0381	organic	neutral	Unstable MOC	Unstable MOC	0.5		5	0.5	Doc (PP-LFER)	1	B(QSAR)	1	B(QSAR) V(EPI exp.)	0	(M4-5)	(P1-2)	(P1-2)	N	N	-	-0.2554	PP-LFER	0.37		lit exp.	5	0.621377	0.806667	5	1200	OECD exp.	5	137034	2.49148	8	1	B(QSAR)	-	-	-	4865450	EPIwin Exp.	0.887413	EPI exp.
p74-87-3	CCl	chloromethane	parent_chemical	50.488	organic	neutral	2	Unstable MOC	0.912871		4	0.57735	Doc (OECD & lit exp.)	2	B(QSAR)	1	V(OECD exp.)	0.707107	(M4-5)	(P1-2)	(P1-2)	N	N	-	1.121	OECD exp.	0.91		lit exp.	5	0.919146	0.122093	5	5320	EPI exp.	5	19643.2	0.622333	8	2	B(QSAR)	4	OECD exp.	-	573290	OECD exp.	0.360837	OECD exp.
p74-88-4	CI	iodomethane	parent_chemical	141.939	organic	neutral	3	Unstable MOC	0.57735		5	0.57735	Doc (PP-LFER)	2	B(QSAR)	1	V(Lit exp.)	0	(M4-5)	(P1-2)	(P1-2)	N	N	-	0.91124	PP-LFER	1.51		lit exp.	4	1.56813	0.0294434	5	13800	EPI exp.	4	8502.99	0.884923	8	2	B(QSAR)	4	OECD exp.	-	1.33052e+07	OECD exp.	0.223872	Lit exp.
p74-89-5,h79-16-3,h96-31-1,h123-39-7,h556-61-6,h598-50-5,h622-29-7,h2276-90-6,h2280-89-9,h4245-76-5,h6330-25-2,h6610-29-3,h284461-73-0,h284462-37-9	CN	methylamine	hydrolysis_product,parent_chemical	31.0576	organic	ionizable	Unstable MOC	Unstable MOC	0	exp	5	0	Doc (OECD & lit exp.)	1	B(exp)	1	B(exp) V(Lit exp.)	0	(M4-5)	(P1-2)	(P1-2)	B	10.66	Exp (CRC)	-5.629	OECD exp.	-7.23		lit exp.	5	-4.5253	2.7316	5	1080000	EPI exp.	5	1.89396e+12	1.05087	8	1	B(exp)	-	-	-	352850	OECD exp.	0.000457088	Lit exp.
p74-90-8	C#N	hydrogen cyanide	parent_chemical	27.0258	organic	ionizable	Unstable MOC	Unstable MOC	0	exp	5	0	Swater (EPI exp.)	1	B(QSAR) H(OECD exp.)	1	B(QSAR) V(OECD exp.) H(OECD exp.)	0	(M4-5)	(P1-2)	(P1-2)	B	9.36	Exp (OECD)	-	-	-0.257957	0.290929	Avg. QSAR	5	-2.40196	3.12511	5	1000000	EPI exp.	5	2.813e+10	1.04902	8	1	B(QSAR)	1	OECD exp.	-	98908.6	EPIwin Exp.	0.00544081	OECD exp.
p74-93-1,h868-84-8,h91507-67-4,h860035-07-0	CS	methanethiol	hydrolysis_product,parent_chemical	48.107	organic	ionizable	Unstable MOC	Unstable MOC	0		5	0	Doc (PP-LFER)	1	B(QSAR)	1	B(QSAR) V(OECD exp.)	0	(M4-5)	(P1-2)	(P1-2)	A	10.33	Exp (CRC)	0.245752	PP-LFER	0.483352		lit exp.	5	0.590937	0.0972981	5	34198.2	OECD exp.	5	184832	1.85166	8	1	B(QSAR)	-	-	-	201000	OECD exp.	0.167503	OECD exp.
p74-95-3	BrCBr	dibromomethane	parent_chemical	173.845	organic	neutral	2	Unstable MOC	0.707107		4	0	Doc (PP-LFER)	2	B(QSAR)	1	V(OECD exp.)	0.707107	(M2-3)	(P3-4)	(P3-4)	N	N	-	1.26584	PP-LFER	1.34036	0.268391	Avg. QSAR	4	1.34036	0.268391	5	8600	OECD exp.	4	8980.52	0.992109	8	2	B(QSAR)	4	Hydrowin	-	4700	OECD exp.	0.0383474	OECD exp.
p74-96-4	CCBr	bromoethane	parent_chemical	108.971	organic	neutral	2	Unstable MOC	0.707107		4	0	Doc (PP-LFER)	2	B(QSAR) H(LHC QSAR)	1	V(Lit exp.)	0.707107	(M2-3)	(P1-2)	(P1-2)	N	N	-	1.05	PP-LFER	1.61	0	lit exp.	4	1.48874	0.164738	5	9000	EPI exp.	4	8171.36	0.437536	8	2	B(QSAR)	2	LHC QSAR	-	62500	Lit. Exp.	0.288403	Lit exp.
p74-97-5	ClCBr	bromochloromethane	parent_chemical	129.389	organic	neutral	2	Unstable MOC	0.57735		4	0.57735	Doc (PP-LFER)	2	B(QSAR)	1	V(EPI exp.)	0	(M2-3)	(P3-4)	(P1-2)	N	N	-	1.0081	PP-LFER	1.25944	0.191848	Avg. QSAR	4	1.25944	0.191848	5	16700	EPI exp.	5	12422.7	0.883941	8	2	B(QSAR)	4	Hydrowin	-	18886	OECD exp.	0.0597061	EPI exp.
p74-98-6	CCC	propane	parent_chemical	44.0971	organic	neutral	Unstable MOC	Unstable MOC	0.5		4	0.5	Doc (PP-LFER)	1	B(QSAR)	1	B(QSAR) V(Lit exp.)	0	(M4-5)	(P1-2)	(P1-2)	N	N	-	1.2242	PP-LFER	2.36		lit exp.	4	1.96492	0.251226	5	61.2	OECD exp.	4	3062.65	2.10401	8	1	B(QSAR)	-	-	-	953095	EPIwin Exp.	27.5423	Lit exp.
p75-00-3	CCCl	chloroethane	parent_chemical	64.515	organic	neutral	3	Unstable MOC	0.912871		5	0.57735	Doc (PP-LFER)	2	B(QSAR)	1	V(OECD exp.)	0.707107	(M4-5)	(P1-2)	(P1-2)	N	N	-	0.81572	PP-LFER	1.43	0	lit exp.	4	1.33236	0.162371	5	6710	EPI exp.	4	9341.25	0.495323	8	2	B(QSAR)	4	OECD exp.	-	160000	Lit. Exp.	0.425021	OECD exp.
p75-01-4	ClC=C	chloroethylene	parent_chemical	62.4991	organic	neutral	3	Unstable MOC	0.866025		5	0.5	Doc (PP-LFER)	2	B(QSAR)	1	V(OECD exp.)	0.707107	(M4-5)	(P1-2)	(P1-2)	N	N	-	0.80276	PP-LFER	1.52		lit exp.	4	1.44292	0.258037	5	1100	OECD exp.	4	8105.45	0.655425	8	2	B(QSAR)	-	-	-	396340	OECD exp.	9.08914	OECD exp.
p75-02-5	FC=C	fluoroethylene	parent_chemical	46.0445	organic	neutral	Unstable MOC	Unstable MOC	0.57735		4	0.57735	Swater (OECD & lit exp.)	1	B(QSAR)	1	B(QSAR) V(QSAR avg.)	0	(M4-5)	(P1-2)	(P1-2)	N	N	-	-	-	1.01068	0.278573	Avg. QSAR	5	1.01068	0.278573	5	9400	OECD exp.	5	12264.7	0.502522	8	1	B(QSAR)	-	-	-	2639340	EPIwin Exp.	3.46996	QSAR avg.
p75-04-7,h105-55-5,h141-98-0,h41078-06-2,h1122460-01-8	CCN	ethylamine	hydrolysis_product,parent_chemical	45.0847	organic	ionizable	Unstable MOC	Unstable MOC	0	exp	5	0	Doc (OECD & lit exp.)	1	B(exp)	1	B(exp) V(Lit exp.)	0	(M4-5)	(P1-2)	(P1-2)	B	10.65	Exp (CRC)	-5.29	OECD exp.	-6.78	0	lit exp.	5	-4.15516	2.55052	5	1000000	EPI exp.	5	3.01882e+12	1.36194	8	1	B(exp)	-	-	-	139700	OECD exp.	0.000501187	Lit exp.
p75-05-8	CC#N	acetonitrile	parent_chemical	41.0528	organic	neutral	Unstable MOC	Unstable MOC	0		5	0	Doc (PP-LFER)	1	B(exp)	1	B(exp) V(Lit exp.)	0	(M4-5)	(P1-2)	(P1-2)	N	N	-	-0.55714	PP-LFER	-0.34	0	lit exp.	5	-0.147608	0.115593	5	1000000	EPI exp.	5	128420	0.680993	8	1	B(exp)	3	LHC QSAR	-	11838	OECD exp.	0.00141254	Lit exp.
p75-07-0,h94-04-2,h97-97-2,h107-20-0,h107-29-9,h108-05-4,h123-63-7,h2146-71-6,h34432-92-3,h51000-52-3,h54423-67-5,h91507-67-4,h98298-66-9,h162691-59-0,h860035-07-0	CC=O	acetaldehyde	hydrolysis_product,parent_chemical	44.0535	organic	neutral	Unstable MOC	Unstable MOC	0		5	0	Doc (PP-LFER)	1	B(exp)	1	B(exp) V(Lit exp.)	0	(M4-5)	(P1-2)	(P1-2)	N	N	-	-0.9882	PP-LFER	-0.217411	0.0923666	Avg. QSAR	5	-0.217411	0.0923666	5	1000000	EPI exp.	5	263578	0.610902	8	1	B(exp)	-	-	-	120200	OECD exp.	0.00269153	Lit exp.
p75-08-1,h759-94-4,h2941-64-2	CCS	ethanethiol	hydrolysis_product,parent_chemical	62.134	organic	ionizable	Unstable MOC	Unstable MOC	0.5		5	0.5	Doc (PP-LFER)	1	B(QSAR)	1	B(QSAR) V(Lit exp.)	0	(M4-5)	(P1-2)	(P1-2)	A	9.9631	QSAR (SPARC)	0.407988	PP-LFER	0.860128		lit exp.	5	0.912401	0.0860078	5	18505.7	OECD exp.	5	119814	2.05612	8	1	B(QSAR)	-	-	-	70300	Lit. Exp.	0.144544	Lit exp.
p75-09-2	ClCCl	dichloromethane	parent_chemical	84.933	organic	neutral	Unstable MOC	Unstable MOC	0		5	0	Doc (PP-LFER)	1	B(exp)	1	B(exp) V(OECD exp.)	0	(M4-5)	(P3-4)	(P1-2)	N	N	-	0.93546	PP-LFER	1.21667	0.057735	lit exp.	5	1.17684	0.16653	5	13200	OECD exp.	5	14911.2	0.782443	8	1	B(exp)	4	OECD exp.	4	58400	OECD exp.	0.0808736	OECD exp.
p75-10-5	FCF	difluoromethane	parent_chemical	52.0238	organic	neutral	Unstable MOC	Unstable MOC	0.5		5	0.5	Doc (PP-LFER)	1	B(QSAR)	1	B(QSAR) V(OECD exp.)	0	(M4-5)	(P1-2)	(P1-2)	N	N	-	-0.2888	PP-LFER	0.582377	0.345461	Avg. QSAR	5	0.582377	0.345461	5	4400	OECD exp.	5	16390.5	0.723664	8	1	B(QSAR)	4	Hydrowin	-	1.70677e+06	OECD exp.	8.14513	OECD exp.
p75-12-7,h288-88-0,h91273-04-0,h144333-84-6,h188416-34-4	NC=O	formamide	hydrolysis_product,parent_chemical	45.0411	organic	neutral	Unstable MOC	Unstable MOC	0		5	0	Doc (OECD & lit exp.)	1	B(QSAR)	1	B(QSAR)	0	(M4-5)	(P1-2)	(P1-2)	N	N	-	0.555	OECD exp.	-1.51		lit exp.	5	-1.36062	0.436999	5	1000000	EPI exp.	5	477200	0.792646	8	1	B(QSAR)	-	-	-	8.1313	EPIwin Exp.	5.68435e-08	EPI exp.
p75-15-0,h97-74-5,h97-77-8,h137-26-8,h10591-84-1,h10591-85-2	S=C=S	carbon disulphide	hydrolysis_product,parent_chemical	76.1391	pseudo-organic	neutral	Transient	Transient	1	exp	2	1	Doc (OECD & lit exp.)	1	B(exp)	1	B(exp) V(OECD exp.)	0	(M4-5)	(P3-4)	(P3-4)	N	N	-	3.4	OECD exp.	1.94		lit exp.	4	1.77195	0.201443	4	2900	OECD exp.	4	1491.04	0.657261	6	1	B(exp)	4	OECD exp.	-	27400	OECD exp.	0.290358	OECD exp.
p75-18-3,s13292-87-0	CSC	dimethyl sulphide:dimethyl sulphide--borane	parent_chemical,salt_or_mixture_component	62.134	organic	neutral	Unstable MOC	Unstable MOC	0		5	0	Doc (PP-LFER)	1	B(exp)	1	B(exp) V(Lit exp.)	0	(M4-5)	(P1-2)	(P1-2)	N	N	-	0.46158	PP-LFER	0.988231	0.171115	Avg. QSAR	5	0.988231	0.171115	5	22000	OECD exp.	5	28847.7	0.435931	8	1	B(exp)	-	-	-	66916.6	EPIwin Exp.	0.0660693	Lit exp.
p75-21-8	O1CC1	ethylene oxide	parent_chemical	44.0535	organic	neutral	Unstable MOC	Unstable MOC	0	exp	5	0	Doc (OECD & lit exp.)	1	B(exp) H(OECD exp.)	1	B(exp) V(EPI exp.) H(OECD exp.)	0	(M4-5)	(P1-2)	(P1-2)	N	N	-	0.59	OECD exp.	-0.3		OECD exp	5	-0.118606	0.0903891	5	1000000	EPI exp.	5	191635	0.540461	8	1	B(exp)	1	OECD exp.	-	174623	EPIwin Exp.	0.0060524	EPI exp.
p75-24-1	C[Al](C)C	trimethylaluminium	parent_chemical	72.0865	organo_metallic	neutral	Unstable MOC	Unstable MOC	1		5	0.707107	Swater (Avg. QSAR)	1	H(LHC QSAR)	1	H(LHC QSAR)	0.707107	(M4-5)	(P3-4)	(P3-4)	N	N	-	-	-	2.08541	0.702854	Avg. QSAR	4	2.08541	0.702854	4	241635	QSAR avg	5	241635	2.31404	6	2	B(QSAR)	1	LHC QSAR	-	1652.92	EPIwin Exp.	-	-
p75-26-3	CC(Br)C	2-bromopropane	parent_chemical	122.998	organic	neutral	2	Unstable MOC	0.707107		4	0	Doc (PP-LFER)	2	B(QSAR)	1	V(Lit exp.)	0.707107	(M2-3)	(P1-2)	(P1-2)	N	N	-	1.3472	PP-LFER	2.1		lit exp.	4	1.96056	0.208819	5	3180	EPI exp.	4	3678.13	0.559301	8	2	B(QSAR)	3	LHC QSAR	-	28900	Lit. Exp.	0.446684	Lit exp.
p75-28-5	CC(C)C	isobutane	parent_chemical	58.1241	organic	neutral	2	Unstable MOC	0.912871		4	0.57735	Doc (PP-LFER)	2	B(QSAR)	1	V(Lit exp.)	0.707107	(M2-3)	(P1-2)	(P1-2)	N	N	-	1.58726	PP-LFER	2.76		lit exp.	3	2.34912	0.352718	5	61.2	OECD exp.	4	2335.05	2.27646	8	2	B(QSAR)	-	-	-	347913	EPIwin Exp.	50.1187	Lit exp.
p75-29-6	CC(Cl)C	2-chloropropane	parent_chemical	78.5421	organic	neutral	Unstable MOC	Unstable MOC	0		4	0	Doc (PP-LFER)	1	H(OECD exp.)	1	V(Lit exp.) H(OECD exp.)	0	(M2-3)	(P1-2)	(P1-2)	N	N	-	1.1248	PP-LFER	1.9		lit exp.	4	1.81303	0.207899	5	3100	EPI exp.	4	4389.26	0.632942	8	2	B(QSAR)	1	OECD exp.	-	68900	Lit. Exp.	0.660693	Lit exp.
p75-31-0,h13749-61-6	CC(N)C	isopropylamine	hydrolysis_product,parent_chemical	59.1117	organic	ionizable	Unstable MOC	Unstable MOC	0	exp	5	0	Swater (EPI exp.)	1	B(exp)	1	B(exp) V(EPI exp.)	0	(M2-3)	(P1-2)	(P1-2)	B	10.63	Exp (CRC)	-	-	-6.37		lit exp.	5	-3.70677	2.42772	5	1000000	EPI exp.	5	1.62552e+12	1.18861	8	1	B(exp)	-	-	-	77314	EPIwin Exp.	0.00184435	EPI exp.
p75-33-2	CC(S)C	propane-2-thiol	parent_chemical	76.1611	organic	ionizable	3	Unstable MOC	1		5	0.707107	Swater (Avg. QSAR)	2	B(QSAR)	1	V(QSAR avg.)	0.707107	(M2-3)	(P1-2)	(P1-2)	A	10.0589	QSAR (SPARC)	-	-	1.45418	0.213742	Avg. QSAR	4	1.34515	0.0959374	5	68327.1	QSAR avg	5	68327.1	2.27065	8	2	B(QSAR)	-	-	-	33100	OECD exp.	0.195036	QSAR avg.
p75-35-4	ClC(=C)Cl	1,1-dichloroethylene	parent_chemical	96.9441	organic	neutral	2	Unstable MOC	0		4	0	Doc (PP-LFER)	2	B(QSAR)	1	V(Lit exp.)	0	(M2-3)	(P3-4)	(P1-2)	N	N	-	1.3696	PP-LFER	2.13	0	lit exp.	4	2.00686	0.228815	5	2420	EPI exp.	4	3472.1	0.66642	8	2	B(QSAR)	-	-	-	80000	Lit. Exp.	1.51356	Lit exp.
p75-36-5,h79-04-9,h79-36-7	CC(=O)Cl	acetyl chloride	hydrolysis_product,parent_chemical	78.4985	organic	neutral	Unstable MOC	Unstable MOC	0.707107		5	0	Swater (Avg. QSAR)	1	H(LHC QSAR)	1	V(QSAR avg.) H(LHC QSAR)	0.707107	(M4-5)	(P1-2)	(P1-2)	N	N	-	-	OECD exp.	0.224239	0.435484	Avg. QSAR	5	0.224239	0.435484	5	148327	QSAR avg	5	148327	1.07041	8	2	B(QSAR)	1	LHC QSAR	-	38171	OECD exp.	0.0263641	QSAR avg.
p75-37-6	CC(F)F	1,1-difluoroethane	parent_chemical	66.0509	organic	neutral	3	Unstable MOC	0.912871		5	0.57735	Doc (PP-LFER)	2	B(QSAR)	1	V(EPI exp.)	0.707107	(M4-5)	(P1-2)	(P1-2)	N	N	-	0.1278	PP-LFER	0.92443	0.334406	Avg. QSAR	5	0.92443	0.334406	5	3200	OECD exp.	4	7357.11	0.532296	8	2	B(QSAR)	4	Hydrowin	-	606515	EPIwin Exp.	0.830161	EPI exp.
p75-38-7	FC(=C)F	1,1-difluoroethylene	parent_chemical	64.0349	organic	neutral	Unstable MOC	Unstable MOC	0		4	0	Doc (OECD & lit exp.)	1	B(QSAR)	1	B(QSAR) V(EPI exp.)	0	(M4-5)	(P1-2)	(P1-2)	N	N	-	1.08	OECD exp.	1.26204	0.197353	Avg. QSAR	4	1.26204	0.197353	5	169	EPI exp.	4	9052.42	0.910116	8	1	B(QSAR)	-	-	-	4000000	OECD exp.	15.4991	EPI exp.
p75-44-5	ClC(=O)Cl	phosgene	parent_chemical	98.9165	pseudo-organic	neutral	3	Unstable MOC	0.707107		5	0	Swater (Avg. QSAR)	2	B(QSAR)	1	V(EPI exp.)	0.707107	(M4-5)	(P1-2)	(P1-2)	N	N	-	-	-	0.674056	0.839687	Avg. QSAR	5	0.674056	0.839687	5	163275	QSAR avg	5	163275	1.43912	8	2	B(QSAR)	-	-	-	189286	EPIwin Exp.	0.68294	EPI exp.
p75-45-6	FC(Cl)F	chlorodifluoromethane	parent_chemical	86.4689	organic	neutral	3	Unstable MOC	0.57735		5	0.57735	Doc (PP-LFER)	2	B(QSAR)	1	V(EPI exp.)	0	(M4-5)	(P3-4)	(P1-2)	N	N	-	0.32588	PP-LFER	1.04531	0.26369	Avg. QSAR	5	1.04531	0.26369	5	2770	EPI exp.	4	7017.34	0.57397	8	2	B(QSAR)	4	Hydrowin	-	966425	EPIwin Exp.	1.66032	EPI exp.
p75-46-7	FC(F)F	trifluoromethane	parent_chemical	70.0143	organic	neutral	3	Unstable MOC	1.19024		5	0.957427	Doc (PP-LFER)	2	B(QSAR)	1	V(OECD exp.)	0.707107	(M4-5)	(P1-2)	(P1-2)	N	N	-	-0.08716	PP-LFER	0.768721	0.336273	Avg. QSAR	5	0.768721	0.336273	5	838	OECD exp.	4	6726.79	0.878631	8	2	B(QSAR)	4	Hydrowin	-	4705400	OECD exp.	158.677	OECD exp.
p75-50-3	CN(C)C	trimethylamine	parent_chemical	59.1117	organic	ionizable	3	Unstable MOC	0		5	0	Doc (OECD & lit exp.)	2	B(QSAR)	1	V(OECD exp.)	0	(M4-5)	(P3-4)	(P3-4)	B	9.8	Exp (OECD (averages))	-4.63	OECD exp.	-9.3		OECD exp	5	-3.50719	1.8305	5	890000	EPI exp.	5	2.41895e+11	1.16738	8	2	B(QSAR)	-	-	-	220570	OECD exp.	0.00425328	OECD exp.
p75-52-5	CN(=O)=O	nitromethane	parent_chemical	61.0405	organic	ionizable	Unstable MOC	Unstable MOC	0		5	0	Doc (PP-LFER)	1	B(QSAR)	1	B(QSAR) V(Lit exp.)	0	(M2-3)	(P3-4)	(P3-4)	A	10.21	Exp (CRC)	-0.683121	PP-LFER	-0.558601	0	lit exp.	5	-0.439608	0.729356	5	111000	EPI exp.	5	1.70484e+06	2.45709	8	1	B(QSAR)	-	-	-	4741.45	OECD exp.	0.00112202	Lit exp.
p75-54-7	C[SiH](Cl)Cl	dichloro(methyl)silane	parent_chemical	115.035	organo_silane	neutral	Unstable MOC	Unstable MOC	1		5	0.707107	Swater (Avg. QSAR)	1	H(LHC QSAR)	1	V(QSAR avg.) H(LHC QSAR)	0.707107	(M4-5)	(P1-2)	(P1-2)	N	N	-	-	-	1.78824	0.995337	Avg. QSAR	4	1.78824	0.995337	5	17902.4	QSAR avg	5	17902.4	1.34356	8	2	B(QSAR)	1	LHC QSAR	-	57195	OECD exp.	0.291902	QSAR avg.
p75-55-8	CC1CN1	2-methylaziridine	parent_chemical	57.0958	organic	ionizable	Unstable MOC	Unstable MOC	0		5	0	Swater (EPI exp.)	1	B(QSAR) H(LHC QSAR)	1	B(QSAR) V(EPI exp.) H(LHC QSAR)	0	(M4-5)	(P1-2)	(P1-2)	B	9.36249	QSAR (SPARC)	-	-	-1.37562	1.44819	Avg. QSAR	5	-3.52061	1.79318	5	1000000	EPI exp.	5	7.33006e+10	1.3854	8	1	B(QSAR)	1	LHC QSAR	-	18662	EPIwin Exp.	0.000408946	EPI exp.
p75-56-9,p15448-47-2,s38172-91-7	CC1CO1	methyloxirane:Oxirane, 2-methyl-, (2R)-:2-Propyn-1-ol, compd. with 2-methyloxirane (1:?)	parent_chemical,salt_or_mixture_component	58.0805	organic	neutral	Unstable MOC	Unstable MOC	0		5	0	Doc (PP-LFER)	1	B(exp) H(OECD exp.)	1	B(exp) V(EPI exp.) H(OECD exp.)	0	(M4-5)	(P1-2)	(P1-2)	N	N	-	-0.3679	PP-LFER	1		OECD exp	5	0.316779	0.10062	5	590000	EPI exp.	5	103993	0.485634	8	1	B(exp)	1	OECD exp.	-	74000	OECD exp.	0.00284627	EPI exp.
p75-63-8	FC(Br)(F)F	bromotrifluoromethane	parent_chemical	148.915	pseudo-organic	neutral	4.5	Unstable MOC	0.707107		4	0	Doc (PP-LFER)	4	B(QSAR)	1	V(EPI exp.)	0.707107	(M2-3)	(P3-4)	(P3-4)	N	N	-	1.02746	PP-LFER	2.03631	0.520009	Avg. QSAR	4	2.03631	0.520009	5	320	EPI exp.	4	1619.65	0.938781	8	4	B(QSAR)	-	-	-	1.64805e+06	OECD exp.	20.4064	EPI exp.
p75-64-9,h107-58-4,h1609-86-5,h136465-81-1,h154702-15-5	CC(N)(C)C	tert-butylamine	hydrolysis_product,parent_chemical	73.1388	organic	ionizable	Unstable MOC	Unstable MOC	0		5	0	Doc (OECD & lit exp.)	1	B(QSAR)	1	B(QSAR) V(EPI exp.)	0	(M4-5)	(P1-2)	(P1-2)	B	10.68	Exp (CRC)	-3.705	OECD exp.	-6.28		lit exp.	5	-3.30181	2.43734	5	1000000	EPI exp.	5	8.75062e+11	1.30356	8	1	B(QSAR)	4	OECD exp.	-	49450	OECD exp.	0.00146403	EPI exp.
p75-65-0,h507-20-0,h540-88-5,h585-07-9,h637-92-3,h1634-04-4,h1663-39-4,h1694-31-1,h6368-20-3,h13122-18-4,h13734-41-3,h24424-99-5,h33021-02-2,h57260-71-6,h75302-98-6,h76028-96-1,h84348-37-8,h86978-24-7,h89604-92-2,h109010-60-8,h124655-09-0,h125971-95-1,h144978-12-1,h160232-08-6,h166170-15-6,h175463-32-8,h191226-98-9,h361440-67-7,h361442-00-4,h398489-26-4,h571188-59-5,h571189-16-7,h689293-69-4,h689…	CC(O)(C)C	2-methylpropan-2-ol	hydrolysis_product,parent_chemical	74.1235	organic	neutral	3	Unstable MOC	0.707107		5	0	Doc (PP-LFER)	2	B(QSAR)	1	V(Lit exp.)	0.707107	(M4-5)	(P1-2)	(P1-2)	N	N	-	-0.47098	PP-LFER	0.317		OECD exp	5	0.596139	0.105756	5	1000000	EPI exp.	5	117694	0.569536	8	2	B(QSAR)	-	-	-	5765.5	OECD exp.	0.000524807	Lit exp.
p75-66-1	CC(S)(C)C	2-methylpropane-2-thiol	parent_chemical	90.1881	organic	ionizable	2	Unstable MOC	0.57735		4	0.57735	Swater (OECD & lit exp.)	2	B(QSAR)	1	V(QSAR avg.)	0	(M2-3)	(P1-2)	(P1-2)	A	10.1048	QSAR (SPARC)	-	-	1.89285	0.43197	Avg. QSAR	4	1.79213	0.366527	5	2624.94	OECD exp.	5	19855.3	2.15783	8	2	B(QSAR)	-	-	-	24127.3	EPIwin Exp.	0.355787	QSAR avg.
p75-68-3	CC(Cl)(F)F	1-chloro-1,1-difluoroethane	parent_chemical	100.496	organic	neutral	5	Unstable MOC	0.866025		5	0.5	Doc (PP-LFER)	3	B(QSAR)	1	V(EPI exp.)	0.707107	(M4-5)	(P3-4)	(P1-2)	N	N	-	0.80054	PP-LFER	1.72292	0.183756	Avg. QSAR	4	1.72292	0.183756	5	1900	OECD exp.	4	1968.89	0.445027	8	3	B(QSAR)	4	Hydrowin	-	338582	EPIwin Exp.	2.4046	EPI exp.
p75-71-8	FC(Cl)(Cl)F	dichlorodifluoromethane	parent_chemical	120.914	pseudo-organic	neutral	4.5	Unstable MOC	0.912871		4	0.57735	Doc (PP-LFER)	4	B(QSAR)	1	V(EPI exp.)	0.707107	(M4-5)	(P3-4)	(P1-2)	N	N	-	1.02212	PP-LFER	2.24571	0.486338	Avg. QSAR	3	2.24571	0.486338	5	280	EPI exp.	4	1185.08	0.751983	8	4	B(QSAR)	-	-	-	646505	EPIwin Exp.	14.0269	EPI exp.
p75-75-2,s329181-36-4,s521300-98-1,s857035-95-1,h124-63-0,h35410-28-7,h60924-38-1,h82966-34-5,h111360-16-8,h120807-02-5,h204254-84-2	CS(=O)(=O)O	methanesulphonic acid:3-Pyrrolidinone, 4-(aminomethyl)-, O-methyloxime, (3Z)-, dimethanesulfonate:Ethanamine, 2-(2-ethoxyphenoxy)-, methanesulfonate (1:1):2,3-diamino-6,7-dihydro-1H,5H-pyrazolo[1,2-a]pyrazol-1-_x000D_one,dimethanesulfonate	hydrolysis_product,parent_chemical,salt_or_mixture_component	96.1052	organic	ionizable	Unstable MOC	Unstable MOC	0	exp	5	0	Swater (EPI exp.)	1	B(exp)	1	B(exp)	0	(M4-5)	(P1-2)	(P1-2)	A	0.415	QSAR (SPARC)	-	OECD exp.	-2.78225	0.402216	Avg. QSAR	5	-5.1785	4.53425	4	1000000	EPI exp.	5	1.5092e+15	1.22201	6	1	B(exp)	-	-	-	0.0632667	OECD exp.	5.15272e-07	QSAR avg.
p75-76-3	C[Si](C)(C)C	tetramethylsilane	parent_chemical	88.226	organo_silane	neutral	2	Unstable MOC	1.22474		4	1	Doc (PP-LFER)	2	B(QSAR)	1	V(EPI exp.)	0.707107	(M2-3)	(P1-2)	(P1-2)	N	N	-	1.76558	PP-LFER	2.7283	0.79587	Avg. QSAR	3	2.7283	0.79587	5	486524	QSAR avg	5	486524	2.63025	8	2	B(QSAR)	-	-	-	88950	OECD exp.	173.802	EPI exp.
p75-77-4	C[Si](Cl)(C)C	chlorotrimethylsilane	parent_chemical	108.644	organo_silane	neutral	Unstable MOC	Unstable MOC	1.58114		5	1.41421	Swater (Avg. QSAR)	1	H(LHC QSAR)	1	V(QSAR avg.) H(LHC QSAR)	0.707107	(M2-3)	(P1-2)	(P1-2)	N	N	-	-	-	2.55382	0.607304	Avg. QSAR	3	2.55382	0.607304	5	66815	QSAR avg	5	66815	2.53825	8	2	B(QSAR)	1	LHC QSAR	-	30920	OECD exp.	1.61757	QSAR avg.
p75-78-5	C[Si](Cl)(Cl)C	dichloro(dimethyl)silane	parent_chemical	129.062	organo_silane	neutral	Unstable MOC	Unstable MOC	1.58114		5	1.41421	Swater (Avg. QSAR)	1	H(LHC QSAR)	1	V(QSAR avg.) H(LHC QSAR)	0.707107	(M2-3)	(P1-2)	(P1-2)	N	N	-	-	-	2.28602	0.823707	Avg. QSAR	3	2.28602	0.823707	5	10989.1	QSAR avg	5	10989.1	1.93349	8	2	B(QSAR)	1	LHC QSAR	-	17949.2	OECD exp.	0.470593	QSAR avg.
p75-79-6	C[Si](Cl)(Cl)Cl	trichloro(methyl)silane	parent_chemical	149.48	organo_silane	neutral	4.5	Unstable MOC	1		4	0.707107	Swater (Avg. QSAR)	3	B(QSAR)	1	V(QSAR avg.)	0.707107	(M2-3)	(P1-2)	(P1-2)	N	N	-	-	-	2.33962	0.784773	Avg. QSAR	3	2.33962	0.784773	5	4718.54	QSAR avg	4	4718.54	1.35324	8	3	B(QSAR)	-	-	-	22261.1	EPIwin Exp.	0.15134	QSAR avg.
p75-85-4,h919-94-8,h994-05-8	CCC(O)(C)C	2-methylbutan-2-ol	hydrolysis_product,parent_chemical	88.1505	organic	neutral	3	Unstable MOC	0		5	0	Doc (OECD & lit exp.)	2	B(QSAR)	1	V(OECD exp.)	0	(M4-5)	(P1-2)	(P1-2)	N	N	-	0.62	OECD exp.	0.89		lit exp.	5	1.0833	0.109435	5	118000	OECD exp.	5	44873.5	0.495659	8	2	B(QSAR)	-	-	-	2226	OECD exp.	0.000671184	OECD exp.
p75-86-5	N#CC(O)(C)C	2-hydroxy-2-methylpropionitrile	parent_chemical	85.1063	organic	neutral	3	Unstable MOC	0.707107		5	0	Swater (EPI exp.)	2	B(QSAR)	1	V(QSAR avg.)	0.707107	(M4-5)	(P1-2)	(P1-2)	N	N	-	-	-	-0.129995	0.329356	Avg. QSAR	5	-0.129995	0.329356	5	1000000	EPI exp.	5	375532	1.29496	8	2	B(QSAR)	3	LHC QSAR	-	45.4553	EPIwin Exp.	0.000266382	QSAR avg.
p75-89-8,h120100-77-8	OCC(F)(F)F	2,2,2-trifluoroethanol	hydrolysis_product,parent_chemical	100.041	organic	neutral	5	Unstable MOC	0.707107		5	0	Doc (PP-LFER)	3	B(QSAR)	1	V(Lit exp.)	0.707107	(M4-5)	(P3-4)	(P3-4)	N	N	-	-0.37904	PP-LFER	0.41		lit exp.	5	0.278761	0.268073	5	1000000	EPI exp.	5	89147.6	0.989539	8	3	B(QSAR)	-	-	-	9870	Lit. Exp.	0.000691831	Lit exp.
p75-91-2,h109-13-7,h614-45-9,h927-07-1,h3006-82-4,h26748-41-4	OOC(C)(C)C	tert-butyl hydroperoxide	hydrolysis_product,parent_chemical	90.1229	organic	neutral	3	Unstable MOC	0		5	0	Swater (OECD & lit exp.)	2	B(QSAR)	1	V(QSAR avg.)	0	(M4-5)	(P1-2)	(P1-2)	N	N	-	-	-	0.846		OECD exp	5	0.854782	0.288768	5	691000	OECD exp.	5	47968.8	0.840175	8	2	B(QSAR)	-	-	-	729.151	EPIwin Exp.	0.000565724	QSAR avg.
p75-94-5	C=C[Si](Cl)(Cl)Cl	trichloro(vinyl)silane	parent_chemical	161.491	organo_silane	neutral	4.5	Unstable MOC	1		4	0.707107	Swater (Avg. QSAR)	3	B(QSAR)	1	V(QSAR avg.)	0.707107	(M2-3)	(P1-2)	(P1-2)	N	N	-	-	-	2.60519	0.642491	Avg. QSAR	3	2.60519	0.642491	5	1900.23	QSAR avg	4	1900.23	1.6614	8	3	B(QSAR)	-	-	-	8784.47	EPIwin Exp.	0.138672	QSAR avg.
p75-98-9,h927-07-1,h3282-30-2,h51167-18-1,h52561-72-5,h60209-82-7,h81058-27-7,h82543-09-7,h82543-14-4,h82544-13-6,h85390-94-9,h863329-69-5,h1283129-18-9	OC(=O)C(C)(C)C	pivalic acid	hydrolysis_product,parent_chemical	102.134	organic	ionizable	3	3	0.707107		5	0	Swater (EPI exp.)	2	B(QSAR)	2	B(QSAR)	0.707107	(M4-5)	(P1-2)	(P1-2)	A	5.03	Exp (CRC)	-	-	-3.97		OECD exp	5	-2.30184	1.52344	5	21700	EPI exp.	5	2.09867e+09	1.27933	8	2	B(QSAR)	4	OECD exp.	-	66.65	EPIwin Exp.	0.000113687	EPI exp.
p76-02-8	ClC(=O)C(Cl)(Cl)Cl	trichloroacetyl chloride	parent_chemical	181.834	organic	neutral	Unstable MOC	Unstable MOC	0		4	0	Swater (Avg. QSAR)	1	H(LHC QSAR)	1	V(EPI exp.) H(LHC QSAR)	0	(M4-5)	(P3-4)	(P1-2)	N	N	-	-	-	1.8876	0.602192	Avg. QSAR	4	1.8876	0.602192	5	5520.24	QSAR avg	4	5520.24	1.53514	8	4	B(QSAR)	1	LHC QSAR	-	2793	OECD exp.	0.0207336	EPI exp.
p76-03-9,h76-02-8,h515-84-4,h598-99-2	OC(=O)C(Cl)(Cl)Cl	trichloroacetic acid	hydrolysis_product,parent_chemical	163.388	organic	ionizable	Unstable MOC	Unstable MOC	1.41421		5	0	Swater (EPI exp.)	1	H(LHC QSAR)	1	H(LHC QSAR)	1.41421	(M4-5)	(P3-4)	(P1-2)	A	0.644	Exp (OECD (average))	-	OECD exp.	-8.026		lit exp.	5	-3.45268	3.37739	5	54600	EPI exp.	5	1.1852e+14	2.22592	7	4	B(QSAR)	1	LHC QSAR	-	7.98	OECD exp.	5.52077e-07	EPI exp.
p76-05-1,h354-32-5,h354-38-1,h354-58-5,h383-63-1,h407-25-0,h32539-16-5,h103300-89-6,h103300-91-0,h126586-91-2,h486460-32-6,h763105-70-0,h764667-65-4,h767340-03-4	OC(=O)C(F)(F)F	trifluoroacetic acid	hydrolysis_product,parent_chemical	114.024	organic	ionizable	5	5	1.41421		5	0	Swater (EPI exp.)	3	B(QSAR)	3	B(QSAR)	1.41421	(M4-5)	(P1-2)	(P1-2)	A	0.52	Exp (CRC)	-	-	-0.593168	1.82201	Avg. QSAR	5	-4.38517	3.69963	5	1000000	EPI exp.	5	4.0634e+14	2.02168	8	3	B(QSAR)	-	-	-	15800	OECD exp.	4.5393e-06	EPI exp.
p76-12-0	FC(C(Cl)(Cl)F)(Cl)Cl	tetrachloro-1,2-difluoroethane	parent_chemical	203.831	organic	neutral	4	Transient	0		3	0	Doc (PP-LFER)	4	B(QSAR)	1	V(EPI exp.)	0	(M2-3)	(P3-4)	(P3-4)	N	N	-	2.36616	PP-LFER	3.08315	0.20472	Avg. QSAR	3	3.08315	0.20472	5	120	EPI exp.	3	100.744	0.941441	8	4	B(QSAR)	-	-	-	6731.65	EPIwin Exp.	4.62109	EPI exp.
p76-16-4	FC(C(F)(F)F)(F)F	perfluoroethane	parent_chemical	138.013	organic	neutral	5	Unstable MOC	1		5	1	Doc (PP-LFER)	4	B(QSAR)	1	V(EPI exp.)	0	(M2-3)	(P3-4)	(P3-4)	N	N	-	0.80058	PP-LFER	1.93163	0.34598	Avg. QSAR	4	1.93163	0.34598	5	7.78	EPI exp.	3	331.286	1.19232	8	4	B(QSAR)	-	-	-	3.34583e+06	EPIwin Exp.	830.161	EPI exp.
p76-19-7	FC(C(F)(F)F)(C(F)(F)F)F	octafluoropropane	parent_chemical	188.02	organic	neutral	4.5	Unstable MOC	0.57735		4	0.57735	Doc (PP-LFER)	4	B(QSAR)	1	V(EPI exp.)	0	(M2-3)	(P3-4)	(P3-4)	N	N	-	1.23484	PP-LFER	2.61549	0.308289	Avg. QSAR	3	2.61549	0.308289	5	5.7	EPI exp.	3	73.7788	1.16885	8	4	B(QSAR)	-	-	-	883779	EPIwin Exp.	1349.52	EPI exp.
p76-22-2	O=C1C[C@H]2C([C@]1(C)CC2)(C)C	bornan-2-one	parent_chemical	152.238	organic	neutral	Transient	Transient	0	exp	3	0	Doc (OECD & lit exp.)	1	B(exp)	1	B(exp) V(EPI exp.)	0	(M2-3)	(P1-2)	(P1-2)	N	N	-	2.0683	OECD exp.	2.44029	0.385763	Avg. QSAR	3	2.44029	0.385763	5	100	EPI exp.	3	991.756	0.762552	8	1	B(exp)	-	-	-	86.45	OECD exp.	0.00331246	EPI exp.
p76-72-2	CCCC(C(C(=O)OCC)(C(=O)OCC)CC)C	diethyl ethyl(1-methylbutyl)malonate	parent_chemical	258.36	organic	neutral	Transient	Transient	0.707107		2	0	Swater (Avg. QSAR)	2	B(QSAR)	1	V(QSAR avg.)	0.707107	(M2-3)	(P1-2)	(P1-2)	N	N	-	-	-	3.91732	0.18706	Avg. QSAR	2	3.91732	0.18706	5	46.2312	QSAR avg	2	46.2312	0.719031	8	2	B(QSAR)	3	LHC QSAR	-	0.966958	QSAR avg.	0.000634715	QSAR avg.
p76-74-4,h76-75-5	CCCC(C1(CC)C(=O)NC(=O)NC1=O)C	pentobarbital	hydrolysis_product,parent_chemical	226.277	organic	ionizable	4	4	0.707107		3	0	Swater (EPI exp.)	4	B(QSAR)	4	B(QSAR) V(QSAR avg.)	0.707107	(M4-5)	(P1-2)	(P1-2)	A	7.23289	QSAR (SPARC)	-	-	1.11517	0.954999	Avg. QSAR	5	0.00802984	1.21533	5	679	EPI exp.	5	526010	1.58673	8	4	B(QSAR)	-	-	-	3.7762e-05	QSAR avg.	1.09447e-09	QSAR avg.
p76-75-5	CCCC(C1(CC)C(=O)NC(=S)NC1=O)C	5-ethyl-5-(1-methylbutyl)-2-thiobarbituric acid	parent_chemical	242.342	organic	ionizable	5	5	0.707107		5	0	Swater (Avg. QSAR)	3	B(QSAR)	3	B(QSAR)	0.707107	(M4-5)	(P3-4)	(P3-4)	A	7.58322	QSAR (SPARC)	-	-	1.15919	1.6421	Avg. QSAR	5	0.191809	2.18851	5	3.76386e+08	QSAR avg	5	3.76386e+08	2.64563	8	3	B(QSAR)	4	LHC QSAR	-	2.31773e-08	QSAR avg.	1.2984e-07	QSAR avg.
p76-89-1	COC(=O)C(c1ccccc1)(c1ccccc1)O	methyl benzilate	parent_chemical	242.276	organic	neutral	1	1	0.707107		3	0	Swater (Avg. QSAR)	2	B(QSAR)	2	B(QSAR)	0.707107	(M2-3)	(P3-4)	(P3-4)	N	N	-	-	-	2.65174	0.304318	Avg. QSAR	3	2.65174	0.304318	5	376.64	QSAR avg	3	376.64	1.00698	8	2	B(QSAR)	4	Hydrowin	-	0.00328133	QSAR avg.	4.25633e-06	QSAR avg.
p77-09-8	Oc1ccc(cc1)C1(OC(=O)c2c1cccc2)c1ccc(cc1)O	phenolphthalein	parent_chemical	318.331	organic	ionizable	Transient	Transient	1.1547	exp	3	1.1547	Swater (EPI exp.)	1	B(exp)	1	B(exp)	0	(M2-3)	(P1-2)	(P1-2)	A	9.7	Exp (CRC)	-	-	0.423565		OECD exp	3	2.93861	0.266746	5	400	EPI exp.	3	253.326	1.32413	8	1	B(exp)	-	-	-	4.97505e-11	QSAR avg.	2.38842e-14	QSAR avg.
p77-48-5	BrN1C(=O)N(C(C1=O)(C)C)Br	1,3-dibromo-5,5-dimethylhydantoin	parent_chemical	285.934	organic	neutral	Unstable MOC	Unstable MOC	0		5	0	Swater (Avg. QSAR)	1	H(LHC QSAR)	1	H(LHC QSAR)	0	(M4-5)	(P1-2)	(P3-4)	N	N	-	-	-	0.36653	0.903631	Avg. QSAR	5	0.36653	0.903631	5	62416.8	QSAR avg	5	62416.8	2.42694	8	4	B(QSAR)	1	LHC QSAR	-	0.00161343	QSAR avg.	1.31687e-05	QSAR avg.
p77-58-7	CCCC[Sn](OC(=O)CCCCCCCCCCC)(OC(=O)CCCCCCCCCCC)CCCC	dibutyltin dilaurate	parent_chemical	631.553	organo_metallic	neutral	Transient	Transient	0.707107		1	0	Swater (Avg. QSAR)	2	B(QSAR)	1	V(QSAR avg.)	0.707107	(M1)	(P3-4)	(P3-4)	N	N	-	-	-	10.8898	1.59946	Avg. QSAR	1	10.8898	1.59946	4	0.0392411	QSAR avg	1	0.0392411	2.21137	6	2	B(QSAR)	-	-	-	7.7e-06	OECD exp.	6.58403	QSAR avg.
p77-71-4,h77-48-5,h2232-12-4	O=C1NC(=O)C(N1)(C)C	5,5-dimethylhydantoin	hydrolysis_product,parent_chemical	128.131	organic	ionizable	Unstable MOC	Unstable MOC	0	exp	5	0	Doc (OECD & lit exp.)	1	B(exp)	1	B(exp)	0	(M4-5)	(P1-2)	(P1-2)	A	9.19	Exp (OECD)	0.897463	OECD exp.	-1.34754		OECD exp	5	-1.21071	0.563234	5	1.04392e+06	OECD exp.	5	555829	1.6081	8	1	B(exp)	4	OECD exp.	4	0.00038	OECD exp.	1.40373e-10	OECD exp.
p77-73-6	C1=CC2C(C1)C1C=CC2C1	3a,4,7,7a-tetrahydro-4,7-methanoindene	parent_chemical	132.207	organic	neutral	Transient	Transient	0.866025		2	0.5	Swater (OECD & lit exp.)	2	B(QSAR)	1	V(QSAR avg.)	0.707107	(M2-3)	(P1-2)	(P1-2)	N	N	-	-	-	2.78		OECD exp	3	3.04227	0.935237	5	20	OECD exp.	3	264.421	1.44943	8	2	B(QSAR)	-	-	-	305.257	EPIwin Exp.	3.10354	QSAR avg.
p77-75-8	CC(C#C)(CC)O	methylpentynol	parent_chemical	98.1457	organic	neutral	3	Unstable MOC	0		5	0	Swater (EPI exp.)	2	B(QSAR)	1	V(EPI exp.)	0	(M4-5)	(P1-2)	(P1-2)	N	N	-	-	-	1.16872	0.440909	Avg. QSAR	5	1.16872	0.440909	5	99000	EPI exp.	5	29622.1	0.638328	8	2	B(QSAR)	-	-	-	699.825	EPIwin Exp.	0.000280128	EPI exp.
p77-76-9	COC(OC)(C)C	acetone-dimethyl acetal	parent_chemical	104.15	organic	neutral	5	Unstable MOC	0.707107		5	0	Swater (Avg. QSAR)	4	B(QSAR)	1	V(QSAR avg.)	0.707107	(M2-3)	(P1-2)	(P1-2)	N	N	-	-	-	0.699191	0.522011	Avg. QSAR	5	0.699191	0.522011	5	53613.1	QSAR avg	5	53613.1	0.648796	8	4	B(QSAR)	-	-	-	13596.6	EPIwin Exp.	0.00976302	QSAR avg.
p77-78-1	COS(=O)(=O)OC	dimethyl sulphate	parent_chemical	126.132	organic	neutral	Unstable MOC	Unstable MOC	0.866025		4	0.5	Doc (OECD & lit exp.)	1	H(LHC QSAR)	1	H(LHC QSAR)	0.707107	(M4-5)	(P3-4)	(P3-4)	N	N	-	1.38	OECD exp.	-0.108313	0.312846	Avg. QSAR	5	-0.108313	0.312846	5	28000	OECD exp.	5	94445.2	0.61772	8	2	B(QSAR)	1	LHC QSAR	-	90.1273	OECD exp.	0.000163869	OECD exp.
p77-83-8	CCOC(=O)C1OC1(C)c1ccccc1	ethyl 2,3-epoxy-3-phenylbutyrate	parent_chemical	206.243	organic	neutral	Transient	Transient	0	exp	3	0	Doc (OECD & lit exp.)	1	H(OECD exp.)	1	H(OECD exp.)	0	(M2-3)	(P3-4)	(P3-4)	N	N	-	2.54	OECD exp.	2.47133	0.442067	Avg. QSAR	3	2.47133	0.442067	5	509.745	QSAR avg	3	509.745	0.572707	8	2	B(QSAR)	1	OECD exp.	-	0.669778	QSAR avg.	5.39937e-05	QSAR avg.
p77-86-1	OCC(CO)(CO)N	trometamol	parent_chemical	121.137	organic	ionizable	Unstable MOC	Unstable MOC	0	exp	5	0	Swater (OECD & lit exp.)	1	B(exp)	1	B(exp)	0	(M4-5)	(P1-2)	(P1-2)	B	8.0875	Exp (OECD (average))	-	-	-3.74688	1.55691	Avg. QSAR	5	-5.38189	2.16892	5	9.78646e+09	OECD exp.	5	1.04985e+11	2.14099	8	1	B(exp)	-	-	-	0.00142186	QSAR avg.	1.79387e-11	QSAR avg.
p77-90-7	CCCCOC(=O)C(OC(=O)C)(CC(=O)OCCCC)CC(=O)OCCCC	tributyl O-acetylcitrate	parent_chemical	402.488	organic	neutral	Transient	Transient	0.57735		2	0.57735	Doc (OECD & lit exp.)	1	B(QSAR)	1	B(QSAR)	0	(M2-3)	(P1-2)	(P3-4)	N	N	-	3.7655	OECD exp.	4.17782	0.563725	Avg. QSAR	2	4.17782	0.563725	5	5	EPI exp.	3	69.4331	2.21649	8	1	B(QSAR)	4	OECD exp.	-	0.00060515	OECD exp.	8.70187e-07	QSAR avg.
p77-92-9,h77-90-7,h77-93-0,h77-94-1,h144-15-0	OC(=O)C(CC(=O)O)(CC(=O)O)O	citric acid	hydrolysis_product,parent_chemical	192.126	organic	neutral	Unstable MOC	Unstable MOC	0	exp	5	0	Swater (EPI exp.)	1	B(exp)	1	B(exp)	0	(M4-5)	(P1-2)	(P1-2)	N	N	-	-	-	-5.36645	3.92138	Avg. QSAR	5	-5.36645	3.92138	5	1000000	EPI exp.	5	5.42598e+06	2.29144	8	1	B(exp)	-	-	-	2.21e-06	OECD exp.	1.77074e-12	EPI exp.
p77-93-0	CCOC(=O)C(CC(=O)OCC)(CC(=O)OCC)O	triethyl citrate	parent_chemical	276.288	organic	neutral	Unstable MOC	Unstable MOC	0	exp	5	0	Swater (EPI exp.)	1	B(exp)	1	B(exp)	0	(M4-5)	(P1-2)	(P3-4)	N	N	-	-	-	0.57089	0.400824	Avg. QSAR	5	0.57089	0.400824	5	65000	EPI exp.	5	43792.7	0.870411	8	1	B(exp)	4	Hydrowin	-	0.267123	OECD exp.	1.57035e-07	EPI exp.
p77-94-1,h77-90-7	CCCCOC(=O)C(CC(=O)OCCCC)(CC(=O)OCCCC)O	tributyl citrate	hydrolysis_product,parent_chemical	360.451	organic	neutral	Transient	Transient	0.57735	exp	3	0.57735	Swater (OECD & lit exp.)	1	B(exp)	1	B(exp)	0	(M2-3)	(P1-2)	(P3-4)	N	N	-	-	-	3.35374	0.383224	Avg. QSAR	2	3.35374	0.383224	5	102.7	OECD exp.	3	205.195	1.76864	8	1	B(exp)	4	OECD exp.	-	2.45046e-05	QSAR avg.	7.97492e-08	QSAR avg.
p77-99-6,h78-16-0,h682-09-7,h682-11-1,h3047-32-3,h3290-92-4,h5187-23-5,h15625-89-5,h23235-61-2,h25723-16-4,h28961-43-5,h50586-59-9,h57675-44-2,h66492-51-1,h67762-64-5,h68541-50-4,h94108-97-1	CCC(CO)(CO)CO	propylidynetrimethanol	hydrolysis_product,parent_chemical	134.176	organic	neutral	Unstable MOC	Unstable MOC	0		5	0	Doc (OECD & lit exp.)	1	B(QSAR)	1	B(QSAR)	0	(M4-5)	(P1-2)	(P1-2)	N	N	-	0.176	OECD exp.	-0.84272	0.793369	Avg. QSAR	5	-0.84272	0.793369	5	1000000	EPI exp.	5	1.62864e+06	1.19162	8	1	B(QSAR)	4	OECD exp.	-	0.0059717	OECD exp.	3.24294e-10	EPI exp.
p78-00-2	CC[Pb](CC)(CC)CC	tetraethyllead	parent_chemical	323.438	organo_metallic	neutral	Transient	Transient	1.35401		2	1.1547	Doc (PP-LFER)	1	H(OECD exp.)	1	V(EPI exp.) H(OECD exp.)	0.707107	(M2-3)	(P3-4)	(P3-4)	N	N	-	4.23704	PP-LFER	4.28583	2.10218	Avg. QSAR	2	4.28583	2.10218	4	9965.92	QSAR avg	4	9965.92	1.79419	6	4	B(QSAR)	1	OECD exp.	-	34.658	EPIwin Exp.	23.2281	EPI exp.
p78-04-6	CCCC[Sn]1(CCCC)OC(=O)C=CC(=O)O1	dibutyltin maleate	parent_chemical	346.98	organo_metallic	neutral	3	3	1.52753		2	0.57735	Swater (OECD & lit exp.)	3	B(QSAR)	3	B(QSAR)	1.41421	(M2-3)	(P3-4)	(P3-4)	N	N	-	-	-	3.2997	0.765367	Avg. QSAR	2	3.2997	0.765367	4	10	OECD exp.	3	441.987	1.69001	6	3	B(QSAR)	-	-	-	0.00026	OECD exp.	3.64126e-06	OECD exp.
p78-08-0	CCO[Si](OCC)(OCC)C=C	triethoxy(vinyl)silane	parent_chemical	190.316	organo_silane	neutral	3	Unstable MOC	1.41421		5	1.41421	Swater (Avg. QSAR)	2	B(QSAR)	1	V(QSAR avg.)	0	(M2-3)	(P1-2)	(P3-4)	N	N	-	-	-	2.31343	0.745142	Avg. QSAR	3	2.31343	0.745142	5	128647	QSAR avg	5	128647	2.50472	8	2	B(QSAR)	-	-	-	304	OECD exp.	0.00892358	QSAR avg.
p78-10-4	CCO[Si](OCC)(OCC)OCC	tetraethyl orthosilicate	parent_chemical	208.332	organo_silane	neutral	Unstable MOC	Unstable MOC	0.866025		4	0.5	Doc (PP-LFER)	1	H(LHC QSAR)	1	H(LHC QSAR)	0.707107	(M2-3)	(P3-4)	(P3-4)	N	N	-	1.51672	PP-LFER	2.05986	1.29142	Avg. QSAR	4	2.05986	1.29142	5	1490	OECD exp.	5	157101	2.36748	8	3	B(QSAR)	1	LHC QSAR	-	250.604	EPIwin Exp.	0.000139329	PP-LFER
p78-11-5	O=N(=O)OCC(CON(=O)=O)(CON(=O)=O)CON(=O)=O	pentaerithrityl tetranitrate	parent_chemical	316.139	organic	neutral	4	4	1.52753		2	1.52753	Swater (EPI exp.)	4	B(QSAR)	4	B(QSAR) V(QSAR avg.)	0	(M2-3)	(P3-4)	(P3-4)	N	N	-	-	-	2.04		OECD exp	2	3.32204	2.48514	5	43	EPI exp.	5	12112.6	2.60725	8	4	B(QSAR)	-	-	-	7.26485e-07	EPIwin Exp.	3.31625e-08	QSAR avg.
p78-16-0	CCCCCCC(=O)OCC(COC(=O)CCCCCC)(COC(=O)CCCCCC)CC	2-ethyl-2-[[(1-oxoheptyl)oxy]methyl]propane-1,3-diyl bisheptanoate	parent_chemical	470.695	organic	neutral	Transient	Transient	0.707107		2	0.707107	Swater (Avg. QSAR)	1	B(exp)	1	B(exp)	0	(M1)	(P3-4)	(P3-4)	N	N	-	-	-	8.20266	0.6621	Avg. QSAR	1	8.20266	0.6621	5	0.200617	QSAR avg	2	0.200617	1.89302	8	1	B(exp)	4	Hydrowin	-	1.22101e-06	QSAR avg.	9.47396e-06	QSAR avg.
p78-26-2	CCCC(CO)(CO)C	2-methyl-2-propylpropane-1,3-diol	parent_chemical	132.204	organic	neutral	Unstable MOC	Unstable MOC	0		5	0	Swater (Avg. QSAR)	1	B(QSAR)	1	B(QSAR)	0	(M4-5)	(P1-2)	(P1-2)	N	N	-	-	-	0.772712	0.308239	Avg. QSAR	5	0.772712	0.308239	5	66893.3	QSAR avg	5	66893.3	0.878284	8	1	B(QSAR)	-	-	-	0.527413	QSAR avg.	7.46438e-06	QSAR avg.
p78-27-3	C#CC1(O)CCCCC1	1-ethynylcyclohexanol	parent_chemical	124.184	organic	neutral	2	2	0.447214		4	0.447214	Doc (OECD & lit exp.)	2	B(QSAR)	2	B(QSAR) V(OECD exp.)	0	(M2-3)	(P1-2)	(P1-2)	N	N	-	1.51	OECD exp.	1.49		OECD exp	4	1.79724	0.448883	5	24500	OECD exp.	4	7508.89	0.659763	8	2	B(QSAR)	-	-	-	80	OECD exp.	0.000163668	OECD exp.
p78-40-0	CCOP(=O)(OCC)OCC	triethyl phosphate	parent_chemical	182.158	organic	neutral	Unstable MOC	Unstable MOC	0		5	0	Doc (PP-LFER)	1	B(QSAR)	1	B(QSAR)	0	(M4-5)	(P3-4)	(P3-4)	N	N	-	-0.2638	PP-LFER	0.8		lit exp.	5	0.867376	0.224893	4	500000	EPI exp.	5	53149.7	0.944342	6	1	B(QSAR)	4	OECD exp.	-	52.085	OECD exp.	2.11349e-06	Lit exp.
p78-42-2	CCCCC(COP(=O)(OCC(CCCC)CC)OCC(CCCC)CC)CC	tris(2-ethylhexyl) phosphate	parent_chemical	434.644	organic	neutral	3	3	1.41421		2	0	Swater (EPI exp.)	3	B(QSAR)	3	B(QSAR)	1.41421	(M1)	(P3-4)	(P3-4)	N	N	-	-	-	8.88418	0.578543	Avg. QSAR	1	8.88418	0.578543	4	0.6	EPI exp.	1	0.0841805	2.29912	6	3	B(QSAR)	4	Hydrowin	-	548.625	OECD exp.	3.21432e-06	EPI exp.
p78-51-3	CCCCOCCOP(=O)(OCCOCCCC)OCCOCCCC	tris(2-butoxyethyl) phosphate	parent_chemical	398.48	organic	neutral	4	4	2.17945		3	0.5	Doc (OECD & lit exp.)	4	B(QSAR) H(Hydrowin)	4	B(QSAR) V(OECD exp.) H(Hydrowin)	2.12132	(M2-3)	(P3-4)	(P3-4)	N	N	-	2.5	OECD exp.	3.44119	0.41088	Avg. QSAR	2	3.44119	0.41088	4	663.5	OECD exp.	3	469.901	1.11289	6	4	B(QSAR)	4	Hydrowin	-	1.96e-05	OECD exp.	4.75112e-09	OECD exp.
p78-59-1	CC1=CC(=O)CC(C1)(C)C	3,5,5-trimethylcyclohex-2-enone	parent_chemical	138.211	organic	neutral	2	2	0.57735		4	0.57735	Doc (OECD & lit exp.)	2	B(QSAR)	2	B(QSAR) V(EPI exp.)	0	(M2-3)	(P1-2)	(P1-2)	N	N	-	1.766	OECD exp.	2.30426	0.185506	Avg. QSAR	3	2.30426	0.185506	5	12000	EPI exp.	4	1569.9	0.803615	8	2	B(QSAR)	-	-	-	58	OECD exp.	0.00027154	EPI exp.
p78-63-7	CC(OOC(C)(C)C)(CCC(OOC(C)(C)C)(C)C)C	di-tert-butyl 1,1,4,4-tetramethyltetramethylene diperoxide	parent_chemical	290.446	organic	neutral	Immobile POC	Transient	0.57735		1	0.57735	Doc (OECD & lit exp.)	4	B(QSAR)	1	V(QSAR avg.)	0	(M1)	(P3-4)	(P3-4)	N	N	-	4.72	OECD exp.	4.99148	1.22492	Avg. QSAR	1	4.99148	1.22492	5	45.9648	QSAR avg	2	45.9648	2.54309	8	4	B(QSAR)	-	-	-	1.40419	QSAR avg.	0.0606174	QSAR avg.
p78-67-1	N#CC(N=NC(C#N)(C)C)(C)C	2,2'-dimethyl-2,2'-azodipropiononitrile	parent_chemical	164.211	organic	neutral	4.5	2	1.09545	exp	4	0.83666	Doc (OECD & lit exp.)	4	B(exp) H(OECD exp.)	2	V(OECD exp.)	0.707107	(M2-3)	(P3-4)	(P3-4)	N	N	-	2	OECD exp.	1.1		OECD exp	4	1.99326	0.581047	5	350	OECD exp.	5	14491.1	2.31748	8	4	B(exp)	4	OECD exp.	-	0.81	OECD exp.	0.000153389	OECD exp.
p78-69-3	CCC(CCCC(C)C)(O)C	3,7-dimethyloctan-3-ol	parent_chemical	158.286	organic	neutral	Unstable MOC	Unstable MOC	0.816497	exp	4	0.816497	Doc (OECD & lit exp.)	1	B(exp)	1	B(exp) V(QSAR avg.)	0	(M2-3)	(P1-2)	(P1-2)	N	N	-	1.75	OECD exp.	3.44193	0.220036	Avg. QSAR	2	3.44193	0.220036	5	320	OECD exp.	3	257.467	0.404731	8	1	B(exp)	-	-	-	11.9345	QSAR avg.	0.00281084	QSAR avg.
p78-70-6,h115-95-7	C=CC(CCC=C(C)C)(O)C	linalool	hydrolysis_product,parent_chemical	154.254	organic	neutral	2	Unstable MOC	0.5		4	0.5	Doc (PP-LFER)	2	B(QSAR)	1	V(EPI exp.)	0	(M2-3)	(P1-2)	(P1-2)	N	N	-	1.53596	PP-LFER	2.84		OECD exp	3	2.996	0.337264	5	1590	EPI exp.	3	664.985	0.409988	8	2	B(QSAR)	-	-	-	21.328	EPIwin Exp.	0.000879234	EPI exp.
p78-77-3	BrCC(C)C	1-bromo-2-methylpropane	parent_chemical	137.025	organic	neutral	2	Unstable MOC	0.912871		4	0.57735	Doc (PP-LFER)	2	B(QSAR) H(LHC QSAR)	1	V(Lit exp.)	0.707107	(M2-3)	(P1-2)	(P1-2)	N	N	-	1.8714	PP-LFER	2.53		lit exp.	3	2.38293	0.189434	5	507	EPI exp.	4	1478.95	0.634396	8	2	B(QSAR)	2	LHC QSAR	-	9200	Lit. Exp.	0.954993	Lit exp.
p78-78-4	CCC(C)C	2-methylbutane	parent_chemical	72.1511	organic	neutral	Transient	Transient	0.5		3	0.5	Doc (PP-LFER)	1	B(exp)	1	B(exp) V(Lit exp.)	0	(M2-3)	(P1-2)	(P1-2)	N	N	-	2.08262	PP-LFER	2.83369	0.380123	Avg. QSAR	3	2.83369	0.380123	5	48.5	OECD exp.	3	884.91	2.17512	8	1	B(exp)	-	-	-	91700	Lit. Exp.	56.2341	Lit exp.
p78-79-5	C=CC(=C)C	isoprene	parent_chemical	68.1193	organic	neutral	Unstable MOC	Unstable MOC	0.5		4	0.5	Doc (PP-LFER)	1	B(QSAR)	1	B(QSAR) V(Lit exp.)	0	(M2-3)	(P1-2)	(P1-2)	N	N	-	1.46754	PP-LFER	2.19794	0.324382	Avg. QSAR	4	2.19794	0.324382	5	642	OECD exp.	4	2328.52	1.25728	8	1	B(QSAR)	-	-	-	73400	Lit. Exp.	2.98538	Lit exp.
p78-83-1,h78-77-3,h84-69-5,h97-86-9,h106-63-8,h110-19-0,h126-71-6,h2253-52-3,h14234-82-3,h33021-02-2,h34432-92-3,h52937-90-3,h70969-58-3,h83261-15-8,h109232-37-3,h268567-32-4	OCC(C)C	2-methylpropan-1-ol	hydrolysis_product,parent_chemical	74.1235	organic	neutral	Unstable MOC	Unstable MOC	0	exp	5	0	Doc (OECD & lit exp.)	1	B(exp)	1	B(exp) V(OECD exp.)	0	(M4-5)	(P1-2)	(P1-2)	N	N	-	0.31	OECD exp.	1		OECD exp	5	0.754986	0.065417	5	70000	OECD exp.	5	75767.6	0.460126	8	1	B(exp)	-	-	-	1375	OECD exp.	0.000587671	OECD exp.
p78-84-2,h5417-35-6,h35113-48-5,h42031-28-7,h54914-37-3,h92671-67-5,h123599-82-6,h128286-13-5,h173904-11-5,h188199-50-0	O=CC(C)C	isobutyraldehyde	hydrolysis_product,parent_chemical	72.1076	organic	neutral	Unstable MOC	Unstable MOC	0	exp	5	0	Doc (OECD & lit exp.)	1	B(exp)	1	B(exp) V(Lit exp.)	0	(M4-5)	(P1-2)	(P1-2)	N	N	-	0.631	OECD exp.	0.794728	0.104524	Avg. QSAR	5	0.794728	0.104524	5	89000	EPI exp.	5	58202.7	0.677382	8	1	B(exp)	-	-	-	23065	OECD exp.	0.00794328	Lit exp.
p78-86-4	CCC(Cl)C	2-chlorobutane	parent_chemical	92.5691	organic	neutral	2	Unstable MOC	0.57735		4	0.57735	Doc (PP-LFER)	2	B(QSAR)	1	V(Lit exp.)	0	(M2-3)	(P1-2)	(P1-2)	N	N	-	1.6018	PP-LFER	2.72		OECD exp	3	2.28615	0.16895	5	1000	EPI exp.	4	1757.55	0.664509	8	2	B(QSAR)	3	LHC QSAR	-	20210	OECD exp.	1	Lit exp.
p78-87-5	ClCC(Cl)C	1,2-dichloropropane	parent_chemical	112.987	organic	neutral	2	Unstable MOC	0.447214		4	0.447214	Doc (PP-LFER)	2	B(QSAR)	1	V(OECD exp.) PT(exp.)	0	(M2-3)	(P3-4)	(P1-2)	N	N	-	1.29744	PP-LFER	2.25		OECD exp	4	1.99927	0.158386	5	2700	OECD exp.	4	2293.75	0.257201	8	2	B(QSAR)	4	OECD exp.	1	6775	OECD exp.	0.0933615	OECD exp.
p78-88-6	ClCC(=C)Cl	2,3-dichloropropene	parent_chemical	110.971	organic	neutral	Unstable MOC	Unstable MOC	0		4	0	Swater (EPI exp.)	1	H(LHC QSAR)	1	V(EPI exp.) H(LHC QSAR)	0	(M2-3)	(P3-4)	(P1-2)	N	N	-	-	-	2.03064	0.256898	Avg. QSAR	4	2.03064	0.256898	5	2150	EPI exp.	4	2750.74	0.673728	8	2	B(QSAR)	1	LHC QSAR	-	8157.96	EPIwin Exp.	0.170122	EPI exp.
p78-90-0,h94-91-7,h140391-39-5	NCC(N)C	propylenediamine	hydrolysis_product,parent_chemical	74.1264	organic	ionizable	Unstable MOC	Unstable MOC	0		5	0	Swater (Avg. QSAR)	1	B(QSAR)	1	B(QSAR)	0	(M4-5)	(P1-2)	(P1-2)	B	9.66	Exp (OECD (average))	-	-	-3.24116	2.2179	Avg. QSAR	5	-5.50516	2.0296	5	4.56096e+11	QSAR avg	5	4.56096e+11	1.44763	8	1	B(QSAR)	-	-	-	1412.98	EPIwin Exp.	1.82566e-07	QSAR avg.
p78-92-2,h78-86-4,h17462-58-7,h17696-64-9	CCC(O)C	butan-2-ol	hydrolysis_product,parent_chemical	74.1235	organic	neutral	Unstable MOC	Unstable MOC	0		5	0	Doc (PP-LFER)	1	B(QSAR)	1	B(QSAR) V(Lit exp.)	0	(M4-5)	(P1-2)	(P1-2)	N	N	-	-0.20208	PP-LFER	0.66	0.0707107	lit exp.	5	0.758542	0.103087	5	125000	EPI exp.	5	84634.2	0.484909	8	1	B(QSAR)	-	-	-	2320	Lit. Exp.	0.00040738	Lit exp.
p78-93-3,h96-29-7,h34206-40-1	CCC(=O)C	butanone	hydrolysis_product,parent_chemical	72.1076	organic	neutral	Unstable MOC	Unstable MOC	0	exp	5	0	Doc (OECD & lit exp.)	1	B(exp)	1	B(exp) V(OECD exp.)	0	(M4-5)	(P1-2)	(P1-2)	N	N	-	0.6542	OECD exp.	0.29	0	lit exp.	5	0.547923	0.207955	5	353000	OECD exp.	5	73720.1	0.5686	8	1	B(exp)	-	-	-	12080	OECD exp.	0.000995971	OECD exp.
p78-95-5,h921-03-9	CC(=O)CCl	chloroacetone	hydrolysis_product,parent_chemical	92.5255	organic	neutral	3	Unstable MOC	0.707107	exp	5	0	Swater (EPI exp.)	2	B(QSAR) H(OECD exp.)	1	V(EPI exp.)	0.707107	(M4-5)	(P1-2)	(P1-2)	N	N	-	-	-	0.342111	0.225928	Avg. QSAR	5	0.342111	0.225928	5	90000	EPI exp.	5	91768.2	0.777711	8	2	B(QSAR)	2	OECD exp.	-	1599.6	EPIwin Exp.	0.000674761	EPI exp.
p78-96-6,s169115-74-6,h75-55-8,h111-05-7	CC(CN)O	1-aminopropan-2-ol:Carbamic acid, (2-hydroxypropyl)-, compd. with 1-amino-2-propanol (1:1)	hydrolysis_product,parent_chemical,salt_or_mixture_component	75.1111	organic	ionizable	Unstable MOC	Unstable MOC	0	exp	5	0	Doc (OECD & lit exp.)	1	B(exp)	1	B(exp)	0	(M4-5)	(P1-2)	(P1-2)	B	9.62667	Exp (OECD (average))	-5.13667	OECD exp.	-8.12667		OECD exp	5	-4.36448	2.36204	5	1000000	EPI exp.	5	4.49492e+11	1.37208	8	1	B(exp)	-	-	-	63	OECD exp.	1.21469e-07	QSAR avg.
p78-97-7	CC(C#N)O	lactonitrile	parent_chemical	71.0792	organic	neutral	Unstable MOC	Unstable MOC	0		5	0	Swater (Avg. QSAR)	1	B(exp) H(OECD exp.)	1	B(exp) H(OECD exp.)	0	(M4-5)	(P1-2)	(P1-2)	N	N	-	-	-	-0.686443	0.459772	Avg. QSAR	5	-0.686443	0.459772	5	525727	QSAR avg	5	525727	0.845235	8	1	B(exp)	1	OECD exp.	-	15.9	OECD exp.	0.000200786	QSAR avg.
p78-98-8	O=CC(=O)C	pyruvaldehyde	parent_chemical	72.064	organic	neutral	Unstable MOC	Unstable MOC	0		5	0	Swater (Avg. QSAR)	1	B(exp)	1	B(exp)	0	(M4-5)	(P1-2)	(P1-2)	N	N	-	-	OECD exp.	-0.578543	0.624197	Avg. QSAR	5	-0.578543	0.624197	5	920238	QSAR avg	5	920238	1.5093	8	1	B(exp)	-	-	-	3399	OECD exp.	1.10415e-05	EPI exp.
p79-00-5	ClCC(Cl)Cl	1,1,2-trichloroethane	parent_chemical	133.405	organic	neutral	4.5	Unstable MOC	0		4	0	Doc (OECD & lit exp.)	3	B(QSAR)	1	V(Lit exp.)	0	(M2-3)	(P3-4)	(P1-2)	N	N	-	1.72	OECD exp.	1.89	0	lit exp.	4	1.97647	0.155895	5	3500	OECD exp.	4	2407.13	0.582923	8	3	B(QSAR)	4	Hydrowin	-	3100	Lit. Exp.	0.0346737	Lit exp.
p79-01-6	ClC=C(Cl)Cl	trichloroethylene	parent_chemical	131.389	organic	neutral	4	Transient	0.547723		3	0.547723	Doc (OECD & lit exp.)	3	B(QSAR)	1	V(OECD exp.)	0	(M2-3)	(P3-4)	(P1-2)	N	N	-	2.15	OECD exp.	2.53		OECD exp	3	2.34855	0.399854	5	1100	OECD exp.	4	1042.89	0.588535	8	3	B(QSAR)	4	OECD exp.	4	9900	OECD exp.	0.477283	OECD exp.
p79-03-8	CCC(=O)Cl	propionyl chloride	parent_chemical	92.5255	organic	neutral	Unstable MOC	Unstable MOC	0.707107		5	0	Swater (Avg. QSAR)	1	H(LHC QSAR)	1	V(QSAR avg.) H(LHC QSAR)	0.707107	(M4-5)	(P1-2)	(P1-2)	N	N	-	-	-	0.805087	0.474581	Avg. QSAR	5	0.805087	0.474581	5	51089.2	QSAR avg	5	51089.2	1.05241	8	2	B(QSAR)	1	LHC QSAR	-	14871.3	QSAR avg.	0.0368262	QSAR avg.
p79-04-9,h79-36-7	ClCC(=O)Cl	chloroacetyl chloride	hydrolysis_product,parent_chemical	112.944	organic	neutral	Unstable MOC	Unstable MOC	0		5	0	Doc (OECD & lit exp.)	1	H(LHC QSAR)	1	V(QSAR avg.) H(LHC QSAR)	0	(M4-5)	(P1-2)	(P1-2)	N	N	-	0.079	OECD exp.	0.618337	0.475883	Avg. QSAR	5	0.618337	0.475883	5	62311.7	QSAR avg	5	62311.7	1.19568	8	2	B(QSAR)	1	LHC QSAR	-	3338.3	OECD exp.	0.00754512	QSAR avg.
p79-06-1,h107-13-1	NC(=O)C=C	acrylamide	hydrolysis_product,parent_chemical	71.0792	organic	neutral	Unstable MOC	Unstable MOC	0	exp	5	0	Swater (EPI exp.)	1	B(exp)	1	B(exp)	0	(M4-5)	(P1-2)	(P1-2)	N	N	-	-	-	-0.9		OECD exp	5	-0.617081	0.40334	5	390000	EPI exp.	5	271996	1.25836	8	1	B(exp)	-	-	-	0.9	OECD exp.	6.95209e-08	EPI exp.
p79-07-2	CC(=O)NCl	2-chloroacetamide	parent_chemical	93.5132	organic	ionizable	Unstable MOC	Unstable MOC	0	exp	5	0	Doc (OECD & lit exp.)	1	B(exp)	1	B(exp)	0	(M4-5)	(P1-2)	(P1-2)	A	5.80393	QSAR (SPARC)	-3.1961	OECD exp.	-4.8261		OECD exp	5	-2.5598	2.52508	5	5.10761e+09	QSAR avg	5	5.10761e+09	1.4267	8	1	B(exp)	4	OECD exp.	-	0.48	OECD exp.	4.51405e-06	QSAR avg.
p79-08-3,h96-32-2	OC(=O)CBr	bromoacetic acid	hydrolysis_product,parent_chemical	138.954	organic	ionizable	Unstable MOC	Unstable MOC	0	exp	5	0	Swater (EPI exp.)	1	B(exp)	1	B(exp)	0	(M4-5)	(P1-2)	(P1-2)	A	3.3	Exp (OECD)	-	-	-6.695		OECD exp	5	-3.82701	2.63163	5	1750000	EPI exp.	5	5.06993e+11	1.05455	8	1	B(exp)	4	OECD exp.	-	20.2	OECD exp.	2.66633e-07	EPI exp.
p79-09-4,h79-03-8,h122-63-4,h123-62-6,h535-13-7,h624-54-4,h931-36-2,h5534-13-4,h7069-42-3,h17639-93-9,h42558-54-3,h59113-36-9,h68912-13-0,h83261-15-8,h106006-84-2,h123599-82-6,h141773-73-1,h144900-34-5,h236391-76-7	CCC(=O)O	propionic acid	hydrolysis_product,parent_chemical	74.0799	organic	ionizable	Unstable MOC	Unstable MOC	0		5	0	Doc (PP-LFER)	1	B(QSAR)	1	B(QSAR)	0	(M4-5)	(P1-2)	(P1-2)	A	4.87333	Exp (OECD (average))	-5.53487	PP-LFER	-4.81167	0.0212132	lit exp.	5	-3.31469	1.78967	5	1000000	EPI exp.	5	1.55529e+10	0.974116	8	1	B(QSAR)	-	-	-	520	OECD exp.	1.8197e-05	Lit exp.
p79-10-7,h79-06-1,h96-33-3,h103-11-7,h106-63-8,h107-13-1,h107-58-4,h140-88-5,h141-32-2,h818-61-1,h924-42-5,h959-52-4,h1330-61-6,h1663-39-4,h2156-97-0,h2210-24-4,h2439-35-2,h2478-10-6,h2680-03-7,h2873-97-4,h3121-61-7,h3845-76-9,h4223-03-4,h4813-57-4,h5888-33-5,h7646-67-5,h12542-30-2,h13048-33-4,h13402-02-3,h13641-96-8,h15214-89-8,h15625-89-5,h17527-29-6,h18299-85-9,h21643-42-5,h25584-83-2,h28961-4…	OC(=O)C=C	acrylic acid	hydrolysis_product,parent_chemical	72.064	organic	ionizable	Unstable MOC	Unstable MOC	0	exp	5	0	Doc (OECD & lit exp.)	1	B(exp)	1	B(exp)	0	(M4-5)	(P1-2)	(P1-2)	A	4.255	Exp (OECD average)	-4.965	OECD exp.	-1.02528	1.54893	Avg. QSAR	5	-3.32328	1.90937	5	1000000	EPI exp.	5	2.84972e+10	1.10562	8	1	B(exp)	4	OECD exp.	-	529	OECD exp.	1.5131e-05	EPI exp.
p79-11-8,h79-04-9,h96-34-4,h105-39-5,h3910-51-8,h15308-01-7,h17696-64-9,h21535-43-3,h67442-07-3	OC(=O)CCl	chloroacetic acid	hydrolysis_product,parent_chemical	94.4979	organic	ionizable	Unstable MOC	Unstable MOC	0	exp	5	0	Doc (OECD & lit exp.)	1	B(exp) H(LHC QSAR)	1	B(exp) H(LHC QSAR)	0	(M4-5)	(P1-2)	(P1-2)	A	2.8	Exp (OECD)	-7.121	OECD exp.	-6.98		lit exp.	5	-4.12811	2.88627	5	858000	EPI exp.	5	2.10148e+12	1.06995	8	1	B(exp)	1	LHC QSAR	-	8.7	OECD exp.	3.78684e-07	EPI exp.
p79-14-1,h79-04-9,h79-08-3,h79-11-8,h96-32-2,h96-34-4,h105-39-5,h125-65-5,h625-45-6,h7397-62-8,h17696-64-9,h29518-11-4,h35877-42-0,h54041-17-7,h60924-38-1,h75302-98-6,h150928-21-5,h236391-76-7,h246035-38-1,h371921-34-5,h379268-96-9,h438056-69-0,h446292-04-2,h446292-07-5,h446292-08-6,h1307233-94-8	OCC(=O)O	glycollic acid	hydrolysis_product,parent_chemical	76.0523	organic	ionizable	Unstable MOC	Unstable MOC	0	exp	5	0	Doc (OECD & lit exp.)	1	B(exp)	1	B(exp)	0	(M4-5)	(P1-2)	(P1-2)	A	3.1	Exp (OECD)	-5.5	OECD exp.	-2.6196	1.28477	Avg. QSAR	5	-5.3796	2.99742	5	2.38299e+12	OECD exp.	5	5.15778e+12	1.109	8	1	B(exp)	-	-	-	0.41	OECD exp.	4.19516e-08	OECD exp.
p79-16-3	CNC(=O)C	N-methylacetamide	parent_chemical	73.0952	organic	neutral	Unstable MOC	Unstable MOC	0		5	0	Swater (EPI exp.)	1	B(QSAR)	1	B(QSAR)	0	(M4-5)	(P1-2)	(P1-2)	N	N	-	-	-	-1.05		lit exp.	5	-0.78606	0.206711	5	1000000	EPI exp.	5	488072	0.771434	8	1	B(QSAR)	-	-	4	58.652	EPIwin Exp.	1.72984e-06	EPI exp.
p79-20-9,h96-32-2,h96-34-4	COC(=O)C	methyl acetate	hydrolysis_product,parent_chemical	74.0799	organic	neutral	Unstable MOC	Unstable MOC	0	exp	5	0	Doc (OECD & lit exp.)	1	B(exp)	1	B(exp) V(Lit exp.)	0	(M4-5)	(P1-2)	(P1-2)	N	N	-	0.18	OECD exp.	0.18	0	lit exp.	5	0.124881	0.210892	5	243000	EPI exp.	5	126724	0.609826	8	1	B(exp)	4	Hydrowin	-	28800	Lit. Exp.	0.00501187	Lit exp.
p79-21-0	CC(=O)OO	peracetic acid	parent_chemical	76.0523	organic	ionizable	Unstable MOC	Unstable MOC	0	exp	5	0	Swater (EPI exp.)	1	B(exp) H(Hydrowin)	1	B(exp) H(Hydrowin)	0	(M4-5)	(P1-2)	(P1-2)	A	8.24	Exp (OECD)	-	-	-1.25474	0.949617	Avg. QSAR	5	-1.96173	0.941041	5	1000000	EPI exp.	5	2.00684e+07	0.943899	8	1	B(exp)	1	Hydrowin	-	1932.85	EPIwin Exp.	8.75145e-05	EPI exp.
p79-22-1	COC(=O)Cl	methyl chloroformate	parent_chemical	94.4979	organic	neutral	Unstable MOC	Unstable MOC	0.707107		5	0	Doc (OECD & lit exp.)	1	H(LHC QSAR)	1	V(QSAR avg.) H(LHC QSAR)	0.707107	(M4-5)	(P1-2)	(P1-2)	N	N	-	0.631	OECD exp.	0.682715	0.353875	Avg. QSAR	5	0.682715	0.353875	5	72211.4	QSAR avg	5	72211.4	0.913506	8	2	B(QSAR)	1	LHC QSAR	-	14470	OECD exp.	0.0617222	QSAR avg.
p79-24-3	CCN(=O)=O	nitroethane	parent_chemical	75.0675	organic	ionizable	Unstable MOC	Unstable MOC	0		5	0	Doc (PP-LFER)	1	B(QSAR)	1	B(QSAR) V(Lit exp.)	0	(M2-3)	(P3-4)	(P3-4)	A	8.46	Exp (CRC)	-1.59239	PP-LFER	-1.37235	0	lit exp.	5	-0.526599	0.741554	5	48000	EPI exp.	5	1.15538e+06	0.656886	8	1	B(QSAR)	-	-	-	2773.05	OECD exp.	0.00190546	Lit exp.
p79-30-1	CC(C(=O)Cl)C	isobutyryl chloride	parent_chemical	106.553	organic	neutral	Unstable MOC	Unstable MOC	0.912871		5	0.57735	Doc (OECD & lit exp.)	1	H(LHC QSAR)	1	V(QSAR avg.) H(LHC QSAR)	0.707107	(M4-5)	(P1-2)	(P1-2)	N	N	-	0.656	OECD exp.	1.24827	0.511864	Avg. QSAR	4	1.24827	0.511864	5	24322.8	QSAR avg	5	24322.8	1.14664	8	2	B(QSAR)	1	LHC QSAR	-	8723.57	QSAR avg.	0.0578701	QSAR avg.
p79-31-2,h79-30-1,h97-72-3,h103-60-6,h109-13-7,h126-13-6,h3437-84-1,h6846-50-0,h16883-83-3,h25265-77-4,h42558-54-3,h52698-46-1,h423165-13-3,h860035-07-0,h860035-10-5,h1247119-36-3	CC(C(=O)O)C	isobutyric acid	hydrolysis_product,parent_chemical	88.107	organic	ionizable	Unstable MOC	Unstable MOC	0		5	0	Doc (OECD & lit exp.)	1	B(QSAR)	1	B(QSAR)	0	(M4-5)	(P1-2)	(P1-2)	A	5	Exp (OECD)	-3.35	OECD exp.	-0.794969	1.59077	Avg. QSAR	5	-2.79497	1.57557	5	167000	EPI exp.	5	5.09171e+09	1.1436	8	1	B(QSAR)	-	-	-	241.273	EPIwin Exp.	3.61917e-05	EPI exp.
p79-36-7	ClC(=O)C(Cl)Cl	dichloroacetyl chloride	parent_chemical	147.389	organic	neutral	Unstable MOC	Unstable MOC	0		5	0	Doc (OECD & lit exp.)	1	H(LHC QSAR)	1	V(QSAR avg.) H(LHC QSAR)	0	(M4-5)	(P3-4)	(P1-2)	N	N	-	0.278	OECD exp.	1.16592	0.684243	Avg. QSAR	5	1.16592	0.684243	5	34326.1	QSAR avg	5	34326.1	1.40562	8	3	B(QSAR)	1	LHC QSAR	-	3061.66	OECD exp.	0.00680215	QSAR avg.
p79-37-8	ClC(=O)C(=O)Cl	oxalyl dichloride	parent_chemical	126.927	organic	neutral	3	Unstable MOC	0.707107		5	0	Swater (Avg. QSAR)	2	B(QSAR)	1	V(QSAR avg.)	0.707107	(M4-5)	(P1-2)	(P1-2)	N	N	-	-	-	0.12333	1.1013	Avg. QSAR	5	0.12333	1.1013	5	184849	QSAR avg	5	184849	1.96894	8	2	B(QSAR)	-	-	-	16648.9	QSAR avg.	0.00356278	QSAR avg.
p79-38-9	FC(=C(F)F)Cl	chlorotrifluoroethylene	parent_chemical	116.47	organic	neutral	2	Unstable MOC	0		4	0	Swater (Avg. QSAR)	2	B(QSAR)	1	V(QSAR avg.)	0	(M4-5)	(P3-4)	(P1-2)	N	N	-	-	-	1.8298	0.268106	Avg. QSAR	4	1.8298	0.268106	5	3101.96	QSAR avg	4	3101.96	0.838018	8	2	B(QSAR)	-	-	-	612000	OECD exp.	13.4274	QSAR avg.
p79-39-0,h126-98-7	CC(=C)C(=O)N	methacrylamide	hydrolysis_product,parent_chemical	85.1063	organic	neutral	Unstable MOC	Unstable MOC	0		5	0	Swater (OECD & lit exp.)	1	B(QSAR)	1	B(QSAR)	0	(M4-5)	(P1-2)	(P1-2)	N	N	-	-	-	-0.194946	0.413304	Avg. QSAR	5	-0.194946	0.413304	5	202000	OECD exp.	5	274208	1.3396	8	1	B(QSAR)	-	-	-	0.013	OECD exp.	2.21069e-09	OECD exp.
p79-41-4,h79-39-0,h80-62-6,h96-05-9,h97-63-2,h97-86-9,h97-88-1,h97-90-5,h101-43-9,h106-91-2,h109-16-0,h126-98-7,h142-90-5,h585-07-9,h688-84-6,h760-93-0,h868-77-9,h923-02-4,h1189-08-8,h2082-81-7,h2144-53-8,h2495-27-4,h2495-37-6,h2549-53-3,h2867-47-2,h3179-47-3,h3290-92-4,h3775-90-4,h5205-93-6,h7328-22-5,h7534-94-3,h13749-61-6,h16613-04-0,h21282-97-3,h27813-02-1,h29964-84-9,h30674-80-7,h32360-05-7,…	CC(=C)C(=O)O	methacrylic acid	hydrolysis_product,parent_chemical	86.091	organic	ionizable	Unstable MOC	Unstable MOC	0		5	0	Doc (PP-LFER)	1	B(exp)	1	B(exp)	0	(M4-5)	(P1-2)	(P1-2)	A	4.02058	QSAR (SPARC)	-5.78262	PP-LFER	-0.690917	1.7262	Avg. QSAR	5	-3.08268	1.90979	5	89000	EPI exp.	5	1.98798e+10	0.843899	8	1	B(exp)	-	-	-	131.967	EPIwin Exp.	1.57412e-05	OECD exp.
p79-44-7	CN(C(=O)Cl)C	dimethylcarbamoyl chloride	parent_chemical	107.54	organic	neutral	3	Unstable MOC	0.707107		5	0	Swater (Avg. QSAR)	2	B(QSAR)	1	V(QSAR avg.)	0.707107	(M4-5)	(P3-4)	(P3-4)	N	N	-	-	-	0.23325	0.551376	Avg. QSAR	5	0.23325	0.551376	5	276357	QSAR avg	5	276357	1.29647	8	2	B(QSAR)	-	-	-	259.935	EPIwin Exp.	0.000841036	QSAR avg.
p79-46-9	CC(N(=O)=O)C	2-nitropropane	parent_chemical	89.0946	organic	ionizable	3	Unstable MOC	0.707107		5	0	Doc (PP-LFER)	2	B(QSAR)	1	V(Lit exp.)	0.707107	(M2-3)	(P3-4)	(P3-4)	A	8.06647	QSAR (SPARC)	-1.66476	PP-LFER	-1.26356	0.176777	lit exp.	5	-0.281148	0.798847	5	17000	EPI exp.	5	910789	0.655067	8	2	B(QSAR)	-	-	-	2303	OECD exp.	0.00501187	Lit exp.
p79-74-3	CCC(c1cc(O)c(cc1O)C(CC)(C)C)(C)C	2,5-di-tert-pentylhydroquinone	parent_chemical	250.384	organic	ionizable	3	3	0.707107		2	0.707107	Swater (Avg. QSAR)	3	B(QSAR)	3	B(QSAR)	0	(M2-3)	(P3-4)	(P3-4)	A	11.2313	QSAR (SPARC)	-	-	5.14624	0.42413	Avg. QSAR	1	5.13633	0.421127	5	28.3725	QSAR avg	2	28.3725	1.28187	8	3	B(QSAR)	-	-	-	3.66001e-05	QSAR avg.	2.46082e-08	QSAR avg.
p79-77-6,p14901-07-6	CC(=O)/C=C/C1=C(C)CCCC1(C)C	(E)-4-(2,6,6-trimethyl-1-cyclohexen-1-yl)-3-buten-2-one:4-(2,6,6-trimethylcyclohex-1-ene-1-yl)-but-3-ene-2-one	parent_chemical	192.303	organic	neutral	1	Transient	0.57735		3	0.57735	Doc (OECD & lit exp.)	2	B(QSAR)	1	V(OECD exp.)	0	(M2-3)	(P1-2)	(P1-2)	N	N	-	2.8	OECD exp.	3.73799	0.47205	Avg. QSAR	2	3.73799	0.47205	5	110	OECD exp.	2	41.6047	0.726162	8	2	B(QSAR)	-	-	-	7.2	OECD exp.	0.00508042	OECD exp.
p79-81-2	CCCCCCCCCCCCCCCC(=O)OCC=C(C=CC=C(C=CC1=C(C)CCCC1(C)C)C)C	retinyl palmitate	parent_chemical	524.877	organic	neutral	Immobile POC	Transient	0.707107		1	0	Doc (OECD & lit exp.)	3	B(QSAR)	1	V(QSAR avg.)	0.707107	(M1)	(P3-4)	(P3-4)	N	N	-	9.002	OECD exp.	13.1413	1.67915	Avg. QSAR	1	13.1413	1.67915	5	0.00655258	QSAR avg	1	0.00655258	2.57448	8	3	B(QSAR)	4	OECD exp.	-	7.66475e-08	QSAR avg.	8.17894	QSAR avg.
p79-92-5	C=C1C2CCC(C1(C)C)C2	camphene	parent_chemical	136.239	organic	neutral	Transient	Transient	0.5		2	0.5	Doc (OECD & lit exp.)	2	B(QSAR)	1	V(PP-LFER)	0	(M2-3)	(P1-2)	(P1-2)	N	N	-	3.081	OECD exp.	4.22		OECD exp	2	3.81404	0.87553	5	4.6	EPI exp.	3	83.5575	2.15811	8	2	B(QSAR)	-	-	-	333.165	OECD exp.	0.68018	PP-LFER
p79-94-7	CC(c1cc(Br)c(c(c1)Br)O)(c1cc(Br)c(c(c1)Br)O)C	2,2',6,6'-tetrabromo-4,4'-isopropylidenediphenol	parent_chemical	543.897	organic	ionizable	Immobile POC	Immobile POC	2.3094		1	2.3094	Doc (PP-LFER)	4	B(QSAR)	4	B(QSAR) V(PP-LFER)	0	(M2-3)	(P1-2)	(P1-2)	A	9.4	Exp (OECD average)	5.29248	PP-LFER	5.13521	2.30347	Avg. QSAR	1	4.85628	1.97338	5	12737.2	QSAR avg	5	12737.2	2.18977	8	4	B(QSAR)	-	-	-	1.25812e-08	QSAR avg.	9.84628e-10	PP-LFER
p80-04-6	OC1CCC(CC1)C(C1CCC(CC1)O)(C)C	4,4'-isopropylidenedicyclohexanol	parent_chemical	240.388	organic	neutral	Transient	Transient	0.5		3	0.5	Doc (OECD & lit exp.)	1	B(QSAR)	1	B(QSAR)	0	(M1)	(P1-2)	(P1-2)	N	N	-	2.1	OECD exp.	3.32526	0.707555	Avg. QSAR	2	3.32526	0.707555	5	192	OECD exp.	3	201.975	1.22811	8	1	B(QSAR)	4	OECD exp.	-	0.00088	OECD exp.	4.44702e-07	OECD exp.
p80-05-7,h5945-33-5	CC(c1ccc(cc1)O)(c1ccc(cc1)O)C	4,4'-isopropylidenediphenol	hydrolysis_product,parent_chemical	228.293	organic	ionizable	Transient	Transient	1	exp	3	0.707107	Doc (OECD & lit exp.)	1	B(exp)	1	B(exp) PT(exp.)	0.707107	(M2-3)	(P1-2)	(P1-2)	A	9.77999	QSAR (SPARC)	2.34985	OECD exp.	1.77518		OECD exp	2	3.48503	0.359627	5	845.757	OECD exp.	3	378.007	0.563056	8	1	B(exp)	-	-	1	4.12e-07	OECD exp.	1.19381e-10	OECD exp.	Bisphenol A; BPA
p80-07-9	Clc1ccc(cc1)S(=O)(=O)c1ccc(cc1)Cl	bis(4-chlorophenyl) sulphone	parent_chemical	287.166	organic	neutral	4	4	0	exp	2	0	Doc (OECD & lit exp.)	4	B(QSAR) H(OECD exp.)	4	B(QSAR) V(QSAR avg.) H(OECD exp.)	0	(M1)	(P3-4)	(P3-4)	N	N	-	3.5	OECD exp.	3.9		OECD exp	2	3.86875	0.405213	5	11.357	QSAR avg	2	11.357	1.67219	8	4	B(QSAR)	4	OECD exp.	-	1.5e-05	OECD exp.	2.8417e-06	QSAR avg.
p80-08-0	Nc1ccc(cc1)S(=O)(=O)c1ccc(cc1)N	dapsone	parent_chemical	248.305	organic	ionizable	4.5	4.5	1		4	1	Doc (OECD & lit exp.)	4	B(QSAR)	4	B(QSAR) V(QSAR avg.)	0	(M2-3)	(P3-4)	(P3-4)	B	2.08474	QSAR (SPARC)	1.75475	OECD exp.	1.12167	0.267456	Avg. QSAR	5	1.11957	0.268666	5	380	EPI exp.	3	850.54	1.46262	8	4	B(QSAR)	-	-	-	1.78623e-06	QSAR avg.	6.37504e-13	QSAR avg.
p80-09-1	Oc1ccc(cc1)S(=O)(=O)c1ccc(cc1)O	4,4'-sulphonyldiphenol	parent_chemical	250.274	organic	ionizable	5	5	0.707107		5	0	Doc (OECD & lit exp.)	3	B(QSAR)	3	B(QSAR)	0.707107	(M4-5)	(P1-2)	(P1-2)	A	8	Exp (OECD)	-0.254321	OECD exp.	-0.804321		OECD exp	5	-0.432942	0.926585	5	379245	QSAR avg	5	379245	1.80464	8	3	B(QSAR)	-	-	-	3.20068e-08	QSAR avg.	5.68686e-14	QSAR avg.
p80-10-4	Cl[Si](c1ccccc1)(c1ccccc1)Cl	dichloro(diphenyl)silane	parent_chemical	253.205	organo_silane	neutral	4	Transient	1.58114		2	0.707107	Swater (Avg. QSAR)	4	B(QSAR)	1	V(QSAR avg.)	1.41421	(M1)	(P1-2)	(P1-2)	N	N	-	-	-	5.33904	0.38041	Avg. QSAR	1	5.33904	0.38041	5	3.37029	QSAR avg	2	3.37029	1.36028	8	4	B(QSAR)	-	-	-	0.143126	QSAR avg.	0.0175531	QSAR avg.
p80-15-9	OOc1ccccc1C(C)C	α,α-dimethylbenzyl hydroperoxide	parent_chemical	152.194	organic	ionizable	Transient	Transient	0.957427	exp	2	0.957427	Doc (OECD & lit exp.)	2	B(QSAR) H(OECD exp.)	2	B(QSAR) H(OECD exp.)	0	(M2-3)	(P1-2)	(P1-2)	A	10.1533	QSAR (SPARC)	3.13891	OECD exp.	1.36891		OECD exp	3	2.24055	0.585025	5	3478.03	QSAR avg	4	3478.03	1.58486	8	2	B(QSAR)	2	OECD exp.	-	0.43491	OECD exp.	0.00010643	QSAR avg.
p80-20-6	Oc1ccc(cc1N)S(=O)(=O)Nc1ccccc1	3-amino-4-hydroxy-N-phenylbenzenesulphonamide	parent_chemical	264.304	organic	ionizable	5	5	0.707107		5	0	Swater (Avg. QSAR)	4	B(QSAR)	4	B(QSAR) V(QSAR avg.)	0.707107	(M2-3)	(P3-4)	(P3-4)	amph	amphoprotic	-	-	-	0.887141	1.37725	Avg. QSAR	5	0.887141	1.37725	5	27612.9	QSAR avg	5	27612.9	1.83994	8	4	B(QSAR)	-	-	-	1.63418e-07	QSAR avg.	1.05057e-11	QSAR avg.
p80-26-2	CC(=O)OC(C1CCC(=CC1)C)(C)C	p-menth-1-en-8-yl acetate	parent_chemical	196.291	organic	neutral	Transient	Transient	0.547723		3	0.547723	Doc (PP-LFER)	1	B(exp)	1	B(exp)	0	(M1)	(P1-2)	(P1-2)	N	N	-	2.63466	PP-LFER	4.4		OECD exp	2	3.41352	0.709776	5	23	OECD exp.	3	212.476	1.27811	8	1	B(exp)	4	Hydrowin	-	7.01642	QSAR avg.	0.000235496	PP-LFER
p80-43-3	CC(c1ccccc1OOc1ccccc1C(C)C)C	bis(α,α-dimethylbenzyl) peroxide	parent_chemical	270.374	organic	neutral	4	Transient	0.912871		2	0.57735	Doc (OECD & lit exp.)	4	B(QSAR)	1	V(QSAR avg.)	0.707107	(M1)	(P1-2)	(P1-2)	N	N	-	3.98	OECD exp.	6.0288	0.238122	Avg. QSAR	1	6.0288	0.238122	5	0.317567	QSAR avg	2	0.317567	1.14437	8	4	B(QSAR)	-	-	-	0.00388776	QSAR avg.	0.0253033	QSAR avg.
p80-46-6	CCC(c1ccc(cc1)O)(C)C	p-(1,1-dimethylpropyl)phenol	parent_chemical	164.249	organic	ionizable	1	1	0.57735		3	0.57735	Swater (OECD & lit exp.)	2	B(QSAR)	2	B(QSAR)	0	(M2-3)	(P1-2)	(P1-2)	A	10.2445	QSAR (SPARC)	-	-	3.40423		OECD exp	2	3.56048	0.205178	5	298.21	OECD exp.	3	343.265	0.70078	8	2	B(QSAR)	-	-	-	0.2666	EPIwin Exp.	9.12757e-05	QSAR avg.
p80-51-3	NNS(=O)(=O)c1ccc(cc1)Oc1ccc(cc1)S(=O)(=O)NN	4,4'-oxydi(benzenesulphonohydrazide)	parent_chemical	358.397	organic	ionizable	4	4	1.1547		3	1.1547	Swater (OECD & lit exp.)	4	B(QSAR)	4	B(QSAR) V(QSAR avg.)	0	(M2-3)	(P1-2)	(P3-4)	amph	amphoprotic	-	-	-	0.174647	0.816934	Avg. QSAR	5	0.174647	0.816934	5	62.5	OECD exp.	5	2.98342e+06	2.5002	8	4	B(QSAR)	-	-	-	4.44556e-10	QSAR avg.	2.57636e-16	QSAR avg.
p80-53-5	CC1(O)CCC(CC1)C(O)(C)C	p-menthane-1,8-diol	parent_chemical	172.269	organic	neutral	4.5	4.5	1		4	0.707107	Swater (EPI exp.)	4	B(QSAR)	4	B(QSAR) V(QSAR avg.)	0.707107	(M4-5)	(P1-2)	(P1-2)	N	N	-	-	-	1.48211	0.480102	Avg. QSAR	4	1.48211	0.480102	5	4000	EPI exp.	5	18963.5	1.12421	8	4	B(QSAR)	-	-	-	0.0251377	QSAR avg.	7.58904e-06	QSAR avg.
p80-54-6	O=CC(Cc1ccc(cc1)C(C)(C)C)C	2-(4-tert-butylbenzyl)propionaldehyde	parent_chemical	204.314	organic	neutral	Transient	Transient	0	exp	2	0	Doc (OECD & lit exp.)	1	B(exp)	1	B(exp) V(OECD exp.)	0	(M2-3)	(P1-2)	(P1-2)	N	N	-	3.1085	OECD exp.	4.06723	0.192126	Avg. QSAR	2	4.06723	0.192126	5	45	OECD exp.	2	29.6229	1.31796	8	1	B(exp)	3	OECD exp.	-	0.43	OECD exp.	0.000788004	OECD exp.
p80-56-8,p7785-26-4	CC1=CC[C@H]2C[C@@H]1C2(C)C	pin-2(3)-ene:(-)-pin-2(3)-ene	parent_chemical	136.239	organic	neutral	Transient	Transient	0.57735		2	0.57735	Doc (PP-LFER)	1	B(exp)	1	B(exp) V(EPI exp.)	0	(M1)	(P1-2)	(P1-2)	N	N	-	3.31672	PP-LFER	3.80458	0.899438	Avg. QSAR	2	3.80458	0.899438	5	2.49	EPI exp.	3	89.9233	2.05586	8	1	B(exp)	-	-	-	851	OECD exp.	12.023	EPI exp.
p80-62-6	COC(=O)C(=C)C	methyl methacrylate	parent_chemical	100.118	organic	neutral	Unstable MOC	Unstable MOC	0	exp	5	0	Doc (OECD & lit exp.)	1	B(exp)	1	B(exp) V(EPI exp.)	0	(M4-5)	(P1-2)	(P1-2)	N	N	-	1	OECD exp.	1.38		lit exp.	5	1.17092	0.14942	5	15000	EPI exp.	5	28528.1	0.866284	8	1	B(exp)	4	OECD exp.	-	5132.05	EPIwin Exp.	0.0130454	EPI exp.
p80-73-9	CN1CCN(C1=O)C	1,3-dimethylimidazolidin-2-one	parent_chemical	114.148	organic	neutral	3	3	0.707107		5	0	Swater (Avg. QSAR)	2	B(QSAR)	2	B(QSAR)	0.707107	(M4-5)	(P3-4)	(P3-4)	N	N	-	-	-	-0.446056	0.129496	Avg. QSAR	5	-0.446056	0.129496	5	1.07382e+06	QSAR avg	5	1.07382e+06	2.06013	8	2	B(QSAR)	-	-	-	19.5333	OECD exp.	1.61969e-06	QSAR avg.
p81-07-2	O=C1NS(=O)(=O)c2c1cccc2	1,2-benzisothiazol-3(2H)-one 1,1-dioxide	parent_chemical	183.186	organic	ionizable	4.5	4.5	0.707107		4	0	Swater (EPI exp.)	3	B(QSAR)	3	B(QSAR)	0.707107	(M4-5)	(P3-4)	(P3-4)	A	2.38722	Exp (OECD (log))	-	-	-0.112346	0.678003	Avg. QSAR	5	-3.15746	3.84615	5	4000	EPI exp.	5	7.66175e+10	1.24954	8	3	B(QSAR)	-	-	-	6.87628e-06	QSAR avg.	2.51511e-08	QSAR avg.
p81-11-8	Nc1ccc(c(c1)S(=O)(=O)O)C=Cc1ccc(cc1S(=O)(=O)O)N	4,4'-diaminostilbene-2,2'-disulphonic acid	parent_chemical	370.405	organic	ionizable	Transient	Transient	1.73205	exp	2	1.73205	Swater (OECD & lit exp.)	1	B(exp)	1	B(exp)	0	(M4-5)	(P3-4)	(P3-4)	amph	amphoprotic	-	-	-	-2.67586	1.12208	Avg. QSAR	5	-2.67586	1.12208	4	27	OECD exp.	5	197540	2.00911	6	1	B(exp)	-	-	-	1.38632e-16	QSAR avg.	1.37815e-22	QSAR avg.
p81-13-0	OCCCNC(=O)[C@@H](C(CO)(C)C)O	dexpanthenol	parent_chemical	205.256	organic	neutral	Unstable MOC	Unstable MOC	0	exp	5	0	Swater (OECD & lit exp.)	1	B(exp)	1	B(exp)	0	(M4-5)	(P1-2)	(P1-2)	N	N	-	-	-	-1.62858	0.661965	Avg. QSAR	5	-1.62858	0.661965	5	509000	OECD exp.	5	1.92266e+06	2.08731	8	1	B(exp)	4	OECD exp.	-	5.6e-05	OECD exp.	9.11463e-12	OECD exp.
p81-19-6	ClC(c1c(Cl)cccc1Cl)Cl	α,α,2,6-tetrachlorotoluene	parent_chemical	229.922	organic	neutral	Transient	Transient	0		2	0	Swater (Avg. QSAR)	1	H(LHC QSAR)	1	V(QSAR avg.) H(LHC QSAR)	0	(M2-3)	(P3-4)	(P3-4)	N	N	-	-	-	4.29345	0.187567	Avg. QSAR	2	4.29345	0.187567	5	7.49557	QSAR avg	2	7.49557	0.432246	8	4	B(QSAR)	1	LHC QSAR	-	0.912563	QSAR avg.	0.00975497	QSAR avg.
p81-25-4,h1448-36-8,h3749-87-9	OC1CCC2(C(C1)CC(C1C2CC(O)C2(C1CCC2C(CCC(=O)O)C)C)O)C	cholic acid	hydrolysis_product,parent_chemical	408.582	organic	ionizable	Transient	Transient	0.57735		3	0.57735	Swater (EPI exp.)	1	B(QSAR)	1	B(QSAR)	0	(M2-3)	(P1-2)	(P1-2)	A	4.98	Exp (CRC)	-	-	-2.99		OECD exp	5	-0.587285	1.18848	5	175	EPI exp.	5	2.61096e+07	2.06491	8	1	B(QSAR)	-	-	-	6.4385e-13	QSAR avg.	7.03388e-12	QSAR avg.
p81-33-4	O=c1[nH]c(=O)c2c3c1ccc1c3c(cc2)c2c3c1ccc1c3c(cc2)c(=O)[nH]c1=O	perylene-3,4:9,10-tetracarboxydiimide	parent_chemical	390.357	organic	ionizable	4	4	1.41421		2	1.41421	Swater (Avg. QSAR)	4	B(QSAR)	4	B(QSAR) V(QSAR avg.)	0	(M4-5)	(P3-4)	(P3-4)	A	7.91216	QSAR (avg.)	-	-	2.00991	1.52105	Avg. QSAR	4	1.48707	0.983365	4	15.9068	QSAR avg	2	15.9068	1.01535	6	4	B(QSAR)	-	-	-	4.3989e-21	QSAR avg.	7.52461e-20	QSAR avg.
p81-64-1	Oc1ccc(c2c1C(=O)c1ccccc1C2=O)O	1,4-dihydroxyanthraquinone	parent_chemical	240.217	organic	ionizable	Transient	Transient	0.707107		1	0	Swater (EPI exp.)	2	B(QSAR)	2	B(QSAR)	0.707107	(M4-5)	(P1-2)	(P1-2)	A	9.68	Exp (OECD (average))	-	-	2.09668	1.28971	Avg. QSAR	4	1.90074	1.10741	5	0.0961	EPI exp.	4	5607.67	1.29653	8	2	B(QSAR)	-	-	-	0.000133	OECD exp.	3.26748e-06	EPI exp.
p81-77-6	O=c1c2c3[nH]c4ccc5c(c4[nH]c3ccc2c(=O)c2c1cccc2)c(=O)c1c(c5=O)cccc1	6,15-dihydroanthrazine-5,9,14,18-tetrone	parent_chemical	442.433	organic	neutral	Immobile POC	Immobile POC	0		1	0	Swater (Avg. QSAR)	4	B(QSAR)	4	B(QSAR) V(QSAR avg.)	0	(M2-3)	(P3-4)	(P3-4)	N	N	-	-	-	6.47578	1.28088	Avg. QSAR	1	6.47578	1.28088	4	0.0318652	QSAR avg	1	0.0318652	2.27304	6	4	B(QSAR)	-	-	-	1.25035e-16	QSAR avg.	1.32499e-20	QSAR avg.
p81-81-2	CC(=O)CC(c1c(O)oc2c(c1=O)cccc2)c1ccccc1	warfarin	parent_chemical	308.336	organic	ionizable	3	3	0.707107		5	0	Swater (OECD & lit exp.)	2	B(QSAR)	2	B(QSAR)	0.707107	(M2-3)	(P3-4)	(P3-4)	A	5.02	Exp (Liao et al (2009))	-	-	1.35834	1.35483	Avg. QSAR	5	0.113336	2.0924	4	6.31543e+09	OECD exp.	5	2.00459e+06	1.58596	6	2	B(QSAR)	-	-	-	2.61268e-09	QSAR avg.	1.07962e-12	QSAR avg.
p81-83-4	O=c1[nH]c(=O)c2c3c1cccc3ccc2	naphthalene-1,8-dicarboximide	parent_chemical	197.194	organic	ionizable	Unstable MOC	Unstable MOC	0.57735		5	0.57735	Swater (Avg. QSAR)	1	B(exp)	1	B(exp)	0	(M4-5)	(P3-4)	(P1-2)	A	5.71778	QSAR (avg.)	-	-	-2.88224		OECD exp	5	-0.0735062	1.66445	4	1.43132e+06	QSAR avg	5	1.43132e+06	1.00692	6	1	B(exp)	-	-	-	5.14538e-08	QSAR avg.	4.08128e-08	QSAR avg.
p81-84-5	O=C1OC(=O)c2c3c1cccc3ccc2	naphthalene-1,8-dicarboxylic anhydride	parent_chemical	198.179	organic	neutral	Transient	Transient	1		3	0.707107	Swater (Avg. QSAR)	1	H(LHC QSAR)	1	H(LHC QSAR)	0.707107	(M2-3)	(P3-4)	(P3-4)	N	N	-	-	-	2.15427	0.804488	Avg. QSAR	4	2.15427	0.804488	5	570.56	QSAR avg	3	570.56	2.02548	8	3	B(QSAR)	1	LHC QSAR	-	0.000210598	QSAR avg.	1.26599e-05	QSAR avg.
p83-32-9	c1cc2cccc3c2c(c1)CC3	acenaphthene	parent_chemical	154.213	organic	neutral	3	Transient	0.707107		2	0	Doc (PP-LFER)	3	B(QSAR)	1	V(Lit exp.)	0.707107	(M2-3)	(P3-4)	(P3-4)	N	N	-	3.26026	PP-LFER	4.04		OECD exp	2	3.80562	0.353922	5	3.9	EPI exp.	2	5.38585	0.68527	8	3	B(QSAR)	-	-	-	1.52	Lit. Exp.	0.00462381	Lit exp.
p83-42-1	O=N(=O)c1cccc(c1C)Cl	2-chloro-6-nitrotoluene	parent_chemical	171.584	organic	neutral	4	Transient	0		3	0	Swater (Avg. QSAR)	4	B(QSAR)	1	V(QSAR avg.)	0	(M4-5)	(P3-4)	(P3-4)	N	N	-	-	-	2.90798	0.150813	Avg. QSAR	3	2.90798	0.150813	5	160.126	QSAR avg	3	160.126	1.01454	8	4	B(QSAR)	-	-	-	3.49629	QSAR avg.	0.00105758	QSAR avg.
p83-56-7	Oc1cccc2c1cccc2O	naphthalene-1,5-diol	parent_chemical	160.174	organic	ionizable	1	1	1		3	0.707107	Swater (EPI exp.)	2	B(QSAR)	2	B(QSAR)	0.707107	(M2-3)	(P1-2)	(P3-4)	A	9.03842	QSAR (SPARC)	-	-	1.73229	0.78387	Avg. QSAR	4	1.32964	0.381714	5	165	EPI exp.	5	61601.5	1.2969	8	2	B(QSAR)	-	-	-	0.00154248	QSAR avg.	1.82411e-09	QSAR avg.
p83-73-8	Ic1cc(I)c2c(c1O)nccc2	diiodohydroxyquinoline	parent_chemical	396.954	organic	ionizable	4.5	4.5	1		4	1	Swater (Avg. QSAR)	4	B(QSAR)	4	B(QSAR) V(QSAR avg.)	0	(M2-3)	(P1-2)	(P1-2)	amph	amphoprotic	-	-	-	4		OECD exp	3	2.89588	1.08486	5	8485.65	QSAR avg	4	8485.65	2.41386	8	4	B(QSAR)	-	-	-	2.57125e-06	QSAR avg.	1.94422e-09	QSAR avg.
p84-51-5	CCc1ccc2c(c1)C(=O)c1c(C2=O)cccc1	2-ethylanthraquinone	parent_chemical	236.272	organic	neutral	Transient	Transient	0	exp	2	0	Doc (OECD & lit exp.)	1	B(exp)	1	B(exp)	0	(M2-3)	(P3-4)	(P3-4)	N	N	-	3.61	OECD exp.	3.95347	0.245408	Avg. QSAR	2	3.95347	0.245408	5	2.87633	QSAR avg	2	2.87633	1.64934	8	1	B(exp)	-	-	-	0.00012	OECD exp.	5.06082e-06	PP-LFER
p84-61-7	O=C(c1ccccc1C(=O)OC1CCCCC1)OC1CCCCC1	dicyclohexyl phthalate	parent_chemical	330.427	organic	neutral	Transient	Transient	0.707107		2	0.707107	Swater (EPI exp.)	1	B(QSAR)	1	B(QSAR)	0	(M2-3)	(P1-2)	(P1-2)	N	N	-	-	-	5.47002	0.477823	Avg. QSAR	1	5.47002	0.477823	5	4	EPI exp.	2	1.15345	0.754222	8	1	B(QSAR)	4	Hydrowin	-	0.00011571	OECD exp.	4.08946e-06	EPI exp.
p84-65-1	O=C1c2ccccc2C(=O)c2c1cccc2	anthraquinone	parent_chemical	208.218	organic	neutral	Transient	Transient	0.5	exp	2	0.5	Doc (OECD & lit exp.)	1	B(exp)	1	B(exp)	0	(M2-3)	(P1-2)	(P1-2)	N	N	-	3.2	OECD exp.	3.4		OECD exp	3	3.01017	0.200786	5	1.35	EPI exp.	2	20.2477	1.59064	8	1	B(exp)	-	-	-	1.5464e-05	OECD exp.	9.61024e-07	EPI exp.
p84-66-2	CCOC(=O)c1ccccc1C(=O)OCC	diethyl phthalate	parent_chemical	222.242	organic	neutral	Transient	Transient	0		3	0	Doc (OECD & lit exp.)	1	B(QSAR)	1	B(QSAR) V(OECD exp.)	0	(M2-3)	(P1-2)	(P1-2)	N	N	-	2.365	OECD exp.	2.47	0	lit exp.	3	2.49632	0.183579	5	932	OECD exp.	3	456.42	0.348163	8	1	B(QSAR)	4	OECD exp.	-	2800	OECD exp.	0.26949	OECD exp.
p84-69-5	CC(COC(=O)c1ccccc1C(=O)OCC(C)C)C	diisobutyl phthalate	parent_chemical	278.351	organic	neutral	Transient	Transient	0	exp	2	0	Swater (OECD & lit exp.)	1	B(exp)	1	B(exp)	0	(M2-3)	(P1-2)	(P1-2)	N	N	-	-	-	4.23706	0.238583	Avg. QSAR	2	4.23706	0.238583	5	13.8	OECD exp.	2	15.8594	0.539541	8	1	B(exp)	4	Hydrowin	-	0.160881	QSAR avg.	2.63349e-05	QSAR avg.
p84-74-2	CCCCOC(=O)c1ccccc1C(=O)OCCCC	dibutyl phthalate	parent_chemical	278.351	organic	neutral	Transient	Transient	0	exp	2	0	Doc (OECD & lit exp.)	1	B(exp)	1	B(exp) V(OECD exp.)	0	(M2-3)	(P1-2)	(P1-2)	N	N	-	3.14	OECD exp.	4.4909	0.175194	Avg. QSAR	2	4.4909	0.175194	5	11.4	OECD exp.	2	10.4156	0.638601	8	1	B(exp)	4	OECD exp.	-	0.50485	OECD exp.	0.00497535	OECD exp.
p84-87-7	Oc1ccc(c2c1cccc2)S(=O)(=O)O	4-hydroxynaphthalene-1-sulphonic acid	parent_chemical	224.236	organic	ionizable	5	5	1.41421		5	0	Swater (Avg. QSAR)	4	B(QSAR)	4	B(QSAR) V(QSAR avg.)	1.41421	(M4-5)	(P3-4)	(P3-4)	A	0.95172	QSAR (SPARC)	-	-	-1.44298	0.819398	Avg. QSAR	5	-3.70505	3.90769	4	241691995727811	QSAR avg	5	241691995727811	2.00279	5	4	B(QSAR)	-	-	-	1.30101e-07	QSAR avg.	1.0469e-12	QSAR avg.
p85-18-7	Clc1nc2c([nH]1)n(C)c(=O)n(c2=O)C	8-chlorotheophylline	parent_chemical	214.612	organic	ionizable	4.5	4.5	0.707107		4	0	Swater (EPI exp.)	4	B(QSAR)	4	B(QSAR) V(QSAR avg.)	0.707107	(M4-5)	(P3-4)	(P1-2)	amph	amphoprotic	-	-	-	-0.291397	0.662735	Avg. QSAR	5	-0.291397	0.662735	4	6670	EPI exp.	5	15817.5	0.909474	6	4	B(QSAR)	-	-	-	1.54628e-08	QSAR avg.	5.07093e-11	QSAR avg.
p85-27-8	Oc1ccc(c(c1)O)C(c1ccccc1)C	4-(1-Phenylethyl)-benzene-1,3-diol	parent_chemical	214.266	organic	ionizable	4.5	4.5	1.48324		4	0.447214	Doc (OECD & lit exp.)	3	B(QSAR)	3	B(QSAR)	1.41421	(M2-3)	(P1-2)	(P1-2)	A	9.73592	QSAR (SPARC)	1.50716	OECD exp.	1.65716		OECD exp	3	2.92832	0.334271	5	11489.3	OECD exp.	4	1162.37	0.71698	8	3	B(QSAR)	4	OECD exp.	-	1.75e-05	OECD exp.	3.73688e-10	OECD exp.
p85-40-5	O=C1NC(=O)C2C1CC=CC2	1,2,3,6-tetrahydrophthalimide	parent_chemical	151.166	organic	ionizable	Unstable MOC	Unstable MOC	0		5	0	Swater (Avg. QSAR)	1	H(LHC QSAR)	1	H(LHC QSAR)	0	(M4-5)	(P1-2)	(P1-2)	A	9.63893	QSAR (SPARC)	-	-	-0.658052		OECD exp	5	-0.168547	0.29476	5	69371.5	QSAR avg	5	69371.5	0.778434	8	2	B(QSAR)	1	LHC QSAR	-	0.00296556	QSAR avg.	6.31857e-07	QSAR avg.
p85-41-6	O=C1NC(=O)c2c1cccc2	phthalimide	parent_chemical	147.134	organic	ionizable	Unstable MOC	Unstable MOC	1.1547	exp	5	1.1547	Swater (OECD & lit exp.)	1	B(exp) H(LHC QSAR)	1	B(exp) H(LHC QSAR)	0	(M4-5)	(P1-2)	(P1-2)	A	8.3	Exp (OECD)	-	-	0.172007	0.88057	Avg. QSAR	5	-0.511425	0.74325	5	30671.2	OECD exp.	5	177895	0.729449	8	1	B(exp)	1	LHC QSAR	-	0.00056	OECD exp.	5.54273e-08	OECD exp.
p85-42-7	O=C1OC(=O)C2C1CCCC2	cyclohexane-1,2-dicarboxylic anhydride	parent_chemical	154.167	organic	neutral	Transient	Transient	1.1547		3	1.1547	Doc (OECD & lit exp.)	1	H(LHC QSAR)	1	V(QSAR avg.) H(LHC QSAR)	0	(M2-3)	(P1-2)	(P1-2)	N	N	-	2.3	OECD exp.	0.801387	1.18755	Avg. QSAR	5	0.801387	1.18755	5	118526	QSAR avg	5	118526	2.5293	8	2	B(QSAR)	1	LHC QSAR	-	93	OECD exp.	0.000439622	QSAR avg.
p85-43-8	O=C1OC(=O)C2C1CC=CC2	1,2,3,6-tetrahydrophthalic anhydride	parent_chemical	152.151	organic	neutral	Unstable MOC	Unstable MOC	0.5		5	0.5	Doc (OECD & lit exp.)	1	H(LHC QSAR)	1	V(QSAR avg.) H(LHC QSAR)	0	(M4-5)	(P1-2)	(P1-2)	N	N	-	0.07	OECD exp.	1.29		OECD exp	5	0.506602	1.16552	5	145948	QSAR avg	5	145948	2.51237	8	2	B(QSAR)	1	LHC QSAR	-	0.045	OECD exp.	0.000386458	QSAR avg.
p85-44-9	O=C1OC(=O)c2c1cccc2	phthalic anhydride	parent_chemical	148.119	organic	neutral	Unstable MOC	Unstable MOC	0	exp	4	0	Swater (EPI exp.)	1	B(exp) H(LHC QSAR)	1	B(exp) H(LHC QSAR) PT(exp.)	0	(M4-5)	(P1-2)	(P1-2)	N	N	-	-	-	1.00626	1.02056	Avg. QSAR	5	1.00626	1.02056	5	6200	EPI exp.	5	14310.2	1.67488	8	1	B(exp)	1	LHC QSAR	1	0.04795	OECD exp.	6.66582e-07	EPI exp.
p85-60-9	CCCC(c1cc(c(cc1C)O)C(C)(C)C)c1cc(c(cc1C)O)C(C)(C)C	6,6'-di-tert-butyl-4,4'-butylidenedi-m-cresol	parent_chemical	382.59	organic	ionizable	Immobile POC	Immobile POC	0.5		1	0.5	Doc (OECD & lit exp.)	4	B(QSAR)	4	B(QSAR) V(QSAR avg.)	0	(M2-3)	(P3-4)	(P3-4)	A	11.1901	QSAR (SPARC)	5.45283	OECD exp.	6.37283		OECD exp	1	8.4206	0.432337	5	0.254506	QSAR avg	2	0.254506	2.5972	8	4	B(QSAR)	-	-	-	80.6	OECD exp.	7.11633e-09	QSAR avg.
p85-68-7	CCCCOC(=O)c1ccccc1C(=O)OCc1ccccc1	benzyl butyl phthalate	parent_chemical	312.368	organic	neutral	Transient	Transient	0.707107		2	0.707107	Swater (EPI exp.)	1	B(QSAR)	1	B(QSAR)	0	(M2-3)	(P3-4)	(P3-4)	N	N	-	-	-	4.77021	0.214657	Avg. QSAR	1	4.77021	0.214657	5	2.69	EPI exp.	2	2.67036	0.714211	8	1	B(QSAR)	4	Hydrowin	-	1.1	OECD exp.	5.15272e-05	EPI exp.
p85-73-4	O=C(c1ccccc1C(=O)O)Nc1ccc(cc1)S(=O)(=O)N=c1scc[nH]1	phthalylsulfathiazole	parent_chemical	403.437	organic	ionizable	5	5	1.41421		5	0	Swater (Avg. QSAR)	4	B(QSAR)	4	B(QSAR) V(QSAR avg.)	1.41421	(M4-5)	(P3-4)	(P1-2)	amph	amphoprotic	-	-	-	0.01		OECD exp	5	-0.360035	1.07988	4	28719.4	QSAR avg	5	28719.4	2.12932	6	4	B(QSAR)	-	-	-	3.77239e-13	QSAR avg.	2.3678e-19	QSAR avg.
p85-98-3	CCN(C(=O)N(c1ccccc1)CC)c1ccccc1	1,3-diethyldiphenylurea	parent_chemical	268.361	organic	neutral	4	4	1.52753		3	0.57735	Doc (OECD & lit exp.)	4	B(QSAR)	4	B(QSAR) V(QSAR avg.)	1.41421	(M2-3)	(P3-4)	(P3-4)	N	N	-	2.53	OECD exp.	3.83069	0.495607	Avg. QSAR	2	3.83069	0.495607	5	22.8946	QSAR avg	2	22.8946	1.25144	8	4	B(QSAR)	-	-	-	0.000473413	QSAR avg.	2.91675e-06	QSAR avg.
p86-28-2	CCn1c2ccccc2c2c1cccc2	9-ethylcarbazole	parent_chemical	195.266	organic	ionizable	4	4	0.912871		3	0.57735	Swater (Avg. QSAR)	3	B(QSAR)	3	B(QSAR) V(QSAR avg.)	0.707107	(M1)	(P3-4)	(P3-4)	B	6.52	QSAR (avg.)	-	-	1.94869		OECD exp	3	2.62193	1.17757	5	415.23	QSAR avg	3	415.23	0.791993	8	3	B(QSAR)	-	-	-	0.0100329	QSAR avg.	0.00012668	QSAR avg.
p86-73-7	c1ccc2c(c1)Cc1c2cccc1	fluorene	parent_chemical	166.224	organic	neutral	3	Transient	0.707107		2	0	Doc (PP-LFER)	3	B(QSAR)	1	V(Lit exp.)	0.707107	(M2-3)	(P1-2)	(P1-2)	N	N	-	3.51248	PP-LFER	4.18	0	lit exp.	2	3.95121	0.333753	5	1.69	EPI exp.	2	5.18482	0.95531	8	3	B(QSAR)	-	-	-	0.715	Lit. Exp.	0.00346737	Lit exp.
p86-74-8	c1ccc2c(c1)[nH]c1c2cccc1	carbazole	parent_chemical	167.212	organic	neutral	3	3	0.707107		2	0	Doc (PP-LFER)	3	B(QSAR)	3	B(QSAR)	0.707107	(M2-3)	(P3-4)	(P3-4)	N	N	-	3.46968	PP-LFER	3.41		OECD exp	2	3.2956	0.234044	5	1.8	EPI exp.	2	17.5772	0.652959	8	3	B(QSAR)	-	-	-	9.9975e-05	EPIwin Exp.	4.74378e-06	EPI exp.
p86-84-0	O=C=Nc1cccc2c1cccc2	1-naphthyl isocyanate	parent_chemical	169.184	organic	neutral	Transient	Transient	0.707107		3	0	Swater (Avg. QSAR)	1	H(LHC QSAR)	1	V(QSAR avg.) H(LHC QSAR)	0.707107	(M2-3)	(P3-4)	(P3-4)	N	N	-	-	-	2.8878	0.637191	Avg. QSAR	3	2.8878	0.637191	5	442.122	QSAR avg	3	442.122	2.40466	8	3	B(QSAR)	1	LHC QSAR	-	0.908373	QSAR avg.	0.000467775	QSAR avg.
p86-92-0	Cc1ccc(cc1)n1[nH]c(cc1=O)C	3-methyl-1-p-tolyl-5-pyrazolone	parent_chemical	188.231	organic	ionizable	5	5	0.707107		5	0	Swater (Avg. QSAR)	4	B(QSAR)	4	B(QSAR) V(QSAR avg.)	0.707107	(M4-5)	(P1-2)	(P1-2)	A	7.88	Exp (OECD)	-	-	0.858668	0.492084	Avg. QSAR	5	0.327848	1.12617	4	8.74601e+06	QSAR avg	5	8.74601e+06	2.3668	6	4	B(QSAR)	-	-	-	0.00126235	QSAR avg.	1.36588e-08	QSAR avg.
p87-02-5	Nc1ccc2c(c1)cc(cc2O)S(=O)(=O)O	7-amino-4-hydroxynaphthalene-2-sulphonic acid	parent_chemical	239.251	organic	ionizable	5	5	0.707107		5	0	Swater (Avg. QSAR)	4	B(QSAR)	4	B(QSAR) V(QSAR avg.)	0.707107	(M4-5)	(P3-4)	(P3-4)	amph	amphoprotic	-	-	-	-1.78268	0.468533	Avg. QSAR	5	-1.78268	0.468533	4	218721	QSAR avg	5	218721	1.78072	6	4	B(QSAR)	-	-	-	3.26585e-09	QSAR avg.	3.69278e-16	QSAR avg.
p87-13-8	CCOC=C(C(=O)OCC)C(=O)OCC	diethyl ethoxymethylenemalonate	parent_chemical	216.236	organic	neutral	Unstable MOC	Unstable MOC	0.707107		5	0.707107	Swater (Avg. QSAR)	1	B(QSAR)	1	B(QSAR)	0	(M4-5)	(P1-2)	(P1-2)	N	N	-	-	-	1.57764	0.680127	Avg. QSAR	4	1.57764	0.680127	5	12203.6	QSAR avg	5	12203.6	1.45064	8	1	B(QSAR)	4	Hydrowin	-	2.76536	QSAR avg.	3.28262e-05	QSAR avg.
p87-33-2	O=N(=O)O[C@@H]1CO[C@H]2[C@@H]1OC[C@@H]2ON(=O)=O	isosorbide dinitrate	parent_chemical	236.139	organic	neutral	4	4	0.707107		3	0.707107	Swater (EPI exp.)	4	B(QSAR)	4	B(QSAR) V(QSAR avg.)	0	(M2-3)	(P3-4)	(P3-4)	N	N	-	-	-	1.25433	1.23765	Avg. QSAR	4	1.25433	1.23765	5	550	EPI exp.	5	20415.3	1.21777	8	4	B(QSAR)	-	-	-	0.0453953	QSAR avg.	1.88938e-08	QSAR avg.
p87-41-2	O=C1OCc2c1cccc2	phthalide	parent_chemical	134.135	organic	neutral	Unstable MOC	Unstable MOC	0.707107		4	0.707107	Swater (Avg. QSAR)	1	B(QSAR)	1	B(QSAR)	0	(M4-5)	(P1-2)	(P1-2)	N	N	-	-	-	1.10394	0.516233	Avg. QSAR	5	1.10394	0.516233	5	7725.87	QSAR avg	4	7725.87	1.21631	8	1	B(QSAR)	-	-	-	0.266	OECD exp.	0.000188585	QSAR avg.
p87-56-9	O=CC(=C(C(=O)O)Cl)Cl	mucochloric acid	parent_chemical	168.965	organic	ionizable	Unstable MOC	Unstable MOC	0		5	0	Swater (Avg. QSAR)	1	B(QSAR)	1	B(QSAR)	0	(M4-5)	(P1-2)	(P1-2)	A	2.05529	QSAR (SPARC)	-	-	-0.528612	1.82138	Avg. QSAR	5	-3.70649	2.84354	5	2.30682e+12	QSAR avg	5	2.30682e+12	1.93349	8	1	B(QSAR)	-	-	-	0.0926527	QSAR avg.	9.50042e-08	QSAR avg.
p87-59-2	Cc1c(C)cccc1N	2,3-xylidine	parent_chemical	121.183	organic	ionizable	5	5	1		5	0.707107	Swater (Avg. QSAR)	3	B(QSAR)	3	B(QSAR) V(QSAR avg.)	0.707107	(M4-5)	(P3-4)	(P3-4)	B	4.74707	QSAR (SPARC)	-	-	1.62671	0.39495	Avg. QSAR	4	1.29927	0.162494	5	11153.6	QSAR avg	5	11153.6	0.490712	8	3	B(QSAR)	-	-	-	9.9975	EPIwin Exp.	0.000104848	QSAR avg.
p87-60-5	N=C1C=CC=CC1(C)Cl	3-chloro-o-toluidine	parent_chemical	141.601	organic	ionizable	1	Transient	1.35401		3	1.1547	Doc (OECD & lit exp.)	2	H(LHC QSAR)	1	V(QSAR avg.)	0.707107	(M2-3)	(P3-4)	(P3-4)	B	3.62	Exp (OECD)	2.00867	OECD exp.	1.14668	1.63971	Avg. QSAR	5	1.08615	1.57405	5	1416.87	OECD exp.	5	17694.6	1.56444	8	3	B(QSAR)	2	LHC QSAR	-	84.6424	QSAR avg.	0.025498	QSAR avg.
p87-61-6	Clc1c(Cl)cccc1Cl	1,2,3-trichlorobenzene	parent_chemical	181.45	organic	neutral	4	Transient	0.57735		3	0.57735	Doc (OECD & lit exp.)	4	B(QSAR)	1	V(OECD exp.)	0	(M2-3)	(P3-4)	(P3-4)	N	N	-	2.87	OECD exp.	4.07667	0.0550757	lit exp.	2	3.86393	0.0985247	5	18	EPI exp.	2	26.0767	0.513041	8	4	B(QSAR)	-	-	-	22.615	OECD exp.	0.0744075	OECD exp.
p87-62-7,h39627-98-0,h1037184-07-8	Cc1cccc(c1N)C	2,6-xylidine	hydrolysis_product,parent_chemical	121.183	organic	ionizable	4.5	2	0.707107		4	0	Doc (PP-LFER)	3	B(QSAR)	2	V(Lit exp.)	0.707107	(M2-3)	(P3-4)	(P3-4)	B	3.95	Exp (OECD)	1.28337	PP-LFER	1.29325		OECD exp	4	1.666	0.202999	5	8240	EPI exp.	4	4787.52	0.760868	8	3	B(QSAR)	-	-	-	16.7	OECD exp.	0.000151356	Lit exp.
p87-69-4,s754186-36-2,h2743-38-6,h17637-11-5,h191605-10-4	OC(C(C(=O)O)O)C(=O)O	(+)-tartaric acid:(S)-N-[(Diethylamino)methyl]-.alpha.-ethyl-2-oxo-1-pyrrolidineacetamide L-(+)-tartrate	hydrolysis_product,parent_chemical,salt_or_mixture_component	150.089	organic	neutral	Unstable MOC	Unstable MOC	0	exp	5	0	Swater (EPI exp.)	1	B(exp)	1	B(exp)	0	(M4-5)	(P1-2)	(P1-2)	N	N	-	-	-	-4.49093	2.84901	Avg. QSAR	5	-4.49093	2.84901	5	246000	EPI exp.	5	6.35593e+06	1.96895	8	1	B(exp)	-	-	-	6.5569e-06	OECD exp.	2.69906e-09	QSAR avg.
p87-99-0	OC[C@H]([C@@H]([C@H](CO)O)O)O	xylitol	parent_chemical	152.148	organic	neutral	Unstable MOC	Unstable MOC	0		5	0	Swater (OECD & lit exp.)	1	B(QSAR)	1	B(QSAR)	0	(M4-5)	(P1-2)	(P1-2)	N	N	-	-	-	-3.11538	1.2067	Avg. QSAR	5	-3.11538	1.2067	5	642000	OECD exp.	5	3.42013e+07	2.46855	8	1	B(QSAR)	-	-	-	0.130634	QSAR avg.	2.04473e-10	QSAR avg.
p88-12-0	C=CN1CCCC1=O	1-vinyl-2-pyrrolidone	parent_chemical	111.144	organic	neutral	Unstable MOC	Unstable MOC	0.5	exp	4	0.5	Doc (OECD & lit exp.)	1	B(exp)	1	B(exp)	0	(M4-5)	(P3-4)	(P3-4)	N	N	-	1.12	OECD exp.	0.4		OECD exp	5	0.187063	0.338649	5	102818	QSAR avg	5	102818	1.05834	8	1	B(exp)	-	-	-	90.5894	QSAR avg.	1.38377e-05	QSAR avg.
p88-17-5	Nc1ccccc1C(F)(F)F	α,α,α-trifluoro-o-toluidine	parent_chemical	161.127	organic	neutral	4.5	Unstable MOC	0.5		4	0.5	Swater (OECD & lit exp.)	4	B(QSAR)	1	V(QSAR avg.)	0	(M2-3)	(P3-4)	(P3-4)	N	N	-	-	-	2.32		OECD exp	4	1.93885	0.197674	5	3400	OECD exp.	4	2037.96	1.47781	8	4	B(QSAR)	-	-	-	113.447	QSAR avg.	0.000746073	QSAR avg.
p88-18-6	Oc1ccccc1C(C)(C)C	2-tert-butylphenol	parent_chemical	150.222	organic	ionizable	2	Unstable MOC	0.5		4	0.5	Swater (OECD & lit exp.)	2	B(QSAR)	1	V(EPI exp.)	0	(M2-3)	(P1-2)	(P1-2)	A	10.62	Exp (CRC)	-	-	3.20662		OECD exp	3	3.1199	0.132088	5	1202.69	OECD exp.	3	926.661	0.631254	8	2	B(QSAR)	-	-	-	11.997	EPIwin Exp.	0.00103872	EPI exp.
p88-19-7,s1333-07-9	Cc1ccccc1S(=O)(=O)N	toluene-2-sulphonamide:toluenesulphonamide	parent_chemical,salt_or_mixture_component	171.219	organic	ionizable	4.5	4.5	1		4	0.707107	Swater (EPI exp.)	3	B(QSAR)	3	B(QSAR)	0.707107	(M4-5)	(P3-4)	(P3-4)	A	10.0235	QSAR (SPARC)	-	-	0.900639	0.259532	Avg. QSAR	5	0.784871	0.238004	5	1620	EPI exp.	4	9199.94	0.72344	8	3	B(QSAR)	-	-	-	6.6e-05	OECD exp.	1.00076e-05	QSAR avg.
p88-21-1	Nc1ccccc1S(=O)(=O)O	2-aminobenzenesulphonic acid	parent_chemical	173.191	organic	ionizable	5	5	0.707107		5	0	Swater (EPI exp.)	4	B(QSAR)	4	B(QSAR) V(QSAR avg.)	0.707107	(M4-5)	(P3-4)	(P3-4)	amph	amphoprotic	-	-	-	-1.9744	0.114822	Avg. QSAR	5	-1.9744	0.114822	4	10600	EPI exp.	5	537222	1.50429	6	4	B(QSAR)	-	-	-	2.69266e-05	QSAR avg.	3.63553e-11	QSAR avg.
p88-23-3	Clc1cc(N)c(c(c1)S(=O)(=O)O)O	3-amino-5-chloro-2-hydroxybenzenesulphonic acid	parent_chemical	223.636	organic	ionizable	5	5	0		5	0	Swater (Avg. QSAR)	4	B(QSAR)	4	B(QSAR) V(QSAR avg.)	0	(M4-5)	(P3-4)	(P3-4)	amph	amphoprotic	-	-	-	-1.62882	0.385082	Avg. QSAR	5	-1.62882	0.385082	4	384818	QSAR avg	5	384818	1.37245	6	4	B(QSAR)	-	-	-	2.27943e-07	QSAR avg.	2.80537e-15	QSAR avg.
p88-27-7	CN(Cc1cc(c(c(c1)C(C)(C)C)O)C(C)(C)C)C	2,6-di-tert-butyl-α-dimethylamino-p-cresol	parent_chemical	263.426	organic	ionizable	4	4	1.29099		2	1.29099	Doc (OECD & lit exp.)	4	B(QSAR)	4	B(QSAR) V(QSAR avg.)	0	(M2-3)	(P3-4)	(P3-4)	amph	amphoprotic	-	3.8145	OECD exp.	2.80078	1.49323	Avg. QSAR	3	2.80078	1.49323	5	8840	OECD exp.	5	12282.4	1.78917	8	4	B(QSAR)	-	-	-	0.00133632	QSAR avg.	3.53191e-07	QSAR avg.
p88-44-8	Cc1ccc(c(c1)S(=O)(=O)O)N	4-aminotoluene-3-sulphonic acid	parent_chemical	187.218	organic	ionizable	4.5	4.5	0.912871		4	0.57735	Swater (OECD & lit exp.)	4	B(QSAR)	4	B(QSAR) V(QSAR avg.)	0.707107	(M4-5)	(P3-4)	(P3-4)	amph	amphoprotic	-	-	-	-1.66365	0.397146	Avg. QSAR	5	-1.66365	0.397146	4	6000	OECD exp.	5	303677	1.40032	6	4	B(QSAR)	-	-	-	9.42431e-06	QSAR avg.	4.01176e-11	QSAR avg.
p88-45-9	Nc1ccc(c(c1)S(=O)(=O)O)N	2,5-diaminobenzenesulphonic acid	parent_chemical	188.206	organic	ionizable	5	5	0		5	0	Swater (Avg. QSAR)	4	B(QSAR)	4	B(QSAR) V(QSAR avg.)	0	(M4-5)	(P3-4)	(P3-4)	amph	amphoprotic	-	-	-	-2.81637	0.550618	Avg. QSAR	5	-2.81637	0.550618	4	828249	QSAR avg	5	828249	1.48369	6	4	B(QSAR)	-	-	-	6.63834e-07	QSAR avg.	1.28409e-14	QSAR avg.
p88-50-6	Clc1cc(c(cc1N)Cl)S(=O)(=O)O	4-amino-2,5-dichlorobenzenesulphonic acid	parent_chemical	242.081	organic	ionizable	5	5	0		5	0	Swater (Avg. QSAR)	4	B(QSAR)	4	B(QSAR) V(QSAR avg.)	0	(M2-3)	(P3-4)	(P3-4)	amph	amphoprotic	-	-	-	-0.766315	0.186983	Avg. QSAR	5	-0.766315	0.186983	4	174213	QSAR avg	5	174213	2.54018	5	4	B(QSAR)	-	-	-	1.06373e-06	QSAR avg.	1.99566e-11	QSAR avg.
p88-51-7	Nc1cc(Cl)c(cc1S(=O)(=O)O)C	4-amino-6-chlorotoluene-3-sulphonic acid	parent_chemical	221.663	organic	ionizable	5	5	0		5	0	Swater (Avg. QSAR)	4	B(QSAR)	4	B(QSAR) V(QSAR avg.)	0	(M4-5)	(P3-4)	(P3-4)	amph	amphoprotic	-	-	-	-0.981191	0.315035	Avg. QSAR	5	-0.981191	0.315035	4	219792	QSAR avg	5	219792	1.7873	6	4	B(QSAR)	-	-	-	2.06615e-06	QSAR avg.	2.97304e-11	QSAR avg.
p88-60-8	Cc1ccc(c(c1)O)C(C)(C)C	6-tert-butyl-m-cresol	parent_chemical	164.249	organic	ionizable	1	1	0.57735		3	0.57735	Swater (OECD & lit exp.)	2	B(QSAR)	2	B(QSAR)	0	(M2-3)	(P1-2)	(P3-4)	A	11.2509	QSAR (SPARC)	-	-	3.68061	0.188311	Avg. QSAR	2	3.67113	0.18175	5	368.584	OECD exp.	3	227.306	0.618135	8	2	B(QSAR)	-	-	-	1.50961	QSAR avg.	0.000113707	QSAR avg.
p88-66-4	ClC(c1ccccc1Cl)Cl	1-chloro-2-(dichloromethyl)benzene	parent_chemical	195.477	organic	neutral	Transient	Transient	0		2	0	Swater (Avg. QSAR)	1	H(LHC QSAR)	1	V(QSAR avg.) H(LHC QSAR)	0	(M2-3)	(P3-4)	(P3-4)	N	N	-	-	-	3.66781	0.221016	Avg. QSAR	2	3.66781	0.221016	5	36.4246	QSAR avg	2	36.4246	0.413131	8	4	B(QSAR)	1	LHC QSAR	-	7.10209	QSAR avg.	0.0137761	QSAR avg.
p88-72-2,s1321-12-6	O=N(=O)c1ccccc1C	2-nitrotoluene:nitrotoluene	parent_chemical,salt_or_mixture_component	137.139	organic	neutral	4.5	Unstable MOC	1.52753		4	0.57735	Doc (PP-LFER)	4	B(QSAR)	1	V(Lit exp.)	1.41421	(M2-3)	(P3-4)	(P1-2)	N	N	-	1.86952	PP-LFER	2.3	0	lit exp.	3	2.27819	0.126633	5	650	EPI exp.	3	932.126	0.944047	8	4	B(QSAR)	-	-	-	18	Lit. Exp.	0.00234423	Lit exp.
p88-73-3	O=N(=O)c1ccccc1Cl	1-chloro-2-nitrobenzene	parent_chemical	157.557	organic	neutral	4	Transient	0		3	0	Doc (OECD & lit exp.)	4	B(QSAR) H(LHC QSAR)	1	V(OECD exp.)	0	(M2-3)	(P3-4)	(P3-4)	N	N	-	2.499	OECD exp.	2.45525	0.0871191	Avg. QSAR	3	2.45525	0.0871191	5	441	EPI exp.	3	369.396	0.663942	8	4	B(QSAR)	4	LHC QSAR	-	2.394	OECD exp.	0.000380211	OECD exp.
p88-74-4,h874819-71-3	O=N(=O)c1ccccc1N	2-nitroaniline	hydrolysis_product,parent_chemical	138.127	organic	neutral	4.5	4.5	0		4	0	Doc (PP-LFER)	4	B(QSAR)	4	B(QSAR) V(Lit exp.)	0	(M2-3)	(P3-4)	(P3-4)	N	N	-	1.57558	PP-LFER	1.69	0.277128	lit exp.	4	1.48995	0.705022	5	1470	EPI exp.	4	3390.26	0.558372	8	4	B(QSAR)	-	-	-	0.36841	OECD exp.	3.89045e-06	Lit exp.
p88-75-5,h88-73-3,h1493-27-2	O=N(=O)c1ccccc1O	2-nitrophenol	hydrolysis_product,parent_chemical	139.111	organic	ionizable	5	Unstable MOC	0.707107		5	0	Doc (PP-LFER)	3	B(QSAR)	1	V(Lit exp.)	0.707107	(M2-3)	(P1-2)	(P1-2)	A	7.23	Exp (OECD)	-1.32734	PP-LFER	-0.950737	0.0424264	lit exp.	5	-0.154622	0.979396	5	2500	EPI exp.	5	1.29665e+06	0.501509	8	3	B(QSAR)	-	-	-	13.7325	OECD exp.	0.000436516	Lit exp.
p88-85-7	CCC(c1cc(cc(c1O)N(=O)=O)N(=O)=O)C	dinoseb	parent_chemical	240.217	organic	ionizable	5	5	0.5		5	0.5	Doc (PP-LFER)	4	B(QSAR)	3	PT(exp.)	0	(M2-3)	(P3-4)	(P3-4)	A	4.65	Exp (OECD)	-2.2693	PP-LFER	-4.09		OECD exp	5	0.0892237	1.91416	5	52	EPI exp.	5	1.20968e+07	1.50139	8	4	B(QSAR)	-	-	3	0.00665	OECD exp.	1.86479e-05	EPI exp.
p88-95-9	ClC(=O)c1ccccc1C(=O)Cl	phthaloyl dichloride	parent_chemical	203.025	organic	neutral	4.5	4.5	1.41421		4	0	Swater (Avg. QSAR)	4	B(QSAR)	4	B(QSAR) V(QSAR avg.)	1.41421	(M4-5)	(P1-2)	(P1-2)	N	N	-	-	-	1.89401	0.588115	Avg. QSAR	4	1.89401	0.588115	5	6389.13	QSAR avg	4	6389.13	2.10691	8	4	B(QSAR)	-	-	-	2.15946	EPIwin Exp.	6.73877e-05	QSAR avg.
p88-99-3,h84-61-7,h84-66-2,h84-69-5,h84-74-2,h85-41-6,h85-44-9,h85-68-7,h88-95-9,h91-15-6,h117-81-7,h131-11-3,h131-17-9,h605-50-5,h2436-29-5,h3648-20-2,h3891-07-4,h4443-26-9,h6607-34-7,h16883-83-3,h17796-82-6,h27253-26-5,h28553-12-0,h53306-54-0,h68515-47-9,h68515-48-0,h68515-49-1,h68515-51-5,h71662-46-9,h74860-00-7,h88150-62-3,h143878-20-0,h161596-47-0,h170222-39-6,h265136-65-0,h371771-07-2,h3719…	OC(=O)c1ccccc1C(=O)O	phthalic acid	hydrolysis_product,parent_chemical	166.134	organic	neutral	Unstable MOC	Unstable MOC	0.57735	exp	4	0.57735	Doc (OECD & lit exp.)	1	B(exp)	1	B(exp)	0	(M4-5)	(P1-2)	(P1-2)	N	N	-	1.86	OECD exp.	-1.77796	2.8106	Avg. QSAR	5	-1.77796	2.8106	5	6970	EPI exp.	5	73002.8	1.77009	8	1	B(exp)	-	-	-	8.47788e-05	EPIwin Exp.	8.17892e-10	EPI exp.
p89-00-9	OC(=O)c1ncccc1C(=O)O	pyridine-2,3-dicarboxylic acid	parent_chemical	167.122	organic	ionizable	3	3	0.707107		5	0	Swater (EPI exp.)	2	B(QSAR)	2	B(QSAR)	0.707107	(M4-5)	(P1-2)	(P1-2)	amph	amphoprotic	-	-	-	-2.3305	2.94658	Avg. QSAR	5	-2.3305	2.94658	5	11000	EPI exp.	5	431309	2.3916	8	2	B(QSAR)	-	-	-	0.000229113	QSAR avg.	1.36992e-08	QSAR avg.
p89-04-3	CCCCCCCCOC(=O)c1cc(ccc1C(=O)OCCCCCCCC)C(=O)OCCCCCCCC	trioctyl benzene-1,2,4-tricarboxylate	parent_chemical	546.793	organic	neutral	Transient	Transient	0		1	0	Swater (Avg. QSAR)	1	B(QSAR)	1	B(QSAR)	0	(M1)	(P3-4)	(P3-4)	N	N	-	-	-	11.004	0.58295	Avg. QSAR	1	11.004	0.58295	5	0.0381214	QSAR avg	1	0.0381214	2.40279	8	1	B(QSAR)	4	OECD exp.	-	3.46643e-10	QSAR avg.	1.10324e-05	QSAR avg.
p89-05-4	OC(=O)c1cc(C(=O)O)c(cc1C(=O)O)C(=O)O	benzene-1,2,4,5-tetracarboxylic acid	parent_chemical	254.154	organic	ionizable	3	3	0.707107		5	0	Swater (EPI exp.)	2	B(QSAR)	2	B(QSAR)	0.707107	(M4-5)	(P1-2)	(P3-4)	amph	amphoprotic	-	-	-	-4.47003	6.01633	Avg. QSAR	5	-4.47003	6.01633	5	14000	EPI exp.	5	91217.5	1.51284	8	2	B(QSAR)	-	-	-	1.24011e-09	QSAR avg.	7.28378e-14	QSAR avg.
p89-25-8	Cc1[nH]n(c(=O)c1)c1ccccc1	3-methyl-1-phenyl-5-pyrazolone	parent_chemical	174.203	organic	ionizable	5	5	1.41421		5	0	Swater (Avg. QSAR)	4	B(QSAR)	4	B(QSAR) V(QSAR avg.)	1.41421	(M4-5)	(P1-2)	(P1-2)	A	8.18837	QSAR (avg.)	-	-	0.417068	0.41313	Avg. QSAR	5	-0.0375009	1.02085	4	1.1395e+07	QSAR avg	5	1.1395e+07	2.34008	6	4	B(QSAR)	-	-	-	0.00245272	QSAR avg.	1.23911e-08	QSAR avg.
p89-33-8	CCOC(=O)C1=NN(C(=O)C1)c1ccccc1	ethyl 5-oxo-1-phenyl-2-pyrazoline-3-carboxylate	parent_chemical	232.24	organic	ionizable	Unstable MOC	Unstable MOC	1	exp	4	1	Swater (OECD & lit exp.)	1	B(exp)	1	B(exp)	0	(M2-3)	(P1-2)	(P1-2)	A	8.92226	QSAR (SPARC)	-	-	1.67328	0.423391	Avg. QSAR	4	1.22824	0.815479	5	1671.88	OECD exp.	5	15931.9	1.46239	8	1	B(exp)	4	Hydrowin	-	0.000113215	QSAR avg.	8.76811e-08	QSAR avg.
p89-36-1	O=C1CC(=NN1c1ccc(cc1)S(=O)(=O)O)C	4-(3-methyl-5-oxo-2-pyrazolin-1-yl)benzenesulphonic acid	parent_chemical	254.266	organic	ionizable	5	5	0.707107		5	0	Swater (Avg. QSAR)	4	B(QSAR)	4	B(QSAR) V(QSAR avg.)	0.707107	(M4-5)	(P1-2)	(P1-2)	amph	amphoprotic	-	-	-	-1.27551	0.556279	Avg. QSAR	5	-1.27551	0.556279	4	536762	QSAR avg	5	536762	1.66389	6	4	B(QSAR)	-	-	-	4.29226e-09	QSAR avg.	1.72166e-12	QSAR avg.
p89-39-4	COc1ccc(c(c1)N(=O)=O)OC	1,4-dimethoxy-2-nitrobenzene	parent_chemical	183.165	organic	neutral	1	Transient	0.5		3	0.5	Swater (OECD & lit exp.)	2	B(QSAR)	1	V(QSAR avg.)	0	(M2-3)	(P3-4)	(P3-4)	N	N	-	-	-	1.88		OECD exp	4	1.89825	0.328791	5	176	OECD exp.	4	1335.74	1.32106	8	2	B(QSAR)	-	-	-	0.176927	QSAR avg.	0.000407199	QSAR avg.
p89-41-8,h93839-20-4	COc1ccc(cc1N(=O)=O)C(=O)O	3-nitro-p-anisic acid	hydrolysis_product,parent_chemical	197.148	organic	ionizable	3	3	0		5	0	Swater (Avg. QSAR)	2	B(QSAR)	2	B(QSAR)	0	(M2-3)	(P3-4)	(P3-4)	A	3.657	QSAR (SPARC)	-	-	0.257607	2.01737	Avg. QSAR	5	-2.27959	1.80132	5	1.50278e+09	QSAR avg	5	1.50278e+09	1.16568	8	2	B(QSAR)	-	-	-	0.00225673	QSAR avg.	1.01247e-07	QSAR avg.
p89-48-5	C[C@@H]1CC[C@H]([C@@H](C1)OC(=O)C)C(C)C	menthyl acetate	parent_chemical	198.307	organic	neutral	Transient	Transient	0.707107		3	0.707107	Swater (Avg. QSAR)	1	B(QSAR) H(OECD exp.)	1	B(QSAR) V(QSAR avg.) H(OECD exp.)	0	(M2-3)	(P1-2)	(P1-2)	N	N	-	-	-	3.65988	0.535179	Avg. QSAR	2	3.65988	0.535179	5	112.741	QSAR avg	3	112.741	1.07775	8	1	B(QSAR)	1	OECD exp.	-	26	OECD exp.	0.0288645	QSAR avg.
p89-57-6	Nc1ccc(c(c1)C(=O)O)O	5-aminosalicylic acid	parent_chemical	153.138	organic	ionizable	3	3	0.707107		5	0	Swater (Avg. QSAR)	2	B(QSAR)	2	B(QSAR)	0.707107	(M4-5)	(P1-2)	(P3-4)	amph	amphoprotic	-	-	-	-0.469507	1.94959	Avg. QSAR	5	-0.469507	1.94959	5	269243	QSAR avg	5	269243	2.38212	8	2	B(QSAR)	-	-	-	1.23488e-05	QSAR avg.	9.35196e-10	QSAR avg.
p89-58-7	Cc1ccc(c(c1)N(=O)=O)C	2-nitro-p-xylene	parent_chemical	151.166	organic	neutral	4	Transient	0.707107		3	0	Swater (Avg. QSAR)	4	B(QSAR)	1	V(QSAR avg.)	0.707107	(M2-3)	(P3-4)	(P3-4)	N	N	-	-	-	2.78735	0.163556	Avg. QSAR	3	2.78735	0.163556	5	288.196	QSAR avg	3	288.196	0.957012	8	4	B(QSAR)	-	-	-	6.06122	QSAR avg.	0.00153794	QSAR avg.
p89-62-3	Cc1ccc(c(c1)N(=O)=O)N	2-nitro-p-toluidine	parent_chemical	152.154	organic	neutral	4.5	4.5	0		4	0	Swater (Avg. QSAR)	4	B(QSAR)	4	B(QSAR) V(QSAR avg.)	0	(M2-3)	(P3-4)	(P3-4)	N	N	-	-	-	1.94133	0.662633	Avg. QSAR	4	1.94133	0.662633	5	1281.55	QSAR avg	4	1281.55	0.686436	8	4	B(QSAR)	-	-	-	0.0922998	QSAR avg.	3.42593e-06	QSAR avg.
p89-63-4	Clc1ccc(c(c1)N(=O)=O)N	4-chloro-2-nitroaniline	parent_chemical	172.572	organic	ionizable	4	4	0.5		3	0.5	Swater (OECD & lit exp.)	4	B(QSAR)	4	B(QSAR) V(QSAR avg.)	0	(M2-3)	(P3-4)	(P3-4)	B	3.71	QSAR (avg.)	-	-	2.6302		OECD exp	4	2.16785	0.39891	5	145.235	OECD exp.	3	971.47	0.718051	8	4	B(QSAR)	-	-	-	0.0578652	QSAR avg.	2.7445e-06	QSAR avg.
p89-65-6	OCC(C1OC(=C(C1=O)O)O)O	2,3-didehydro-D-erythro-hexono-1,4-lactone	parent_chemical	176.127	organic	ionizable	Unstable MOC	Unstable MOC	0		5	0	Swater (OECD & lit exp.)	1	B(QSAR)	1	B(QSAR)	0	(M4-5)	(P1-2)	(P1-2)	A	3.3722	QSAR (SPARC)	-	-	-3.16834	2.46284	Avg. QSAR	5	-5.81945	3.12525	5	1.69768e+12	OECD exp.	5	1.94355e+12	1.72546	8	1	B(QSAR)	-	-	-	8.7594e-08	QSAR avg.	9.87605e-08	QSAR avg.
p89-72-5	CCC(Oc1ccccc1)C	2-sec-butylphenol	parent_chemical	150.222	organic	neutral	Unstable MOC	Unstable MOC	0.816497		4	0.816497	Swater (OECD & lit exp.)	1	B(QSAR)	1	B(QSAR) V(QSAR avg.)	0	(M2-3)	(P3-4)	(P1-2)	N	N	-	-	-	3		OECD exp	2	3.36988	0.300578	5	1460	OECD exp.	3	220.352	1.15585	8	1	B(QSAR)	-	-	-	59.2138	QSAR avg.	0.300491	QSAR avg.
p89-75-8	Clc1ccc(c(c1)Cl)C(=O)Cl	2,4-dichlorobenzoyl chloride	parent_chemical	209.46	organic	neutral	4	Transient	0		3	0	Swater (Avg. QSAR)	4	B(QSAR)	1	V(QSAR avg.)	0	(M4-5)	(P3-4)	(P3-4)	N	N	-	-	-	3.20662	0.283377	Avg. QSAR	3	3.20662	0.283377	5	115.244	QSAR avg	3	115.244	1.48033	8	4	B(QSAR)	-	-	-	1.95541	QSAR avg.	0.00236837	QSAR avg.
p89-78-1,p2216-51-5	C[C@@H]1CC[C@H]([C@@H](C1)O)C(C)C	menthol:L-menthol	parent_chemical	156.27	organic	neutral	1	1	0.707107		3	0	Doc (PP-LFER)	2	B(QSAR)	2	B(QSAR)	0.707107	(M2-3)	(P1-2)	(P1-2)	N	N	-	2.05338	PP-LFER	3.00064	0.296663	Avg. QSAR	3	3.00064	0.296663	5	490	EPI exp.	3	564.012	0.488906	8	2	B(QSAR)	-	-	-	8.49121	EPIwin Exp.	0.000127194	PP-LFER
p89-79-2	C[C@@H]1CC[C@H]([C@@H](C1)O)C(=C)C	isopulegol	parent_chemical	154.254	organic	neutral	Unstable MOC	Unstable MOC	0.57735	exp	4	0.57735	Swater (OECD & lit exp.)	1	B(exp)	1	B(exp) V(QSAR avg.)	0	(M2-3)	(P1-2)	(P1-2)	N	N	-	-	-	2.4		OECD exp	3	2.74387	0.387683	5	3000	OECD exp.	4	1023.91	0.498033	8	1	B(exp)	-	-	-	1.49789	QSAR avg.	0.000317442	QSAR avg.
p89-83-8	Cc1ccc(c(c1)O)C(C)C	thymol	parent_chemical	150.222	organic	ionizable	1	1	0.707107		3	0	Doc (PP-LFER)	2	B(QSAR)	2	B(QSAR)	0.707107	(M2-3)	(P1-2)	(P1-2)	A	10.26	Exp (OECD)	2.12494	PP-LFER	3.1098	0	lit exp.	3	3.20591	0.113818	5	900	EPI exp.	3	726.312	0.598095	8	2	B(QSAR)	-	-	-	2.2	OECD exp.	1.97521e-05	EPI exp.
p89-87-2	Cc1ccc(c(c1)C)N(=O)=O	4-nitro-m-xylene	parent_chemical	151.166	organic	neutral	4	Transient	0.707107		3	0	Swater (Avg. QSAR)	4	B(QSAR)	1	V(QSAR avg.)	0.707107	(M4-5)	(P3-4)	(P3-4)	N	N	-	-	-	2.80862	0.120955	Avg. QSAR	3	2.80862	0.120955	5	264.691	QSAR avg	3	264.691	0.995608	8	4	B(QSAR)	-	-	-	7.63809	EPIwin Exp.	0.00145398	QSAR avg.
p89-97-4	NCc1ccccc1Cl	2-chlorobenzylamine	parent_chemical	141.601	organic	ionizable	3	3	0		5	0	Swater (Avg. QSAR)	2	B(QSAR)	2	B(QSAR)	0	(M2-3)	(P3-4)	(P3-4)	B	8.87702	QSAR (SPARC)	-	-	0.23336	1.43036	Avg. QSAR	5	-1.71745	1.75633	5	1.10428e+09	QSAR avg	5	1.10428e+09	1.62025	8	2	B(QSAR)	-	-	-	18.8887	QSAR avg.	1.63415e-05	QSAR avg.
p89-98-5,h88-66-4	O=Cc1ccccc1Cl	2-chlorobenzaldehyde	hydrolysis_product,parent_chemical	140.57	organic	neutral	2	2	0.866025		4	0.5	Swater (OECD & lit exp.)	2	B(QSAR)	2	B(QSAR) V(OECD exp.)	0.707107	(M2-3)	(P3-4)	(P3-4)	N	N	-	-	-	2.44		OECD exp	4	2.16086	0.193211	5	2690	OECD exp.	4	1152.61	0.63272	8	2	B(QSAR)	-	-	-	8.3	OECD exp.	0.000175062	OECD exp.
p90-02-8,h94-91-7	O=Cc1ccccc1O	salicylaldehyde	hydrolysis_product,parent_chemical	122.124	organic	ionizable	Unstable MOC	Unstable MOC	0		5	0	Doc (PP-LFER)	1	B(QSAR)	1	B(QSAR)	0	(M4-5)	(P1-2)	(P1-2)	A	8.37	Exp (CRC)	-0.215463	PP-LFER	0.169937		lit exp.	5	0.417537	0.485319	5	384114	QSAR avg	5	384114	0.74796	8	1	B(QSAR)	-	-	-	79	OECD exp.	0.000229419	EPI exp.
p90-04-0,h92-15-9,h135-62-6,h4531-49-1,h6358-31-2,h6528-34-3,h13515-40-7,h36968-27-1,h61847-48-1,h80675-49-6,h877670-90-1	COc1ccccc1N	o-anisidine	hydrolysis_product,parent_chemical	123.156	organic	ionizable	Unstable MOC	Unstable MOC	0		5	0	Doc (PP-LFER)	1	B(exp)	1	B(exp)	0	(M2-3)	(P3-4)	(P3-4)	B	4.53	Exp (CRC)	0.42261	PP-LFER	0.51769		OECD exp	5	0.359187	0.353821	5	61438.2	OECD exp.	5	56051.7	0.962478	8	1	B(exp)	-	-	-	10	OECD exp.	3.55058e-05	OECD exp.
p90-05-1	COc1ccccc1O	guaiacol	parent_chemical	124.14	organic	ionizable	Unstable MOC	Unstable MOC	0		5	0	Doc (PP-LFER)	1	B(QSAR)	1	B(QSAR)	0	(M4-5)	(P1-2)	(P1-2)	A	9.98	Exp (CRC)	0.560315	PP-LFER	1.00885	0	lit exp.	5	1.17917	0.235618	5	18700	EPI exp.	5	25145.3	0.744982	8	1	B(QSAR)	-	-	-	14	OECD exp.	4.43983e-05	OECD exp.
p90-12-0	Cc1cccc2c1cccc2	1-methylnaphthalene	parent_chemical	142.202	organic	neutral	1	Transient	0.57735		3	0.57735	Doc (PP-LFER)	2	B(QSAR)	1	V(Lit exp.)	0	(M2-3)	(P3-4)	(P3-4)	N	N	-	2.96828	PP-LFER	3.87	5.43896e-16	lit exp.	2	3.63238	0.279599	5	25	EPI exp.	2	20.1029	0.56887	8	2	B(QSAR)	-	-	-	8.84	Lit. Exp.	0.0162181	Lit exp.
p90-17-5	CC(=O)OC(C(Cl)(Cl)Cl)c1ccccc1	2,2,2-trichloro-1-phenylethyl acetate	parent_chemical	267.541	organic	neutral	4	Transient	0.707107		2	0	Swater (Avg. QSAR)	4	B(QSAR) H(OECD exp.)	1	V(QSAR avg.)	0.707107	(M2-3)	(P3-4)	(P3-4)	N	N	-	-	-	3.5		OECD exp	2	3.57769	0.324777	5	28.3513	QSAR avg	2	28.3513	0.965138	8	4	B(QSAR)	4	OECD exp.	-	0.310751	QSAR avg.	0.000605481	QSAR avg.
p90-20-0	Nc1cc(cc2c1c(O)cc(c2)S(=O)(=O)O)S(=O)(=O)O	4-amino-5-hydroxynaphthalene-2,7-disulphonic acid	parent_chemical	319.313	organic	ionizable	5	5	0		5	0	Swater (Avg. QSAR)	4	B(QSAR)	4	B(QSAR) V(QSAR avg.)	0	(M4-5)	(P3-4)	(P3-4)	amph	amphoprotic	-	-	-	-3.72065	1.86532	Avg. QSAR	5	-3.72065	1.86532	4	214463	QSAR avg	5	214463	1.99238	5	4	B(QSAR)	-	-	-	9.87753e-15	QSAR avg.	1.72575e-22	QSAR avg.
p90-30-2	c1ccc(cc1)Nc1cccc2c1cccc2	N-1-naphthylaniline	parent_chemical	219.288	organic	ionizable	4	4	0.912871		3	0.57735	Doc (OECD & lit exp.)	4	B(QSAR)	4	B(QSAR) V(QSAR avg.) PT(exp.)	0.707107	(M1)	(P3-4)	(P3-4)	B	4.93	Exp (OECD)	2.24876	OECD exp.	4.4043	0.452096	Avg. QSAR	2	4.013	0.453811	5	60	EPI exp.	2	18.6878	1.5981	8	4	B(QSAR)	-	-	4	0.00203861	QSAR avg.	6.41435e-06	QSAR avg.
p90-31-3	Clc1cccc(c1)n1[nH]c(cc1=O)C	2-(3-chlorophenyl)-2,4-dihydro-5-methyl-3H-pyrazol-3-one	parent_chemical	208.649	organic	ionizable	5	5	0		5	0	Swater (Avg. QSAR)	4	B(QSAR)	4	B(QSAR) V(QSAR avg.)	0	(M4-5)	(P3-4)	(P1-2)	A	7.73425	QSAR (avg.)	-	-	1.01669	0.475106	Avg. QSAR	5	0.449669	1.22134	4	9.17355e+06	QSAR avg	5	9.17355e+06	2.38173	6	4	B(QSAR)	-	-	-	0.000715821	QSAR avg.	9.20129e-09	QSAR avg.
p90-43-7	Oc1ccccc1c1ccccc1	biphenyl-2-ol	parent_chemical	170.212	organic	ionizable	Unstable MOC	Unstable MOC	0.957427	exp	4	0.957427	Doc (OECD & lit exp.)	1	B(exp)	1	B(exp) PT(exp.)	0	(M2-3)	(P1-2)	(P1-2)	A	9.5	Exp (OECD)	1.92067	OECD exp.	2.47067	0	lit exp.	3	2.92681	0.186149	5	700	EPI exp.	3	892.289	0.784056	8	1	B(exp)	-	-	1	0.906	OECD exp.	4.29394e-05	EPI exp.
p90-51-7	Nc1ccc2c(c1)c(O)cc(c2)S(=O)(=O)O	6-amino-4-hydroxynaphthalene-2-sulphonic acid	parent_chemical	239.251	organic	ionizable	5	5	0.707107		5	0	Swater (Avg. QSAR)	4	B(QSAR)	4	B(QSAR) V(QSAR avg.)	0.707107	(M4-5)	(P3-4)	(P3-4)	amph	amphoprotic	-	-	-	-1.82081	0.6067	Avg. QSAR	5	-1.82081	0.6067	4	229816	QSAR avg	5	229816	1.68895	6	4	B(QSAR)	-	-	-	3.26585e-09	QSAR avg.	3.69278e-16	QSAR avg.
p90-72-2	CN(Cc1cc(CN(C)C)c(c(c1)CN(C)C)O)C	2,4,6-tris(dimethylaminomethyl)phenol	parent_chemical	265.401	organic	ionizable	5	5	0		5	0	Swater (Avg. QSAR)	4	B(QSAR)	4	B(QSAR) V(QSAR avg.)	0	(M2-3)	(P3-4)	(P3-4)	amph	amphoprotic	-	-	-	-2.25418	4.04643	Avg. QSAR	5	-2.25418	4.04643	5	1.88848e+06	QSAR avg	5	1.88848e+06	2.18478	8	4	B(QSAR)	-	-	-	7.5	OECD exp.	1.74915e-13	QSAR avg.
p90-80-2	OC[C@H]1OC(=O)[C@@H]([C@H]([C@@H]1O)O)O	D-glucono-1,5-lactone	parent_chemical	178.143	organic	neutral	Unstable MOC	Unstable MOC	0		5	0	Swater (EPI exp.)	1	B(QSAR) H(LHC QSAR)	1	B(QSAR) H(LHC QSAR)	0	(M4-5)	(P1-2)	(P1-2)	N	N	-	-	-	-2.84632	1.20736	Avg. QSAR	5	-2.84632	1.20736	5	590000	EPI exp.	5	1.96558e+06	1.97046	8	1	B(QSAR)	1	LHC QSAR	-	1.83958e-07	QSAR avg.	2.82173e-08	QSAR avg.
p90-82-4,s50-98-6	CNC(C(c1ccccc1)O)C	pseudoephedrine:ephedrine hydrochloride	parent_chemical,salt_or_mixture_component	165.237	organic	ionizable	Unstable MOC	Unstable MOC	0	exp	5	0	Swater (EPI exp.)	1	B(exp)	1	B(exp)	0	(M2-3)	(P1-2)	(P3-4)	B	9.73	Exp (Liao et al (2009))	-	-	-0.296366	1.1802	Avg. QSAR	5	-2.58837	2.28201	5	63600	EPI exp.	5	6.42343e+10	1.54226	8	1	B(exp)	-	-	-	0.032	OECD exp.	2.92077e-08	QSAR avg.
p91-15-6	N#Cc1ccccc1C#N	phthalonitrile	parent_chemical	128.134	organic	neutral	1	1	0.912871		3	0.57735	Doc (OECD & lit exp.)	2	B(QSAR)	2	B(QSAR)	0.707107	(M2-3)	(P1-2)	(P3-4)	N	N	-	2.5	OECD exp.	1.41857	0.232932	Avg. QSAR	4	1.41857	0.232932	5	395	EPI exp.	4	3306.6	1.32005	8	2	B(QSAR)	-	-	-	0.3989	OECD exp.	1.4214e-05	QSAR avg.
p91-16-7	COc1ccccc1OC	veratrole	parent_chemical	138.167	organic	neutral	Unstable MOC	Unstable MOC	0.707107		5	0.707107	Swater (Avg. QSAR)	1	B(QSAR)	1	B(QSAR) V(QSAR avg.)	0	(M2-3)	(P3-4)	(P3-4)	N	N	-	-	-	1.06		lit exp.	4	1.61562	0.424818	5	15138.5	QSAR avg	5	15138.5	2.15016	8	1	B(QSAR)	-	-	-	96	OECD exp.	0.048527	QSAR avg.
p91-17-8	C1CCC2C(C1)CCCC2	decahydronaphthalene	parent_chemical	138.254	organic	neutral	Transient	Transient	0.707107		2	0	Doc (PP-LFER)	2	B(QSAR)	1	V(OECD exp.)	0.707107	(M2-3)	(P1-2)	(P1-2)	N	N	-	4.07658	PP-LFER	4.32387	0.638011	Avg. QSAR	2	4.32387	0.638011	5	0.889	EPI exp.	2	10.4318	1.8674	8	2	B(QSAR)	-	-	-	93.7	OECD exp.	4.70887	OECD exp.
p91-20-3	c1ccc2c(c1)cccc2	naphthalene	parent_chemical	128.175	organic	neutral	4	Transient	1.5		3	0.5	Doc (PP-LFER)	4	B(QSAR)	1	V(OECD exp.)	1.41421	(M2-3)	(P3-4)	(P3-4)	N	N	-	2.53934	PP-LFER	3.3125	0.025	lit exp.	3	3.13979	0.293346	5	31.7	OECD exp.	3	64.2622	0.640801	8	4	B(QSAR)	-	-	-	10.5	OECD exp.	0.0171359	OECD exp.
p91-21-4	N1CCc2c(C1)cccc2	1,2,3,4-tetrahydroisoquinoline	parent_chemical	133.194	organic	ionizable	3	3	0.707107		5	0	Doc (OECD & lit exp.)	2	B(QSAR)	2	B(QSAR)	0.707107	(M2-3)	(P1-2)	(P3-4)	B	9.26152	QSAR (SPARC)	-3.41152	OECD exp.	0.09495	1.71661	Avg. QSAR	5	-2.00966	1.54271	5	1.78955e+09	QSAR avg	5	1.78955e+09	1.29882	8	2	B(QSAR)	-	-	-	7.99379	QSAR avg.	1.81801e-05	QSAR avg.
p91-22-5	c1ccc2c(c1)nccc2	quinoline	parent_chemical	129.162	organic	ionizable	1	Transient	1.22474		3	1	Doc (OECD & lit exp.)	2	B(QSAR)	1	PT(exp.)	0.707107	(M2-3)	(P3-4)	(P3-4)	B	4.81946	Exp (OECD (average))	2.32926	OECD exp.	1.69318	0.565379	Avg. QSAR	4	1.34088	0.47711	5	6110	EPI exp.	5	25665.4	1.01574	8	2	B(QSAR)	-	-	1	7.94	Lit. Exp.	6.30957e-05	Lit exp.
p91-35-0	OC(=O)c1ccccc1NS(=O)(=O)c1ccc(c(c1)N)O	2-[[(3-amino-4-hydroxyphenyl)sulphonyl]amino]benzoic acid	parent_chemical	308.314	organic	ionizable	5	5	0.707107		5	0	Swater (Avg. QSAR)	4	B(QSAR)	4	B(QSAR) V(QSAR avg.)	0.707107	(M4-5)	(P3-4)	(P3-4)	amph	amphoprotic	-	-	-	-0.0669239	3.38132	Avg. QSAR	5	-0.0669239	3.38132	5	13259.3	QSAR avg	5	13259.3	1.58616	8	4	B(QSAR)	-	-	-	5.11015e-10	QSAR avg.	4.02814e-12	QSAR avg.
p91-57-6	Cc1ccc2c(c1)cccc2	2-methylnaphthalene	parent_chemical	142.202	organic	neutral	1	Transient	0.57735		3	0.57735	Doc (PP-LFER)	2	B(QSAR)	1	V(EPI exp.)	0	(M2-3)	(P3-4)	(P3-4)	N	N	-	2.89558	PP-LFER	3.86	0	lit exp.	2	3.65425	0.305085	5	24.6	EPI exp.	2	19.7888	0.602021	8	2	B(QSAR)	-	-	-	7.3315	EPIwin Exp.	0.0211834	EPI exp.
p91-64-5	O=c1ccc2c(o1)cccc2	coumarin	parent_chemical	146.147	organic	neutral	Unstable MOC	Unstable MOC	0	exp	4	0	Swater (OECD & lit exp.)	1	B(exp)	1	B(exp)	0	(M2-3)	(P3-4)	(P1-2)	N	N	-	-	-	1.39		OECD exp	4	1.76942	0.180474	4	1900	OECD exp.	4	1376	1.36894	6	1	B(exp)	-	-	-	0.13067	OECD exp.	4.05681e-06	OECD exp.
p91-66-7	CCN(c1ccccc1)CC	N,N-diethylaniline	parent_chemical	149.237	organic	ionizable	4	Transient	0.707107		3	0	Swater (EPI exp.)	3	B(QSAR)	1	V(EPI exp.)	0.707107	(M2-3)	(P3-4)	(P3-4)	B	10.6308	Exp (OECD)	-	-	-6.09078		OECD exp	5	-0.941939	2.4114	5	140	EPI exp.	5	1.47975e+09	1.48104	8	3	B(QSAR)	-	-	-	18.1288	EPIwin Exp.	0.00785177	EPI exp.
p91-68-9	CCN(c1cccc(c1)O)CC	3-diethylaminophenol	parent_chemical	165.237	organic	ionizable	5	5	2.19848		5	2.08167	Swater (Avg. QSAR)	3	B(QSAR)	3	B(QSAR)	0.707107	(M2-3)	(P3-4)	(P1-2)	amph	amphoprotic	-	-	-	8.5		OECD exp	4	1.64073	0.904862	5	15235.5	QSAR avg	5	15235.5	1.64077	8	3	B(QSAR)	-	-	-	0.0768631	QSAR avg.	6.84032e-07	QSAR avg.
p91-76-9	Nc1nc(N)nc(n1)c1ccccc1	6-phenyl-1,3,5-triazine-2,4-diyldiamine	parent_chemical	187.205	organic	ionizable	4.5	4.5	0.5		4	0.5	Doc (OECD & lit exp.)	4	B(QSAR)	4	B(QSAR) V(QSAR avg.)	0	(M2-3)	(P1-2)	(P1-2)	amph	amphoprotic	-	1.403	OECD exp.	1.36		OECD exp	5	0.883754	0.692613	5	600	EPI exp.	4	1898.81	0.797351	8	4	B(QSAR)	-	-	-	1.08193e-05	QSAR avg.	9.16089e-10	QSAR avg.
p91-96-3	O=C(Nc1ccc(cc1C)c1ccc(c(c1)C)NC(=O)CC(=O)C)CC(=O)C	N,N'-(3,3'-dimethylbiphenyl-4,4'-ylene)di(acetoacetamide)	parent_chemical	380.446	organic	ionizable	4.5	4.5	1.58114		4	0.707107	Swater (Avg. QSAR)	4	B(QSAR)	4	B(QSAR) V(QSAR avg.)	1.41421	(M4-5)	(P1-2)	(P3-4)	amph	amphoprotic	-	-	-	2.32183	1.36876	Avg. QSAR	3	2.32183	1.36876	5	4497.7	QSAR avg	4	4497.7	2.60737	8	4	B(QSAR)	-	-	-	7.53145e-05	QSAR avg.	1.34134e-15	QSAR avg.
p91-97-4	O=C=Nc1ccc(cc1C)c1ccc(c(c1)C)N=C=O	3,3'-dimethylbiphenyl-4,4'-diyl diisocyanate	parent_chemical	264.285	organic	neutral	Transient	Transient	1.22474		1	1	Doc (OECD & lit exp.)	1	H(LHC QSAR)	1	H(LHC QSAR)	0.707107	(M4-5)	(P3-4)	(P3-4)	N	N	-	5.44	OECD exp.	4.10959	1.33028	Avg. QSAR	2	4.10959	1.33028	5	247.003	QSAR avg	3	247.003	2.63104	8	4	B(QSAR)	1	LHC QSAR	-	0.00154915	QSAR avg.	1.92029e-05	QSAR avg.
p92-15-9	COc1ccccc1NC(=O)CC(=O)C	2'-methoxyacetoacetanilide	parent_chemical	207.231	organic	ionizable	2	2	0.866025		4	0.5	Swater (OECD & lit exp.)	2	B(QSAR)	2	B(QSAR)	0.707107	(M4-5)	(P3-4)	(P3-4)	amph	amphoprotic	-	-	-	0.91		OECD exp	5	0.789279	0.237372	5	3240	OECD exp.	5	10350.3	0.857623	8	2	B(QSAR)	-	-	-	0.000730389	QSAR avg.	3.93042e-10	QSAR avg.
p92-36-4	Nc1ccc(cc1)c1nc2c(s1)cc(cc2)C	4-(6-methylbenzothiazol-2-yl)aniline	parent_chemical	240.328	organic	ionizable	4	4	0		2	0	Swater (Avg. QSAR)	4	B(QSAR)	4	B(QSAR) V(QSAR avg.)	0	(M2-3)	(P3-4)	(P3-4)	B	3.92224	QSAR (SPARC)	-	-	3.5097	0.163595	Avg. QSAR	2	3.40415	0.232387	5	16.7301	QSAR avg	2	16.7301	0.958476	8	4	B(QSAR)	-	-	-	1.40244e-06	QSAR avg.	5.10958e-10	QSAR avg.
p92-52-4	c1ccc(cc1)c1ccccc1	biphenyl	parent_chemical	154.213	organic	neutral	Transient	Transient	0		2	0	Doc (PP-LFER)	1	B(exp)	1	B(exp) V(Lit exp.)	0	(M2-3)	(P1-2)	(P1-2)	N	N	-	3.01776	PP-LFER	3.995	0.0675771	lit exp.	2	3.79448	0.334716	5	6.94	EPI exp.	2	17.6796	0.603495	8	1	B(exp)	-	-	-	1.19	OECD exp.	0.0112202	Lit exp.
p92-54-6	N1CCN(CC1)c1ccccc1	N-phenylpiperazine	parent_chemical	162.236	organic	ionizable	5	5	0.707107		5	0	Swater (Avg. QSAR)	3	B(QSAR)	3	B(QSAR)	0.707107	(M2-3)	(P3-4)	(P3-4)	B	9.29526	QSAR (SPARC)	-	-	-0.398413	1.85791	Avg. QSAR	5	-2.51652	1.13689	5	9.42608e+09	QSAR avg	5	9.42608e+09	1.63606	8	3	B(QSAR)	-	-	-	0.726485	EPIwin Exp.	8.20005e-07	QSAR avg.
p92-55-7	CC(=O)OC(c1ccc(o1)N(=O)=O)OC(=O)C	5-nitrofurfurylidene di(acetate)	parent_chemical	243.174	organic	neutral	2	2	1		4	0.707107	Swater (Avg. QSAR)	2	B(QSAR) H(Hydrowin)	2	B(QSAR) H(Hydrowin)	0.707107	(M4-5)	(P1-2)	(P1-2)	N	N	-	-	-	0.86247	0.263167	Avg. QSAR	5	0.86247	0.263167	5	9271.59	QSAR avg	4	9271.59	1.60874	8	2	B(QSAR)	2	Hydrowin	-	0.233452	QSAR avg.	6.25375e-07	QSAR avg.
p92-69-3	Oc1ccc(cc1)c1ccccc1	biphenyl-4-ol	parent_chemical	170.212	organic	ionizable	2	2	1.08012		4	0.816497	Doc (OECD & lit exp.)	2	B(QSAR)	2	B(QSAR)	0.707107	(M2-3)	(P1-2)	(P1-2)	A	9.5	Exp (OECD)	1.81067	OECD exp.	2.98067		OECD exp	3	2.93519	0.252718	5	56.2	EPI exp.	3	762.635	0.766602	8	2	B(QSAR)	-	-	-	26000	OECD exp.	3.35043e-06	QSAR avg.
p92-70-6,h92-72-8,h92-74-0,h92-77-3,h92-78-4,h92-79-5,h135-61-5,h135-62-6,h135-63-7,h3905-19-9,h4273-92-1,h4711-68-6,h41506-62-1	OC(=O)c1cc2ccccc2cc1O	3-hydroxy-2-naphthoic acid	hydrolysis_product,parent_chemical	188.184	organic	ionizable	Unstable MOC	Unstable MOC	0		5	0	Doc (OECD & lit exp.)	1	B(QSAR)	1	B(QSAR)	0	(M4-5)	(P3-4)	(P3-4)	A	2.79	Exp (OECD)	-4.785	OECD exp.	1.33752	2.09709	Avg. QSAR	5	-1.54648	1.91053	5	4.19394e+09	QSAR avg	5	4.19394e+09	1.18987	8	1	B(QSAR)	-	-	-	8.58335e-06	QSAR avg.	2.61047e-08	QSAR avg.
p92-72-8	COc1cc(OC)c(cc1NC(=O)c1cc2ccccc2cc1O)Cl	5'-chloro-3-hydroxy-2',4'-dimethoxy-2-naphthanilide	parent_chemical	357.796	organic	ionizable	4	4	1.52753		3	0.57735	Swater (Avg. QSAR)	4	B(QSAR)	4	B(QSAR) V(QSAR avg.)	1.41421	(M2-3)	(P3-4)	(P3-4)	amph	amphoprotic	-	-	-	2.97		OECD exp	2	3.4589	1.0338	5	130.311	QSAR avg	3	130.311	2.1999	8	4	B(QSAR)	-	-	-	5.196e-11	QSAR avg.	1.02107e-12	QSAR avg.
p92-74-0	CCOc1ccccc1NC(=O)c1cc2ccccc2cc1O	2'-ethoxy-3-hydroxy-2-naphthanilide	parent_chemical	307.351	organic	ionizable	4	4	1.52753		3	0.57735	Swater (Avg. QSAR)	3	B(QSAR)	3	B(QSAR)	1.41421	(M2-3)	(P3-4)	(P3-4)	amph	amphoprotic	-	-	-	2.87		OECD exp	2	3.23266	0.885701	5	78.5769	QSAR avg	3	78.5769	1.5865	8	3	B(QSAR)	-	-	-	6.17617e-10	QSAR avg.	2.69626e-11	QSAR avg.
p92-77-3	O=C(c1cc2ccccc2cc1O)Nc1ccccc1	3-hydroxy-2-naphthanilide	parent_chemical	263.298	organic	ionizable	4	4	1.58114		3	0.707107	Swater (Avg. QSAR)	3	B(QSAR)	3	B(QSAR)	1.41421	(M2-3)	(P3-4)	(P3-4)	amph	amphoprotic	-	-	-	3.26012	1.04051	Avg. QSAR	2	3.26012	1.04051	5	89.2649	QSAR avg	3	89.2649	2.05355	8	3	B(QSAR)	-	-	-	6.62949e-09	QSAR avg.	5.15113e-10	QSAR avg.
p92-78-4	Clc1ccc(cc1)NC(=O)c1cc2ccccc2cc1O	4'-chloro-3-hydroxy-2-naphthanilide	parent_chemical	297.743	organic	ionizable	4	4	1.41421		2	0	Swater (Avg. QSAR)	4	B(QSAR)	4	B(QSAR) V(QSAR avg.)	1.41421	(M2-3)	(P3-4)	(P3-4)	amph	amphoprotic	-	-	-	3.84965	1.02697	Avg. QSAR	2	3.84965	1.02697	5	26.3901	QSAR avg	2	26.3901	1.58937	8	4	B(QSAR)	-	-	-	2.1347e-09	QSAR avg.	2.80502e-10	QSAR avg.
p92-79-5	COc1ccc(cc1)NC(=O)c1cc2ccccc2cc1O	3-hydroxy-4'-methoxy-2-naphthanilide	parent_chemical	293.324	organic	ionizable	4	4	1.41421		3	0	Swater (Avg. QSAR)	3	B(QSAR)	3	B(QSAR)	1.41421	(M4-5)	(P3-4)	(P3-4)	amph	amphoprotic	-	-	-	2.9		OECD exp	3	3.07384	1.08385	5	122.52	QSAR avg	3	122.52	1.72634	8	3	B(QSAR)	-	-	-	1.3837e-09	QSAR avg.	2.32126e-11	QSAR avg.
p92-84-2	c1ccc2c(c1)Sc1c(N2)cccc1	phenothiazine	parent_chemical	199.276	organic	neutral	4	4	0.707107		2	0	Doc (OECD & lit exp.)	4	B(QSAR)	4	B(QSAR) V(QSAR avg.)	0.707107	(M2-3)	(P1-2)	(P3-4)	N	N	-	3.76	OECD exp.	3.7572	0.11605	Avg. QSAR	2	3.7572	0.11605	5	1.59	EPI exp.	2	18.1496	1.07923	8	4	B(QSAR)	-	-	-	5.8547e-05	QSAR avg.	7.64973e-07	QSAR avg.
p92-88-6,h147263-99-8	Oc1ccc(cc1)c1ccc(cc1)O	biphenyl-4,4'-diol	hydrolysis_product,parent_chemical	186.212	organic	ionizable	1	1	1.22474		3	1	Swater (OECD & lit exp.)	2	B(QSAR)	2	B(QSAR)	0.707107	(M2-3)	(P1-2)	(P1-2)	A	9.44595	QSAR (SPARC)	-	-	2.5482	0.495004	Avg. QSAR	3	2.2838	0.220205	5	154.393	OECD exp.	4	4424.72	1.02049	8	2	B(QSAR)	-	-	-	6.20857e-05	QSAR avg.	6.70225e-10	QSAR avg.
p93-01-6	Oc1ccc2c(c1)ccc(c2)S(=O)(=O)O	6-hydroxynaphthalene-2-sulphonic acid	parent_chemical	224.236	organic	ionizable	5	5	1.41421		5	0	Swater (Avg. QSAR)	4	B(QSAR)	4	B(QSAR) V(QSAR avg.)	1.41421	(M4-5)	(P3-4)	(P3-4)	A	0.641834	QSAR (SPARC)	-	-	-1.0446	0.54928	Avg. QSAR	5	-3.38414	4.31401	4	4.9967e+14	QSAR avg	5	4.9967e+14	1.9799	5	4	B(QSAR)	-	-	-	4.1323e-07	QSAR avg.	1.0469e-12	QSAR avg.
p93-04-9	COc1ccc2c(c1)cccc2	methyl 2-naphthyl ether	parent_chemical	158.201	organic	neutral	Transient	Transient	1.1547		3	1.1547	Swater (Avg. QSAR)	1	B(QSAR)	1	B(QSAR) V(QSAR avg.)	0	(M2-3)	(P3-4)	(P3-4)	N	N	-	-	-	0.477		OECD exp	3	3.16913	0.389885	5	50.9012	QSAR avg	3	50.9012	0.507457	8	1	B(QSAR)	-	-	-	1.386	OECD exp.	0.00503353	QSAR avg.
p93-07-2,h69788-75-6	COc1cc(ccc1OC)C(=O)O	veratric acid	hydrolysis_product,parent_chemical	182.177	organic	ionizable	Transient	Transient	0		3	0	Swater (EPI exp.)	1	B(QSAR)	1	B(QSAR)	0	(M4-5)	(P3-4)	(P3-4)	A	4.27208	QSAR (SPARC)	-	-	-0.150137	1.72554	Avg. QSAR	5	-2.44131	1.78298	5	465	EPI exp.	5	1.06032e+09	0.903603	8	1	B(QSAR)	-	-	-	0.0329251	EPIwin Exp.	4.24899e-07	QSAR avg.
p93-08-3	CC(=O)c1ccc2c(c1)cccc2	2'-acetonaphthone	parent_chemical	170.212	organic	neutral	1	1	0		3	0	Swater (EPI exp.)	2	B(QSAR)	2	B(QSAR)	0	(M2-3)	(P3-4)	(P3-4)	N	N	-	-	-	2.75817	0.242361	Avg. QSAR	3	2.75817	0.242361	5	272	EPI exp.	3	114.445	0.680991	8	2	B(QSAR)	-	-	-	0.0814463	EPIwin Exp.	3.1533e-05	QSAR avg.
p93-17-4	N#CCc1ccc(c(c1)OC)OC	3,4-dimethoxyphenylacetonitrile	parent_chemical	177.204	organic	neutral	Unstable MOC	Unstable MOC	0.57735	exp	4	0.57735	Doc (OECD & lit exp.)	1	B(exp)	1	B(exp)	0	(M2-3)	(P3-4)	(P3-4)	N	N	-	1.87	OECD exp.	0.91		OECD exp	4	1.32405	0.408606	5	20640.8	QSAR avg	5	20640.8	2.42645	8	1	B(exp)	3	LHC QSAR	-	0.0861552	QSAR avg.	1.86377e-07	QSAR avg.
p93-20-9	OCCOc1ccc2c(c1)cccc2	2-(2-naphthyloxy)ethanol	parent_chemical	188.228	organic	neutral	Transient	Transient	0		3	0	Swater (Avg. QSAR)	1	B(QSAR)	1	B(QSAR)	0	(M2-3)	(P3-4)	(P3-4)	N	N	-	-	-	2.48409	0.478357	Avg. QSAR	3	2.48409	0.478357	5	473.514	QSAR avg	3	473.514	1.31289	8	1	B(QSAR)	-	-	-	0.000297	OECD exp.	2.50997e-07	QSAR avg.
p93-55-0	CCC(=O)c1ccccc1	propiophenone	parent_chemical	134.179	organic	neutral	Unstable MOC	Unstable MOC	0		4	0	Swater (OECD & lit exp.)	1	B(QSAR)	1	B(QSAR) V(OECD exp.)	0	(M2-3)	(P1-2)	(P1-2)	N	N	-	-	-	2.19		OECD exp	4	2.15612	0.0923309	5	2000	OECD exp.	4	1315.6	0.473213	8	1	B(QSAR)	-	-	-	22.61	OECD exp.	0.00061225	OECD exp.
p93-58-3	COC(=O)c1ccccc1	methyl benzoate	parent_chemical	136.151	organic	neutral	Transient	Transient	0.57735		3	0.57735	Doc (OECD & lit exp.)	1	B(QSAR)	1	B(QSAR) V(Lit exp.)	0	(M2-3)	(P1-2)	(P1-2)	N	N	-	2.13333	OECD exp.	2.12	0	lit exp.	4	1.82722	0.111255	5	2100	EPI exp.	4	2584.23	0.457165	8	1	B(QSAR)	4	Hydrowin	-	50.54	OECD exp.	0.00131826	Lit exp.
p93-67-4	Clc1ccc(c(c1)N)Oc1ccccc1	5-chloro-2-phenoxyaniline	parent_chemical	219.672	organic	neutral	4	4	0.707107		2	0	Swater (Avg. QSAR)	4	B(QSAR)	4	B(QSAR) V(QSAR avg.)	0.707107	(M1)	(P3-4)	(P3-4)	N	N	-	-	-	3.31898	0.405703	Avg. QSAR	2	3.31898	0.405703	5	43.4953	QSAR avg	2	43.4953	0.782909	8	4	B(QSAR)	-	-	-	0.00484665	QSAR avg.	3.6655e-06	QSAR avg.
p93-68-5	O=C(Nc1ccccc1C)CC(=O)C	2'-methylacetoacetanilide	parent_chemical	191.231	organic	ionizable	2	2	0.866025		4	0.5	Swater (OECD & lit exp.)	2	B(QSAR)	2	B(QSAR)	0.707107	(M4-5)	(P1-2)	(P1-2)	amph	amphoprotic	-	-	-	0.85		OECD exp	4	1.32961	0.567596	5	3000	OECD exp.	4	4394.8	0.854448	8	2	B(QSAR)	-	-	-	0.00014	OECD exp.	3.60196e-09	OECD exp.
p93-69-6	NC(=N/C(=N/c1ccccc1C)/N)N	1-o-tolylbiguanide	parent_chemical	191.237	organic	ionizable	3	3	0.707107		5	0	Swater (Avg. QSAR)	2	H(LHC QSAR)	2	H(LHC QSAR)	0.707107	(M4-5)	(P3-4)	(P3-4)	B	11.8727	QSAR (SPARC)	-	-	-0.717671	1.16383	Avg. QSAR	5	-3.86676	4.29753	5	1.31261e+13	QSAR avg	5	1.31261e+13	2.09959	8	3	B(QSAR)	2	LHC QSAR	-	0.00228592	QSAR avg.	2.38155e-11	QSAR avg.
p93-70-9	O=C(Nc1ccccc1Cl)CC(=O)C	2'-chloroacetoacetanilide	parent_chemical	211.649	organic	ionizable	1	1	0.57735		3	0.57735	Swater (OECD & lit exp.)	2	B(QSAR)	2	B(QSAR)	0	(M2-3)	(P3-4)	(P3-4)	amph	amphoprotic	-	-	-	1.46004	0.617824	Avg. QSAR	4	1.46004	0.617824	5	890	OECD exp.	4	4830.97	1.34675	8	2	B(QSAR)	-	-	-	0.00024	OECD exp.	2.30362e-08	OECD exp.
p93-84-5	O=N(=O)c1ccc2c(c1)[nH]c(=O)[nH]2	1,3-dihydro-5-nitro-2H-benzimidazol-2-one	parent_chemical	179.136	organic	ionizable	4	4	1.08012		3	0.816497	Swater (OECD & lit exp.)	4	B(QSAR)	4	B(QSAR) V(QSAR avg.)	0.707107	(M4-5)	(P3-4)	(P1-2)	A	10.7738	QSAR (avg.)	-	-	1.28243		OECD exp	5	0.78161	0.2827	4	111.344	OECD exp.	4	2091.13	0.9144	6	4	B(QSAR)	-	-	-	0.000503874	QSAR avg.	8.13803e-11	QSAR avg.
p93-92-5	CC(c1ccccc1)OC(=O)C	1-phenylethyl acetate	parent_chemical	164.205	organic	neutral	Transient	Transient	0.57735	exp	3	0.57735	Doc (OECD & lit exp.)	1	B(exp)	1	B(exp) V(QSAR avg.)	0	(M2-3)	(P1-2)	(P1-2)	N	N	-	2.41	OECD exp.	2.27661	0.257526	Avg. QSAR	3	2.27661	0.257526	5	1123.36	QSAR avg	4	1123.36	0.951165	8	1	B(exp)	4	Hydrowin	-	22.9562	QSAR avg.	0.00134811	QSAR avg.
p94-04-2	CCCCC(C(=O)OC=C)CC	vinyl 2-ethylhexanoate	parent_chemical	170.253	organic	neutral	Transient	Transient	0.57735		2	0.57735	Swater (OECD & lit exp.)	1	B(QSAR)	1	B(QSAR) V(OECD exp.)	0	(M2-3)	(P1-2)	(P1-2)	N	N	-	-	-	3.44231	0.221347	Avg. QSAR	2	3.44231	0.221347	5	12	OECD exp.	3	135.951	0.710556	8	1	B(QSAR)	4	OECD exp.	-	95	OECD exp.	0.544016	OECD exp.
p94-05-3	CCO/C=C(\C(=O)OCC)/C#N	ethyl 2-cyano-3-ethoxyacrylate	parent_chemical	169.181	organic	neutral	Unstable MOC	Unstable MOC	0		5	0	Swater (Avg. QSAR)	1	B(QSAR)	1	B(QSAR)	0	(M4-5)	(P1-2)	(P1-2)	N	N	-	-	-	1.20466	0.533409	Avg. QSAR	5	1.20466	0.533409	5	77094.3	QSAR avg	5	77094.3	2.35297	8	1	B(QSAR)	4	Hydrowin	-	6.62982	QSAR avg.	9.86673e-05	QSAR avg.
p94-13-3	CCCOC(=O)c1ccc(cc1)O	propyl 4-hydroxybenzoate	parent_chemical	180.205	organic	ionizable	Transient	Transient	0.707107	exp	3	0.707107	Swater (EPI exp.)	1	B(exp)	1	B(exp)	0	(M2-3)	(P1-2)	(P1-2)	A	8.515	Exp (OECD (average))	-	-	1.54101		lit exp.	4	1.41361	0.192884	5	500	EPI exp.	5	36874.9	0.565736	8	1	B(exp)	4	Hydrowin	-	0.00082	OECD exp.	5.72791e-07	QSAR avg.
p94-28-0	CCCCC(C(=O)OCCOCCOCCOC(=O)C(CCCC)CC)CC	2,2'-ethylenedioxydiethyl bis(2-ethylhexanoate)	parent_chemical	402.575	organic	neutral	Transient	Transient	0.912871		2	0.57735	Doc (OECD & lit exp.)	2	B(QSAR)	2	B(QSAR)	0.707107	(M2-3)	(P1-2)	(P3-4)	N	N	-	4.36	OECD exp.	5.5781	0.0532983	Avg. QSAR	1	5.5781	0.0532983	5	12.0134	QSAR avg	2	12.0134	2.05887	8	2	B(QSAR)	4	Hydrowin	-	0.000281858	QSAR avg.	8.67505e-08	QSAR avg.
p94-36-0	O=C(c1ccccc1)OOC(=O)c1ccccc1	dibenzoyl peroxide	parent_chemical	242.233	organic	neutral	Transient	Transient	1.52753		2	0.57735	Doc (OECD & lit exp.)	1	H(Hydrowin)	1	H(Hydrowin)	1.41421	(M2-3)	(P1-2)	(P1-2)	N	N	-	3.8	OECD exp.	3.1228	0.695653	Avg. QSAR	3	3.1228	0.695653	5	9.1	EPI exp.	3	78.6119	1.78396	8	4	B(QSAR)	1	Hydrowin	-	0.00768652	QSAR avg.	7.54892e-05	QSAR avg.
p94-58-6	CCCc1ccc2c(c1)OCO2	5-propyl-1,3-benzodioxole	parent_chemical	164.205	organic	neutral	Transient	Transient	0		3	0	Swater (Avg. QSAR)	1	B(QSAR)	1	B(QSAR) V(QSAR avg.)	0	(M2-3)	(P3-4)	(P3-4)	N	N	-	-	-	3.05647	0.31818	Avg. QSAR	3	3.05647	0.31818	5	186.521	QSAR avg	3	186.521	1.51942	8	1	B(QSAR)	-	-	-	5.03659	QSAR avg.	2.24948	QSAR avg.
p94-60-0	COC(=O)C1CCC(CC1)C(=O)OC	dimethyl cyclohexane-1,4-dicarboxylate	parent_chemical	200.236	organic	neutral	Unstable MOC	Unstable MOC	0		4	0	Swater (OECD & lit exp.)	1	B(QSAR)	1	B(QSAR)	0	(M2-3)	(P1-2)	(P1-2)	N	N	-	-	-	1.5998	0.298967	Avg. QSAR	4	1.5998	0.298967	5	8210	OECD exp.	4	5723.19	1.0272	8	1	B(QSAR)	4	Hydrowin	-	6.97085	QSAR avg.	1.93969e-05	QSAR avg.
p94-70-2,h92-74-0,h2786-76-7,h23949-66-8	CCOc1ccccc1N	o-phenetidine	hydrolysis_product,parent_chemical	137.183	organic	ionizable	3	3	0		5	0	Swater (Avg. QSAR)	2	B(QSAR)	2	B(QSAR)	0	(M2-3)	(P3-4)	(P3-4)	B	4.43	Exp (CRC)	-	-	1.0492	0.352403	Avg. QSAR	5	0.822315	0.333856	5	20574	QSAR avg	5	20574	0.950103	8	2	B(QSAR)	-	-	-	7.33843	QSAR avg.	3.81587e-05	QSAR avg.
p94-71-3	CCOOc1ccccc1	2-ethoxyphenol	parent_chemical	138.167	organic	neutral	Unstable MOC	Unstable MOC	0.57735	exp	4	0.57735	Swater (OECD & lit exp.)	1	B(exp)	1	B(exp) V(QSAR avg.)	0	(M2-3)	(P1-2)	(P1-2)	N	N	-	-	-	2.2611	0.150051	Avg. QSAR	3	2.2611	0.150051	5	9310	OECD exp.	4	1471.45	0.84608	8	1	B(exp)	-	-	-	114.662	QSAR avg.	0.0238906	QSAR avg.
p94-91-7	CC(N=Cc1ccccc1O)CN=Cc1ccccc1O	α,α'-propylenedinitrilodi-o-cresol	parent_chemical	282.344	organic	ionizable	Unstable MOC	Unstable MOC	1		4	1	Swater (Avg. QSAR)	1	B(exp)	1	B(exp)	0	(M2-3)	(P3-4)	(P3-4)	amph	amphoprotic	-	-	-	3.5		OECD exp	3	2.6336	1.46033	5	1903.49	QSAR avg	4	1903.49	2.09444	8	1	B(exp)	-	-	-	1.30453e-06	QSAR avg.	1.24488e-07	QSAR avg.
p94-96-2	CCCCC(C(O)O)CC	2-ethylhexane-1,3-diol	parent_chemical	146.231	organic	neutral	Unstable MOC	Unstable MOC	1		5	1	Swater (Avg. QSAR)	1	B(QSAR) H(LHC QSAR)	1	B(QSAR) H(LHC QSAR)	0	(M2-3)	(P1-2)	(P1-2)	N	N	-	-	-	3.09		OECD exp	4	1.8349	0.585719	5	13859.1	QSAR avg	5	13859.1	1.49161	8	1	B(QSAR)	1	LHC QSAR	-	0.453459	QSAR avg.	1.03335e-05	QSAR avg.
p95-02-3	NCc1cnc(nc1N)C	4-amino-2-methylpyrimidine-5-methylamine	parent_chemical	138.173	organic	ionizable	5	5	0.707107		5	0	Swater (Avg. QSAR)	3	B(QSAR)	3	B(QSAR)	0.707107	(M4-5)	(P3-4)	(P3-4)	B	7.87604	QSAR (SPARC)	-	-	-6.14609		OECD exp	5	-3.92648	1.35343	5	3.03669e+09	QSAR avg	5	3.03669e+09	1.15471	8	3	B(QSAR)	-	-	-	0.0187	OECD exp.	2.05952e-10	QSAR avg.
p95-14-7	c1ccc2c(c1)[nH]nn2	benzotriazole	parent_chemical	119.127	organic	ionizable	3	3	2.41523		5	2.3094	Swater (EPI exp.)	2	B(QSAR)	2	B(QSAR)	0.707107	(M4-5)	(P3-4)	(P3-4)	amph	amphoprotic	-	-	-	5.7		OECD exp	5	0.536932	0.757744	5	19800	EPI exp.	5	47360.8	1.48878	8	2	B(QSAR)	-	-	-	0.00165414	QSAR avg.	3.00614e-06	QSAR avg.
p95-16-9	c1ccc2c(c1)scn2	benzothiazole	parent_chemical	135.188	organic	ionizable	2	2	1		4	0.707107	Swater (EPI exp.)	2	B(QSAR)	2	B(QSAR)	0.707107	(M2-3)	(P3-4)	(P3-4)	FALSE	-	-	-	-	2.02		lit exp.	4	2.01463	0.142124	5	4300	EPI exp.	3	985.452	0.678958	8	2	B(QSAR)	-	-	-	18	OECD exp.	6.32413e-05	QSAR avg.
p95-23-8,h52846-56-7,h68134-22-5	Nc1ccc2c(c1)nc([nH]2)O	5-amino-1,3-dihydro-2H-benzimidazol-2-one	hydrolysis_product,parent_chemical	149.153	organic	ionizable	4	4	1.22474		3	1	Swater (OECD & lit exp.)	3	B(QSAR)	3	B(QSAR)	0.707107	(M4-5)	(P3-4)	(P3-4)	amph	amphoprotic	-	-	-	-0.33		OECD exp	5	0.114388	0.415462	5	690	OECD exp.	5	151902	2.46262	8	3	B(QSAR)	-	-	-	2.30453e-06	QSAR avg.	5.64382e-13	QSAR avg.
p95-31-8	CC(NSc1nc2c(s1)cccc2)(C)C	N-tert-butylbenzothiazole-2-sulphenamide	parent_chemical	238.375	organic	neutral	4	4	0.912871		2	0.57735	Swater (EPI exp.)	4	B(QSAR)	4	B(QSAR) V(QSAR avg.)	0.707107	(M2-3)	(P3-4)	(P3-4)	N	N	-	-	-	3.36		OECD exp	3	2.92213	0.573477	5	0.3	EPI exp.	3	598.76	1.97018	8	4	B(QSAR)	-	-	-	0.00021	OECD exp.	5.43536e-07	QSAR avg.
p95-33-0	C1CCC(CC1)NSc1nc2c(s1)cccc2	N-cyclohexylbenzothiazole-2-sulfenamide	parent_chemical	264.413	organic	neutral	4	4	1.73205		3	1	Swater (Avg. QSAR)	4	B(QSAR)	4	B(QSAR) V(QSAR avg.)	1.41421	(M2-3)	(P3-4)	(P3-4)	N	N	-	-	-	5		OECD exp	2	3.58775	0.635825	5	144.268	QSAR avg	3	144.268	2.08261	8	4	B(QSAR)	-	-	-	4.53e-05	OECD exp.	4.99061e-08	QSAR avg.
p95-38-5	CCCCCCCCC=CCCCCCCCC1=NCCN1CCO	2-(2-heptadec-8-enyl-2-imidazolin-1-yl)ethanol	parent_chemical	350.592	organic	ionizable	Unstable MOC	Unstable MOC	1.1547		5	1.1547	Doc (OECD & lit exp.)	1	B(QSAR)	1	B(QSAR)	0	(M2-3)	(P3-4)	(P3-4)	B	12.4246	QSAR (SPARC)	-3.32464	OECD exp.	5.63166	1.94746	Avg. QSAR	3	2.2618	3.17186	5	6.60579e+08	QSAR avg	5	6.60579e+08	2.64165	8	1	B(QSAR)	-	-	-	1	OECD exp.	1.20082e-07	QSAR avg.
p95-47-6,s1330-20-7	Cc1ccccc1C	o-xylene:xylene	parent_chemical,salt_or_mixture_component	106.168	organic	neutral	Transient	Transient	0	exp	3	0	Doc (OECD & lit exp.)	1	B(exp)	1	B(exp) V(Lit exp.)	0	(M4-5)	(P1-2)	(P1-2)	N	N	-	2.73	OECD exp.	3.12	0	lit exp.	3	2.98073	0.106856	5	170.5	OECD exp.	3	242.294	0.677049	8	1	B(exp)	-	-	-	880	Lit. Exp.	0.218776	Lit exp.
p95-48-7,s1319-77-3,h27157-94-4	Cc1ccccc1O	o-cresol:cresol	hydrolysis_product,parent_chemical,salt_or_mixture_component	108.141	organic	ionizable	Unstable MOC	Unstable MOC	0.57735		4	0.57735	Doc (OECD & lit exp.)	1	B(QSAR)	1	B(QSAR) PT(exp.)	0	(M4-5)	(P1-2)	(P1-2)	A	10.29	Exp (CRC)	1.5452	OECD exp.	1.7852	0.0212132	lit exp.	4	1.79743	0.219945	5	25900	EPI exp.	5	17773.1	0.748342	8	1	B(QSAR)	-	-	1	36.7	OECD exp.	5.44888e-05	OECD exp.
p95-49-8,h88-66-4,h611-19-8	Cc1ccccc1Cl	2-chlorotoluene	hydrolysis_product,parent_chemical	126.586	organic	neutral	1	Transient	0		3	0	Doc (OECD & lit exp.)	2	B(QSAR)	1	V(Lit exp.)	0	(M2-3)	(P3-4)	(P3-4)	N	N	-	2.5	OECD exp.	3.42	0	lit exp.	3	3.08607	0.094982	5	374	EPI exp.	3	205.357	0.783953	8	2	B(QSAR)	-	-	-	470	OECD exp.	0.144544	Lit exp.
p95-50-1	Clc1ccccc1Cl	1,2-dichlorobenzene	parent_chemical	147.004	organic	neutral	4	Transient	0.912871		3	0.57735	Doc (OECD & lit exp.)	4	B(QSAR)	1	V(Lit exp.)	0.707107	(M2-3)	(P3-4)	(P3-4)	N	N	-	2.65	OECD exp.	3.3925	0.075	lit exp.	2	3.23618	0.130333	5	80	EPI exp.	3	119.791	0.555081	8	4	B(QSAR)	-	-	-	200.993	OECD exp.	0.1	Lit exp.
p95-51-2,h93-70-9,h3320-83-0,h6486-23-3	Nc1ccccc1Cl	2-chloroaniline	hydrolysis_product,parent_chemical	127.574	organic	ionizable	4.5	2	0.707107		4	0	Doc (PP-LFER)	4	B(QSAR)	2	V(OECD exp.)	0.707107	(M2-3)	(P3-4)	(P3-4)	B	2.655	Exp (OECD (average))	1.60957	PP-LFER	1.89081	0	lit exp.	4	1.71678	0.0182504	5	5853.04	OECD exp.	4	3437.42	0.625319	8	4	B(QSAR)	-	-	-	27.1	OECD exp.	0.000249183	OECD exp.
p95-52-3	Cc1ccccc1F	2-fluorotoluene	parent_chemical	110.132	organic	neutral	4	Transient	0.707107		3	0	Swater (Avg. QSAR)	4	B(QSAR)	1	V(QSAR avg.)	0.707107	(M4-5)	(P1-2)	(P1-2)	N	N	-	-	-	2.65952	0.0998401	Avg. QSAR	3	2.65952	0.0998401	5	593.841	QSAR avg	3	593.841	0.713449	8	4	B(QSAR)	-	-	-	3065.9	EPIwin Exp.	0.389596	QSAR avg.
p95-53-4,h93-68-5,h93-69-6,h97-39-2,h135-61-5,h5468-75-7,h6410-32-8,h6471-50-7,h6535-46-2	Cc1ccccc1N	o-toluidine	hydrolysis_product,parent_chemical	107.156	organic	ionizable	Unstable MOC	Unstable MOC	0		5	0	Doc (PP-LFER)	1	B(exp)	1	B(exp)	0	(M4-5)	(P3-4)	(P3-4)	B	4.45	Exp (CRC)	0.484001	PP-LFER	0.738121	0	lit exp.	5	1.077	0.287929	5	16600	EPI exp.	5	24889.8	0.591909	8	1	B(exp)	-	-	-	122	OECD exp.	8.70964e-05	Lit exp.
p95-54-5,h103312-62-5,h103577-40-8,h152402-98-7	Nc1ccccc1N	o-phenylenediamine	hydrolysis_product,parent_chemical	108.144	organic	ionizable	5	Unstable MOC	0.707107		5	0	Swater (OECD & lit exp.)	4	B(QSAR)	1	PT(exp.)	0.707107	(M4-5)	(P3-4)	(P3-4)	B	4.57	Exp (CRC)	-	-	-0.553514		OECD exp	5	-0.680764	0.446802	5	191915	OECD exp.	5	932165	2.05284	8	4	B(QSAR)	-	-	1	0.274598	EPIwin Exp.	2.94441e-07	EPI exp.
p95-55-6	Nc1ccccc1O	2-aminophenol	parent_chemical	109.128	organic	ionizable	3	3	0		5	0	Swater (EPI exp.)	2	B(QSAR)	2	B(QSAR)	0	(M4-5)	(P1-2)	(P1-2)	amph	amphoprotic	-	-	-	0.62		lit exp.	5	0.236617	0.229782	5	20000	EPI exp.	5	59208.1	0.685036	8	2	B(QSAR)	-	-	-	0.257355	QSAR avg.	3.67224e-08	QSAR avg.
p95-57-8	Oc1ccccc1Cl	2-chlorophenol	parent_chemical	128.559	organic	ionizable	3	Unstable MOC	0		5	0	Doc (PP-LFER)	2	B(QSAR)	1	V(Lit exp.)	0	(M2-3)	(P3-4)	(P3-4)	A	8.56	Exp (CRC)	-0.133969	PP-LFER	0.694511	0	lit exp.	5	0.719217	0.52482	5	28500	EPI exp.	5	223430	0.861908	8	2	B(QSAR)	-	-	-	308	Lit. Exp.	0.000457088	Lit exp.
p95-63-6	Cc1ccc(c(c1)C)C	1,2,4-trimethylbenzene	parent_chemical	120.196	organic	neutral	Transient	Transient	0.912871		2	0.57735	Doc (OECD & lit exp.)	2	B(QSAR)	1	V(Lit exp.)	0.707107	(M4-5)	(P1-2)	(P3-4)	N	N	-	3.04	OECD exp.	3.56		lit exp.	2	3.51464	0.139675	5	57	EPI exp.	3	76.4729	0.72695	8	2	B(QSAR)	-	-	-	300	OECD exp.	0.234423	Lit exp.
p95-64-7	Nc1ccc(c(c1)C)C	3,4-xylidine	parent_chemical	121.183	organic	ionizable	4.5	4.5	0.707107		4	0	Swater (EPI exp.)	3	B(QSAR)	3	B(QSAR)	0.707107	(M4-5)	(P3-4)	(P3-4)	B	5.17	Exp (OECD)	-	-	1.49792	0.547606	Avg. QSAR	5	1.01856	0.1438	5	3800	EPI exp.	5	24634.4	0.497343	8	3	B(QSAR)	-	-	-	3.7107	OECD exp.	7.6064e-05	EPI exp.
p95-68-1,h97-36-9,h5102-83-0,h22094-93-5	Cc1ccc(c(c1)C)N	2,4-xylidine	hydrolysis_product,parent_chemical	121.183	organic	ionizable	5	5	0.912871		5	0.57735	Swater (OECD & lit exp.)	3	B(QSAR)	3	B(QSAR)	0.707107	(M4-5)	(P3-4)	(P3-4)	B	5.0093	QSAR (SPARC)	-	-	0.970141		OECD exp	5	1.19683	0.200814	5	62812.6	OECD exp.	5	19431.9	0.61677	8	3	B(QSAR)	-	-	-	2.9	OECD exp.	2.53295e-05	OECD exp.
p95-71-6,h132900-75-5,h174063-87-7	Oc1ccc(c(c1)C)O	2-methylhydroquinone	hydrolysis_product,parent_chemical	124.14	organic	ionizable	Unstable MOC	Unstable MOC	0		5	0	Swater (Avg. QSAR)	1	B(QSAR)	1	B(QSAR)	0	(M4-5)	(P1-2)	(P1-2)	A	10.0558	QSAR (SPARC)	-	-	1.31264	0.370587	Avg. QSAR	5	1.20303	0.401582	5	117135	QSAR avg	5	117135	1.18526	8	1	B(QSAR)	-	-	-	0.0157296	QSAR avg.	2.83871e-09	QSAR avg.
p95-73-8,s29797-40-8	Clc1ccc(c(c1)Cl)C	2,4-dichlorotoluene:dichloromethylbenzene	parent_chemical,salt_or_mixture_component	161.032	organic	neutral	4	Transient	0.707107		2	0	Swater (Avg. QSAR)	4	B(QSAR)	1	V(QSAR avg.)	0.707107	(M2-3)	(P3-4)	(P3-4)	N	N	-	-	-	3.74806	0.141468	Avg. QSAR	2	3.74806	0.141468	5	43.6016	QSAR avg	2	43.6016	0.78733	8	4	B(QSAR)	-	-	-	61.0514	EPIwin Exp.	0.12652	QSAR avg.
p95-74-9,h28479-22-3	Nc1ccc(c(c1)Cl)C	3-chloro-p-toluidine	hydrolysis_product,parent_chemical	141.601	organic	ionizable	5	5	0.707107		5	0	Swater (EPI exp.)	4	B(QSAR)	4	B(QSAR) V(QSAR avg.)	0.707107	(M2-3)	(P3-4)	(P3-4)	B	3.97732	QSAR (SPARC)	-	-	2.15554	0.192936	Avg. QSAR	4	2.03961	0.113711	5	92000	EPI exp.	4	1909.84	0.433009	8	4	B(QSAR)	-	-	-	3.85824	QSAR avg.	7.27373e-05	QSAR avg.
p95-75-0,s29797-40-8	Cc1ccc(c(c1)Cl)Cl	3,4-dichlorotoluene:dichloromethylbenzene	parent_chemical,salt_or_mixture_component	161.032	organic	neutral	4	Transient	0.707107		2	0	Swater (EPI exp.)	4	B(QSAR)	1	V(EPI exp.)	0.707107	(M2-3)	(P3-4)	(P3-4)	N	N	-	-	-	3.76813	0.147526	Avg. QSAR	2	3.76813	0.147526	5	26	EPI exp.	2	38.0544	0.581801	8	4	B(QSAR)	-	-	-	41.9895	EPIwin Exp.	0.105099	EPI exp.
p95-76-1,h101-20-2,h102-36-3,h330-54-1	Nc1ccc(c(c1)Cl)Cl	3,4-dichloroaniline	hydrolysis_product,parent_chemical	162.019	organic	ionizable	4	Transient	0		3	0	Doc (OECD & lit exp.)	4	B(QSAR)	1	V(EPI exp.)	0	(M2-3)	(P3-4)	(P3-4)	B	2.72768	QSAR (SPARC)	2.2674	OECD exp.	2.48641	0.178896	Avg. QSAR	3	2.47737	0.17582	5	92	EPI exp.	3	586.022	0.691054	8	4	B(QSAR)	-	-	-	0.294	OECD exp.	0.000597061	EPI exp.
p95-78-3	Cc1ccc(c(c1)N)C	2,5-xylidine	parent_chemical	121.183	organic	ionizable	4.5	2	0.912871		4	0.57735	Swater (EPI exp.)	3	B(QSAR)	2	V(EPI exp.)	0.707107	(M2-3)	(P3-4)	(P3-4)	B	4.53	Exp (OECD)	-	-	-0.30031		OECD exp	4	1.41834	0.0871571	5	5600	EPI exp.	4	8758.06	0.456782	8	3	B(QSAR)	-	-	-	19.995	EPIwin Exp.	0.00017462	EPI exp.
p95-79-4,h135-63-7,h5280-80-8,h5580-58-5,h68227-78-1	Clc1ccc(c(c1)N)C	5-chloro-o-toluidine	hydrolysis_product,parent_chemical	141.601	organic	ionizable	4.5	4.5	0.707107		4	0	Swater (Avg. QSAR)	4	B(QSAR)	3	V(QSAR avg.)	0.707107	(M2-3)	(P3-4)	(P3-4)	B	3.41923	QSAR (SPARC)	-	-	2.24038	0.0615854	Avg. QSAR	4	2.19988	0.0402358	5	1350.65	QSAR avg	4	1350.65	0.460024	8	4	B(QSAR)	-	-	-	5.87512	QSAR avg.	9.41272e-05	QSAR avg.
p95-80-7,h584-84-9,h17526-94-2,h26471-62-5	Nc1ccc(c(c1)N)C	4-methyl-m-phenylenediamine	hydrolysis_product,parent_chemical	122.171	organic	ionizable	5	Unstable MOC	0.707107		5	0	Swater (Avg. QSAR)	4	B(QSAR)	1	PT(exp.)	0.707107	(M2-3)	(P3-4)	(P3-4)	B	polyprotic	-	-	-	-0.385955	0.347521	Avg. QSAR	5	-0.385955	0.347521	5	90120.4	QSAR avg	5	90120.4	1.00984	8	4	B(QSAR)	-	-	1	0.190619	EPIwin Exp.	2.49449e-08	QSAR avg.
p95-82-9,h59673-82-4,h61847-48-1,h83929-47-9	Clc1ccc(c(c1)N)Cl	2,5-dichloroaniline	hydrolysis_product,parent_chemical	162.019	organic	ionizable	5	5	0		5	0	Doc (OECD & lit exp.)	4	B(QSAR)	4	B(QSAR) V(QSAR avg.)	0	(M2-3)	(P3-4)	(P3-4)	B	9.48	Exp (OECD (average))	-3.03	OECD exp.	2.46958	0.130099	Avg. QSAR	5	0.277576	2.9937	5	1.2716e+08	QSAR avg	5	1.2716e+08	1.11698	8	4	B(QSAR)	-	-	-	2.49606	QSAR avg.	9.00138e-05	QSAR avg.
p95-85-2	Clc1ccc(c(c1)N)O	2-amino-4-chlorophenol	parent_chemical	143.574	organic	ionizable	5	5	0.707107		5	0	Swater (Avg. QSAR)	4	B(QSAR)	4	B(QSAR) V(QSAR avg.)	0.707107	(M2-3)	(P3-4)	(P3-4)	amph	amphoprotic	-	-	-	1.20246	0.13648	Avg. QSAR	5	1.20246	0.13648	5	11426.5	QSAR avg	5	11426.5	1.0411	8	4	B(QSAR)	-	-	-	0.175661	QSAR avg.	1.08112e-07	QSAR avg.
p95-87-4	Cc1ccc(c(c1)O)C	2,5-xylenol	parent_chemical	122.168	organic	ionizable	2	2	0.912871		4	0.57735	Doc (PP-LFER)	2	B(QSAR)	2	B(QSAR)	0.707107	(M4-5)	(P1-2)	(P1-2)	A	10.4647	QSAR (SPARC)	1.50148	PP-LFER	2.20192	0	lit exp.	3	2.37794	0.183058	5	3540	EPI exp.	4	4500.34	0.599626	8	2	B(QSAR)	-	-	-	20.7948	EPIwin Exp.	4.57088e-05	Lit exp.
p95-92-1	CCOC(=O)C(=O)OCC	diethyl oxalate	parent_chemical	146.144	organic	neutral	Unstable MOC	Unstable MOC	0		5	0	Swater (EPI exp.)	1	B(QSAR)	1	B(QSAR)	0	(M4-5)	(P1-2)	(P1-2)	N	N	-	-	-	0.781912	0.288146	Avg. QSAR	5	0.781912	0.288146	5	36000	EPI exp.	5	31379.5	0.594469	8	1	B(QSAR)	4	LHC QSAR	-	55.2	OECD exp.	9.03771e-05	EPI exp.
p95-96-5	CC1OC(=O)C(OC1=O)C	dilactide	parent_chemical	144.128	organic	neutral	Unstable MOC	Unstable MOC	0.57735		4	0.57735	Doc (OECD & lit exp.)	1	B(QSAR)	1	B(QSAR)	0	(M4-5)	(P1-2)	(P1-2)	N	N	-	1.32	OECD exp.	0.148303	1.12449	Avg. QSAR	5	0.148303	1.12449	5	249978	QSAR avg	5	249978	2.3118	8	1	B(QSAR)	-	-	-	0.0529216	QSAR avg.	0.00024946	QSAR avg.
p96-05-9	C=CCOC(=O)C(=C)C	allyl methacrylate	parent_chemical	126.156	organic	neutral	Transient	Transient	0.57735	exp	3	0.57735	Doc (OECD & lit exp.)	1	B(exp)	1	B(exp) V(QSAR avg.)	0	(M2-3)	(P1-2)	(P1-2)	N	N	-	2.03	OECD exp.	1.9381	0.158075	Avg. QSAR	4	1.9381	0.158075	5	5248.67	QSAR avg	4	5248.67	0.864033	8	1	B(exp)	4	OECD exp.	-	769.767	OECD exp.	0.0118251	QSAR avg.
p96-09-3	O1CC1c1ccccc1	(epoxyethyl)benzene	parent_chemical	120.152	organic	neutral	Unstable MOC	Unstable MOC	0	exp	4	0	Doc (OECD & lit exp.)	1	B(exp)	1	B(exp) V(EPI exp.)	0	(M2-3)	(P1-2)	(P3-4)	N	N	-	1.58	OECD exp.	1.62434	0.0973083	Avg. QSAR	4	1.62434	0.0973083	5	1490	OECD exp.	4	3740.54	0.476389	8	1	B(exp)	-	-	-	39.99	EPIwin Exp.	0.000646135	EPI exp.
p96-10-6	CC[Al](CC)Cl	diethylaluminium chloride	parent_chemical	120.559	organo_metallic	neutral	Unstable MOC	Unstable MOC	1.58114		5	1.41421	Swater (Avg. QSAR)	1	H(LHC QSAR)	1	H(LHC QSAR)	0.707107	(M2-3)	(P3-4)	(P1-2)	N	N	-	-	-	2.88729	0.547273	Avg. QSAR	3	2.88729	0.547273	4	2.74027e+09	QSAR avg	5	2.74027e+09	2.44949	6	2	B(QSAR)	1	LHC QSAR	-	47.0549	QSAR avg.	-	-
p96-12-8	ClCC(CBr)Br	1,2-dibromo-3-chloropropane	parent_chemical	236.344	organic	neutral	4.5	Unstable MOC	0.707107		4	0	Swater (EPI exp.)	3	B(QSAR)	1	V(EPI exp.)	0.707107	(M2-3)	(P3-4)	(P3-4)	N	N	-	-	-	2.52928	0.156507	Avg. QSAR	3	2.52928	0.156507	5	1230	EPI exp.	3	553.548	0.743285	8	3	B(QSAR)	4	Hydrowin	-	77.314	EPIwin Exp.	0.00601151	EPI exp.
p96-17-3	CC(C=O)CC	2-methylbutyraldehyde	parent_chemical	86.1346	organic	neutral	Unstable MOC	Unstable MOC	0.707107		5	0.707107	Swater (Avg. QSAR)	1	B(QSAR)	1	B(QSAR) V(QSAR avg.)	0	(M4-5)	(P1-2)	(P1-2)	N	N	-	-	-	1.24635	0.111301	Avg. QSAR	4	1.24635	0.111301	5	20948.1	QSAR avg	5	20948.1	0.635678	8	1	B(QSAR)	-	-	-	4695.81	QSAR avg.	0.00844587	QSAR avg.
p96-18-4	ClCC(CCl)Cl	1,2,3-trichloropropane	parent_chemical	147.432	organic	neutral	4.5	Unstable MOC	0.57735		4	0.57735	Doc (OECD & lit exp.)	3	B(QSAR)	1	V(EPI exp.) PT(exp.)	0	(M2-3)	(P3-4)	(P1-2)	N	N	-	1.92	OECD exp.	2.23848	0.173811	Avg. QSAR	3	2.23848	0.173811	5	1750	EPI exp.	4	1088	0.600851	8	3	B(QSAR)	4	OECD exp.	1	491.877	EPIwin Exp.	0.0140269	EPI exp.
p96-20-8	CCC(CO)N	2-aminobutan-1-ol	parent_chemical	89.1382	organic	ionizable	Unstable MOC	Unstable MOC	0	exp	5	0	Swater (EPI exp.)	1	B(exp)	1	B(exp)	0	(M4-5)	(P1-2)	(P1-2)	B	9.6	Exp (OECD)	-	-	-6.05		OECD exp	5	-3.96047	2.37105	5	1000000	EPI exp.	5	4.26752e+11	1.64389	8	1	B(exp)	-	-	-	58.1	OECD exp.	4.22584e-07	QSAR avg.
p96-22-0	CCC(=O)CC	pentan-3-one	parent_chemical	86.1346	organic	neutral	Unstable MOC	Unstable MOC	0		5	0	Doc (OECD & lit exp.)	1	B(QSAR)	1	B(QSAR) V(OECD exp.)	0	(M4-5)	(P1-2)	(P1-2)	N	N	-	0.87	OECD exp.	0.82		lit exp.	5	1.12446	0.288805	5	50000	OECD exp.	5	24012.5	0.501589	8	1	B(QSAR)	-	-	-	5026	OECD exp.	0.00349465	OECD exp.
p96-23-1,h96-18-4,h13674-87-8,h89281-73-2	ClCC(CCl)O	1,3-dichloropropan-2-ol	hydrolysis_product,parent_chemical	128.987	organic	neutral	3	3	0.707107		5	0	Doc (PP-LFER)	2	B(QSAR) H(LHC QSAR)	2	B(QSAR) H(LHC QSAR)	0.707107	(M4-5)	(P3-4)	(P1-2)	N	N	-	-0.01804	PP-LFER	0.783257	0.162908	Avg. QSAR	5	0.783257	0.162908	5	99000	EPI exp.	5	57643.9	0.851066	8	2	B(QSAR)	2	LHC QSAR	-	106.773	EPIwin Exp.	5.27541e-05	EPI exp.
p96-24-2,p57090-45-6,h96-12-8,h96-18-4,h96-23-1,h106-89-8,h13674-87-8,h63727-39-9,h67843-74-7,h118135-28-7	OCC(CCl)O	3-chloropropane-1,2-diol:1,2-Propanediol, 3-chloro-, (2R)-	hydrolysis_product,parent_chemical	110.541	organic	neutral	Unstable MOC	Unstable MOC	0	exp	5	0	Swater (EPI exp.)	1	B(exp)	1	B(exp)	0	(M4-5)	(P1-2)	(P1-2)	N	N	-	-	-	-0.567071	0.284616	Avg. QSAR	5	-0.567071	0.284616	5	1000000	EPI exp.	5	498517	0.724177	8	1	B(exp)	-	-	-	87	OECD exp.	1.19003e-06	EPI exp.
p96-26-4	OCC(=O)CO	1,3-dihydroxyacetone	parent_chemical	90.0793	organic	neutral	Unstable MOC	Unstable MOC	0		5	0	Swater (Avg. QSAR)	1	B(exp)	1	B(exp) V(QSAR avg.)	0	(M4-5)	(P1-2)	(P1-2)	N	N	-	-	-	-1.32732	0.375409	Avg. QSAR	5	-1.32732	0.375409	5	1.50652e+06	QSAR avg	5	1.50652e+06	1.92719	8	1	B(exp)	-	-	-	0.0058	OECD exp.	0.0164943	QSAR avg.
p96-29-7	C/C(=N\O)/CC	butanone oxime	parent_chemical	87.1222	organic	ionizable	3	3	0.707107		5	0	Doc (OECD & lit exp.)	2	B(QSAR) H(LHC QSAR)	2	B(QSAR) H(LHC QSAR)	0.707107	(M4-5)	(P1-2)	(P1-2)	amph	amphoprotic	-	0.55	OECD exp.	0.614493	0.818611	Avg. QSAR	5	0.614493	0.818611	5	100000	EPI exp.	5	70567.1	1.62394	8	2	B(QSAR)	2	LHC QSAR	-	77.9809	QSAR avg.	1.94242e-05	PP-LFER
p96-31-1	CNC(=O)NC	1,3-dimethylurea	parent_chemical	88.1099	organic	neutral	Unstable MOC	Unstable MOC	0	exp	5	0	Doc (OECD & lit exp.)	1	B(exp)	1	B(exp)	0	(M4-5)	(P1-2)	(P1-2)	N	N	-	0.946	OECD exp.	-0.854336	0.397449	Avg. QSAR	5	-0.854336	0.397449	5	396095	QSAR avg	5	396095	1.06589	8	1	B(exp)	-	-	-	1.70449	QSAR avg.	8.68611e-08	QSAR avg.
p96-32-2	COC(=O)CBr	methyl bromoacetate	parent_chemical	152.981	organic	neutral	Unstable MOC	Unstable MOC	0		5	0	Swater (Avg. QSAR)	1	B(QSAR) H(Hydrowin)	1	B(QSAR) V(QSAR avg.) H(Hydrowin)	0	(M4-5)	(P1-2)	(P1-2)	N	N	-	-	-	0.678757	0.0512713	Avg. QSAR	5	0.678757	0.0512713	5	42756.7	QSAR avg	5	42756.7	0.532886	8	1	B(QSAR)	1	Hydrowin	-	1227.24	QSAR avg.	0.00112828	QSAR avg.
p96-33-3	COC(=O)C=C	methyl acrylate	parent_chemical	86.091	organic	neutral	Unstable MOC	Unstable MOC	0.57735		4	0.57735	Doc (OECD & lit exp.)	1	B(QSAR)	1	B(QSAR) V(EPI exp.)	0	(M4-5)	(P1-2)	(P1-2)	N	N	-	1.4	OECD exp.	0.8		lit exp.	5	0.707639	0.164309	5	49400	EPI exp.	5	39943.4	0.574137	8	1	B(QSAR)	4	Hydrowin	-	11543.8	EPIwin Exp.	0.00813803	EPI exp.
p96-34-4	COC(=O)CCl	methyl chloroacetate	parent_chemical	108.525	organic	neutral	Unstable MOC	Unstable MOC	0	exp	5	0	Doc (OECD & lit exp.)	1	B(exp) H(OECD exp.)	1	B(exp) V(OECD exp.) H(OECD exp.)	0	(M4-5)	(P1-2)	(P1-2)	N	N	-	0.808	OECD exp.	0.534355	0.110216	Avg. QSAR	5	0.534355	0.110216	5	46000	EPI exp.	5	45708.2	0.399939	8	1	B(exp)	1	OECD exp.	-	1014.79	OECD exp.	0.000981525	OECD exp.
p96-45-7	S=C1NCCN1	imidazolidine-2-thione	parent_chemical	102.159	organic	ionizable	Unstable MOC	Unstable MOC	0		5	0	Swater (OECD & lit exp.)	1	B(QSAR)	1	B(QSAR)	0	(M4-5)	(P3-4)	(P3-4)	amph	amphoprotic	-	-	-	-0.69467	1.10674	Avg. QSAR	5	-0.69467	1.10674	5	27400	OECD exp.	5	362803	2.18907	8	1	B(QSAR)	4	OECD exp.	-	4.43335	OECD exp.	1.64677e-05	OECD exp.
p96-47-9	CC1CCCO1	tetrahydro-2-methylfuran	parent_chemical	86.1346	organic	neutral	5	Unstable MOC	1.41421		5	0	Doc (PP-LFER)	3	B(QSAR)	1	V(Lit exp.)	1.41421	(M4-5)	(P1-2)	(P1-2)	N	N	-	0.2178	PP-LFER	1.01969	0.196449	Avg. QSAR	5	1.01969	0.196449	5	139000	EPI exp.	5	32760.7	0.714021	8	3	B(QSAR)	-	-	-	12600	Lit. Exp.	0.00380189	Lit exp.
p96-48-0	O=C1CCCO1	γ-butyrolactone	parent_chemical	86.091	organic	neutral	Unstable MOC	Unstable MOC	0	exp	5	0	Doc (OECD & lit exp.)	1	B(exp)	1	B(exp)	0	(M4-5)	(P1-2)	(P1-2)	N	N	-	0.65	OECD exp.	-0.64		lit exp.	5	-0.158107	0.445473	5	1000000	OECD exp.	5	188293	1.09095	8	1	B(exp)	4	OECD exp.	-	59.925	OECD exp.	2.08228e-06	OECD exp.
p96-49-1	O=C1OCCO1	ethylene carbonate	parent_chemical	88.0634	organic	neutral	Unstable MOC	Unstable MOC	0.707107		5	0	Swater (OECD & lit exp.)	1	H(LHC QSAR)	1	H(LHC QSAR)	0.707107	(M4-5)	(P1-2)	(P1-2)	N	N	-	-	-	0.11		OECD exp	5	-0.353371	0.822257	5	778000	OECD exp.	5	177408	0.942773	8	2	B(QSAR)	1	LHC QSAR	-	1.3034	OECD exp.	5.9548e-08	OECD exp.
p96-67-3	O=N(=O)c1cc(N)c(c(c1)S(=O)(=O)O)O	3-amino-2-hydroxy-5-nitrobenzenesulphonic acid	parent_chemical	234.188	organic	ionizable	5	5	0		5	0	Swater (Avg. QSAR)	4	B(QSAR)	4	B(QSAR) V(QSAR avg.)	0	(M4-5)	(P3-4)	(P3-4)	amph	amphoprotic	-	-	-	-2.2389	0.43449	Avg. QSAR	5	-2.2389	0.43449	4	1.07524e+06	QSAR avg	5	1.07524e+06	1.96918	6	4	B(QSAR)	-	-	-	1.13572e-08	QSAR avg.	1.49265e-17	QSAR avg.
p96-69-5	CC(c1cc(Sc2cc(c(cc2C)O)C(C)(C)C)c(cc1O)C)(C)C	6,6'-di-tert-butyl-4,4'-thiodi-m-cresol	parent_chemical	358.546	organic	ionizable	Immobile POC	Immobile POC	0.57735		1	0.57735	Doc (OECD & lit exp.)	4	B(QSAR)	4	B(QSAR) V(QSAR avg.)	0	(M2-3)	(P3-4)	(P3-4)	A	10.2269	QSAR (SPARC)	5.40776	OECD exp.	7.18339	0.647937	Avg. QSAR	1	7.10249	0.629572	5	0.861907	QSAR avg	2	0.861907	2.0284	8	4	B(QSAR)	-	-	-	1.46005e-08	QSAR avg.	7.14479e-11	QSAR avg.
p96-76-4	Oc1ccc(cc1C(C)(C)C)C(C)(C)C	2,4-di-tert-butylphenol	parent_chemical	206.33	organic	ionizable	3	Transient	0.57735		2	0.57735	Swater (OECD & lit exp.)	3	B(QSAR)	2	V(QSAR avg.)	0	(M2-3)	(P1-2)	(P3-4)	A	11.4432	QSAR (SPARC)	-	-	4.78462		OECD exp	1	4.79644	0.343044	5	34.1893	OECD exp.	2	20.6819	0.90621	8	3	B(QSAR)	-	-	-	0.635841	EPIwin Exp.	0.000222578	QSAR avg.
p96-93-5	O=N(=O)c1cc(cc(c1O)N)S(=O)(=O)O	3-amino-4-hydroxy-5-nitrobenzenesulphonic acid	parent_chemical	234.188	organic	ionizable	5	5	0		5	0	Swater (Avg. QSAR)	4	B(QSAR)	4	B(QSAR) V(QSAR avg.)	0	(M4-5)	(P3-4)	(P3-4)	amph	amphoprotic	-	-	-	-2.75996	1.12315	Avg. QSAR	5	-2.75996	1.12315	4	1.07394e+06	QSAR avg	5	1.07394e+06	1.97224	6	4	B(QSAR)	-	-	-	1.13572e-08	QSAR avg.	4.70288e-14	QSAR avg.
p96-96-8	COc1ccc(c(c1)N(=O)=O)N	2-nitro-p-anisidine	parent_chemical	168.153	organic	neutral	4.5	4.5	0.707107		4	0	Doc (OECD & lit exp.)	4	B(QSAR)	4	B(QSAR) V(QSAR avg.)	0.707107	(M2-3)	(P3-4)	(P3-4)	N	N	-	1.893	OECD exp.	1.36147	0.699589	Avg. QSAR	4	1.36147	0.699589	5	120	EPI exp.	4	2795.52	0.856541	8	4	B(QSAR)	-	-	-	0.0111956	QSAR avg.	3.35211e-07	QSAR avg.
p96-97-9,h2516-96-3,h174489-76-0	OC(=O)c1cc(ccc1O)N(=O)=O	5-nitrosalicylic acid	hydrolysis_product,parent_chemical	183.121	organic	ionizable	2	2	0		4	0	Swater (EPI exp.)	2	B(QSAR)	2	B(QSAR)	0	(M4-5)	(P1-2)	(P1-2)	A	2.49826	Exp (OECD (av of log))	-	-	0.248482	2.17849	Avg. QSAR	5	-2.75222	2.0491	5	2000	EPI exp.	5	5.86654e+10	1.18918	8	2	B(QSAR)	-	-	-	3.49009e-05	QSAR avg.	4.44933e-09	QSAR avg.
p96-98-0	OC(=O)c1ccc(c(c1)N(=O)=O)C	3-nitro-p-toluic acid	parent_chemical	181.149	organic	ionizable	3	3	0		5	0	Swater (Avg. QSAR)	2	B(QSAR)	2	B(QSAR)	0	(M2-3)	(P3-4)	(P3-4)	A	3.36869	QSAR (SPARC)	-	-	0.433614	1.74714	Avg. QSAR	5	-2.21891	2.13854	5	1.60979e+09	QSAR avg	5	1.60979e+09	0.911943	8	2	B(QSAR)	-	-	-	0.00283061	QSAR avg.	3.20078e-08	QSAR avg.
p96-99-1	OC(=O)c1ccc(c(c1)N(=O)=O)Cl	4-chloro-3-nitrobenzoic acid	parent_chemical	201.567	organic	ionizable	5	5	0		5	0	Swater (Avg. QSAR)	3	B(QSAR)	3	B(QSAR)	0	(M2-3)	(P3-4)	(P3-4)	A	2.9385	QSAR (SPARC)	-	-	0.747853	1.69466	Avg. QSAR	5	-2.07675	2.41036	5	2.54561e+09	QSAR avg	5	2.54561e+09	0.898031	8	3	B(QSAR)	4	LHC QSAR	-	0.00100114	QSAR avg.	5.68543e-08	QSAR avg.
p97-00-7	O=N(=O)c1ccc(c(c1)N(=O)=O)Cl	1-chloro-2,4-dinitrobenzene	parent_chemical	202.555	organic	neutral	Transient	Transient	0		2	0	Swater (EPI exp.)	1	H(LHC QSAR)	1	H(LHC QSAR)	0	(M2-3)	(P3-4)	(P3-4)	N	N	-	-	-	2.24		OECD exp	3	2.30843	0.116336	5	8	EPI exp.	3	270.381	1.09675	8	4	B(QSAR)	1	LHC QSAR	-	2.57e-06	OECD exp.	0.000115323	EPI exp.
p97-36-9	O=C(Nc1ccc(cc1C)C)CC(=O)C	2',4'-dimethylacetoacetanilide	parent_chemical	205.258	organic	ionizable	2	2	0.707107		4	0	Swater (OECD & lit exp.)	2	B(QSAR)	2	B(QSAR)	0.707107	(M4-5)	(P3-4)	(P3-4)	amph	amphoprotic	-	-	-	1.4		OECD exp	4	1.81766	0.591901	5	2100	OECD exp.	4	1341.23	0.844492	8	2	B(QSAR)	-	-	-	9.3e-05	OECD exp.	3.66892e-09	OECD exp.
p97-39-2	N=C(Nc1ccccc1C)Nc1ccccc1C	1,3-di-o-tolylguanidine	parent_chemical	239.322	organic	ionizable	5	5	1.1547	exp	5	1.1547	Swater (OECD & lit exp.)	4	B(QSAR) H(OECD exp.)	4	B(QSAR) V(QSAR avg.) H(OECD exp.)	0	(M2-3)	(P3-4)	(P3-4)	B	9.93257	QSAR (SPARC)	-	-	2.80717	1.72044	Avg. QSAR	5	0.434137	2.29316	5	5.99333e+07	OECD exp.	5	1.5501e+07	1.51737	8	4	B(QSAR)	4	OECD exp.	-	3.86091e-05	QSAR avg.	7.82826e-08	QSAR avg.
p97-52-9	CONc1ccc(cc1)N(=O)=O	4-nitro-o-anisidine	parent_chemical	168.153	organic	ionizable	4	4	0.866025		3	0.5	Swater (OECD & lit exp.)	4	B(QSAR)	4	B(QSAR) V(QSAR avg.)	0.707107	(M4-5)	(P3-4)	(P3-4)	B	4.33408	QSAR (avg.)	-	-	1.22057		OECD exp	4	1.60805	0.220402	5	331.605	OECD exp.	4	5697.11	1.15578	8	4	B(QSAR)	-	-	-	0.197949	QSAR avg.	4.48733e-07	QSAR avg.
p97-53-0	C=CCc1ccc(c(c1)OC)O	eugenol	parent_chemical	164.205	organic	ionizable	2	2	0.866025		4	0.5	Swater (OECD & lit exp.)	2	B(QSAR)	2	B(QSAR) V(OECD exp.)	0.707107	(M2-3)	(P3-4)	(P3-4)	A	9.99344	QSAR (SPARC)	-	-	1.52568		OECD exp	3	2.37403	0.355762	5	2325.56	OECD exp.	4	1439.23	0.412451	8	2	B(QSAR)	-	-	-	3.99967	OECD exp.	0.00022971	OECD exp.
p97-59-6	NC(=O)NC1NC(=O)NC1=O	allantoin	parent_chemical	158.117	organic	ionizable	Unstable MOC	Unstable MOC	0.912871		4	0.57735	Swater (EPI exp.)	1	H(LHC QSAR)	1	H(LHC QSAR)	0.707107	(M4-5)	(P1-2)	(P1-2)	FALSE	8.96	Exp (OECD)	-	-	-2.98023	1.22932	Avg. QSAR	5	-2.49739	1.3526	3	5260	EPI exp.	5	4.22286e+06	1.37957	2	3	B(QSAR)	1	LHC QSAR	-	8.66877e-08	QSAR avg.	2.33264e-16	QSAR avg.
p97-61-0,h39255-32-8	CC(C(=O)O)CCC	2-methylvaleric acid	hydrolysis_product,parent_chemical	116.161	organic	ionizable	Unstable MOC	Unstable MOC	0	exp	5	0	Swater (EPI exp.)	1	B(exp)	1	B(exp)	0	(M4-5)	(P1-2)	(P1-2)	A	4.9	Exp (OECD)	-	-	-3.3		lit exp.	5	-1.85723	1.556	5	15000	EPI exp.	5	9.21847e+08	0.91316	8	1	B(exp)	-	-	-	37.5344	QSAR avg.	6.27684e-05	QSAR avg.
p97-63-2	CCOC(=O)C(=C)C	ethyl methacrylate	parent_chemical	114.145	organic	neutral	Unstable MOC	Unstable MOC	0.57735	exp	4	0.57735	Swater (OECD & lit exp.)	1	B(exp)	1	B(exp) V(EPI exp.)	0	(M4-5)	(P1-2)	(P1-2)	N	N	-	-	-	1.94		lit exp.	4	1.62851	0.12896	5	4690	OECD exp.	5	11966.5	0.962508	8	1	B(exp)	4	OECD exp.	-	2745.98	EPIwin Exp.	0.0234326	EPI exp.
p97-65-4	OC(=O)CC(=C)C(=O)O	itaconic acid	parent_chemical	130.101	organic	neutral	Unstable MOC	Unstable MOC	0	exp	5	0	Swater (EPI exp.)	1	B(exp)	1	B(exp)	0	(M4-5)	(P1-2)	(P1-2)	N	N	-	-	-	-2.90805	2.57443	Avg. QSAR	5	-2.90805	2.57443	5	76800	EPI exp.	5	3.94298e+06	2.4916	8	1	B(exp)	-	-	-	0.00598309	QSAR avg.	1.20186e-10	QSAR avg.
p97-72-3	CC(C(=O)OC(=O)C(C)C)C	isobutyric anhydride	parent_chemical	158.199	organic	neutral	Unstable MOC	Unstable MOC	1.41421		4	0	Swater (Avg. QSAR)	1	H(Hydrowin)	1	V(QSAR avg.) H(Hydrowin)	1.41421	(M2-3)	(P1-2)	(P1-2)	N	N	-	-	-	1.59036	0.48512	Avg. QSAR	4	1.59036	0.48512	5	6493.28	QSAR avg	4	6493.28	0.981072	8	4	B(QSAR)	1	Hydrowin	-	71.7032	QSAR avg.	0.00234991	QSAR avg.
p97-74-5	CN(C(=S)SC(=S)N(C)C)C	tetramethylthiuram monosulphide	parent_chemical	208.368	organic	neutral	4	Transient	1.73205		3	1	Swater (OECD & lit exp.)	4	B(QSAR)	1	V(QSAR avg.)	1.41421	(M2-3)	(P3-4)	(P3-4)	N	N	-	-	-	1.93865	1.06964	Avg. QSAR	4	1.93865	1.06964	5	308	OECD exp.	5	160188	2.32143	8	4	B(QSAR)	-	-	-	0.0193493	QSAR avg.	0.000355787	QSAR avg.
p97-77-8	CCN(C(=S)SSC(=S)N(CC)CC)CC	disulfiram	parent_chemical	296.54	organic	neutral	4	Transient	1.65831	exp	2	1.5	Doc (OECD & lit exp.)	4	B(QSAR) H(OECD exp.)	1	V(QSAR avg.)	0.707107	(M2-3)	(P3-4)	(P3-4)	N	N	-	4.1	OECD exp.	3.6		OECD exp	2	3.96568	1.00157	5	4.09	EPI exp.	5	17745.4	2.64158	8	4	B(QSAR)	4	OECD exp.	-	0.000441153	QSAR avg.	0.00170122	QSAR avg.
p97-78-9	CCCCCCCCCCCC(=O)N(CC(=O)O)C	N-lauroylsarcosine	parent_chemical	271.403	organic	ionizable	Unstable MOC	Unstable MOC	1.1547		5	1.1547	Swater (OECD & lit exp.)	1	B(QSAR)	1	B(QSAR)	0	(M2-3)	(P3-4)	(P3-4)	A	3.94595	QSAR (SPARC)	-	-	2.20154	1.69579	Avg. QSAR	5	-0.220075	2.02642	5	5.66263e+08	OECD exp.	5	1.07646e+08	1.73739	8	1	B(QSAR)	-	-	-	2.62438e-05	QSAR avg.	3.28237e-09	QSAR avg.
p97-86-9	CC(COC(=O)C(=C)C)C	isobutyl methacrylate	parent_chemical	142.199	organic	neutral	Unstable MOC	Unstable MOC	0.707107	exp	4	0.707107	Swater (EPI exp.)	1	B(exp)	1	B(exp) V(OECD exp.)	0	(M2-3)	(P1-2)	(P1-2)	N	N	-	-	-	2.66		lit exp.	3	2.50851	0.123182	5	1300	EPI exp.	4	2200.73	0.926645	8	1	B(exp)	4	OECD exp.	-	483.879	EPIwin Exp.	0.038852	OECD exp.
p97-88-1	CCCCOC(=O)C(=C)C	butyl methacrylate	parent_chemical	142.199	organic	neutral	Transient	Transient	0.707107	exp	3	0.707107	Swater (EPI exp.)	1	B(exp)	1	B(exp) V(EPI exp.)	0	(M2-3)	(P1-2)	(P1-2)	N	N	-	-	-	2.88		lit exp.	3	2.65409	0.110864	5	800	EPI exp.	4	1783.2	1.19123	8	1	B(exp)	2	OECD exp.	-	282.596	EPIwin Exp.	0.0202837	EPI exp.
p97-90-5	O=C(C(=C)C)OCCOC(=O)C(=C)C	ethylene dimethacrylate	parent_chemical	198.22	organic	neutral	Unstable MOC	Unstable MOC	0		4	0	Swater (Avg. QSAR)	1	B(exp)	1	B(exp)	0	(M4-5)	(P1-2)	(P1-2)	N	N	-	-	-	2.12721	0.315996	Avg. QSAR	4	2.12721	0.315996	5	3908.52	QSAR avg	4	3908.52	1.31758	8	1	B(exp)	4	OECD exp.	-	5647.27	QSAR avg.	5.40027e-05	QSAR avg.
p97-93-8	CC[Al](CC)CC	triethylaluminium	parent_chemical	114.168	organo_metallic	neutral	Unstable MOC	Unstable MOC	1.58114		4	1.41421	Swater (Avg. QSAR)	1	H(LHC QSAR)	1	H(LHC QSAR)	0.707107	(M2-3)	(P3-4)	(P3-4)	N	N	-	-	-	3.32268	0.790691	Avg. QSAR	2	3.32268	0.790691	4	3145.53	QSAR avg	4	3145.53	2.01203	6	2	B(QSAR)	1	LHC QSAR	-	3.325	OECD exp.	-	-
p97-97-2	ClCC(OC)OC	2-chloro-1,1-dimethoxyethane	parent_chemical	124.568	organic	neutral	3	Unstable MOC	0.707107		5	0	Swater (Avg. QSAR)	2	H(LHC QSAR)	1	V(QSAR avg.)	0.707107	(M4-5)	(P3-4)	(P1-2)	N	N	-	-	-	0.717964	0.231599	Avg. QSAR	5	0.717964	0.231599	5	77106	QSAR avg	5	77106	0.702712	8	4	B(QSAR)	2	LHC QSAR	-	3346.11	QSAR avg.	0.000988222	QSAR avg.
p97-99-4	OCC1CCCO1	tetrahydrofurfuryl alcohol	parent_chemical	102.134	organic	neutral	3	3	0.707107		5	0	Swater (OECD & lit exp.)	2	B(QSAR)	2	B(QSAR)	0.707107	(M4-5)	(P1-2)	(P1-2)	N	N	-	-	-	-0.134437	0.183856	Avg. QSAR	5	-0.134437	0.183856	4	250000	OECD exp.	5	520704	1.14006	8	2	B(QSAR)	4	OECD exp.	-	146.5	OECD exp.	2.41569e-05	OECD exp.
p98-00-0	OCc1ccco1	furfuryl alcohol	parent_chemical	98.1021	organic	neutral	Unstable MOC	Unstable MOC	0	exp	5	0	Swater (EPI exp.)	1	B(exp)	1	B(exp)	0	(M4-5)	(P1-2)	(P1-2)	N	N	-	-	-	0.3		OECD exp	5	0.349457	0.182501	5	1000000	EPI exp.	5	136639	0.784021	8	1	B(exp)	-	-	-	81.1797	EPIwin Exp.	3.21432e-06	EPI exp.
p98-01-1	O=Cc1ccco1	2-furaldehyde	parent_chemical	96.0862	organic	neutral	Unstable MOC	Unstable MOC	0		5	0	Doc (PP-LFER)	1	B(exp)	1	B(exp)	0	(M4-5)	(P1-2)	(P1-2)	N	N	-	0.03292	PP-LFER	0.695121	0.302207	Avg. QSAR	5	0.695121	0.302207	5	74100	EPI exp.	5	36040.9	0.875605	8	1	B(exp)	-	-	-	294.593	EPIwin Exp.	0.000154173	EPI exp.
p98-07-7	ClC(c1ccccc1)(Cl)Cl	α,α,α-trichlorotoluene	parent_chemical	195.477	organic	neutral	Transient	Transient	0	exp	3	0	Swater (EPI exp.)	1	B(exp) H(LHC QSAR)	1	B(exp) V(QSAR avg.) H(LHC QSAR)	0	(M2-3)	(P3-4)	(P3-4)	N	N	-	-	-	3.68478	0.250823	Avg. QSAR	2	3.68478	0.250823	5	53	EPI exp.	2	28.8379	0.431997	8	1	B(exp)	1	LHC QSAR	-	55.1862	EPIwin Exp.	0.0361033	QSAR avg.
p98-09-9	ClS(=O)(=O)c1ccccc1	benzenesulphonyl chloride	parent_chemical	176.622	organic	neutral	Unstable MOC	Unstable MOC	0.57735	exp	4	0.57735	Swater (OECD & lit exp.)	1	B(exp) H(LHC QSAR)	1	B(exp) H(LHC QSAR)	0	(M2-3)	(P3-4)	(P1-2)	N	N	-	-	-	1.90645	0.65104	Avg. QSAR	4	1.90645	0.65104	5	2300	OECD exp.	5	10753.5	1.53569	8	1	B(exp)	1	LHC QSAR	-	7.7314	EPIwin Exp.	0.000187689	QSAR avg.
p98-10-2	NS(=O)(=O)c1ccccc1	benzenesulphonamide	parent_chemical	157.192	organic	ionizable	2	2	0		4	0	Swater (EPI exp.)	2	B(QSAR)	2	B(QSAR)	0	(M4-5)	(P3-4)	(P3-4)	A	9.91213	QSAR (SPARC)	-	-	0.00281912		lit exp.	5	0.218028	0.236722	5	4300	EPI exp.	5	25821.9	1.02464	8	2	B(QSAR)	-	-	-	0.02389	QSAR avg.	8.71037e-06	QSAR avg.
p98-11-3,h98-09-9	OS(=O)(=O)c1ccccc1	benzenesulphonic acid	hydrolysis_product,parent_chemical	158.177	organic	ionizable	5	5	0.707107		5	0	Swater (Avg. QSAR)	3	B(QSAR)	3	B(QSAR)	0.707107	(M4-5)	(P1-2)	(P3-4)	A	2.68	Exp (OECD)	-	-	-1.41167	0.510462	Avg. QSAR	5	-3.24167	3.53226	4	5.92742e+12	QSAR avg	5	5.92742e+12	1.57046	6	3	B(QSAR)	-	-	-	0.00227943	QSAR avg.	1.03054e-07	QSAR avg.
p98-13-5	Cl[Si](c1ccccc1)(Cl)Cl	trichloro(phenyl)silane	parent_chemical	211.551	organo_silane	neutral	4	Transient	1.58114		3	0.707107	Swater (Avg. QSAR)	4	B(QSAR)	1	V(QSAR avg.)	1.41421	(M2-3)	(P1-2)	(P1-2)	N	N	-	-	-	3.80538	0.628042	Avg. QSAR	2	3.80538	0.628042	5	114.913	QSAR avg	3	114.913	1.04027	8	4	B(QSAR)	-	-	-	56.7858	EPIwin Exp.	0.014199	QSAR avg.
p98-16-8	Fc1c(C)cc(c(c1N)F)F	α,α,α-trifluoro-m-toluidine	parent_chemical	161.127	organic	ionizable	4.5	Unstable MOC	0		4	0	Swater (OECD & lit exp.)	4	B(QSAR)	1	V(OECD exp.)	0	(M4-5)	(P1-2)	(P1-2)	B	3.49	Exp (CRC)	-	-	1.97305		OECD exp	4	2.17076	0.166561	5	6126.26	OECD exp.	4	2355.23	1.2004	8	4	B(QSAR)	-	-	-	86.5	OECD exp.	0.00120202	OECD exp.
p98-17-9	Oc1cccc(c1)C(F)(F)F	α,α,α-trifluoro-m-cresol	parent_chemical	162.112	organic	ionizable	5	5	1		5	0.707107	Swater (Avg. QSAR)	4	B(QSAR)	3	V(QSAR avg.)	0.707107	(M2-3)	(P3-4)	(P3-4)	A	8.68	Exp (CRC)	-	-	2.01913	0.346975	Avg. QSAR	4	1.48301	0.431214	5	107341	QSAR avg	5	107341	2.235	8	4	B(QSAR)	-	-	-	69.4406	QSAR avg.	0.000145587	QSAR avg.
p98-29-3	Oc1ccc(cc1O)C(C)(C)C	4-tert-butylpyrocatechol	parent_chemical	166.221	organic	ionizable	3	3	0.83666		5	0.83666	Doc (OECD & lit exp.)	2	B(QSAR)	2	B(QSAR)	0	(M4-5)	(P1-2)	(P1-2)	A	9.33164	QSAR (SPARC)	0.617209	OECD exp.	1.22721		OECD exp	3	2.28866	0.234555	5	23770.6	OECD exp.	5	11958.8	1.33053	8	2	B(QSAR)	4	OECD exp.	-	0.0425279	QSAR avg.	2.48014e-07	QSAR avg.
p98-32-8	Oc1ccc(cc1N)S(=O)(=O)N	3-amino-4-hydroxybenzenesulphonamide	parent_chemical	188.206	organic	ionizable	5	5	1.41421		5	0	Swater (Avg. QSAR)	4	B(QSAR)	4	B(QSAR) V(QSAR avg.)	1.41421	(M4-5)	(P3-4)	(P3-4)	amph	amphoprotic	-	-	-	-0.927537	0.828667	Avg. QSAR	5	-0.927537	0.828667	5	149230	QSAR avg	5	149230	1.06773	8	4	B(QSAR)	-	-	-	2.59253e-05	QSAR avg.	3.23636e-11	QSAR avg.
p98-37-3	Oc1ccc(cc1N)S(=O)(=O)O	3-amino-4-hydroxybenzenesulphonic acid	parent_chemical	189.191	organic	ionizable	4.5	4.5	1.41421		4	0	Swater (EPI exp.)	4	B(QSAR)	4	B(QSAR) V(QSAR avg.)	1.41421	(M4-5)	(P3-4)	(P3-4)	amph	amphoprotic	-	-	-	-2.51764	0.310121	Avg. QSAR	5	-2.51764	0.310121	4	10000	EPI exp.	5	1.1351e+06	1.86756	6	4	B(QSAR)	-	-	-	1.13438e-06	QSAR avg.	3.78275e-15	QSAR avg.
p98-42-0	COc1ccc(cc1N)S(=O)(=O)O	3-amino-4-methoxybenzenesulphonic acid	parent_chemical	203.218	organic	ionizable	5	5	1.41421		5	0	Swater (EPI exp.)	4	B(QSAR)	4	B(QSAR) V(QSAR avg.)	1.41421	(M4-5)	(P3-4)	(P3-4)	amph	amphoprotic	-	-	-	-1.92856	0.232777	Avg. QSAR	5	-1.92856	0.232777	4	25600	EPI exp.	5	568090	1.54896	6	4	B(QSAR)	-	-	-	3.8657e-06	QSAR avg.	2.15106e-12	QSAR avg.
p98-43-1	OC(=O)c1ccc(cc1N)S(=O)(=O)O	4-sulphoanthranilic acid	parent_chemical	217.201	organic	ionizable	5	5	0.707107		5	0	Doc (OECD & lit exp.)	3	B(QSAR)	3	B(QSAR)	0.707107	(M4-5)	(P3-4)	(P3-4)	amph	amphoprotic	-	0.069	OECD exp.	-3.25604	1.55842	Avg. QSAR	5	-3.25604	1.55842	4	10500	EPI exp.	5	502863	1.47764	6	3	B(QSAR)	-	-	-	2.19945e-08	QSAR avg.	7.32014e-16	QSAR avg.
p98-44-2	Nc1cc(ccc1S(=O)(=O)O)S(=O)(=O)O	2-aminobenzene-1,4-disulphonic acid	parent_chemical	253.253	organic	ionizable	5	5	0		5	0	Swater (Avg. QSAR)	4	B(QSAR)	4	B(QSAR) V(QSAR avg.)	0	(M4-5)	(P3-4)	(P3-4)	amph	amphoprotic	-	-	-	-3.89272	1.30339	Avg. QSAR	5	-3.89272	1.30339	4	1.18382e+06	QSAR avg	5	1.18382e+06	1.85406	6	4	B(QSAR)	-	-	-	1.00908e-10	QSAR avg.	1.69713e-17	QSAR avg.
p98-51-1	Cc1ccc(cc1)C(C)(C)C	4-tert-butyltoluene	parent_chemical	148.25	organic	neutral	Transient	Transient	0		2	0	Swater (Avg. QSAR)	2	B(QSAR)	1	V(QSAR avg.)	0	(M2-3)	(P1-2)	(P1-2)	N	N	-	-	-	4.2494	0.371364	Avg. QSAR	2	4.2494	0.371364	5	15.7435	QSAR avg	2	15.7435	0.951877	8	2	B(QSAR)	-	-	-	84.5881	QSAR avg.	0.61858	QSAR avg.
p98-52-2,p21862-63-5,h10411-92-4,h32210-23-4,h42125-46-2	OC1CCC(CC1)C(C)(C)C	4-tert-butylcyclohexanol:trans-4-tert-butylcyclohexanol	hydrolysis_product,parent_chemical	156.27	organic	neutral	1	Transient	0.707107		3	0	Swater (OECD & lit exp.)	2	B(QSAR)	1	V(QSAR avg.)	0.707107	(M2-3)	(P1-2)	(P1-2)	N	N	-	-	-	2.9847	0.355732	Avg. QSAR	3	2.9847	0.355732	5	264	OECD exp.	3	591.326	0.58242	8	2	B(QSAR)	-	-	-	9.331	EPIwin Exp.	0.000613492	QSAR avg.
p98-53-3,h118135-28-7	CC(C1CCC(=O)CC1)(C)C	4-tert-butylcyclohexanone	hydrolysis_product,parent_chemical	154.254	organic	neutral	1	Transient	0		3	0	Swater (OECD & lit exp.)	2	B(QSAR)	1	V(QSAR avg.)	0	(M2-3)	(P1-2)	(P1-2)	N	N	-	-	-	2.72059	0.185158	Avg. QSAR	3	2.72059	0.185158	5	590	OECD exp.	3	553.654	0.693209	8	2	B(QSAR)	-	-	-	20.0392	QSAR avg.	0.00349647	QSAR avg.
p98-54-4	CC(c1ccc(cc1)O)(C)C	4-tert-butylphenol	parent_chemical	150.222	organic	ionizable	2	2	0.447214		4	0.447214	Doc (PP-LFER)	2	B(QSAR)	2	B(QSAR)	0	(M2-3)	(P1-2)	(P1-2)	A	10.23	Exp (CRC)	1.85828	PP-LFER	2.79892		OECD exp	3	3.13545	0.249566	5	969.195	OECD exp.	3	967.97	0.69716	8	2	B(QSAR)	-	-	-	1.2	Lit. Exp.	4.57088e-05	Lit exp.
p98-55-5,p8000-41-7,h80-26-2	CC1=CCC(CC1)C(O)(C)C	p-menth-1-en-8-ol:Terpineol	hydrolysis_product,parent_chemical	154.254	organic	neutral	2	Unstable MOC	0.5		4	0.5	Doc (PP-LFER)	2	B(QSAR)	1	V(EPI exp.)	0	(M2-3)	(P1-2)	(P1-2)	N	N	-	1.53386	PP-LFER	2.6898	0.456172	Avg. QSAR	3	2.6898	0.456172	5	2870	OECD exp.	4	1299.15	0.585238	8	2	B(QSAR)	-	-	-	5.63859	EPIwin Exp.	0.000498914	EPI exp.
p98-56-6	FC(c1ccc(cc1)Cl)(F)F	4-chloro-α,α,α-trifluorotoluene	parent_chemical	180.558	organic	neutral	4	4	0.57735		3	0.57735	Doc (PP-LFER)	4	B(QSAR)	4	B(QSAR) V(OECD exp.)	0	(M2-3)	(P3-4)	(P3-4)	N	N	-	2.672	PP-LFER	3.43535	0.29253	Avg. QSAR	2	3.43535	0.29253	5	33.8	OECD exp.	3	70.9289	1.17912	8	4	B(QSAR)	-	-	-	0.0178	OECD exp.	3.8379e-05	OECD exp.
p98-59-9	Cc1ccc(cc1)S(=O)(=O)Cl	tosyl chloride	parent_chemical	190.649	organic	neutral	Unstable MOC	Unstable MOC	0.707107		4	0.707107	Swater (Avg. QSAR)	1	B(exp) H(LHC QSAR)	1	B(exp) H(LHC QSAR)	0	(M2-3)	(P1-2)	(P1-2)	N	N	-	-	-	2.41584	0.670532	Avg. QSAR	3	2.41584	0.670532	5	3488.39	QSAR avg	4	3488.39	1.54109	8	1	B(exp)	1	LHC QSAR	-	66.65	EPIwin Exp.	0.000205696	QSAR avg.
p98-60-2	Clc1ccc(cc1)S(=O)(=O)Cl	4-chlorobenzenesulphonyl chloride	parent_chemical	211.067	organic	neutral	Unstable MOC	Unstable MOC	1		4	0.707107	Swater (Avg. QSAR)	1	H(LHC QSAR)	1	H(LHC QSAR)	0.707107	(M2-3)	(P3-4)	(P3-4)	N	N	-	-	-	2.59197	0.648418	Avg. QSAR	3	2.59197	0.648418	5	2842.41	QSAR avg	4	2842.41	1.66402	8	4	B(QSAR)	1	LHC QSAR	-	1.48217	QSAR avg.	0.000141706	QSAR avg.
p98-67-9	Oc1ccc(cc1)S(=O)(=O)O	4-hydroxybenzenesulphonic acid	parent_chemical	174.176	organic	ionizable	5	5	0.707107		5	0	Doc (OECD & lit exp.)	3	B(QSAR)	3	B(QSAR)	0.707107	(M4-5)	(P1-2)	(P1-2)	A	2.5	Exp (OECD)	-7.3207	OECD exp.	-2.16703	0.435809	Avg. QSAR	5	-4.04203	3.41574	4	1.07155e+13	QSAR avg	5	1.07155e+13	1.51149	6	3	B(QSAR)	-	-	-	4.44e-09	OECD exp.	1.07144e-11	QSAR avg.
p98-73-7,h26537-19-9,h444065-11-6	OC(=O)c1ccc(cc1)C(C)(C)C	4-tert-butylbenzoic acid	hydrolysis_product,parent_chemical	178.232	organic	ionizable	3	3	0.707107		5	0	Swater (OECD & lit exp.)	2	B(QSAR)	2	B(QSAR)	0.707107	(M2-3)	(P1-2)	(P1-2)	A	4.36	Exp (OECD)	-	-	1.64161	1.99763	Avg. QSAR	5	-0.61439	1.40294	5	5.50011e+09	OECD exp.	5	2.54677e+07	1.11528	8	2	B(QSAR)	-	-	-	0.0113758	QSAR avg.	7.42404e-06	QSAR avg.
p98-82-8	CC(c1ccccc1)C	cumene	parent_chemical	120.196	organic	neutral	1	Transient	0.912871		3	0.57735	Doc (OECD & lit exp.)	2	B(QSAR)	1	V(Lit exp.) PT(exp.)	0.707107	(M2-3)	(P1-2)	(P1-2)	N	N	-	2.946	OECD exp.	3.66	0	lit exp.	2	3.34153	0.215709	5	61.3	EPI exp.	3	125.343	0.868788	8	2	B(QSAR)	-	-	1	250	OECD exp.	0.60256	Lit exp.
p98-83-9	CC(=C)c1ccccc1	2-phenylpropene	parent_chemical	118.18	organic	neutral	1	Transient	0.707107		3	0	Doc (OECD & lit exp.)	2	B(QSAR)	1	V(OECD exp.)	0.707107	(M2-3)	(P1-2)	(P1-2)	N	N	-	2.84	OECD exp.	3.35	0	lit exp.	3	3.15631	0.262307	5	560	OECD exp.	3	197.1	0.952962	8	2	B(QSAR)	-	-	-	250	OECD exp.	0.0212945	OECD exp.
p98-85-1	CCC1(O)CC=CC=C1	1-phenylethanol	parent_chemical	124.184	organic	neutral	2	2	0.57735		4	0.57735	Swater (Avg. QSAR)	2	B(QSAR)	2	B(QSAR) V(QSAR avg.)	0	(M4-5)	(P1-2)	(P1-2)	N	N	-	-	-	0.5		OECD exp	4	1.77978	0.296509	5	5662.48	QSAR avg	4	5662.48	0.453371	8	2	B(QSAR)	-	-	-	20.3404	QSAR avg.	0.000175663	QSAR avg.
p98-86-2	CC(=O)c1ccccc1	acetophenone	parent_chemical	120.152	organic	neutral	Unstable MOC	Unstable MOC	0	exp	4	0	Doc (OECD & lit exp.)	1	B(exp)	1	B(exp) V(OECD exp.)	0	(M2-3)	(P1-2)	(P1-2)	N	N	-	1.51767	OECD exp.	1.58	0	lit exp.	4	1.60848	0.0620061	5	6130	EPI exp.	4	4121.97	0.611498	8	1	B(exp)	-	-	-	45	OECD exp.	0.000608084	OECD exp.
p98-87-3	ClC(c1ccccc1)Cl	α,α-dichlorotoluene	parent_chemical	161.032	organic	neutral	Transient	Transient	0	exp	3	0	Swater (EPI exp.)	1	B(exp) H(LHC QSAR)	1	B(exp) V(EPI exp.) H(LHC QSAR)	0	(M2-3)	(P3-4)	(P1-2)	N	N	-	-	-	3.06539	0.182083	Avg. QSAR	3	3.06539	0.182083	5	250	EPI exp.	3	161.393	0.453019	8	1	B(exp)	1	LHC QSAR	-	60	OECD exp.	0.0162761	EPI exp.
p98-88-4	ClC(=O)c1ccccc1	benzoyl chloride	parent_chemical	140.57	organic	neutral	Unstable MOC	Unstable MOC	0		4	0	Swater (Avg. QSAR)	1	B(exp)	1	B(exp) V(QSAR avg.)	0	(M4-5)	(P1-2)	(P1-2)	N	N	-	-	-	1.94708	0.328961	Avg. QSAR	4	1.94708	0.328961	5	2433.84	QSAR avg	4	2433.84	1.17301	8	1	B(exp)	-	-	-	84	OECD exp.	0.00476026	QSAR avg.
p98-89-5,h766-05-2	OC(=O)C1CCCCC1	cyclohexanecarboxylic acid	hydrolysis_product,parent_chemical	128.172	organic	ionizable	Unstable MOC	Unstable MOC	0.57735		5	0.57735	Swater (OECD & lit exp.)	1	B(QSAR)	1	B(QSAR)	0	(M4-5)	(P1-2)	(P1-2)	A	4.91	Exp (CRC)	-	-	0.283644	1.71112	Avg. QSAR	5	-1.75236	1.54606	5	5.65928e+08	OECD exp.	5	8.01853e+08	1.25337	8	1	B(QSAR)	-	-	-	4.51364	QSAR avg.	1.91218e-05	QSAR avg.
p98-92-0,h100-54-9	NC(=O)c1cccnc1	nicotinamide	hydrolysis_product,parent_chemical	122.127	organic	ionizable	Unstable MOC	Unstable MOC	0	exp	5	0	Swater (EPI exp.)	1	B(exp)	1	B(exp)	0	(M4-5)	(P1-2)	(P1-2)	amph	amphoprotic	-	-	-	-0.625614	0.384789	Avg. QSAR	5	-0.625614	0.384789	5	500000	EPI exp.	5	244861	1.4146	8	1	B(exp)	-	-	-	0.00045	OECD exp.	2.37783e-10	QSAR avg.
p98-94-2	CN(C1CCCCC1)C	cyclohexyldimethylamine	parent_chemical	127.231	organic	ionizable	Unstable MOC	Unstable MOC	0		5	0	Swater (Avg. QSAR)	1	B(exp)	1	B(exp) V(EPI exp.)	0	(M2-3)	(P3-4)	(P3-4)	B	10.0405	QSAR (SPARC)	-	-	0.344515	1.91106	Avg. QSAR	5	-2.07167	1.87804	5	1.07599e+10	QSAR avg	5	1.07599e+10	1.25432	8	1	B(exp)	-	-	-	390.88	QSAR avg.	0.000961024	EPI exp.
p98-95-3	O=N(=O)c1ccccc1	nitrobenzene	parent_chemical	123.112	organic	neutral	4.5	Unstable MOC	0.707107		4	0	Doc (OECD & lit exp.)	3	B(QSAR)	1	V(OECD exp.)	0.707107	(M4-5)	(P3-4)	(P1-2)	N	N	-	1.745	OECD exp.	1.845	0.01	lit exp.	4	1.80783	0.0686556	5	1900	OECD exp.	4	1870.45	0.693822	8	3	B(QSAR)	-	-	4	32.6	OECD exp.	0.000852585	OECD exp.
p99-08-1,s1321-12-6	Cc1cccc(c1)N(=O)=O	3-nitrotoluene:nitrotoluene	parent_chemical,salt_or_mixture_component	137.139	organic	neutral	4	Transient	1.41421		3	0	Doc (OECD & lit exp.)	4	B(QSAR)	1	V(Lit exp.)	1.41421	(M2-3)	(P3-4)	(P3-4)	N	N	-	2.49	OECD exp.	2.42	0	lit exp.	3	2.31039	0.0947749	5	500	EPI exp.	3	726.284	0.820221	8	4	B(QSAR)	-	-	-	19.7	Lit. Exp.	0.00277651	Lit exp.
p99-34-3	OC(=O)c1cc(cc(c1)N(=O)=O)N(=O)=O	3,5-dinitrobenzoic acid	parent_chemical	212.119	organic	ionizable	5	5	0		5	0	Doc (OECD & lit exp.)	4	B(QSAR)	4	B(QSAR) V(QSAR avg.)	0	(M2-3)	(P3-4)	(P3-4)	A	0.1	Exp (OECD)	-8.374	OECD exp.	-0.00859996	1.81773	Avg. QSAR	5	-3.9686	3.80298	5	1350	EPI exp.	5	4.56975e+12	1.05832	8	4	B(QSAR)	-	-	-	0.000279175	QSAR avg.	6.12098e-09	QSAR avg.
p99-51-4	O=N(=O)c1ccc(c(c1)C)C	4-nitro-o-xylene	parent_chemical	151.166	organic	neutral	Transient	Transient	1.35401		3	1.1547	Swater (Avg. QSAR)	1	H(OECD exp.)	1	V(QSAR avg.) H(OECD exp.)	0.707107	(M4-5)	(P3-4)	(P3-4)	N	N	-	-	-	-0.154		OECD exp	3	2.79845	0.127332	5	211.024	QSAR avg	3	211.024	0.711526	8	4	B(QSAR)	1	OECD exp.	-	21.73	OECD exp.	0.00142864	QSAR avg.
p99-54-7	O=N(=O)c1ccc(c(c1)Cl)Cl	1,2-dichloro-4-nitrobenzene	parent_chemical	192.002	organic	neutral	Transient	Transient	0		3	0	Doc (OECD & lit exp.)	1	H(LHC QSAR)	1	H(LHC QSAR)	0	(M2-3)	(P3-4)	(P3-4)	N	N	-	2.575	OECD exp.	3.11573	0.0466959	Avg. QSAR	3	3.11573	0.0466959	5	121	EPI exp.	3	74.2168	0.70931	8	4	B(QSAR)	1	LHC QSAR	-	2	OECD exp.	0.00033002	EPI exp.
p99-55-8,h72621-59-1,h1048007-94-8	O=N(=O)c1ccc(c(c1)N)C	5-nitro-o-toluidine	hydrolysis_product,parent_chemical	152.154	organic	ionizable	4.5	4.5	0		4	0	Swater (Avg. QSAR)	4	B(QSAR)	4	B(QSAR) V(QSAR avg.)	0	(M2-3)	(P3-4)	(P3-4)	B	2.36334	QSAR (SPARC)	-	-	1.64125	0.748355	Avg. QSAR	4	1.63729	0.744688	5	1434.11	QSAR avg	4	1434.11	0.848621	8	4	B(QSAR)	-	-	-	0.0543629	QSAR avg.	1.18205e-06	QSAR avg.
p99-57-0	O=N(=O)c1ccc(c(c1)N)O	2-amino-4-nitrophenol	parent_chemical	154.126	organic	ionizable	4	4	2.41523		3	2.3094	Swater (EPI exp.)	4	B(QSAR)	4	B(QSAR) V(QSAR avg.)	0.707107	(M4-5)	(P3-4)	(P3-4)	amph	amphoprotic	-	-	-	6.732		OECD exp	5	0.161226	1.02547	5	925	EPI exp.	5	279478	2.53156	8	4	B(QSAR)	-	-	-	0.0046929	OECD exp.	4.05911e-10	QSAR avg.
p99-59-2	COc1ccc(cc1N)N(=O)=O	5-nitro-o-anisidine	parent_chemical	168.153	organic	ionizable	4	4	0.707107		3	0	Swater (EPI exp.)	4	B(QSAR)	4	B(QSAR) V(QSAR avg.)	0.707107	(M2-3)	(P3-4)	(P3-4)	B	8.77392	Exp (OECD (log))	-	-	-3.61392		OECD exp	5	-0.857998	2.3611	5	115	EPI exp.	5	8.20758e+07	0.987042	8	4	B(QSAR)	-	-	-	0.0129534	QSAR avg.	2.22368e-07	QSAR avg.
p99-61-6	O=Cc1cccc(c1)N(=O)=O	3-nitrobenzaldehyde	parent_chemical	151.122	organic	neutral	2	2	0.707107		4	0	Swater (EPI exp.)	2	B(QSAR)	2	B(QSAR)	0.707107	(M4-5)	(P3-4)	(P1-2)	N	N	-	-	-	1.46566	0.131124	Avg. QSAR	4	1.46566	0.131124	5	1630	EPI exp.	4	3231.35	0.965555	8	2	B(QSAR)	-	-	-	0.966425	EPIwin Exp.	6.52722e-06	QSAR avg.
p99-62-7	CC(c1cccc(c1)C(C)C)C	1,3-diisopropylbenzene	parent_chemical	162.277	organic	neutral	3	Transient	0.912871		2	0.57735	Swater (Avg. QSAR)	3	B(QSAR)	1	V(QSAR avg.)	0.707107	(M2-3)	(P3-4)	(P1-2)	N	N	-	-	-	5.13		OECD exp	2	4.64953	0.296357	5	7.17057	QSAR avg	2	7.17057	0.954302	8	3	B(QSAR)	4	OECD exp.	-	52.3869	EPIwin Exp.	1.09863	QSAR avg.
p99-63-8	ClC(=O)c1cccc(c1)C(=O)Cl	isophthaloyl dichloride	parent_chemical	203.025	organic	neutral	4.5	4.5	1.41421		4	0	Swater (Avg. QSAR)	4	B(QSAR)	4	B(QSAR) V(QSAR avg.)	1.41421	(M4-5)	(P3-4)	(P1-2)	N	N	-	-	-	1.97848	0.64435	Avg. QSAR	4	1.97848	0.64435	5	6391.24	QSAR avg	4	6391.24	2.10603	8	4	B(QSAR)	-	-	-	0.627612	QSAR avg.	0.000103081	QSAR avg.
p99-66-1	CCCC(C(=O)O)CCC	2-propylvaleric acid	parent_chemical	144.215	organic	ionizable	Unstable MOC	Unstable MOC	0		4	0	Swater (EPI exp.)	1	B(QSAR)	1	B(QSAR)	0	(M4-5)	(P1-2)	(P1-2)	A	4.6	Exp (CRC)	-	-	-2.65		lit exp.	5	-1.08484	1.63285	5	2000	EPI exp.	5	2.47918e+08	0.749014	8	1	B(QSAR)	-	-	-	7.84415	QSAR avg.	0.000123668	QSAR avg.
p99-75-2	COC(=O)c1ccc(cc1)C	methyl p-toluate	parent_chemical	150.178	organic	neutral	Transient	Transient	0		3	0	Swater (Avg. QSAR)	1	B(QSAR)	1	B(QSAR) V(QSAR avg.)	0	(M2-3)	(P1-2)	(P1-2)	N	N	-	-	-	2.7		lit exp.	3	2.34871	0.11614	5	757.849	QSAR avg	3	757.849	0.3991	8	1	B(QSAR)	4	OECD exp.	-	21.6075	QSAR avg.	0.00125511	QSAR avg.
p99-76-3	COC(=O)c1ccc(cc1)O	methyl 4-hydroxybenzoate	parent_chemical	152.151	organic	ionizable	Unstable MOC	Unstable MOC	0.5		5	0.5	Doc (PP-LFER)	1	B(exp)	1	B(exp)	0	(M2-3)	(P1-2)	(P1-2)	A	8.4	Exp (OECD)	-0.309874	PP-LFER	0.349226	0	lit exp.	5	0.338752	0.291418	5	76724.1	OECD exp.	5	284478	0.84408	8	1	B(exp)	4	Hydrowin	-	5.5e-05	OECD exp.	1.79661e-09	OECD exp.
p99-82-1	CC1CCC(CC1)C(C)C	1-isopropyl-4-methylcyclohexane	parent_chemical	140.27	organic	neutral	Transient	Transient	0.57735		2	0.57735	Doc (OECD & lit exp.)	2	B(QSAR)	1	V(EPI exp.)	0	(M2-3)	(P1-2)	(P1-2)	N	N	-	3.316	OECD exp.	4.71746	0.724486	Avg. QSAR	1	4.71746	0.724486	5	0.28	EPI exp.	2	19.0086	2.3525	8	2	B(QSAR)	-	-	-	352	OECD exp.	71.9745	EPI exp.
p99-87-6	Cc1ccc(cc1)C(C)C	p-cymene	parent_chemical	134.223	organic	neutral	1	Transient	0.57735		3	0.57735	Doc (PP-LFER)	2	B(QSAR)	1	V(Lit exp.)	0	(M2-3)	(P1-2)	(P1-2)	N	N	-	2.9198	PP-LFER	4.1	0	lit exp.	2	3.86597	0.239948	5	23.4	EPI exp.	2	38.9946	0.879345	8	2	B(QSAR)	-	-	-	218.612	EPIwin Exp.	0.316228	Lit exp.
p99-88-7,h31027-31-3	CC(c1ccc(cc1)N)C	4-isopropylaniline	hydrolysis_product,parent_chemical	135.21	organic	ionizable	4.5	2	1.41421		4	0	Doc (OECD & lit exp.)	4	B(QSAR)	2	V(QSAR avg.)	1.41421	(M2-3)	(P1-2)	(P1-2)	B	5.12427	QSAR (SPARC)	1.24428	OECD exp.	1.9753	0.539179	Avg. QSAR	4	1.51301	0.141642	5	9601.6	QSAR avg	4	9601.6	0.431552	8	4	B(QSAR)	-	-	-	11.1055	OECD exp.	0.000182859	QSAR avg.
p99-93-4	CC(=O)c1ccc(cc1)O	4'-hydroxyacetophenone	parent_chemical	136.151	organic	ionizable	Unstable MOC	Unstable MOC	0	exp	5	0	Doc (OECD & lit exp.)	1	B(exp)	1	B(exp)	0	(M4-5)	(P1-2)	(P1-2)	A	8.05	Exp (OECD (average))	0.0751543	OECD exp.	-0.604846		lit exp.	5	-0.313654	0.609713	5	9900	EPI exp.	5	3.30707e+06	1.95136	8	1	B(exp)	-	-	-	0.00319	OECD exp.	5.28764e-08	QSAR avg.
p99-96-7,h94-13-3,h99-76-3,h120-47-8,h13031-41-9,h86960-46-5,h297132-04-8,h1174050-26-0	Oc1ccc(cc1)C(=O)O	4-hydroxybenzoic acid	hydrolysis_product,parent_chemical	138.124	organic	neutral	Unstable MOC	Unstable MOC	0.5		5	0.5	Doc (PP-LFER)	1	B(exp)	1	B(exp)	0	(M4-5)	(P1-2)	(P1-2)	N	N	-	0.74358	PP-LFER	1.58		lit exp.	5	-0.429932	1.93073	5	4870	OECD exp.	5	166558	2.35906	8	1	B(exp)	-	-	-	2.11e-05	OECD exp.	2.41544e-10	OECD exp.
p99-97-8	Cc1ccc(cc1)N(C)C	N,N-dimethyl-p-toluidine	parent_chemical	135.21	organic	neutral	4	Transient	0.912871		3	0.57735	Swater (EPI exp.)	3	B(QSAR)	1	V(EPI exp.)	0.707107	(M2-3)	(P3-4)	(P1-2)	N	N	-	-	-	1.729		OECD exp	4	1.87038	0.772467	5	650	EPI exp.	5	12099.8	2.01521	8	3	B(QSAR)	-	-	-	23.7274	EPIwin Exp.	0.00199157	EPI exp.
p99-99-0,s1321-12-6	Cc1ccc(cc1)N(=O)=O	4-nitrotoluene:nitrotoluene	parent_chemical,salt_or_mixture_component	137.139	organic	neutral	4	1	1.41421		3	0	Doc (PP-LFER)	4	B(QSAR)	2	V(EPI exp.)	1.41421	(M4-5)	(P3-4)	(P1-2)	N	N	-	2.01856	PP-LFER	2.37	0	lit exp.	3	2.32809	0.0792035	5	442	EPI exp.	3	645.926	0.719762	8	4	B(QSAR)	-	-	-	2.09281	EPIwin Exp.	0.000230237	EPI exp.
p100-00-5	Clc1ccc(cc1)N(=O)=O	1-chloro-4-nitrobenzene	parent_chemical	157.557	organic	neutral	Transient	Transient	0		3	0	Doc (PP-LFER)	1	H(LHC QSAR)	1	H(LHC QSAR)	0	(M2-3)	(P3-4)	(P3-4)	N	N	-	2.0964	PP-LFER	2.395	0.00707107	lit exp.	3	2.4657	0.0649996	5	243	OECD exp.	3	364.998	0.693156	8	4	B(QSAR)	1	LHC QSAR	-	2.9127	OECD exp.	0.00020181	OECD exp.
p100-01-6	Nc1ccc(cc1)N(=O)=O	4-nitroaniline	parent_chemical	138.127	organic	neutral	4.5	4.5	0.57735		4	0.57735	Doc (PP-LFER)	4	B(QSAR)	4	B(QSAR) V(Lit exp.)	0	(M4-5)	(P3-4)	(P1-2)	N	N	-	1.31582	PP-LFER	1.2		OECD exp	5	1.01227	0.669042	5	728	EPI exp.	4	3534.58	0.549692	8	4	B(QSAR)	-	-	-	0.0363	Lit. Exp.	2.88403e-08	Lit exp.
p100-02-7,h100-00-5,h350-46-9,h64131-85-7,h144163-97-3	Oc1ccc(cc1)N(=O)=O	4-nitrophenol	hydrolysis_product,parent_chemical	139.111	organic	ionizable	5	5	0.707107		5	0	Doc (PP-LFER)	3	B(QSAR)	3	B(QSAR)	0.707107	(M4-5)	(P1-2)	(P1-2)	A	7.15	Exp (CRC)	-1.41717	PP-LFER	-0.940613	0	lit exp.	5	-0.498627	0.784394	5	11600	EPI exp.	5	6.84663e+06	1.17088	8	3	B(QSAR)	-	-	-	0.0130501	EPIwin Exp.	1.54882e-08	Lit exp.
p100-06-1	COc1ccc(cc1)C(=O)C	4'-methoxyacetophenone	parent_chemical	150.178	organic	neutral	Unstable MOC	Unstable MOC	0		4	0	Doc (PP-LFER)	1	B(QSAR)	1	B(QSAR)	0	(M2-3)	(P1-2)	(P1-2)	N	N	-	1.3631	PP-LFER	1.67997	0.213702	Avg. QSAR	4	1.67997	0.213702	5	2146.25	QSAR avg	4	2146.25	0.441735	8	1	B(QSAR)	-	-	-	0.858452	EPIwin Exp.	7.32825e-05	Lit exp.
p100-18-5	CC(c1ccc(cc1)C(C)C)C	1,4-diisopropylbenzene	parent_chemical	162.277	organic	neutral	3	Transient	0.866025		2	0.5	Doc (OECD & lit exp.)	3	B(QSAR)	1	V(QSAR avg.)	0.707107	(M2-3)	(P1-2)	(P1-2)	N	N	-	3.8	OECD exp.	5.23		OECD exp	2	4.6557	0.301194	5	6.90217	QSAR avg	2	6.90217	1.02109	8	3	B(QSAR)	4	OECD exp.	-	32.8	OECD exp.	1.02564	QSAR avg.
p100-20-9	ClC(=O)c1ccc(cc1)C(=O)Cl	terephthaloyl dichloride	parent_chemical	203.025	organic	neutral	4.5	4.5	1.41421		4	0	Swater (Avg. QSAR)	4	B(QSAR)	4	B(QSAR) V(QSAR avg.)	1.41421	(M4-5)	(P1-2)	(P1-2)	N	N	-	-	-	1.99101	0.635523	Avg. QSAR	4	1.99101	0.635523	5	6375.36	QSAR avg	4	6375.36	2.1126	8	4	B(QSAR)	-	-	-	0.0012	OECD exp.	8.02954e-05	QSAR avg.
p100-21-0,h100-20-9,h120-61-6,h1962-75-0,h6422-86-2,h7195-44-0	OC(=O)c1ccc(cc1)C(=O)O	terephthalic acid	hydrolysis_product,parent_chemical	166.134	organic	neutral	Transient	Transient	0	exp	2	0	Swater (EPI exp.)	1	B(exp)	1	B(exp) PT(exp.)	0	(M4-5)	(P1-2)	(P1-2)	N	N	-	-	-	-1.46515	2.98752	Avg. QSAR	5	-1.46515	2.98752	5	15	EPI exp.	5	63634.7	2.07835	8	1	B(exp)	-	-	1	0.00122636	EPIwin Exp.	6.47742e-11	QSAR avg.
p100-37-8,h18109-80-3,h26090-29-9	OCCN(CC)CC	2-diethylaminoethanol	hydrolysis_product,parent_chemical	117.192	organic	ionizable	3	3	0.707107		5	0	Doc (OECD & lit exp.)	2	B(QSAR)	2	B(QSAR)	0.707107	(M4-5)	(P3-4)	(P3-4)	B	9.87	Exp (OECD)	-4.37433	OECD exp.	-1.12242	1.44312	Avg. QSAR	5	-3.47042	2.18551	5	1000000	EPI exp.	5	2.79207e+11	1.1729	8	2	B(QSAR)	-	-	-	186.62	EPIwin Exp.	4.76812e-07	QSAR avg.
p100-39-0	BrCc1ccccc1	α-bromotoluene	parent_chemical	171.042	organic	neutral	Transient	Transient	0		3	0	Swater (Avg. QSAR)	1	H(LHC QSAR)	1	V(QSAR avg.) H(LHC QSAR)	0	(M2-3)	(P3-4)	(P3-4)	N	N	-	-	-	2.92	0	lit exp.	3	2.75233	0.142277	5	299.313	QSAR avg	3	299.313	0.697738	8	2	B(QSAR)	1	LHC QSAR	-	59.985	EPIwin Exp.	0.0179924	QSAR avg.
p100-40-3	C=CC1CCC=CC1	4-vinylcyclohexene	parent_chemical	108.184	organic	neutral	Transient	Transient	1		2	0.707107	Swater (EPI exp.)	2	B(QSAR)	1	V(OECD exp.)	0.707107	(M2-3)	(P1-2)	(P1-2)	N	N	-	-	-	3.23425	0.528662	Avg. QSAR	2	3.23425	0.528662	5	50	EPI exp.	3	184.497	0.872637	8	2	B(QSAR)	-	-	-	2046.5	OECD exp.	1.83244	OECD exp.
p100-41-4	CCc1ccccc1	ethylbenzene	parent_chemical	106.168	organic	neutral	1	Transient	0.866025		3	0.5	Doc (OECD & lit exp.)	2	B(QSAR)	1	V(Lit exp.)	0.707107	(M2-3)	(P1-2)	(P1-2)	N	N	-	2.71	OECD exp.	3.6		OECD exp	3	2.98086	0.132724	5	169	EPI exp.	3	253.485	0.700463	8	2	B(QSAR)	-	-	-	1276.8	OECD exp.	0.263027	Lit exp.
p100-42-5	C=Cc1ccccc1	styrene	parent_chemical	104.153	organic	neutral	1	Transient	0.707107		3	0	Doc (PP-LFER)	2	B(QSAR)	1	V(OECD exp.)	0.707107	(M2-3)	(P1-2)	(P1-2)	N	N	-	2.07684	PP-LFER	2.98333	0.057735	lit exp.	3	2.73736	0.221716	5	310	EPI exp.	3	300.292	0.625222	8	2	B(QSAR)	-	-	4	852.1	OECD exp.	0.0787061	OECD exp.
p100-43-6	C=Cc1ccncc1	4-vinylpyridine	parent_chemical	105.14	organic	ionizable	3	Unstable MOC	0.57735		5	0.57735	Swater (EPI exp.)	2	B(QSAR)	1	V(EPI exp.)	0	(M2-3)	(P1-2)	(P1-2)	B	5.15592	QSAR (SPARC)	-	-	0.174766		OECD exp	5	0.580291	0.397424	5	29100	EPI exp.	5	171119	0.930714	8	2	B(QSAR)	-	-	-	226.61	EPIwin Exp.	0.000330429	EPI exp.
p100-44-7,h98-87-3,h29797-40-8	ClCc1ccccc1	α-chlorotoluene	hydrolysis_product,parent_chemical	126.586	organic	neutral	Transient	Transient	0	exp	2	0	Swater (EPI exp.)	1	B(exp) H(LHC QSAR)	1	B(exp) V(EPI exp.) H(LHC QSAR)	0	(M2-3)	(P3-4)	(P1-2)	N	N	-	-	-	2.3	0	lit exp.	3	2.58439	0.136996	5	20	EPI exp.	3	488.229	0.625569	8	1	B(exp)	1	LHC QSAR	-	160	OECD exp.	0.0168486	EPI exp.
p100-46-9,h39072-70-3,h175481-26-2,h705283-58-5,h943516-53-8	NCc1ccccc1	benzylamine	hydrolysis_product,parent_chemical	107.156	organic	ionizable	Unstable MOC	Unstable MOC	0	exp	5	0	Doc (OECD & lit exp.)	1	B(exp)	1	B(exp)	0	(M2-3)	(P1-2)	(P1-2)	B	9.38333	Exp (OECD (average))	-3.02584	OECD exp.	-6.77334		OECD exp	5	-2.46078	1.82891	5	1000000	EPI exp.	5	1.06269e+10	1.39478	8	1	B(exp)	-	-	-	87	OECD exp.	2.59488e-06	OECD exp.
p100-47-0	N#Cc1ccccc1	benzonitrile	parent_chemical	103.124	organic	neutral	Unstable MOC	Unstable MOC	0		4	0	Doc (PP-LFER)	1	B(exp)	1	B(exp) V(Lit exp.)	0	(M2-3)	(P1-2)	(P3-4)	N	N	-	1.05626	PP-LFER	1.56	2.71948e-16	lit exp.	4	1.64716	0.146021	5	2000	EPI exp.	4	2073.4	0.501371	8	1	B(exp)	-	-	-	110	Lit. Exp.	0.000812831	Lit exp.
p100-50-5,h6600-31-3	O=CC1CCC=CC1	cyclohex-3-ene-1-carbaldehyde	hydrolysis_product,parent_chemical	110.157	organic	neutral	Unstable MOC	Unstable MOC	0.57735		5	0.57735	Swater (OECD & lit exp.)	1	B(QSAR)	1	B(QSAR) V(QSAR avg.)	0	(M4-5)	(P1-2)	(P1-2)	N	N	-	-	-	1.50342	0.223347	Avg. QSAR	4	1.50342	0.223347	5	11600	OECD exp.	5	10327.6	0.932045	8	1	B(QSAR)	-	-	-	2275.6	QSAR avg.	0.00199165	QSAR avg.
p100-51-6,h85-68-7,h100-39-0,h100-44-7,h103-50-4,h118-58-1,h120-51-4,h122-63-4,h140-11-4,h501-53-1,h2495-37-6,h16883-83-3,h69901-75-3,h87428-99-7,h87460-09-1,h92700-68-0,h95748-46-2,h106410-46-2,h137863-20-8,h274693-53-7,h402913-84-2,h510729-01-8	OCc1ccccc1	benzyl alcohol	hydrolysis_product,parent_chemical	108.141	organic	neutral	Unstable MOC	Unstable MOC	0		5	0	Doc (PP-LFER)	1	B(exp)	1	B(exp)	0	(M4-5)	(P1-2)	(P1-2)	N	N	-	0.53694	PP-LFER	1.09333	0.011547	lit exp.	5	1.13902	0.070275	5	42900	EPI exp.	5	20988.7	0.608883	8	1	B(exp)	-	-	-	32.452	OECD exp.	1.38038e-05	Lit exp.
p100-52-7,h98-87-3,h622-29-7,h29797-40-8	O=Cc1ccccc1	benzaldehyde	hydrolysis_product,parent_chemical	106.125	organic	neutral	Unstable MOC	Unstable MOC	0	exp	4	0	Doc (OECD & lit exp.)	1	B(exp)	1	B(exp) V(Lit exp.)	0	(M4-5)	(P1-2)	(P1-2)	N	N	-	1.05	OECD exp.	1.48	2.71948e-16	lit exp.	4	1.55067	0.158481	5	6950	EPI exp.	4	5470.65	0.500316	8	1	B(exp)	-	-	-	93	OECD exp.	0.00112202	Lit exp.
p100-54-9	N#Cc1cccnc1	nicotinonitrile	parent_chemical	104.112	organic	neutral	3	3	0.707107		5	0	Doc (PP-LFER)	2	B(QSAR)	2	B(QSAR)	0.707107	(M2-3)	(P3-4)	(P1-2)	N	N	-	-0.04104	PP-LFER	0.23		lit exp.	5	0.507239	0.11337	5	135000	EPI exp.	5	52657.2	1.12547	8	2	B(QSAR)	-	-	-	39.4568	EPIwin Exp.	1.12202e-05	Lit exp.
p100-61-8,h10591-84-1	CNc1ccccc1	N-methylaniline	hydrolysis_product,parent_chemical	107.156	organic	ionizable	5	Unstable MOC	0.707107		5	0	Doc (PP-LFER)	3	B(QSAR)	1	V(Lit exp.)	0.707107	(M2-3)	(P3-4)	(P3-4)	B	4.85	Exp (OECD)	0.289538	PP-LFER	0.752618		lit exp.	5	0.864257	0.2671	5	5620	EPI exp.	5	47199.4	0.60172	8	3	B(QSAR)	-	-	-	59.8	Lit. Exp.	0.000363078	Lit exp.
p100-63-0,h89-33-8,h3520-72-7,h6358-87-8,h6401-97-4	NNc1ccccc1	phenylhydrazine	hydrolysis_product,parent_chemical	108.144	organic	ionizable	5	5	1.41421		5	0	Swater (EPI exp.)	4	B(QSAR)	4	B(QSAR) V(EPI exp.)	1.41421	(M2-3)	(P1-2)	(P1-2)	B	8.79	Exp (CRC)	-	-	0.292328	0.669544	Avg. QSAR	5	-1.62367	2.874	5	127000	EPI exp.	5	1.47302e+10	1.72139	8	4	B(QSAR)	-	-	-	3.4658	EPIwin Exp.	1.80754e-07	EPI exp.
p100-64-1	ON=C1CCCCC1	cyclohexanone oxime	parent_chemical	113.16	organic	ionizable	3	3	0.707107		5	0	Doc (PP-LFER)	2	B(QSAR) H(LHC QSAR)	2	B(QSAR) H(LHC QSAR)	0.707107	(M4-5)	(P1-2)	(P1-2)	amph	amphoprotic	-	0.448	PP-LFER	1.01896	0.536915	Avg. QSAR	5	1.01896	0.536915	5	18000	EPI exp.	5	16048.4	1.55537	8	2	B(QSAR)	2	LHC QSAR	-	3.7324	EPIwin Exp.	9.48755e-06	EPI exp.
p100-66-3	COc1ccccc1	anisole	parent_chemical	108.141	organic	neutral	Unstable MOC	Unstable MOC	0		4	0	Doc (PP-LFER)	1	B(exp)	1	B(exp) V(OECD exp.)	0	(M4-5)	(P3-4)	(P1-2)	N	N	-	1.5162	PP-LFER	2.11	0	lit exp.	4	2.01863	0.205567	5	1710	OECD exp.	4	2320.8	0.714171	8	1	B(exp)	-	-	-	468.537	OECD exp.	0.0119594	OECD exp.
p100-68-5	CSc1ccccc1	methyl phenyl sulphide	parent_chemical	124.205	organic	neutral	2	Unstable MOC	0.912871		4	0.57735	Doc (PP-LFER)	2	B(QSAR)	1	V(Lit exp.)	0.707107	(M2-3)	(P1-2)	(P1-2)	N	N	-	1.99106	PP-LFER	2.47		lit exp.	3	2.6182	0.16487	5	506	EPI exp.	3	461.321	0.559369	8	2	B(QSAR)	-	-	-	64.6505	EPIwin Exp.	0.01	Lit exp.
p100-69-6	C=Cc1ccccn1	2-vinylpyridine	parent_chemical	105.14	organic	ionizable	3	Unstable MOC	0.57735		5	0.57735	Swater (EPI exp.)	2	B(QSAR)	1	V(EPI exp.)	0	(M2-3)	(P1-2)	(P1-2)	B	5.13061	QSAR (SPARC)	-	-	0.37837		OECD exp	5	0.688773	0.647991	5	27500	EPI exp.	5	149599	1.01018	8	2	B(QSAR)	-	-	-	370.574	EPIwin Exp.	0.000572525	EPI exp.
p100-83-4	O=Cc1cccc(c1)O	3-hydroxybenzaldehyde	parent_chemical	122.124	organic	ionizable	Unstable MOC	Unstable MOC	0		4	0	Swater (EPI exp.)	1	B(QSAR)	1	B(QSAR)	0	(M4-5)	(P1-2)	(P1-2)	A	8.98	Exp (CRC)	-	-	0.320388		lit exp.	5	0.260473	0.437275	5	7190	EPI exp.	5	183723	0.62908	8	1	B(QSAR)	-	-	-	0.209347	QSAR avg.	1.07152e-07	Lit exp.
p100-97-0	C1N2CN3CN1CN(C2)C3	methenamine	parent_chemical	140.189	organic	ionizable	Unstable MOC	Unstable MOC	0	exp	5	0	Swater (OECD & lit exp.)	1	B(exp)	1	B(exp)	0	(M4-5)	(P3-4)	(P3-4)	B	9.30546	QSAR (SPARC)	-	-	-7.48546		OECD exp	5	-4.88544	3.23585	5	1.81421e+11	OECD exp.	5	4.40423e+13	2.62599	8	1	B(exp)	-	-	-	0.5332	EPIwin Exp.	6.70672e-08	EPI exp.
p100-99-2	CC(C[Al](CC(C)C)CC(C)C)C	triisobutylaluminium	parent_chemical	198.33	organo_metallic	neutral	Transient	Transient	2		3	1.41421	Swater (Avg. QSAR)	1	H(LHC QSAR)	1	H(LHC QSAR)	1.41421	(M1)	(P3-4)	(P3-4)	N	N	-	-	-	5.86251	1.00458	Avg. QSAR	1	5.86251	1.00458	4	144.851	QSAR avg	3	144.851	2.36205	6	4	B(QSAR)	1	LHC QSAR	-	1.5996	QSAR avg.	-	-
p101-02-0	c1ccc(cc1)OP(Oc1ccccc1)Oc1ccccc1	triphenyl phosphite	parent_chemical	310.291	organic	neutral	4	4	1.58114		2	0.707107	Swater (Avg. QSAR)	4	B(QSAR)	4	B(QSAR) V(QSAR avg.)	1.41421	(M1)	(P3-4)	(P3-4)	N	N	-	-	-	5.29191	1.17979	Avg. QSAR	1	5.29191	1.17979	4	1.11719	QSAR avg	2	1.11719	1.18188	6	4	B(QSAR)	-	-	-	0.069	OECD exp.	2.2124e-05	QSAR avg.
p101-14-4	Nc1ccc(cc1Cl)Cc1ccc(c(c1)Cl)N	4,4'-methylenebis[2-chloroaniline]	parent_chemical	267.159	organic	ionizable	4	4	0		2	0	Doc (OECD & lit exp.)	4	B(QSAR)	4	B(QSAR) V(QSAR avg.)	0	(M2-3)	(P3-4)	(P3-4)	B	3.13623	QSAR (SPARC)	4.1493	OECD exp.	3.65802	0.229259	Avg. QSAR	2	3.63574	0.219662	5	13.9	EPI exp.	2	9.68214	0.494677	8	4	B(QSAR)	-	-	-	0.000263447	QSAR avg.	4.52787e-09	QSAR avg.
p101-20-2	O=C(Nc1ccc(c(c1)Cl)Cl)Nc1ccc(cc1)Cl	triclocarban	parent_chemical	315.588	organic	neutral	4	4	0.707107		2	0.707107	Swater (Avg. QSAR)	4	B(QSAR)	4	B(QSAR) V(QSAR avg.)	0	(M2-3)	(P3-4)	(P3-4)	N	N	-	-	-	4.86797	0.257101	Avg. QSAR	1	4.86797	0.257101	5	0.57852	QSAR avg	2	0.57852	0.655593	8	4	B(QSAR)	-	-	-	5.04894e-07	QSAR avg.	4.97542e-08	QSAR avg.
p101-37-1	C=CCOc1nc(OCC=C)nc(n1)OCC=C	2,4,6-triallyloxy-1,3,5-triazine	parent_chemical	249.271	organic	neutral	4	4	1.48324		3	0.447214	Doc (OECD & lit exp.)	3	B(QSAR)	3	B(QSAR)	1.41421	(M2-3)	(P3-4)	(P1-2)	N	N	-	2.6	OECD exp.	2.8		OECD exp	2	3.45036	1.14488	5	310	OECD exp.	3	222.217	1.17073	8	3	B(QSAR)	-	-	-	0.0141832	QSAR avg.	8.84752e-06	QSAR avg.
p101-39-3	O=C/C(=C/c1ccccc1)/C	α-methylcinnamaldehyde	parent_chemical	146.19	organic	neutral	Transient	Transient	0	exp	3	0	Swater (OECD & lit exp.)	1	B(exp)	1	B(exp)	0	(M2-3)	(P1-2)	(P1-2)	N	N	-	-	-	2.471		OECD exp	3	2.39237	0.0805909	5	490	OECD exp.	3	890.439	0.669136	8	1	B(exp)	-	-	-	1.9995	EPIwin Exp.	9.95152e-05	QSAR avg.
p101-41-7	COC(=O)Cc1ccccc1	methyl phenylacetate	parent_chemical	150.178	organic	neutral	Unstable MOC	Unstable MOC	0		4	0	Swater (Avg. QSAR)	1	B(QSAR)	1	B(QSAR) V(QSAR avg.)	0	(M2-3)	(P1-2)	(P1-2)	N	N	-	-	-	1.88	0.0707107	lit exp.	4	1.92049	0.189791	5	2619.9	QSAR avg	4	2619.9	1.08042	8	1	B(QSAR)	4	Hydrowin	-	27.9147	QSAR avg.	0.000700643	QSAR avg.
p101-43-9	O=C(C(=C)C)OC1CCCCC1	cyclohexyl methacrylate	parent_chemical	168.237	organic	neutral	Transient	Transient	0	exp	3	0	Doc (OECD & lit exp.)	1	B(exp)	1	B(exp) V(QSAR avg.)	0	(M2-3)	(P1-2)	(P1-2)	N	N	-	2.2734	OECD exp.	3.12096	0.245789	Avg. QSAR	3	3.12096	0.245789	5	133	OECD exp.	3	614.827	1.08344	8	1	B(exp)	4	OECD exp.	-	29.3372	QSAR avg.	0.00964922	QSAR avg.
p101-54-2	Nc1ccc(cc1)Nc1ccccc1	N-(4-aminophenyl)aniline	parent_chemical	184.242	organic	ionizable	4.5	4.5	0.816497	exp	4	0.816497	Doc (OECD & lit exp.)	3	H(OECD exp.)	3	H(OECD exp.)	0	(M2-3)	(P3-4)	(P3-4)	B	5.46	Exp (OECD (avg))	1.2452	OECD exp.	1.85111	0.513984	Avg. QSAR	4	1.26119	0.932496	5	17904.2	OECD exp.	5	16930	0.925244	8	4	B(QSAR)	3	OECD exp.	-	0.000166	OECD exp.	2.0574e-08	OECD exp.
p101-68-8	O=C=Nc1ccc(cc1)Cc1ccc(cc1)N=C=O	4,4'-methylenediphenyl diisocyanate	parent_chemical	250.258	organic	neutral	Unstable MOC	Unstable MOC	1.35401		4	1.1547	Swater (Avg. QSAR)	1	H(LHC QSAR)	1	H(LHC QSAR)	0.707107	(M2-3)	(P3-4)	(P1-2)	N	N	-	-	-	4.51		OECD exp	2	3.53805	1.18889	5	1485.6	QSAR avg	4	1485.6	2.63353	8	4	B(QSAR)	1	LHC QSAR	-	0.0006665	EPIwin Exp.	1.83024e-05	QSAR avg.
p101-72-4	CC(Nc1ccc(cc1)Nc1ccccc1)C	N-isopropyl-N'-phenyl-p-phenylenediamine	parent_chemical	226.323	organic	ionizable	4.5	4.5	0.707107		4	0.707107	Swater (Avg. QSAR)	4	B(QSAR)	4	B(QSAR) V(QSAR avg.)	0	(M2-3)	(P3-4)	(P3-4)	B	4.67109	QSAR (SPARC)	-	-	2.78409	0.872032	Avg. QSAR	3	2.48207	0.729875	5	2709.13	QSAR avg	4	2709.13	2.03547	8	4	B(QSAR)	-	-	-	0.00519965	QSAR avg.	1.61745e-07	QSAR avg.
p101-77-9,h101-68-8,h13676-54-5,h54112-23-1,h58890-25-8,h77703-56-1	Nc1ccc(cc1)Cc1ccc(cc1)N	4,4'-methylenedianiline	hydrolysis_product,parent_chemical	198.269	organic	ionizable	5	Unstable MOC	0.447214		5	0.447214	Doc (PP-LFER)	4	B(QSAR)	1	PT(exp.)	0	(M1)	(P3-4)	(P3-4)	B	4.96	Exp (OECD)	0.791215	PP-LFER	0.544815		OECD exp	4	1.29996	0.178972	5	10221.3	OECD exp.	4	5439.31	1.30285	8	4	B(QSAR)	-	-	1	7.595e-05	OECD exp.	6.01777e-09	OECD exp.
p101-80-4	Nc1ccc(cc1)Oc1ccc(cc1)N	4,4'-oxydianiline	parent_chemical	200.242	organic	ionizable	4.5	Unstable MOC	1.44338	exp	4	1.25831	Doc (OECD & lit exp.)	4	B(QSAR) H(OECD exp.)	1	V(OECD exp.)	0.707107	(M2-3)	(P3-4)	(P1-2)	B	4.26054	QSAR (SPARC)	1.20945	OECD exp.	1.11201	0.806542	Avg. QSAR	5	0.931788	0.638888	5	135.455	OECD exp.	4	2975.49	0.942478	8	4	B(QSAR)	4	OECD exp.	-	130	OECD exp.	0.218892	OECD exp.
p101-83-7,s62965-37-1	C1CCC(CC1)NC1CCCCC1	dicyclohexylamine:L-Valine, 3-methyl-N-[(phenylmethoxy)carbonyl]-, compd. with N-cyclohexylcyclohexanamine (1:1)	parent_chemical,salt_or_mixture_component	181.323	organic	ionizable	Unstable MOC	Unstable MOC	0		5	0	Swater (Avg. QSAR)	1	B(exp)	1	B(exp) V(QSAR avg.)	0	(M2-3)	(P1-2)	(P1-2)	B	10.4	Exp (CRC)	-	-	2.00008	1.80524	Avg. QSAR	5	-0.559924	2.21925	5	1.23554e+09	QSAR avg	5	1.23554e+09	1.63438	8	1	B(exp)	-	-	-	4.50554	EPIwin Exp.	0.00114837	QSAR avg.
p101-84-8	c1ccc(cc1)Oc1ccccc1	diphenyl ether	parent_chemical	170.212	organic	neutral	Transient	Transient	0.707107		2	0	Doc (OECD & lit exp.)	2	B(QSAR)	1	V(EPI exp.)	0.707107	(M2-3)	(P3-4)	(P3-4)	N	N	-	3.3	OECD exp.	4.21	0	lit exp.	2	3.84347	0.390647	5	18	EPI exp.	2	36.5454	0.966963	8	2	B(QSAR)	4	OECD exp.	-	2.66	OECD exp.	0.0114096	EPI exp.
p101-96-2	CCC(Nc1ccc(cc1)NC(CC)C)C	N,N'-di-sec-butyl-p-phenylenediamine	parent_chemical	220.36	organic	ionizable	Unstable MOC	Unstable MOC	1.1547		5	1.1547	Swater (Avg. QSAR)	1	H(OECD exp.)	1	H(OECD exp.)	0	(M4-5)	(P3-4)	(P1-2)	B	7.45	Exp (OECD (avg.))	-	-	-0.750154		OECD exp	5	0.948004	1.45365	5	104320	QSAR avg	5	104320	0.927624	8	4	B(QSAR)	1	OECD exp.	-	0.123227	QSAR avg.	5.08569e-06	QSAR avg.
p101-97-3	CCOC(=O)Cc1ccccc1	ethyl phenylacetate	parent_chemical	164.205	organic	neutral	Unstable MOC	Unstable MOC	0.707107		4	0.707107	Swater (Avg. QSAR)	1	B(QSAR)	1	B(QSAR) V(QSAR avg.)	0	(M2-3)	(P1-2)	(P3-4)	N	N	-	-	-	2.28	0	lit exp.	3	2.37264	0.28036	5	1141.73	QSAR avg	4	1141.73	1.25794	8	1	B(QSAR)	4	Hydrowin	-	13.1453	QSAR avg.	0.00102801	QSAR avg.
p102-01-2	O=C(Nc1ccccc1)CC(=O)C	acetoacetanilide	parent_chemical	177.204	organic	ionizable	Unstable MOC	Unstable MOC	0.707107		4	0.707107	Swater (Avg. QSAR)	1	B(QSAR)	1	B(QSAR)	0	(M4-5)	(P1-2)	(P1-2)	amph	amphoprotic	-	-	-	1.03791	0.302121	Avg. QSAR	5	1.03791	0.302121	5	9260.15	QSAR avg	4	9260.15	1.13465	8	1	B(QSAR)	4	OECD exp.	-	0.00016	OECD exp.	1.87187e-08	QSAR avg.
p102-06-7	N=C(Nc1ccccc1)Nc1ccccc1	1,3-diphenylguanidine	parent_chemical	211.268	organic	ionizable	Unstable MOC	Unstable MOC	0.57735	exp	5	0.57735	Swater (OECD & lit exp.)	1	H(OECD exp.)	1	H(OECD exp.)	0	(M2-3)	(P3-4)	(P3-4)	B	9.72952	QSAR (SPARC)	-	-	2.01364	1.48363	Avg. QSAR	5	-0.278169	2.1926	5	7.88559e+08	OECD exp.	5	8.76926e+07	1.4049	8	4	B(QSAR)	1	OECD exp.	-	0.000303074	QSAR avg.	1.93738e-11	OECD exp.
p102-08-9	S=C(Nc1ccccc1)Nc1ccccc1	1,3-diphenyl-2-thiourea	parent_chemical	228.317	organic	ionizable	Transient	Transient	1.70783	exp	2	0.957427	Swater (OECD & lit exp.)	2	H(OECD exp.)	2	H(OECD exp.)	1.41421	(M2-3)	(P3-4)	(P3-4)	amph	amphoprotic	-	-	-	2		OECD exp	3	2.76583	0.658638	5	25.65	OECD exp.	4	1727.82	2.60161	8	3	B(QSAR)	2	OECD exp.	-	0.000185208	QSAR avg.	9.84249e-07	QSAR avg.
p102-09-0	O=C(Oc1ccccc1)Oc1ccccc1	diphenyl carbonate	parent_chemical	214.222	organic	neutral	Transient	Transient	0.707107		2	0	Swater (OECD & lit exp.)	1	H(LHC QSAR)	1	V(QSAR avg.) H(LHC QSAR)	0.707107	(M2-3)	(P3-4)	(P3-4)	N	N	-	-	-	3.43529	0.40033	Avg. QSAR	2	3.43529	0.40033	5	13	OECD exp.	2	39.0389	0.880596	8	3	B(QSAR)	1	LHC QSAR	-	0.019995	EPIwin Exp.	0.00174849	QSAR avg.
p102-20-5	O=C(Cc1ccccc1)OCCc1ccccc1	phenethyl phenylacetate	parent_chemical	240.304	organic	neutral	Transient	Transient	1.87083		2	1.73205	Swater (Avg. QSAR)	2	B(QSAR)	2	B(QSAR)	0.707107	(M2-3)	(P3-4)	(P3-4)	N	N	-	-	-	0.5		OECD exp	2	4.02234	0.415558	5	31.9883	QSAR avg	2	31.9883	1.91134	8	2	B(QSAR)	4	Hydrowin	-	0.0150859	QSAR avg.	7.27056e-05	QSAR avg.
p102-24-9	COB1OB(OC)OB(O1)OC	triboron trimethyl hexaoxide	parent_chemical	173.534	organo_borate	neutral	5	5	0.707107		5	0	Swater (Avg. QSAR)	3	B(QSAR)	3	B(QSAR)	0.707107	(M4-5)	(P3-4)	(P3-4)	N	N	-	-	-	0.503231	4.19942	Avg. QSAR	5	0.503231	4.19942	4	402035	QSAR avg	5	402035	1.19467	6	3	B(QSAR)	-	-	-	1639.59	QSAR avg.	-	-
p102-36-3	O=C=Nc1ccc(c(c1)Cl)Cl	3,4-dichlorophenyl isocyanate	parent_chemical	188.014	organic	neutral	Transient	Transient	0		3	0	Swater (Avg. QSAR)	1	H(LHC QSAR)	1	V(QSAR avg.) H(LHC QSAR)	0	(M2-3)	(P3-4)	(P3-4)	N	N	-	-	-	3.06628	0.65747	Avg. QSAR	3	3.06628	0.65747	5	618.402	QSAR avg	3	618.402	2.35525	8	4	B(QSAR)	1	LHC QSAR	-	74.648	EPIwin Exp.	0.00265275	QSAR avg.
p102-56-7,h3467-59-2	COc1ccc(c(c1)N)OC	2,5-dimethoxyaniline	hydrolysis_product,parent_chemical	153.182	organic	ionizable	2	2	0.866025		4	0.5	Swater (OECD & lit exp.)	2	B(QSAR)	2	B(QSAR)	0.707107	(M2-3)	(P3-4)	(P3-4)	B	3.88822	QSAR (SPARC)	-	-	0.911273		OECD exp	5	0.735286	0.186552	5	3758.92	OECD exp.	5	12421.5	0.262938	8	2	B(QSAR)	-	-	-	0.271225	QSAR avg.	1.99778e-05	QSAR avg.
p102-60-3,h26316-40-5	CC(CN(CC(O)C)CCN(CC(O)C)CC(O)C)O	1,1',1'',1'''-ethylenedinitrilotetrapropan-2-ol	hydrolysis_product,parent_chemical	292.421	organic	ionizable	3	3	0		5	0	Swater (EPI exp.)	2	B(QSAR)	2	B(QSAR)	0	(M4-5)	(P3-4)	(P3-4)	B	polyprotic	-	-	-	-2.89376	1.72577	Avg. QSAR	5	-2.89376	1.72577	5	1000000	EPI exp.	5	5.08171e+06	2.09816	8	2	B(QSAR)	-	-	-	0.00175	OECD exp.	5.65738e-15	QSAR avg.
p102-69-2	CCCN(CCC)CCC	tripropylamine	parent_chemical	143.274	organic	ionizable	4	Transient	0.707107		3	0	Swater (EPI exp.)	3	B(QSAR)	1	V(EPI exp.)	0.707107	(M2-3)	(P3-4)	(P3-4)	B	10.2015	QSAR (SPARC)	-	-	1.20845	1.80811	Avg. QSAR	5	-1.27216	1.96722	5	748	EPI exp.	5	1.75281e+09	1.09394	8	3	B(QSAR)	-	-	-	201.283	EPIwin Exp.	0.0155809	EPI exp.
p102-71-6,s85702-79-0	OCCN(CCO)CCO	2,2',2''-nitrilotriethanol:6-(isononanoylamino)hexanoic acid, compound with 2,2',2''-nitrilotriethanol (1:1)	parent_chemical,salt_or_mixture_component	149.191	organic	ionizable	Unstable MOC	Unstable MOC	0	exp	5	0	Doc (OECD & lit exp.)	1	B(exp)	1	B(exp)	0	(M4-5)	(P3-4)	(P3-4)	B	7.845	Exp (OECD (average))	-2.6584	OECD exp.	-6.14506		OECD exp	5	-4.8155	1.82861	5	6.99942e+09	OECD exp.	5	2.83386e+10	1.89681	8	1	B(exp)	-	-	4	0.000478547	EPIwin Exp.	2.88307e-11	EPI exp.
p102-76-1	CC(=O)OC(COC(=O)C)COC(=O)C	triacetin	parent_chemical	218.208	organic	neutral	Unstable MOC	Unstable MOC	0	exp	5	0	Swater (EPI exp.)	1	B(exp)	1	B(exp)	0	(M4-5)	(P1-2)	(P1-2)	N	N	-	-	-	0.0824315	0.484422	Avg. QSAR	5	0.0824315	0.484422	5	58000	EPI exp.	5	63288.1	0.877723	8	1	B(exp)	4	Hydrowin	-	0.330533	OECD exp.	5.03004e-07	EPI exp.
p102-77-2	O1CCN(CC1)Sc1nc2c(s1)cccc2	2-(morpholinothio)benzothiazole	parent_chemical	252.359	organic	neutral	4	4	1.47196		3	1.29099	Doc (OECD & lit exp.)	4	B(QSAR)	4	B(QSAR) V(QSAR avg.)	0.707107	(M2-3)	(P3-4)	(P3-4)	N	N	-	2.84	OECD exp.	3.4		OECD exp	4	2.04689	0.600183	5	11220.7	QSAR avg	5	11220.7	2.38121	8	4	B(QSAR)	-	-	-	0.000445222	EPIwin Exp.	2.79082e-09	QSAR avg.
p102-81-8,s85204-10-0	CCCCN(CCCC)CCO	2-dibutylaminoethanol:2-Butenedioic acid (Z)-, ester with 1,2-propanediol, compd. with 2-(dibutylamino)ethanol	parent_chemical,salt_or_mixture_component	173.3	organic	ionizable	Unstable MOC	Unstable MOC	0.5		5	0.5	Doc (OECD & lit exp.)	1	B(QSAR)	1	B(QSAR)	0	(M2-3)	(P3-4)	(P3-4)	B	9.67	Exp (OECD)	-3.00333	OECD exp.	-3.81		OECD exp	5	-1.51515	1.94458	5	4000	EPI exp.	5	1.74961e+09	1.19723	8	1	B(QSAR)	-	-	-	8	OECD exp.	0.000116566	OECD exp.
p102-82-9	CCCCN(CCCC)CCCC	tributylamine	parent_chemical	185.355	organic	ionizable	Unstable MOC	Unstable MOC	1.41421		5	1.41421	Doc (OECD & lit exp.)	1	B(QSAR)	1	B(QSAR) V(OECD exp.)	0	(M1)	(P3-4)	(P3-4)	B	10.2203	QSAR (SPARC)	-1.55027	OECD exp.	-2.88227		OECD exp	5	0.0966447	1.93272	5	1.32849e+08	OECD exp.	5	5.36935e+07	0.878722	8	1	B(QSAR)	-	-	-	12.4502	EPIwin Exp.	0.00889029	OECD exp.
p103-09-3	CCCCC(COC(=O)C)CC	2-ethylhexyl acetate	parent_chemical	172.269	organic	neutral	Transient	Transient	0.57735	exp	3	0.57735	Doc (OECD & lit exp.)	1	B(exp)	1	B(exp) V(QSAR avg.)	0	(M2-3)	(P1-2)	(P1-2)	N	N	-	2.35	OECD exp.	3.42208	0.399837	Avg. QSAR	2	3.42208	0.399837	5	167.062	QSAR avg	3	167.062	0.753144	8	1	B(exp)	4	Hydrowin	-	31	OECD exp.	0.0495661	QSAR avg.
p103-11-7	CCCCC(COC(=O)C=C)CC	2-ethylhexyl acrylate	parent_chemical	184.28	organic	neutral	Transient	Transient	0.57735	exp	2	0.57735	Doc (OECD & lit exp.)	1	B(QSAR) H(OECD exp.)	1	B(QSAR) V(EPI exp.) H(OECD exp.)	0	(M2-3)	(P1-2)	(P1-2)	N	N	-	3.1	OECD exp.	3.95582	0.136965	Avg. QSAR	2	3.95582	0.136965	5	100	EPI exp.	3	53.1575	0.769271	8	1	B(QSAR)	1	OECD exp.	-	24	OECD exp.	0.0176665	EPI exp.
p103-23-1	CCCCCCCCOC(=O)CCCCC(=O)OCCCCCCCC	bis(2-ethylhexyl) adipate	parent_chemical	370.577	organic	neutral	Transient	Transient	0.57735	exp	1	0.57735	Doc (OECD & lit exp.)	1	B(exp)	1	B(exp)	0	(M1)	(P1-2)	(P1-2)	N	N	-	4.687	OECD exp.	7.76876	0.583393	Avg. QSAR	1	7.76876	0.583393	5	10	EPI exp.	2	0.382147	1.90409	8	1	B(exp)	4	OECD exp.	-	0.000113305	EPIwin Exp.	1.77483e-05	EPI exp.
p103-24-2	CCCCC(COC(=O)CCCCCCCC(=O)OCC(CCCC)CC)CC	bis(2-ethylhexyl) azelate	parent_chemical	412.658	organic	neutral	Transient	Transient	0		1	0	Swater (Avg. QSAR)	1	B(QSAR)	1	B(QSAR) V(QSAR avg.)	0	(M1)	(P1-2)	(P1-2)	N	N	-	-	-	8.79604	0.59498	Avg. QSAR	1	8.79604	0.59498	5	0.08599	QSAR avg	1	0.08599	1.68891	8	1	B(QSAR)	4	OECD exp.	-	0.000252171	QSAR avg.	0.00268744	QSAR avg.
p103-26-4	COC(=O)/C=C/c1ccccc1	methyl cinnamate	parent_chemical	162.189	organic	neutral	Transient	Transient	0		3	0	Swater (OECD & lit exp.)	1	B(QSAR)	1	B(QSAR)	0	(M2-3)	(P1-2)	(P1-2)	N	N	-	-	-	2.40823	0.158244	Avg. QSAR	3	2.40823	0.158244	5	299	OECD exp.	3	571.681	0.595462	8	1	B(QSAR)	4	Hydrowin	-	0.73	OECD exp.	0.000159826	OECD exp.
p103-34-4	O1CCN(CC1)SSN1CCOCC1	di(morpholin-4-yl) disulphide	parent_chemical	236.357	organic	neutral	Transient	Transient	1.35401	exp	3	1.1547	Swater (OECD & lit exp.)	1	H(OECD exp.)	1	H(OECD exp.)	0.707107	(M4-5)	(P1-2)	(P1-2)	N	N	-	-	-	2.67		OECD exp	5	-0.219484	0.749903	5	215	OECD exp.	5	309246	1.14956	8	4	B(QSAR)	1	OECD exp.	-	0.004	OECD exp.	1.77485e-06	OECD exp.
p103-45-7	CC(=O)OCCc1ccccc1	phenethyl acetate	parent_chemical	164.205	organic	neutral	Unstable MOC	Unstable MOC	0.57735	exp	4	0.57735	Doc (OECD & lit exp.)	1	B(exp)	1	B(exp) V(QSAR avg.)	0	(M2-3)	(P1-2)	(P3-4)	N	N	-	1.91	OECD exp.	2.28958	0.375249	Avg. QSAR	3	2.28958	0.375249	5	963	OECD exp.	4	1205.89	1.08902	8	1	B(exp)	4	Hydrowin	-	4.18562	EPIwin Exp.	0.000579416	QSAR avg.
p103-49-1,h10591-85-2	N(Cc1ccccc1)Cc1ccccc1	dibenzylamine	hydrolysis_product,parent_chemical	197.282	organic	ionizable	5	5	1.82574		5	1.1547	Swater (OECD & lit exp.)	4	B(QSAR)	4	B(QSAR) V(QSAR avg.)	1.41421	(M2-3)	(P3-4)	(P3-4)	B	7.7	Exp (OECD)	-	-	1.57631	1.63788	Avg. QSAR	5	0.0962798	0.937772	5	2.03021e+06	OECD exp.	5	2.62246e+06	1.72278	8	4	B(QSAR)	-	-	-	0.10544	EPIwin Exp.	4.4666e-06	QSAR avg.
p103-50-4	O(Cc1ccccc1)Cc1ccccc1	dibenzyl ether	parent_chemical	198.266	organic	neutral	4	Transient	1.58114		2	0.707107	Swater (EPI exp.)	4	B(QSAR)	2	V(EPI exp.)	1.41421	(M2-3)	(P3-4)	(P3-4)	N	N	-	-	-	3.48734	0.18694	Avg. QSAR	2	3.48734	0.18694	5	40	EPI exp.	3	59.5254	0.768496	8	4	B(QSAR)	-	-	-	0.13699	OECD exp.	0.000274812	EPI exp.
p103-60-6	CC(C(=O)OCCOc1ccccc1)C	2-phenoxyethyl isobutyrate	parent_chemical	208.259	organic	neutral	Transient	Transient	0	exp	3	0	Swater (OECD & lit exp.)	1	B(exp)	1	B(exp)	0	(M2-3)	(P3-4)	(P3-4)	N	N	-	-	-	2.98512	0.317647	Avg. QSAR	3	2.98512	0.317647	5	196	OECD exp.	3	259.852	0.777427	8	1	B(exp)	4	Hydrowin	-	0.77	OECD exp.	0.000330227	OECD exp.
p103-67-3,p618-36-0	CNCc1ccccc1	benzyl(methyl)amine:DL-α-methylbenzylamine	parent_chemical	121.183	organic	ionizable	3	3	0.707107		5	0	Swater (EPI exp.)	2	B(QSAR)	2	B(QSAR)	0.707107	(M2-3)	(P3-4)	(P3-4)	B	9.90417	QSAR (SPARC)	-	-	0.0406738	1.62318	Avg. QSAR	5	-2.32099	1.91704	5	1000000	EPI exp.	5	1.59699e+10	1.28829	8	2	B(QSAR)	-	-	-	143.489	QSAR avg.	7.41925e-05	QSAR avg.
p103-69-5,h85-98-3	CCNc1ccccc1	N-ethylaniline	hydrolysis_product,parent_chemical	121.183	organic	ionizable	4.5	Unstable MOC	1.35401		4	1.1547	Swater (EPI exp.)	3	B(QSAR)	1	V(EPI exp.)	0.707107	(M2-3)	(P3-4)	(P3-4)	B	5.12	Exp (OECD)	-	-	1.10825		OECD exp	5	1.06056	0.297988	5	2410	EPI exp.	5	35982.2	0.697237	8	3	B(QSAR)	-	-	-	27.1932	EPIwin Exp.	0.000399949	EPI exp.
p103-71-9	O=C=Nc1ccccc1	phenyl isocyanate	parent_chemical	119.124	organic	neutral	Unstable MOC	Unstable MOC	1		5	0.707107	Swater (Avg. QSAR)	1	H(LHC QSAR)	1	V(QSAR avg.) H(LHC QSAR)	0.707107	(M4-5)	(P3-4)	(P1-2)	N	N	-	-	-	1.73555	0.656553	Avg. QSAR	4	1.73555	0.656553	5	14421.9	QSAR avg	5	14421.9	2.36721	8	2	B(QSAR)	1	LHC QSAR	-	343	OECD exp.	0.00482785	QSAR avg.
p103-73-1	CCOc1ccccc1	phenetole	parent_chemical	122.168	organic	neutral	Unstable MOC	Unstable MOC	0.57735		4	0.57735	Doc (PP-LFER)	1	B(QSAR)	1	B(QSAR) V(Lit exp.)	0	(M2-3)	(P3-4)	(P3-4)	N	N	-	1.82428	PP-LFER	2.51	0	lit exp.	3	2.47042	0.303262	5	569	EPI exp.	4	1021.96	0.797393	8	1	B(QSAR)	-	-	-	204	Lit. Exp.	0.0234423	Lit exp.
p103-74-2	OCCc1ccccn1	2-(2-pyridyl)ethanol	parent_chemical	123.156	organic	ionizable	3	3	0.707107		5	0	Swater (Avg. QSAR)	2	B(QSAR)	2	B(QSAR)	0.707107	(M4-5)	(P1-2)	(P1-2)	B	5.47414	QSAR (SPARC)	-	-	-0.207678	0.76438	Avg. QSAR	5	-0.803069	0.789044	5	1.0241e+07	QSAR avg	5	1.0241e+07	1.38478	8	2	B(QSAR)	-	-	-	0.809163	QSAR avg.	2.98498e-08	QSAR avg.
p103-82-2,h101-41-7,h101-97-3,h102-20-5,h140-29-4,h54639-48-4,h92096-37-2,h104146-10-3,h400827-68-1	OC(=O)Cc1ccccc1	phenylacetic acid	hydrolysis_product,parent_chemical	136.151	organic	ionizable	Unstable MOC	Unstable MOC	0		5	0	Swater (EPI exp.)	1	B(QSAR)	1	B(QSAR)	0	(M4-5)	(P1-2)	(P1-2)	A	4.31	Exp (Dean, J.A. (ed.). Lange's Handbook of Chemistry. 13 ed. New York, NY: McGraw-Hill Book Co., 1985., p. 5-53)	-	-	-4.28		lit exp.	5	-2.45397	1.9635	5	16600	EPI exp.	5	2.52017e+09	0.944454	8	1	B(QSAR)	-	-	-	0.5054	OECD exp.	1.67668e-06	EPI exp.
p103-83-3	CN(Cc1ccccc1)C	benzyldimethylamine	parent_chemical	135.21	organic	ionizable	5	3	0.707107		5	0	Swater (EPI exp.)	3	B(QSAR)	2	V(QSAR avg.)	0.707107	(M2-3)	(P3-4)	(P3-4)	B	8.91	Exp (OECD)	-	-	-2.93001		lit exp.	5	-1.77506	1.38418	5	12000	EPI exp.	5	6.68175e+08	1.2761	8	3	B(QSAR)	-	-	-	317	OECD exp.	0.000164276	QSAR avg.
p103-90-2	CC(=O)Nc1ccc(cc1)O	paracetamol	parent_chemical	151.166	organic	ionizable	Unstable MOC	Unstable MOC	0		5	0	Doc (PP-LFER)	1	B(QSAR)	1	B(QSAR)	0	(M4-5)	(P1-2)	(P1-2)	amph	amphoprotic	-	-0.008	PP-LFER	0.210209	0.0965483	Avg. QSAR	5	0.210209	0.0965483	5	14000	EPI exp.	5	55123.7	1.47327	8	1	B(QSAR)	-	-	-	0.0083657	OECD exp.	1.01138e-11	PP-LFER
p103-95-7	O=CC(Cc1ccc(cc1)C(C)C)C	3-p-cumenyl-2-methylpropionaldehyde	parent_chemical	190.287	organic	neutral	Transient	Transient	0.912871		2	0.57735	Doc (OECD & lit exp.)	2	B(QSAR)	1	V(QSAR avg.)	0.707107	(M2-3)	(P1-2)	(P1-2)	N	N	-	3.05	OECD exp.	3.70812	0.119175	Avg. QSAR	2	3.70812	0.119175	5	66	OECD exp.	3	52.1767	0.924425	8	2	B(QSAR)	-	-	-	1513.53	QSAR avg.	0.00063426	QSAR avg.
p104-12-1	O=C=Nc1ccc(cc1)Cl	4-chlorophenyl isocyanate	parent_chemical	153.569	organic	neutral	Unstable MOC	Unstable MOC	1		4	0.707107	Swater (Avg. QSAR)	1	H(LHC QSAR)	1	V(QSAR avg.) H(LHC QSAR)	0.707107	(M2-3)	(P3-4)	(P3-4)	N	N	-	-	-	2.40726	0.676772	Avg. QSAR	3	2.40726	0.676772	5	3790.09	QSAR avg	4	3790.09	2.42972	8	3	B(QSAR)	1	LHC QSAR	-	25.8602	EPIwin Exp.	0.00356508	QSAR avg.
p104-15-4,s69477-29-8,s83949-32-0,s287930-71-6,s346709-25-9,h98-59-9,h4137-56-8,h10429-07-9	Cc1ccc(cc1)S(=O)(=O)O	toluene-4-sulphonic acid:Ethanol, 2,2',2'',2'''-[(4,8-di-1-piperidinylpyrimido[5,4-d]pyrimidine-2,6-diyl)dinitrilo]tetrakis-, tetrakis(4-methylbenzenesulfonate) (salt):4-phenylpiperidine-4-carboxylic acid, compound with toluene-p-sulphonic acid:5-{5-chloro-3-[4-(methylsulfonyl)phenyl]pyridin-2-yl}-2-methylpyridinium 4-methylbenzenesulfonate_x000D_ :Reaction mass of pyrimido[5,4-g]pteridine-2,4,6,…	hydrolysis_product,parent_chemical,salt_or_mixture_component	172.204	organic	ionizable	5	5	0.707107		5	0	Swater (EPI exp.)	3	B(QSAR)	3	B(QSAR)	0.707107	(M4-5)	(P1-2)	(P3-4)	A	2.96	Exp (OECD)	-	-	-8		OECD exp	5	-2.72143	3.34656	4	620000	EPI exp.	5	2.20521e+12	1.9867	6	3	B(QSAR)	-	-	-	0.00038657	QSAR avg.	1.13687e-07	QSAR avg.
p104-23-4	Nc1ccc(cc1)N=Nc1ccc(cc1)S(=O)(=O)O	4'-aminoazobenzene-4-sulphonic acid	parent_chemical	277.303	organic	ionizable	5	5	0		5	0	Swater (Avg. QSAR)	4	B(QSAR)	4	B(QSAR) V(QSAR avg.)	0	(M4-5)	(P3-4)	(P1-2)	amph	amphoprotic	-	-	-	0.330511	0.209838	Avg. QSAR	5	0.330511	0.209838	4	97699.6	QSAR avg	5	97699.6	2.07222	6	4	B(QSAR)	-	-	-	1.87953e-09	QSAR avg.	9.93739e-14	QSAR avg.
p104-38-1	OCCOc1ccc(cc1)OCCO	2,2'-p-phenylenedioxydiethanol	parent_chemical	198.22	organic	neutral	Unstable MOC	Unstable MOC	0		5	0	Swater (OECD & lit exp.)	1	B(QSAR)	1	B(QSAR)	0	(M4-5)	(P3-4)	(P1-2)	N	N	-	-	-	0.653762	0.3806	Avg. QSAR	5	0.653762	0.3806	5	13100	OECD exp.	5	24069.9	1.11574	8	1	B(QSAR)	-	-	-	4.91834e-05	QSAR avg.	7.06738e-10	QSAR avg.
p104-54-1	OC/C=C/c1ccccc1	cinnamyl alcohol	parent_chemical	134.179	organic	neutral	Unstable MOC	Unstable MOC	0		4	0	Swater (Avg. QSAR)	1	B(QSAR)	1	B(QSAR)	0	(M4-5)	(P1-2)	(P1-2)	N	N	-	-	-	1.88238	0.173427	Avg. QSAR	4	1.88238	0.173427	5	3867.49	QSAR avg	4	3867.49	0.641612	8	1	B(QSAR)	-	-	-	3.1992	EPIwin Exp.	5.26873e-06	QSAR avg.
p104-55-2	O=C/C=C/c1ccccc1	cinnamaldehyde	parent_chemical	132.163	organic	neutral	Unstable MOC	Unstable MOC	0	exp	4	0	Swater (EPI exp.)	1	B(exp)	1	B(exp)	0	(M4-5)	(P1-2)	(P1-2)	N	N	-	-	-	1.95084	0.081572	Avg. QSAR	4	1.95084	0.081572	5	1420	EPI exp.	4	1774.3	0.654081	8	1	B(exp)	-	-	-	3.8437	OECD exp.	7.46653e-05	QSAR avg.
p104-61-0	CCCCCC1CCC(=O)O1	nonan-4-olide	parent_chemical	156.226	organic	neutral	Unstable MOC	Unstable MOC	0.57735	exp	4	0.57735	Swater (OECD & lit exp.)	1	B(exp)	1	B(exp) V(QSAR avg.)	0	(M2-3)	(P1-2)	(P1-2)	N	N	-	-	-	2.32262	0.481643	Avg. QSAR	3	2.32262	0.481643	5	2180	OECD exp.	4	1549.06	1.47673	8	1	B(exp)	3	LHC QSAR	-	2.88836	QSAR avg.	0.00808149	QSAR avg.
p104-66-5	C(Oc1ccccc1)COc1ccccc1	1,2-diphenoxyethane	parent_chemical	214.266	organic	neutral	Transient	Transient	0.707107		2	0	Doc (OECD & lit exp.)	2	B(QSAR)	1	V(QSAR avg.)	0.707107	(M2-3)	(P3-4)	(P3-4)	N	N	-	3.05	OECD exp.	3.8353	0.506377	Avg. QSAR	2	3.8353	0.506377	5	28.1275	QSAR avg	2	28.1275	0.884162	8	2	B(QSAR)	-	-	-	0.000433	OECD exp.	0.00132178	QSAR avg.
p104-67-6	CCCCCCCC1=CCC(=O)O1	undecan-4-olide	parent_chemical	182.264	organic	neutral	Transient	Transient	0	exp	3	0	Swater (OECD & lit exp.)	1	B(exp) H(LHC QSAR)	1	B(exp) V(QSAR avg.) H(LHC QSAR)	0	(M2-3)	(P1-2)	(P1-2)	N	N	-	-	-	3.20676	0.462038	Avg. QSAR	3	3.20676	0.462038	5	158	OECD exp.	3	121.583	0.819098	8	1	B(exp)	1	LHC QSAR	-	0.356312	QSAR avg.	0.106572	QSAR avg.
p104-68-7	OCCOCCOc1ccccc1	2-(2-phenoxyethoxy)ethanol	parent_chemical	182.221	organic	neutral	Unstable MOC	Unstable MOC	0.57735	exp	5	0.57735	Swater (OECD & lit exp.)	1	B(exp)	1	B(exp)	0	(M4-5)	(P3-4)	(P3-4)	N	N	-	-	-	1.35		OECD exp	4	1.27757	0.469041	5	35000	OECD exp.	5	16761.2	0.896086	8	1	B(exp)	-	-	-	0.12	OECD exp.	2.52165e-07	OECD exp.
p104-75-6,h93820-33-8	CCCCC(CN)CC	2-ethylhexylamine	hydrolysis_product,parent_chemical	129.247	organic	ionizable	Unstable MOC	Unstable MOC	1		5	1	Doc (OECD & lit exp.)	1	B(QSAR)	1	B(QSAR) V(OECD exp.)	0	(M2-3)	(P1-2)	(P1-2)	B	10.3983	QSAR (SPARC)	-3.21077	OECD exp.	-3.57827		OECD exp	5	-1.60887	2.44466	5	2500	EPI exp.	5	6.1443e+09	1.22648	8	1	B(QSAR)	-	-	-	186.62	EPIwin Exp.	0.00389494	OECD exp.
p104-76-7	CCCCCC(CC)O	2-ethylhexan-1-ol	parent_chemical	130.232	organic	neutral	Transient	Transient	0.5	exp	3	0.5	Swater (OECD & lit exp.)	1	B(exp)	1	B(exp) V(OECD exp.)	0	(M2-3)	(P1-2)	(P1-2)	N	N	-	-	-	2.9		OECD exp	3	2.77232	0.0946889	5	900	OECD exp.	4	1126.81	0.318634	8	1	B(exp)	-	-	-	30	OECD exp.	0.00175214	OECD exp.
p104-78-9,h106595-73-7	NCCCN(CC)CC	3-aminopropyldiethylamine	hydrolysis_product,parent_chemical	130.235	organic	ionizable	Unstable MOC	Unstable MOC	0		5	0	Swater (Avg. QSAR)	1	B(exp)	1	B(exp)	0	(M2-3)	(P3-4)	(P3-4)	B	10.1969	QSAR (SPARC)	-	-	-1.90339	2.948	Avg. QSAR	5	-4.38215	1.83457	5	9.2039e+11	QSAR avg	5	9.2039e+11	1.72378	8	1	B(exp)	-	-	-	171.757	QSAR avg.	1.18408e-06	QSAR avg.
p104-83-6,h13940-94-8	ClCc1ccc(cc1)Cl	α,4-dichlorotoluene	hydrolysis_product,parent_chemical	161.032	organic	neutral	Transient	Transient	1		3	0.707107	Swater (Avg. QSAR)	1	H(LHC QSAR)	1	V(QSAR avg.) H(LHC QSAR)	0.707107	(M2-3)	(P3-4)	(P3-4)	N	N	-	-	-	3.23077	0.20501	Avg. QSAR	2	3.23077	0.20501	5	95.4435	QSAR avg	3	95.4435	0.447686	8	4	B(QSAR)	1	LHC QSAR	-	14.4263	QSAR avg.	0.0276268	QSAR avg.
p104-88-1,h13940-94-8,h82203-23-4	O=Cc1ccc(cc1)Cl	4-chlorobenzaldehyde	hydrolysis_product,parent_chemical	140.57	organic	neutral	1	Transient	0.866025		3	0.5	Swater (OECD & lit exp.)	2	B(QSAR)	1	V(QSAR avg.)	0.707107	(M2-3)	(P3-4)	(P3-4)	N	N	-	-	-	2.21		OECD exp	4	2.19273	0.176571	5	919	OECD exp.	4	1198.99	0.653802	8	2	B(QSAR)	-	-	-	17.9758	QSAR avg.	0.000565545	QSAR avg.
p104-90-5	CCc1ccc(nc1)C	5-ethyl-2-methylpyridine	parent_chemical	121.183	organic	ionizable	3	Unstable MOC	0		5	0	Swater (EPI exp.)	2	B(QSAR)	1	V(EPI exp.)	0	(M2-3)	(P1-2)	(P1-2)	B	6.20689	QSAR (SPARC)	-	-	1.31366	1.16336	Avg. QSAR	5	0.429828	0.872579	5	12000	EPI exp.	5	907659	1.14662	8	2	B(QSAR)	-	-	-	190.619	EPIwin Exp.	0.000776998	EPI exp.
p104-92-7	COc1ccc(cc1)Br	4-bromoanisole	parent_chemical	187.042	organic	neutral	1	Transient	0		3	0	Swater (Avg. QSAR)	2	B(QSAR)	1	V(QSAR avg.)	0	(M2-3)	(P1-2)	(P1-2)	N	N	-	-	-	2.83874	0.248234	Avg. QSAR	3	2.83874	0.248234	5	310.806	QSAR avg	3	310.806	0.555979	8	2	B(QSAR)	-	-	-	27.0599	EPIwin Exp.	0.0322285	QSAR avg.
p104-93-8	COc1ccc(cc1)C	4-methylanisole	parent_chemical	122.168	organic	neutral	Transient	Transient	0		3	0	Doc (OECD & lit exp.)	1	B(QSAR)	1	B(QSAR) V(QSAR avg.)	0	(M2-3)	(P1-2)	(P1-2)	N	N	-	2.45	OECD exp.	2.66		lit exp.	3	2.533	0.210791	5	559	OECD exp.	3	719.418	0.739408	8	1	B(QSAR)	-	-	-	206.074	QSAR avg.	0.0779424	QSAR avg.
p105-05-5	CCC(c1ccccc1)C	1,4-diethylbenzene	parent_chemical	134.223	organic	neutral	Transient	Transient	0.707107		2	0	Swater (EPI exp.)	2	B(QSAR)	1	V(EPI exp.)	0.707107	(M2-3)	(P1-2)	(P1-2)	N	N	-	-	-	3.78677	0.207691	Avg. QSAR	2	3.78677	0.207691	5	17.6	EPI exp.	2	41.6453	0.918136	8	2	B(QSAR)	-	-	-	140.401	OECD exp.	0.719745	EPI exp.
p105-08-8,h83447-96-5	OCC1CCC(CC1)CO	cyclohex-1,4-ylenedimethanol	hydrolysis_product,parent_chemical	144.215	organic	neutral	Unstable MOC	Unstable MOC	0		5	0	Swater (Avg. QSAR)	1	B(QSAR)	1	B(QSAR)	0	(M4-5)	(P1-2)	(P1-2)	N	N	-	-	-	0.819748	0.407188	Avg. QSAR	5	0.819748	0.407188	5	44272.5	QSAR avg	5	44272.5	1.09636	8	1	B(QSAR)	-	-	-	0.0410564	EPIwin Exp.	4.31133e-06	QSAR avg.
p105-13-5,h104146-10-3,h689294-28-8	OCc1ccc(cc1)OC	4-methoxybenzyl alcohol	hydrolysis_product,parent_chemical	138.167	organic	neutral	Unstable MOC	Unstable MOC	2.08167		4	2.08167	Swater (EPI exp.)	1	B(QSAR)	1	B(QSAR)	0	(M2-3)	(P1-2)	(P1-2)	N	N	-	-	-	6.76		OECD exp	4	1.26784	0.191057	5	2000	EPI exp.	5	14036.6	0.663761	8	1	B(QSAR)	-	-	-	0.297735	QSAR avg.	1.372e-06	QSAR avg.
p105-34-0	COC(=O)CC#N	methyl cyanoacetate	parent_chemical	99.0897	organic	ionizable	Unstable MOC	Unstable MOC	0		5	0	Swater (Avg. QSAR)	1	B(exp) H(Hydrowin)	1	B(exp) H(Hydrowin)	0	(M4-5)	(P1-2)	(P1-2)	A	10.5005	QSAR (SPARC)	-	-	-0.512079	0.448262	Avg. QSAR	5	-0.559761	0.453011	5	496519	QSAR avg	5	496519	1.20978	8	1	B(exp)	1	Hydrowin	-	18.354	OECD exp.	3.32504e-06	QSAR avg.
p105-39-5,h51076-95-0	CCOC(=O)CCl	ethyl chloroacetate	hydrolysis_product,parent_chemical	122.552	organic	neutral	Unstable MOC	Unstable MOC	0.57735	exp	4	0.57735	Doc (OECD & lit exp.)	1	B(QSAR) H(OECD exp.)	1	B(QSAR) V(EPI exp.) H(OECD exp.)	0	(M4-5)	(P1-2)	(P1-2)	N	N	-	1.074	OECD exp.	0.995615	0.169301	Avg. QSAR	5	0.995615	0.169301	5	19400	EPI exp.	5	18123.9	0.239492	8	1	B(QSAR)	1	OECD exp.	-	647.71	OECD exp.	0.00166032	EPI exp.
p105-45-3,h14205-39-1	COC(=O)CC(=O)C	methyl acetoacetate	hydrolysis_product,parent_chemical	116.117	organic	ionizable	Unstable MOC	Unstable MOC	0		5	0	Doc (OECD & lit exp.)	1	B(QSAR)	1	B(QSAR)	0	(M4-5)	(P1-2)	(P1-2)	A	10.6373	QSAR (SPARC)	-0.0750843	OECD exp.	-0.216669	0.288965	Avg. QSAR	5	-0.252703	0.311718	5	500000	EPI exp.	5	386308	0.820973	8	1	B(QSAR)	3	LHC QSAR	-	35.4	OECD exp.	1.11642e-05	EPI exp.
p105-53-3,h14064-10-9	CCOC(=O)CC(=O)OCC	diethyl malonate	hydrolysis_product,parent_chemical	160.171	organic	ionizable	Unstable MOC	Unstable MOC	0		5	0	Swater (EPI exp.)	1	B(QSAR) H(Hydrowin)	1	B(QSAR) H(Hydrowin)	0	(M4-5)	(P1-2)	(P1-2)	FALSE	-	-	-	-	0.924039	0.224461	Avg. QSAR	5	0.924039	0.224461	5	23200	EPI exp.	5	22626.8	0.490873	8	1	B(QSAR)	1	Hydrowin	-	36	OECD exp.	8.58787e-05	EPI exp.
p105-55-5	CCNC(=S)NCC	1,3-diethyl-2-thiourea	parent_chemical	132.229	organic	ionizable	Unstable MOC	Unstable MOC	0		5	0	Swater (OECD & lit exp.)	1	B(QSAR)	1	B(QSAR)	0	(M2-3)	(P3-4)	(P3-4)	amph	amphoprotic	-	-	-	0.57		OECD exp	5	0.515874	0.581465	5	42000	OECD exp.	5	71871.6	1.54345	8	1	B(QSAR)	2	OECD exp.	-	4.66651	QSAR avg.	2.74149e-05	QSAR avg.
p105-56-6	CCOC(=O)CC#N	ethyl cyanoacetate	parent_chemical	113.117	organic	ionizable	Unstable MOC	Unstable MOC	0		5	0	Swater (EPI exp.)	1	B(QSAR) H(Hydrowin)	1	B(QSAR) H(Hydrowin)	0	(M4-5)	(P1-2)	(P1-2)	A	10.5005	QSAR (SPARC)	-	-	-0.0726044	0.461058	Avg. QSAR	5	-0.120286	0.448601	5	20000	EPI exp.	5	237893	1.24389	8	1	B(QSAR)	1	Hydrowin	-	0.000517	OECD exp.	1.18185e-05	EPI exp.
p105-58-8	CCOC(=O)OCC	diethyl carbonate	parent_chemical	118.133	organic	neutral	Unstable MOC	Unstable MOC	0.57735		5	0.57735	Doc (PP-LFER)	1	B(exp)	1	B(exp) V(Lit exp.)	0	(M4-5)	(P1-2)	(P1-2)	N	N	-	0.65908	PP-LFER	1.21829	0.333288	Avg. QSAR	4	1.21829	0.333288	5	18800	EPI exp.	5	18354	0.767102	8	1	B(exp)	4	LHC QSAR	-	1469.6	OECD exp.	0.00223872	Lit exp.
p105-59-9,h83016-70-0	OCCN(CCO)C	2,2'-methyliminodiethanol	hydrolysis_product,parent_chemical	119.165	organic	ionizable	Unstable MOC	Unstable MOC	0		5	0	Doc (OECD & lit exp.)	1	B(QSAR)	1	B(QSAR)	0	(M4-5)	(P3-4)	(P3-4)	B	8.52	Exp (OECD)	-3.67497	OECD exp.	-2.60852	1.2619	Avg. QSAR	5	-4.41653	1.79479	5	1000000	EPI exp.	5	4.18512e+10	1.05594	8	1	B(QSAR)	-	-	-	0.0285	OECD exp.	1.28409e-09	EPI exp.
p105-60-2,h7381-13-7	O=C1CCCCCN1	ε-caprolactam	hydrolysis_product,parent_chemical	113.16	organic	neutral	Unstable MOC	Unstable MOC	0.57735	exp	4	0.57735	Doc (OECD & lit exp.)	1	B(exp)	1	B(exp)	0	(M4-5)	(P1-2)	(P1-2)	N	N	-	1.76	OECD exp.	0.26254	0.37756	Avg. QSAR	5	0.26254	0.37756	5	772000	EPI exp.	5	110579	1.18806	8	1	B(exp)	-	-	-	0.25	OECD exp.	5.2266e-07	QSAR avg.
p105-67-9	Cc1ccc(c(c1)C)O	2,4-xylenol	parent_chemical	122.168	organic	ionizable	2	2	0.912871		4	0.57735	Doc (PP-LFER)	2	B(QSAR)	2	B(QSAR)	0.707107	(M4-5)	(P1-2)	(P1-2)	A	10.6729	QSAR (SPARC)	1.47136	PP-LFER	2.21636	0	lit exp.	3	2.4084	0.201954	5	7870	EPI exp.	4	4180.76	0.602949	8	2	B(QSAR)	-	-	-	13	Lit. Exp.	3.89045e-05	Lit exp.
p105-74-8	CCCCCCCCCCCC(=O)OOC(=O)CCCCCCCCCCC	dilauroyl peroxide	parent_chemical	398.631	organic	neutral	Transient	Transient	0	exp	1	0	Doc (OECD & lit exp.)	1	B(exp) H(Hydrowin)	1	B(exp) V(QSAR avg.) H(Hydrowin)	0	(M1)	(P1-2)	(P1-2)	N	N	-	6.72	OECD exp.	9.33977	0.889004	Avg. QSAR	1	9.33977	0.889004	5	0.0146542	QSAR avg	1	0.0146542	2.21659	8	1	B(exp)	1	Hydrowin	-	0.000132815	QSAR avg.	0.536056	QSAR avg.
p105-75-9	CCCCOC(=O)/C=C/C(=O)OCCCC	dibutyl fumarate	parent_chemical	228.29	organic	neutral	Transient	Transient	0.57735	exp	2	0.57735	Swater (OECD & lit exp.)	1	B(exp)	1	B(exp) V(OECD exp.)	0	(M2-3)	(P1-2)	(P1-2)	N	N	-	-	-	3.61113	0.385019	Avg. QSAR	2	3.61113	0.385019	5	11.09	OECD exp.	3	164.156	0.734848	8	1	B(exp)	4	Hydrowin	-	0.323	OECD exp.	0.00268369	OECD exp.
p105-76-0	CCCCOC(=O)/C=C\C(=O)OCCCC	dibutyl maleate	parent_chemical	228.29	organic	neutral	Transient	Transient	0.57735		3	0.57735	Swater (OECD & lit exp.)	1	B(QSAR)	1	B(QSAR)	0	(M2-3)	(P1-2)	(P1-2)	N	N	-	-	-	3.61113	0.385019	Avg. QSAR	2	3.61113	0.385019	5	170	OECD exp.	3	164.156	0.734848	8	1	B(QSAR)	4	OECD exp.	-	0.0830459	EPIwin Exp.	1.52946e-05	EPI exp.
p105-83-9	NCCCN(CCCN)C	N,N-bis(3-aminopropyl)methylamine	parent_chemical	145.249	organic	ionizable	2	2	0.57735		4	0.57735	Doc (OECD & lit exp.)	2	B(QSAR)	2	B(QSAR)	0	(M2-3)	(P3-4)	(P3-4)	B	polyprotic	-	1.17627	OECD exp.	-4.28913	3.96715	Avg. QSAR	5	-4.28913	3.96715	5	1.08838e+07	QSAR avg	5	1.08838e+07	2.20075	8	2	B(QSAR)	-	-	-	4.6	OECD exp.	5.52557e-11	QSAR avg.
p105-87-3	C/C(=C\COC(=O)C)/CCC=C(C)C	geranyl acetate	parent_chemical	196.291	organic	neutral	Transient	Transient	0.5		2	0.5	Doc (OECD & lit exp.)	1	B(QSAR)	1	B(QSAR)	0	(M2-3)	(P1-2)	(P1-2)	N	N	-	3.06	OECD exp.	3.80417	0.669457	Avg. QSAR	2	3.80417	0.669457	5	29	OECD exp.	3	85.5564	0.864376	8	1	B(QSAR)	3	OECD exp.	-	4.3989	EPIwin Exp.	0.000102276	PP-LFER
p105-95-3	O=C1CCCCCCCCCCCC(=O)OCCO1	1,4-dioxacycloheptadecane-5,17-dione	parent_chemical	270.371	organic	neutral	Transient	Transient	0.447214	exp	2	0.447214	Doc (OECD & lit exp.)	1	B(exp)	1	B(exp)	0	(M2-3)	(P1-2)	(P1-2)	N	N	-	3.83	OECD exp.	4.3		OECD exp	2	3.54496	0.957779	5	17.2	OECD exp.	3	467.319	2.16315	8	1	B(exp)	-	-	-	3.93825e-05	QSAR avg.	4.47254e-05	QSAR avg.
p105-99-7	CCCCOC(=O)CCCCC(=O)OCCCC	dibutyl adipate	parent_chemical	258.36	organic	neutral	Transient	Transient	0.707107		3	0.707107	Swater (Avg. QSAR)	1	B(exp)	1	B(exp)	0	(M2-3)	(P1-2)	(P1-2)	N	N	-	-	-	4.07239	0.497013	Avg. QSAR	2	4.07239	0.497013	5	140.553	QSAR avg	3	140.553	1.61822	8	1	B(exp)	4	OECD exp.	-	0.021	OECD exp.	0.000175136	QSAR avg.
p106-02-5	O=C1CCCCCCCCCCCCCCO1	pentadecan-15-olide	parent_chemical	240.388	organic	neutral	Transient	Transient	0.707107		2	0.707107	Swater (Avg. QSAR)	1	B(exp)	1	B(exp) V(QSAR avg.)	0	(M2-3)	(P1-2)	(P1-2)	N	N	-	-	-	5.31373	0.588299	Avg. QSAR	1	5.31373	0.588299	5	8.29989	QSAR avg	2	8.29989	1.661	8	1	B(exp)	-	-	-	0.00515614	QSAR avg.	0.0426816	QSAR avg.
p106-09-2	CCCCCCCCCCCC(=O)NCCNCCO	N-[2-[(2-hydroxyethyl)amino]ethyl]dodecanamide	parent_chemical	286.461	organic	ionizable	Unstable MOC	Unstable MOC	0.707107		5	0.707107	Swater (Avg. QSAR)	1	B(QSAR)	1	B(QSAR)	0	(M2-3)	(P1-2)	(P1-2)	amph	amphoprotic	-	-	-	1.59735	1.38078	Avg. QSAR	4	1.59735	1.38078	5	30459.2	QSAR avg	5	30459.2	1.78125	8	1	B(QSAR)	-	-	-	9.98886e-09	QSAR avg.	6.56028e-13	QSAR avg.
p106-14-9,h123-26-2,h6284-43-1	CCCCCCC(CCCCCCCCCCC(=O)O)O	12-hydroxystearic acid	hydrolysis_product,parent_chemical	300.485	organic	ionizable	Unstable MOC	Unstable MOC	1.1547		5	1.1547	Doc (OECD & lit exp.)	1	B(QSAR)	1	B(QSAR)	0	(M2-3)	(P1-2)	(P1-2)	A	4.7332	QSAR (SPARC)	-2.3118	OECD exp.	4.52779	2.04657	Avg. QSAR	3	2.42107	1.36645	5	1.1516e+06	QSAR avg	5	1.1516e+06	2.55637	8	1	B(QSAR)	-	-	-	2.35431e-07	QSAR avg.	5.19015e-08	QSAR avg.
p106-20-7	CCCCC(CNCC(CCCC)CC)CC	bis(2-ethylhexyl)amine	parent_chemical	241.463	organic	ionizable	Unstable MOC	Unstable MOC	1.81659		5	1.81659	Doc (OECD & lit exp.)	1	B(QSAR)	1	B(QSAR) V(OECD exp.)	0	(M1)	(P3-4)	(P1-2)	B	10.603	QSAR (SPARC)	-1.91968	OECD exp.	0.696988		OECD exp	4	1.62265	2.30631	5	5.61229e+07	OECD exp.	5	4.26988e+06	1.17559	8	1	B(QSAR)	-	-	-	0.38	OECD exp.	0.00264533	OECD exp.
p106-21-8	OCCC(CCCC(C)C)C	3,7-dimethyloctan-1-ol	parent_chemical	158.286	organic	neutral	Transient	Transient	0.5	exp	3	0.5	Doc (OECD & lit exp.)	1	B(exp)	1	B(exp) V(QSAR avg.)	0	(M2-3)	(P1-2)	(P1-2)	N	N	-	2.53	OECD exp.	3.56012	0.32008	Avg. QSAR	2	3.56012	0.32008	5	64	OECD exp.	3	203.096	0.872419	8	1	B(exp)	-	-	-	133.3	EPIwin Exp.	0.00290128	QSAR avg.
p106-22-9,h150-84-5	OCCC(CCC=C(C)C)C	citronellol	hydrolysis_product,parent_chemical	156.27	organic	neutral	Unstable MOC	Unstable MOC	1		4	1	Doc (OECD & lit exp.)	1	B(QSAR)	1	B(QSAR) V(QSAR avg.)	0	(M2-3)	(P1-2)	(P1-2)	N	N	-	1.85	OECD exp.	3.28779	0.371122	Avg. QSAR	2	3.28779	0.371122	5	350.3	QSAR avg	3	350.3	0.657725	8	1	B(QSAR)	-	-	-	5.87853	EPIwin Exp.	0.00117085	QSAR avg.
p106-23-0	O=CCC(CCC=C(C)C)C	citronellal	parent_chemical	154.254	organic	neutral	Transient	Transient	0	exp	3	0	Doc (OECD & lit exp.)	1	B(exp)	1	B(exp) V(QSAR avg.)	0	(M2-3)	(P1-2)	(P1-2)	N	N	-	2.16	OECD exp.	3.16671	0.317107	Avg. QSAR	3	3.16671	0.317107	5	272.836	QSAR avg	3	272.836	0.603985	8	1	B(exp)	-	-	-	26	OECD exp.	0.0155531	QSAR avg.
p106-24-1	OC/C=C(/CCC=C(C)C)\C	geraniol	parent_chemical	154.254	organic	neutral	Unstable MOC	Unstable MOC	0.57735	exp	4	0.57735	Doc (OECD & lit exp.)	1	B(exp)	1	B(exp) V(EPI exp.)	0	(M2-3)	(P1-2)	(P1-2)	N	N	-	1.85	OECD exp.	3.17729	0.49386	Avg. QSAR	3	3.17729	0.49386	5	531	EPI exp.	3	531.674	0.663907	8	1	B(exp)	-	-	-	3.999	EPIwin Exp.	0.000470288	EPI exp.
p106-25-2	OC/C=C(\CCC=C(C)C)/C	nerol	parent_chemical	154.254	organic	neutral	Unstable MOC	Unstable MOC	0.447214		4	0.447214	Doc (PP-LFER)	1	B(exp)	1	B(exp) V(EPI exp.)	0	(M2-3)	(P1-2)	(P1-2)	N	N	-	1.7922	PP-LFER	2.76		OECD exp	3	3.17729	0.49386	5	809.28	OECD exp.	3	531.674	0.663907	8	1	B(exp)	-	-	-	3.999	EPIwin Exp.	0.000470288	EPI exp.
p106-26-3	O=C/C=C(\CCC=C(C)C)/C	(Z)-3,7-dimethylocta-2,6-dienal	parent_chemical	152.238	organic	neutral	Transient	Transient	0		3	0	Doc (PP-LFER)	1	B(exp)	1	B(exp) V(PP-LFER)	0	(M2-3)	(P1-2)	(P1-2)	N	N	-	2.17374	PP-LFER	3.15324	0.330343	Avg. QSAR	3	3.15324	0.330343	5	1340	EPI exp.	3	337.028	1.06146	8	1	B(exp)	-	-	-	20.8985	QSAR avg.	0.000348192	PP-LFER
p106-31-0	CCCC(=O)OC(=O)CCC	butyric anhydride	parent_chemical	158.199	organic	neutral	Unstable MOC	Unstable MOC	0.707107		4	0	Swater (Avg. QSAR)	1	H(Hydrowin)	1	V(QSAR avg.) H(Hydrowin)	0.707107	(M2-3)	(P1-2)	(P1-2)	N	N	-	-	-	1.68993	0.323484	Avg. QSAR	4	1.68993	0.323484	5	3678.54	QSAR avg	4	3678.54	0.581468	8	2	B(QSAR)	1	Hydrowin	-	37.7239	EPIwin Exp.	0.00237093	QSAR avg.
p106-42-3,s1330-20-7	Cc1ccc(cc1)C	p-xylene:xylene	parent_chemical,salt_or_mixture_component	106.168	organic	neutral	Transient	Transient	0	exp	3	0	Doc (OECD & lit exp.)	1	B(exp)	1	B(exp) V(Lit exp.)	0	(M2-3)	(P1-2)	(P1-2)	N	N	-	2.73	OECD exp.	3.15	0	lit exp.	3	3.01603	0.12621	5	156	OECD exp.	3	232.57	0.743777	8	1	B(exp)	-	-	-	1190	Lit. Exp.	0.25704	Lit exp.
p106-43-4,h104-83-6,h13940-94-8	Cc1ccc(cc1)Cl	4-chlorotoluene	hydrolysis_product,parent_chemical	126.586	organic	neutral	1	Transient	0		3	0	Doc (OECD & lit exp.)	2	B(QSAR)	1	V(EPI exp.)	0	(M2-3)	(P3-4)	(P3-4)	N	N	-	2.61	OECD exp.	3.33	0	lit exp.	3	3.12133	0.121346	5	106	EPI exp.	3	168.913	0.638615	8	2	B(QSAR)	-	-	-	379	OECD exp.	0.179118	EPI exp.
p106-44-5,s1319-77-3,h1330-78-5	Cc1ccc(cc1)O	p-cresol:cresol	hydrolysis_product,parent_chemical,salt_or_mixture_component	108.141	organic	ionizable	Unstable MOC	Unstable MOC	0.57735	exp	4	0.57735	Doc (OECD & lit exp.)	1	B(exp)	1	B(exp)	0	(M4-5)	(P1-2)	(P1-2)	A	10.26	Exp (CRC)	1.497	OECD exp.	1.7573	0.015	lit exp.	4	1.88495	0.185597	5	21500	EPI exp.	5	14521.5	0.686799	8	1	B(exp)	-	-	-	14.7	OECD exp.	9.08147e-05	OECD exp.
p106-46-7	Clc1ccc(cc1)Cl	1,4-dichlorobenzene	parent_chemical	147.004	organic	neutral	Transient	Transient	0.57735	exp	3	0.57735	Doc (OECD & lit exp.)	1	B(exp)	1	B(exp) V(OECD exp.)	0	(M2-3)	(P3-4)	(P3-4)	N	N	-	2.44	OECD exp.	3.37		OECD exp	2	3.23758	0.149835	5	81.3	EPI exp.	3	121.742	0.523256	8	1	B(exp)	-	-	-	94	OECD exp.	0.111433	OECD exp.
p106-47-8,h55-56-1,h92-78-4,h101-20-2,h104-12-1	Nc1ccc(cc1)Cl	4-chloroaniline	hydrolysis_product,parent_chemical	127.574	organic	ionizable	4.5	4.5	0.707107		4	0	Doc (PP-LFER)	4	B(QSAR)	4	B(QSAR) V(OECD exp.)	0.707107	(M2-3)	(P3-4)	(P3-4)	B	3.98	Exp (OECD)	1.22691	PP-LFER	1.56385	0.0288675	lit exp.	4	1.57604	0.142316	5	7624.47	OECD exp.	4	5443.66	0.583441	8	4	B(QSAR)	-	-	-	0.0009	OECD exp.	1.18827e-08	OECD exp.
p106-48-9	Oc1ccc(cc1)Cl	4-chlorophenol	parent_chemical	128.559	organic	ionizable	3	3	0.57735		5	0.57735	Doc (PP-LFER)	2	B(QSAR)	2	B(QSAR)	0	(M2-3)	(P1-2)	(P1-2)	A	9.41	Exp (OECD)	0.945551	PP-LFER	1.72398	0.0321455	lit exp.	4	1.47933	0.230314	5	24000	EPI exp.	5	50017.5	0.969725	8	2	B(QSAR)	-	-	-	11.571	OECD exp.	6.91831e-06	Lit exp.
p106-49-0,h622-58-2,h6358-37-8	Cc1ccc(cc1)N	p-toluidine	hydrolysis_product,parent_chemical	107.156	organic	ionizable	5	5	0.707107		5	0	Doc (PP-LFER)	3	B(QSAR)	3	B(QSAR)	0.707107	(M2-3)	(P1-2)	(P1-2)	B	5.08	Exp (OECD)	-0.0728192	PP-LFER	0.275301	0	lit exp.	5	0.724256	0.302701	5	6500	EPI exp.	5	58553.7	0.479564	8	3	B(QSAR)	-	-	-	36	Lit. Exp.	8.12831e-05	Lit exp.
p106-50-3,h12236-64-5,h24731-73-5,h41506-62-1	Nc1ccc(cc1)N	p-phenylenediamine	hydrolysis_product,parent_chemical	108.144	organic	ionizable	5	5	0.707107		5	0	Swater (OECD & lit exp.)	4	B(QSAR)	4	B(QSAR) V(QSAR avg.)	0.707107	(M4-5)	(P3-4)	(P3-4)	B	polyprotic	-	-	-	-1.08872	0.584881	Avg. QSAR	5	-1.08872	0.584881	5	34000	OECD exp.	5	295793	1.26613	8	4	B(QSAR)	-	-	-	0.086541	QSAR avg.	2.30236e-08	QSAR avg.
p106-51-4	O=C1C=CC(=O)C=C1	p-benzoquinone	parent_chemical	108.097	organic	neutral	Unstable MOC	Unstable MOC	0		5	0	Swater (EPI exp.)	1	B(QSAR)	1	B(QSAR) V(EPI exp.)	0	(M4-5)	(P1-2)	(P1-2)	N	N	-	-	-	0.446675	0.407867	Avg. QSAR	5	0.446675	0.407867	5	11100	EPI exp.	5	23568.3	1.15867	8	1	B(QSAR)	-	-	-	11.997	EPIwin Exp.	0.0195885	EPI exp.
p106-58-1	CN1CCN(CC1)C	1,4-dimethylpiperazine	parent_chemical	114.192	organic	ionizable	Unstable MOC	Unstable MOC	0.447214	exp	4	0.447214	Doc (OECD & lit exp.)	1	B(exp)	1	B(exp)	0	(M2-3)	(P3-4)	(P3-4)	B	polyprotic	-	1.69	OECD exp.	-0.26		OECD exp	5	-1.75185	1.82297	5	1000000	OECD exp.	5	3.32724e+07	2.52165	8	1	B(exp)	-	-	-	1565.92	QSAR avg.	3.97322e-06	QSAR avg.
p106-63-8	C=CC(=O)OCC(C)C	isobutyl acrylate	parent_chemical	128.172	organic	neutral	Transient	Transient	0.57735		3	0.57735	Doc (OECD & lit exp.)	1	B(QSAR)	1	B(QSAR) V(EPI exp.)	0	(M2-3)	(P1-2)	(P1-2)	N	N	-	2.26	OECD exp.	2.22		lit exp.	4	2.06492	0.100848	5	1800	EPI exp.	4	2959.17	0.608966	8	1	B(QSAR)	4	OECD exp.	-	958	OECD exp.	0.0309163	EPI exp.
p106-65-0	COC(=O)CCC(=O)OC	dimethyl succinate	parent_chemical	146.144	organic	neutral	Unstable MOC	Unstable MOC	0	exp	5	0	Swater (OECD & lit exp.)	1	B(exp)	1	B(exp)	0	(M4-5)	(P1-2)	(P1-2)	N	N	-	-	-	0.266835	0.286293	Avg. QSAR	5	0.266835	0.286293	5	134000	OECD exp.	5	97513.3	1.14429	8	1	B(exp)	4	Hydrowin	-	23.5	OECD exp.	1.03447e-05	OECD exp.
p106-70-7	CCCCCC(=O)OC	methyl hexanoate	parent_chemical	130.188	organic	neutral	Unstable MOC	Unstable MOC	0		4	0	Doc (PP-LFER)	1	B(QSAR)	1	B(QSAR) V(OECD exp.)	0	(M2-3)	(P1-2)	(P1-2)	N	N	-	1.42376	PP-LFER	2.42		lit exp.	4	2.19224	0.186314	5	1330	EPI exp.	4	1931.98	0.485575	8	1	B(QSAR)	4	OECD exp.	-	496	OECD exp.	0.0151338	OECD exp.
p106-79-6	COC(=O)CCCCCCCCC(=O)OC	dimethyl sebacate	parent_chemical	230.306	organic	neutral	Transient	Transient	0		3	0	Swater (OECD & lit exp.)	1	B(QSAR)	1	B(QSAR)	0	(M2-3)	(P1-2)	(P1-2)	N	N	-	-	-	3.0906	0.39198	Avg. QSAR	3	3.0906	0.39198	5	301	OECD exp.	3	367.077	1.25706	8	1	B(QSAR)	4	Hydrowin	-	0.08	OECD exp.	2.4706e-05	OECD exp.
p106-88-7	CCC1CO1	1,2-epoxybutane	parent_chemical	72.1076	organic	neutral	3	Unstable MOC	0.707107		5	0	Doc (OECD & lit exp.)	2	B(QSAR) H(LHC QSAR)	1	V(EPI exp.)	0.707107	(M4-5)	(P1-2)	(P1-2)	N	N	-	0.652	OECD exp.	0.826372	0.109294	Avg. QSAR	5	0.826372	0.109294	5	95000	EPI exp.	5	37567	0.600656	8	2	B(QSAR)	2	LHC QSAR	-	23994	EPIwin Exp.	0.00736103	EPI exp.
p106-89-8,s933999-84-9	ClCC1CO1	1-chloro-2,3-epoxypropane:1,6-Hexanediol, reaction products with epichlorohydrin	parent_chemical,salt_or_mixture_component	92.5255	organic	neutral	Unstable MOC	Unstable MOC	0	exp	5	0	Swater (OECD & lit exp.)	1	B(exp) H(OECD exp.)	1	B(exp) V(OECD exp.) H(OECD exp.)	0	(M4-5)	(P1-2)	(P1-2)	N	N	-	-	-	0.45		OECD exp	5	0.613523	0.052022	5	65900	OECD exp.	5	49626.8	0.545674	8	1	B(exp)	1	OECD exp.	-	2243.73	OECD exp.	0.00127151	OECD exp.
p106-91-2	CC(=C)C(=O)OCC1CO1	2,3-epoxypropyl methacrylate	parent_chemical	142.156	organic	neutral	Unstable MOC	Unstable MOC	0	exp	5	0	Swater (OECD & lit exp.)	1	B(exp)	1	B(exp) V(OECD exp.)	0	(M4-5)	(P1-2)	(P1-2)	N	N	-	-	-	0.934445	0.17727	Avg. QSAR	5	0.934445	0.17727	5	50000	OECD exp.	5	27395.9	0.517949	8	1	B(exp)	2	LHC QSAR	-	420	OECD exp.	0.000481967	OECD exp.
p106-92-3	C=CCOCC1CO1	allyl 2,3-epoxypropyl ether	parent_chemical	114.145	organic	neutral	Unstable MOC	Unstable MOC	1.41421	exp	5	0	Doc (OECD & lit exp.)	1	H(OECD exp.)	1	H(OECD exp.)	1.41421	(M4-5)	(P3-4)	(P1-2)	N	N	-	0.9063	OECD exp.	0.581939	0.197071	Avg. QSAR	5	0.581939	0.197071	5	128000	OECD exp.	5	56201.2	0.662259	8	4	B(QSAR)	1	OECD exp.	-	630	OECD exp.	0.000226757	OECD exp.
p106-93-4	BrCCBr	1,2-dibromoethane	parent_chemical	187.872	organic	neutral	3	Unstable MOC	0.57735		5	0.57735	Doc (OECD & lit exp.)	2	B(QSAR)	1	V(Lit exp.)	0	(M2-3)	(P3-4)	(P3-4)	N	N	-	0.314	OECD exp.	1.85	0.155563	lit exp.	4	1.87875	0.156947	5	3910	EPI exp.	4	2954.81	0.672124	8	2	B(QSAR)	4	OECD exp.	4	1550	Lit. Exp.	0.0194984	Lit exp.
p106-94-5	CCCBr	1-bromopropane	parent_chemical	122.998	organic	neutral	2	Unstable MOC	0.707107	exp	4	0	Doc (OECD & lit exp.)	2	B(QSAR) H(OECD exp.)	1	V(Lit exp.)	0.707107	(M2-3)	(P1-2)	(P1-2)	N	N	-	1.79	OECD exp.	2.1	0	lit exp.	4	2.01981	0.163082	5	2450	EPI exp.	4	2778.81	0.398362	8	2	B(QSAR)	2	OECD exp.	-	18600	Lit. Exp.	0.389045	Lit exp.
p106-95-6	BrCC=C	3-bromopropene	parent_chemical	120.982	organic	neutral	Unstable MOC	Unstable MOC	0.707107		4	0	Swater (EPI exp.)	1	H(LHC QSAR)	1	V(QSAR avg.) H(LHC QSAR)	0.707107	(M2-3)	(P3-4)	(P1-2)	N	N	-	-	-	1.79052	0.19109	Avg. QSAR	4	1.79052	0.19109	5	3830	EPI exp.	4	5385.13	0.607396	8	2	B(QSAR)	1	LHC QSAR	-	14042	QSAR avg.	0.254942	QSAR avg.
p106-97-8	CCCC	butane	parent_chemical	58.1241	organic	neutral	Unstable MOC	Unstable MOC	0.57735		4	0.57735	Doc (PP-LFER)	1	B(QSAR)	1	B(QSAR) V(Lit exp.)	0	(M2-3)	(P1-2)	(P1-2)	N	N	-	1.6985	PP-LFER	2.89		lit exp.	3	2.47499	0.319143	5	61.2	OECD exp.	4	1171.32	2.0232	8	1	B(QSAR)	-	-	-	242606	EPIwin Exp.	33.1131	Lit exp.
p106-98-9,s25167-67-3	CCC=C	but-1-ene:butene	parent_chemical,salt_or_mixture_component	56.1082	organic	neutral	Transient	Transient	0.57735		3	0.57735	Doc (OECD & lit exp.)	1	B(QSAR)	1	B(QSAR) V(Lit exp.)	0	(M2-3)	(P1-2)	(P1-2)	N	N	-	2.04	OECD exp.	2.3		OECD exp	4	2.12648	0.252776	5	221	EPI exp.	4	1901.11	1.69458	8	1	B(QSAR)	-	-	-	296000	Lit. Exp.	10.2329	Lit exp.
p106-99-0	C=CC=C	buta-1,3-diene	parent_chemical	54.0922	organic	neutral	Unstable MOC	Unstable MOC	0.816497		5	0.816497	Doc (PP-LFER)	1	B(QSAR)	1	B(QSAR) V(Lit exp.)	0	(M2-3)	(P1-2)	(P1-2)	N	N	-	0.99702	PP-LFER	1.99		lit exp.	4	1.79476	0.261024	5	735	OECD exp.	4	3042.1	1.05627	8	1	B(QSAR)	-	-	-	281263	EPIwin Exp.	2.81838	Lit exp.
p107-01-7,s25167-67-3,h821-06-7	CC=CC	2-butene:butene	hydrolysis_product,parent_chemical,salt_or_mixture_component	56.1082	organic	neutral	Unstable MOC	Unstable MOC	0.5		4	0.5	Doc (OECD & lit exp.)	1	B(QSAR)	1	B(QSAR) V(EPI exp.)	0	(M4-5)	(P1-2)	(P1-2)	N	N	-	1.99	OECD exp.	2.08487	0.272406	Avg. QSAR	4	2.08487	0.272406	5	645	OECD exp.	4	2168.07	1.37764	8	1	B(QSAR)	-	-	-	234608	EPIwin Exp.	9.44666	EPI exp.
p107-02-8	C=CC=O	acrylaldehyde	parent_chemical	56.0646	organic	neutral	Unstable MOC	Unstable MOC	0		5	0	Doc (OECD & lit exp.)	1	B(QSAR)	1	B(QSAR) V(EPI exp.)	0	(M4-5)	(P1-2)	(P1-2)	N	N	-	0.441	OECD exp.	0.301941	0.144832	Avg. QSAR	5	0.301941	0.144832	5	212000	EPI exp.	5	99755.3	0.708358	8	1	B(QSAR)	-	-	-	36524.2	EPIwin Exp.	0.00498914	EPI exp.
p107-05-1	ClCC=C	3-chloropropene	parent_chemical	76.5261	organic	neutral	Unstable MOC	Unstable MOC	0	exp	4	0	Doc (OECD & lit exp.)	1	B(exp) H(OECD exp.)	1	B(exp) V(Lit exp.) H(OECD exp.)	0	(M2-3)	(P1-2)	(P1-2)	N	N	-	1.67	OECD exp.	2.1		OECD exp	4	1.63683	0.183934	5	3370	EPI exp.	4	5704.39	0.549421	8	1	B(exp)	1	OECD exp.	-	49054.4	EPIwin Exp.	0.380189	Lit exp.
p107-06-2	ClCCCl	1,2-dichloroethane	parent_chemical	98.9601	organic	neutral	2	Unstable MOC	0		4	0	Doc (PP-LFER)	2	B(QSAR) H(LHC QSAR)	1	V(OECD exp.)	0	(M2-3)	(P3-4)	(P1-2)	N	N	-	1.13482	PP-LFER	1.45		OECD exp	4	1.56782	0.166988	5	8800	OECD exp.	4	5651.4	0.544283	8	2	B(QSAR)	2	LHC QSAR	-	10222.4	OECD exp.	0.0463984	OECD exp.
p107-07-3,h107-06-2,h111-44-4,h111-91-1,h115-96-8,h628-89-7,h1235-23-0,h38051-10-4,h68259-05-2	OCCCl	2-chloroethanol	hydrolysis_product,parent_chemical	80.5144	organic	neutral	Unstable MOC	Unstable MOC	0	exp	5	0	Doc (OECD & lit exp.)	1	B(exp)	1	B(exp)	0	(M4-5)	(P1-2)	(P1-2)	N	N	-	0.28	OECD exp.	-0.06		lit exp.	5	0.142139	0.0969841	5	1000000	EPI exp.	5	237021	0.624583	8	1	B(exp)	2	LHC QSAR	-	957.094	EPIwin Exp.	3.11208e-05	EPI exp.
p107-10-8,h1093205-93-6,h1093205-95-8	CCCN	propylamine	hydrolysis_product,parent_chemical	59.1117	organic	ionizable	Unstable MOC	Unstable MOC	0		5	0	Doc (PP-LFER)	1	B(QSAR)	1	B(QSAR) V(OECD exp.)	0	(M4-5)	(P1-2)	(P1-2)	B	10.54	Exp (CRC)	-7.05426	PP-LFER	-6.17	0.155563	lit exp.	5	-3.59707	2.41217	5	1000000	EPI exp.	5	1.00044e+12	1.29197	8	1	B(QSAR)	-	-	-	42100	Lit. Exp.	0.000811278	OECD exp.
p107-11-9	NCC=C	allylamine	parent_chemical	57.0958	organic	ionizable	Unstable MOC	Unstable MOC	0		5	0	Swater (EPI exp.)	1	B(QSAR)	1	B(QSAR) V(EPI exp.)	0	(M2-3)	(P1-2)	(P1-2)	B	9.49	Exp (CRC)	-	-	-5.46		lit exp.	5	-3.30851	1.93225	5	1000000	EPI exp.	5	1.47718e+11	1.4352	8	1	B(QSAR)	-	-	-	32000	OECD exp.	0.000744282	EPI exp.
p107-13-1	C=CC#N	acrylonitrile	parent_chemical	53.0639	organic	neutral	Unstable MOC	Unstable MOC	0		5	0	Doc (PP-LFER)	1	B(QSAR)	1	B(QSAR) V(EPI exp.)	0	(M4-5)	(P1-2)	(P1-2)	N	N	-	-0.1283	PP-LFER	0.518989	0.313803	Avg. QSAR	5	0.518989	0.313803	5	74500	EPI exp.	5	43014.8	0.604408	8	1	B(QSAR)	-	-	-	14529.7	EPIwin Exp.	0.00564346	EPI exp.
p107-15-3,h96-45-7,h110-31-6,h120-93-4,h123-26-2,h871-78-3,h936-49-2,h10543-57-4,h32588-76-4,h689293-69-4	NCCN	ethylenediamine	hydrolysis_product,parent_chemical	60.0994	organic	ionizable	Transient	Transient	1.73205		2	1.73205	Doc (OECD & lit exp.)	1	B(QSAR)	1	B(QSAR)	0	(M4-5)	(P1-2)	(P1-2)	B	polyprotic	-	3.68	OECD exp.	-3.63811	2.18087	Avg. QSAR	5	-3.63811	2.18087	5	1000000	EPI exp.	5	8.4111e+06	2.24206	8	1	B(QSAR)	-	-	-	1599.6	EPIwin Exp.	7.07477e-08	EPI exp.
p107-18-6,h96-05-9,h106-92-3,h106-95-6,h107-05-1,h123-68-2,h131-17-9,h142-19-8,h142-22-3,h682-09-7,h682-11-1,h1118-84-9,h2705-87-5,h15022-08-9,h19444-21-4,h141818-73-7,h174489-43-1,h174489-76-0,h204918-22-9	OCC=C	allyl alcohol	hydrolysis_product,parent_chemical	58.0805	organic	neutral	Unstable MOC	Unstable MOC	0		5	0	Doc (PP-LFER)	1	B(exp)	1	B(exp)	0	(M4-5)	(P1-2)	(P1-2)	N	N	-	-0.45586	PP-LFER	0.17		lit exp.	5	0.184002	0.0618686	5	1000000	EPI exp.	5	169535	0.518817	8	1	B(exp)	-	-	-	3454.98	OECD exp.	0.000204174	Lit exp.
p107-19-7,s38172-91-7,h624-65-7,h2312-35-8,h76114-73-3	OCC#C	prop-2-yn-1-ol:2-Propyn-1-ol, compd. with 2-methyloxirane (1:?)	hydrolysis_product,parent_chemical,salt_or_mixture_component	56.0646	organic	neutral	Unstable MOC	Unstable MOC	0	exp	5	0	Swater (EPI exp.)	1	B(exp)	1	B(exp)	0	(M4-5)	(P1-2)	(P1-2)	N	N	-	-	-	-0.110152	0.530058	Avg. QSAR	5	-0.110152	0.530058	5	1000000	EPI exp.	5	340552	0.869923	8	1	B(exp)	-	-	-	1722	OECD exp.	4.70288e-05	EPI exp.
p107-20-0,h79-00-5,h97-97-2	ClCC=O	chloroacetaldehyde	hydrolysis_product,parent_chemical	78.4985	organic	neutral	Unstable MOC	Unstable MOC	0		5	0	Swater (Avg. QSAR)	1	B(QSAR)	1	B(QSAR) V(QSAR avg.)	0	(M4-5)	(P1-2)	(P1-2)	N	N	-	-	-	0.133974	0.194644	Avg. QSAR	5	0.133974	0.194644	5	140392	QSAR avg	5	140392	0.899931	8	1	B(QSAR)	-	-	-	8571.19	EPIwin Exp.	0.000723776	QSAR avg.
p107-21-1,h51-03-6,h75-21-8,h78-51-3,h94-28-0,h96-49-1,h97-90-5,h104-68-7,h105-95-3,h106-93-4,h107-06-2,h107-07-3,h109-16-0,h109-59-1,h109-86-4,h110-71-4,h110-80-5,h111-21-7,h111-46-6,h111-55-7,h111-76-2,h111-77-3,h111-90-0,h111-96-6,h112-07-2,h112-15-2,h112-25-4,h112-27-6,h112-33-4,h112-34-5,h112-35-6,h112-36-7,h112-49-2,h112-50-5,h112-59-4,h112-60-7,h112-73-2,h115-96-8,h120-55-8,h124-17-4,h141-…	OCCO	ethane-1,2-diol	hydrolysis_product,parent_chemical	62.0688	organic	neutral	Unstable MOC	Unstable MOC	0	exp	5	0	Swater (EPI exp.)	1	B(exp)	1	B(exp)	0	(M4-5)	(P1-2)	(P1-2)	N	N	-	-	OECD exp.	-1.2377	0.224522	Avg. QSAR	5	-1.2377	0.224522	5	1000000	EPI exp.	5	1.22332e+06	0.809413	8	1	B(exp)	-	-	-	12.3	OECD exp.	2.45368e-06	EPI exp.
p107-22-2,h956317-36-5	O=CC=O	glyoxal	hydrolysis_product,parent_chemical	58.0369	organic	neutral	Unstable MOC	Unstable MOC	0	exp	5	0	Doc (OECD & lit exp.)	1	B(exp)	1	B(exp)	0	(M4-5)	(P1-2)	(P1-2)	N	N	-	0.32	OECD exp.	-0.755627	0.654788	Avg. QSAR	5	-0.755627	0.654788	5	1000000	EPI exp.	5	838983	1.34042	8	1	B(exp)	-	-	-	33991.5	EPIwin Exp.	1.36424e-07	OECD exp.
p107-25-5	COC=C	methyl vinyl ether	parent_chemical	58.0805	organic	neutral	3	Unstable MOC	0.707107		5	0	Doc (OECD & lit exp.)	2	B(QSAR)	1	V(OECD exp.)	0.707107	(M4-5)	(P1-2)	(P1-2)	N	N	-	0.73	OECD exp.	0.669462	0.40488	Avg. QSAR	5	0.669462	0.40488	5	17100	OECD exp.	5	55662.1	0.730594	8	2	B(QSAR)	4	OECD exp.	-	175400	OECD exp.	0.240457	OECD exp.
p107-29-9	C/C=N\O	acetaldehyde oxime	parent_chemical	59.0681	organic	ionizable	3	3	0.707107		5	0	Doc (PP-LFER)	2	B(QSAR) H(LHC QSAR)	2	B(QSAR) H(LHC QSAR)	0.707107	(M4-5)	(P1-2)	(P1-2)	amph	amphoprotic	-	-0.77066	PP-LFER	-0.374494	0.443936	Avg. QSAR	5	-0.374494	0.443936	5	110965	QSAR avg	5	110965	0.660167	8	2	B(QSAR)	2	LHC QSAR	-	369.909	QSAR avg.	8.47054e-05	PP-LFER
p107-31-3,h149-73-5	COC=O	methyl formate	hydrolysis_product,parent_chemical	60.0529	organic	neutral	Unstable MOC	Unstable MOC	0	exp	5	0	Doc (OECD & lit exp.)	1	B(exp) H(OECD exp.)	1	B(exp) V(OECD exp.) H(OECD exp.)	0	(M4-5)	(P1-2)	(P1-2)	N	N	-	0.33	OECD exp.	-0.115	0.205061	lit exp.	5	-0.0918516	0.0538141	5	230000	EPI exp.	5	177594	0.440333	8	1	B(exp)	1	OECD exp.	-	78100	OECD exp.	0.00912183	OECD exp.
p107-35-7	[NH3+]CCS(=O)(=O)[O-]	taurine	parent_chemical	125.147	organic	zwitterion	3	3	0.707107		5	0	Swater (Avg. QSAR)	2	B(QSAR)	2	B(QSAR)	0.707107	(M4-5)	(P3-4)	(P3-4)	amph	amphoprotic	-	-	-	-4.07543	1.00266	Avg. QSAR	5	-4.07543	1.00266	4	3.57952e+06	QSAR avg	5	3.57952e+06	1.97047	6	2	B(QSAR)	-	-	-	1.30367e-07	QSAR avg.	6.50224e-18	QSAR avg.
p107-41-5,p6920-22-5	CCCCC(CO)O	2-methylpentane-2,4-diol:DL-hexane-1,2-diol	parent_chemical	118.177	organic	neutral	Unstable MOC	Unstable MOC	0		5	0	Swater (Avg. QSAR)	1	B(exp)	1	B(exp)	0	(M4-5)	(P1-2)	(P1-2)	N	N	-	-	-	0.602894	0.235204	Avg. QSAR	5	0.602894	0.235204	5	96249.9	QSAR avg	5	96249.9	1.22573	8	1	B(exp)	-	-	-	2.52112	QSAR avg.	6.21122e-06	QSAR avg.
p107-43-7	[O-]C(=O)C[N+](C)(C)C	betaine	parent_chemical	118.157	organic	zwitterion	Unstable MOC	Unstable MOC	0		5	0	Swater (Avg. QSAR)	1	B(exp)	1	B(exp)	0	(M4-5)	(P3-4)	(P1-2)	amph	amphoprotic	-	-	-	-3.9638	1.25459	Avg. QSAR	5	-3.9638	1.25459	5	2.74839e+06	QSAR avg	5	2.74839e+06	2.15318	6	1	B(exp)	-	-	-	0.05	OECD exp.	7.9949e-16	QSAR avg.
p107-45-9,h4223-03-4	CC(CC(N)(C)C)(C)C	1,1,3,3-tetramethylbutylamine	hydrolysis_product,parent_chemical	129.247	organic	ionizable	5	Unstable MOC	0.707107		5	0	Swater (Avg. QSAR)	3	B(QSAR)	1	V(QSAR avg.)	0.707107	(M2-3)	(P1-2)	(P3-4)	B	10.3475	QSAR (SPARC)	-	-	0.582312	1.46522	Avg. QSAR	5	-1.9567	2.38408	5	1.04134e+10	QSAR avg	5	1.04134e+10	1.20476	8	3	B(QSAR)	-	-	-	1051.67	QSAR avg.	0.00247638	QSAR avg.
p107-46-0	C[Si](O[Si](C)(C)C)(C)C	hexamethyldisiloxane	parent_chemical	162.381	organo_silane	neutral	Transient	Transient	1.68325		3	1.52753	Doc (PP-LFER)	1	H(OECD exp.)	1	V(OECD exp.) H(OECD exp.)	0.707107	(M2-3)	(P1-2)	(P1-2)	N	N	-	2.6911	PP-LFER	4.38355	1.12817	Avg. QSAR	2	4.38355	1.12817	5	1.96587e+06	QSAR avg	5	1.96587e+06	2.6438	8	3	B(QSAR)	1	OECD exp.	-	5500	OECD exp.	260.336	OECD exp.
p107-51-7	C[Si](O[Si](C)(C)C)(O[Si](C)(C)C)C	octamethyltrisiloxane	parent_chemical	236.537	organo_silane	neutral	Transient	Transient	2.51661	exp	2	2.08167	Doc (OECD & lit exp.)	1	H(OECD exp.)	1	V(EPI exp.) H(OECD exp.)	1.41421	(M2-3)	(P1-2)	(P1-2)	N	N	-	4.3425	OECD exp.	5.53241	1.53297	Avg. QSAR	1	5.53241	1.53297	5	7.09778e+06	QSAR avg	5	7.09778e+06	2.64559	8	4	B(QSAR)	1	OECD exp.	-	1215	OECD exp.	134.134	EPI exp.
p107-58-4	C=CC(=O)NC(C)(C)C	N-tert-butylacrylamide	parent_chemical	127.187	organic	ionizable	3	3	0.707107		5	0	Swater (Avg. QSAR)	2	B(QSAR)	2	B(QSAR)	0.707107	(M4-5)	(P1-2)	(P1-2)	amph	amphoprotic	-	-	-	1.12256	0.158154	Avg. QSAR	5	1.12256	0.158154	5	19905.4	QSAR avg	5	19905.4	1.20151	8	2	B(QSAR)	-	-	-	4.82409	QSAR avg.	1.73665e-05	QSAR avg.
p107-75-5	O=CCC(CCCC(O)(C)C)C	7-hydroxycitronellal	parent_chemical	172.269	organic	neutral	2	2	0.707107		4	0	Swater (Avg. QSAR)	2	B(QSAR)	2	B(QSAR)	0.707107	(M4-5)	(P1-2)	(P1-2)	N	N	-	-	-	1.94748	0.19105	Avg. QSAR	4	1.94748	0.19105	5	8370.45	QSAR avg	4	8370.45	1.01159	8	2	B(QSAR)	-	-	-	0.614116	QSAR avg.	8.66712e-07	QSAR avg.
p107-85-7	NCCC(C)C	isopentylamine	parent_chemical	87.1658	organic	ionizable	Unstable MOC	Unstable MOC	0		5	0	Doc (OECD & lit exp.)	1	B(QSAR)	1	B(QSAR) V(QSAR avg.)	0	(M2-3)	(P1-2)	(P1-2)	B	10.3983	QSAR (SPARC)	-4.46327	OECD exp.	-6.25927		OECD exp	5	-2.7076	2.13323	5	9.67241e+10	QSAR avg	5	9.67241e+10	1.11727	8	1	B(QSAR)	-	-	-	5841.87	QSAR avg.	0.00171615	QSAR avg.
p107-86-8	O=CC=C(C)C	3-methyl-2-butenal	parent_chemical	84.1187	organic	neutral	Unstable MOC	Unstable MOC	0		5	0	Doc (OECD & lit exp.)	1	B(QSAR)	1	B(QSAR) V(QSAR avg.)	0	(M4-5)	(P1-2)	(P1-2)	N	N	-	0.986	OECD exp.	1.10817	0.221049	Avg. QSAR	5	1.10817	0.221049	5	28245.2	QSAR avg	5	28245.2	0.931371	8	1	B(QSAR)	-	-	-	2904.97	QSAR avg.	0.00314499	QSAR avg.
p107-87-9,h623-40-5	CCCC(=O)C	pentan-2-one	hydrolysis_product,parent_chemical	86.1346	organic	neutral	Unstable MOC	Unstable MOC	0		5	0	Doc (PP-LFER)	1	B(exp)	1	B(exp) V(Lit exp.)	0	(M4-5)	(P1-2)	(P1-2)	N	N	-	0.1327	PP-LFER	0.91	0	lit exp.	5	1.04301	0.196198	5	72600	OECD exp.	5	25012.9	0.529591	8	1	B(exp)	-	-	-	4970	Lit. Exp.	0.00263027	Lit exp.
p107-88-0,h1117-31-3,h1189-08-8,h2517-43-3,h4435-53-4	OCCC(O)C	butane-1,3-diol	hydrolysis_product,parent_chemical	90.1229	organic	neutral	Unstable MOC	Unstable MOC	0		5	0	Doc (PP-LFER)	1	B(exp)	1	B(exp)	0	(M4-5)	(P1-2)	(P1-2)	N	N	-	-1.01352	PP-LFER	-0.622184	0.271321	Avg. QSAR	5	-0.622184	0.271321	5	100000	OECD exp.	5	695796	0.847747	8	1	B(exp)	-	-	-	2.6733	OECD exp.	9.72426e-07	OECD exp.
p107-92-6,h106-31-0,h109-74-0,h141-75-3,h533-68-6,h59875-04-6,h94695-50-8,h113889-23-9,h144689-24-7,h144689-93-0,h144690-96-0,h144702-27-2,h152628-03-0	CCCC(=O)O	butyric acid	hydrolysis_product,parent_chemical	88.107	organic	ionizable	Unstable MOC	Unstable MOC	0		5	0	Doc (OECD & lit exp.)	1	B(QSAR)	1	B(QSAR)	0	(M4-5)	(P1-2)	(P1-2)	A	4.9	Exp (OECD)	-3.425	OECD exp.	-4.31	0	lit exp.	5	-2.78351	1.707	5	60000	EPI exp.	5	5.66992e+09	0.882906	8	1	B(QSAR)	-	-	-	221	Lit. Exp.	2.18776e-05	Lit exp.
p107-93-7	CC=CC(=O)O	trans-crotonic acid	parent_chemical	86.091	organic	ionizable	Unstable MOC	Unstable MOC	0		5	0	Doc (PP-LFER)	1	B(QSAR)	1	B(QSAR)	0	(M4-5)	(P1-2)	(P1-2)	A	4.7535	Exp (OECD (average))	-5.32746	PP-LFER	-0.618262	1.56585	Avg. QSAR	5	-2.71686	1.64621	5	86000	EPI exp.	5	4.56103e+09	1.02222	8	1	B(QSAR)	-	-	-	43.3225	EPIwin Exp.	2.72358e-06	EPI exp.
p107-94-8,h82530-64-1	OC(=O)CCCl	3-chloropropionic acid	hydrolysis_product,parent_chemical	108.525	organic	ionizable	Unstable MOC	Unstable MOC	0		5	0	Doc (OECD & lit exp.)	1	B(QSAR)	1	B(QSAR)	0	(M4-5)	(P1-2)	(P1-2)	A	3.995	Exp (OECD (average))	-5.66	OECD exp.	-0.956793	1.44213	Avg. QSAR	5	-3.35879	2.26315	5	6.79119e+10	QSAR avg	5	6.79119e+10	0.896844	8	1	B(QSAR)	2	LHC QSAR	-	133.251	QSAR avg.	3.8346e-06	QSAR avg.
p107-95-9	[O-]C(=O)CC[NH3+]	β-alanine	parent_chemical	89.0946	organic	zwitterion	Unstable MOC	Unstable MOC	0		5	0	Swater (Avg. QSAR)	1	B(exp)	1	B(exp)	0	(M4-5)	(P3-4)	(P3-4)	amph	amphoprotic	-	-	-	-4.08807	1.37784	Avg. QSAR	5	-4.08807	1.37784	5	1.15634e+07	QSAR avg	5	1.15634e+07	2.36042	6	1	B(exp)	-	-	-	6.7349e-06	OECD exp.	1.417e-16	QSAR avg.
p107-96-0,h2935-90-2,h7575-23-7,h30374-01-7,h71735-74-5,h938063-63-9	OC(=O)CCS	3-mercaptopropionic acid	hydrolysis_product,parent_chemical	106.144	organic	ionizable	Unstable MOC	Unstable MOC	0		5	0	Swater (Avg. QSAR)	1	B(exp)	1	B(exp)	0	(M4-5)	(P1-2)	(P1-2)	A	4.26353	QSAR (SPARC)	-	-	-8.05647		OECD exp	5	-3.4198	2.35241	5	6.77741e+10	QSAR avg	5	6.77741e+10	1.10546	8	1	B(exp)	-	-	-	5.158	OECD exp.	5.62778e-07	QSAR avg.
p107-98-2,h108-65-6	COCC(O)C	1-methoxypropan-2-ol	hydrolysis_product,parent_chemical	90.1229	organic	neutral	Unstable MOC	Unstable MOC	0		5	0	Doc (PP-LFER)	1	B(exp)	1	B(exp)	0	(M4-5)	(P1-2)	(P1-2)	N	N	-	-0.9965	PP-LFER	1		OECD exp	5	-0.256515	0.172726	5	1000000	OECD exp.	5	603670	0.737469	8	1	B(exp)	-	-	-	1562.75	OECD exp.	5.68458e-05	OECD exp.
p108-01-0,h58-73-1,h1704-62-7,h2439-35-2,h2867-47-2,h3033-62-3,h83016-70-0,h189253-72-3,h351197-46-1	OCCN(C)C	2-dimethylaminoethanol	hydrolysis_product,parent_chemical	89.1382	organic	ionizable	Unstable MOC	Unstable MOC	0	exp	5	0	Swater (EPI exp.)	1	B(exp)	1	B(exp)	0	(M4-5)	(P3-4)	(P3-4)	B	9.3	Exp (OECD)	-	-	-1.90965	1.31637	Avg. QSAR	5	-4.02965	2.06479	5	1000000	EPI exp.	5	1.53483e+11	1.23007	8	1	B(exp)	-	-	-	423.894	EPIwin Exp.	1.52537e-05	EPI exp.
p108-03-2	CCCN(=O)=O	1-nitropropane	parent_chemical	89.0946	organic	ionizable	Unstable MOC	Unstable MOC	0		5	0	Doc (PP-LFER)	1	B(QSAR)	1	B(QSAR) V(Lit exp.)	0	(M2-3)	(P3-4)	(P3-4)	A	9.22587	QSAR (SPARC)	-0.378094	PP-LFER	-0.0516545		OECD exp	5	0.447251	0.431851	5	15000	EPI exp.	5	123313	0.998551	8	1	B(QSAR)	-	-	-	1360	Lit. Exp.	0.00354813	Lit exp.
p108-05-4	CC(=O)OC=C	vinyl acetate	parent_chemical	86.091	organic	neutral	Unstable MOC	Unstable MOC	0	exp	5	0	Swater (OECD & lit exp.)	1	B(exp) H(LHC QSAR)	1	B(exp) V(EPI exp.) H(LHC QSAR)	0	(M4-5)	(P1-2)	(P1-2)	N	N	-	-	-	0.73		lit exp.	5	0.505181	0.267897	5	20000	OECD exp.	5	42438.4	0.475368	8	1	B(exp)	1	LHC QSAR	-	12023.7	EPIwin Exp.	0.0208972	EPI exp.
p108-10-1,h5660-53-7,h10595-60-5	CC(CC(=O)C)C	4-methylpentan-2-one	hydrolysis_product,parent_chemical	100.162	organic	neutral	Unstable MOC	Unstable MOC	0.547723		5	0.547723	Doc (PP-LFER)	1	B(exp)	1	B(exp) V(Lit exp.)	0	(M2-3)	(P1-2)	(P1-2)	N	N	-	0.51166	PP-LFER	1.9		OECD exp	4	1.37609	0.156212	5	14100	OECD exp.	5	12940.5	0.592936	8	1	B(exp)	-	-	-	2640	Lit. Exp.	0.0057544	Lit exp.
p108-11-2	CC(CC(O)C)C	4-methylpentan-2-ol	parent_chemical	102.178	organic	neutral	Unstable MOC	Unstable MOC	0.5		5	0.5	Doc (PP-LFER)	1	B(exp)	1	B(exp) V(Lit exp.)	0	(M2-3)	(P1-2)	(P1-2)	N	N	-	0.61986	PP-LFER	1.62292	0.0725891	Avg. QSAR	4	1.62292	0.0725891	5	21800	OECD exp.	5	13708.5	0.373017	8	1	B(exp)	-	-	-	698	Lit. Exp.	0.0018197	Lit exp.
p108-12-3	CC(CC(=O)Cl)C	isovaleryl chloride	parent_chemical	120.58	organic	neutral	Unstable MOC	Unstable MOC	0.912871		5	0.57735	Doc (OECD & lit exp.)	1	H(LHC QSAR)	1	V(QSAR avg.) H(LHC QSAR)	0.707107	(M4-5)	(P1-2)	(P1-2)	N	N	-	0.91745	OECD exp.	1.63101	0.425546	Avg. QSAR	4	1.63101	0.425546	5	8360.67	QSAR avg	4	8360.67	1.06812	8	2	B(QSAR)	1	LHC QSAR	-	2670	OECD exp.	0.0649207	QSAR avg.
p108-16-7	CN(CC(O)C)C	1-(dimethylamino)propan-2-ol	parent_chemical	103.165	organic	ionizable	Unstable MOC	Unstable MOC	0	exp	5	0	Doc (OECD & lit exp.)	1	B(exp)	1	B(exp)	0	(M4-5)	(P3-4)	(P3-4)	B	9.8	Exp (OECD)	-4.99497	OECD exp.	-1.48264	1.34573	Avg. QSAR	5	-3.80264	2.27678	5	3.70124e+11	QSAR avg	5	3.70124e+11	1.26666	8	1	B(exp)	-	-	-	1580	OECD exp.	5.37164e-07	QSAR avg.
p108-18-9	CC(NC(C)C)C	diisopropylamine	parent_chemical	101.193	organic	ionizable	3	Unstable MOC	0.83666		5	0.447214	Doc (OECD & lit exp.)	2	B(QSAR)	1	V(OECD exp.)	0.707107	(M2-3)	(P1-2)	(P1-2)	B	11.05	Exp (CRC)	-5.23	OECD exp.	-5.65		OECD exp	5	-2.76159	2.34404	5	1.23422e+12	OECD exp.	5	3.71308e+11	1.32009	8	2	B(QSAR)	-	-	-	10560.2	OECD exp.	0.00392106	OECD exp.
p108-20-3	CC(OC(C)C)C	diisopropyl ether	parent_chemical	102.178	organic	neutral	5	Unstable MOC	1.09545		5	0.83666	Doc (PP-LFER)	3	B(QSAR)	1	V(EPI exp.)	0.707107	(M2-3)	(P1-2)	(P1-2)	N	N	-	0.59518	PP-LFER	2.4		OECD exp	4	1.73125	0.151377	5	3110	OECD exp.	5	13544.4	1.11147	8	3	B(QSAR)	-	-	-	19900	Lit. Exp.	0.10469	EPI exp.
p108-21-4	CC(OC(=O)C)C	isopropyl acetate	parent_chemical	102.134	organic	neutral	Unstable MOC	Unstable MOC	0		5	0	Doc (PP-LFER)	1	B(exp)	1	B(exp) V(Lit exp.)	0	(M2-3)	(P1-2)	(P1-2)	N	N	-	0.33204	PP-LFER	1.02		lit exp.	5	1.00644	0.281607	5	31900	OECD exp.	5	31644.6	0.900971	8	1	B(exp)	4	OECD exp.	-	8051.32	EPIwin Exp.	0.0114815	Lit exp.
p108-22-5	CC(=C)OC(=O)C	isopropenyl acetate	parent_chemical	100.118	organic	neutral	Unstable MOC	Unstable MOC	0		5	0	Swater (Avg. QSAR)	1	B(exp) H(LHC QSAR)	1	B(exp) V(QSAR avg.) H(LHC QSAR)	0	(M4-5)	(P1-2)	(P1-2)	N	N	-	-	-	0.885294	0.360145	Avg. QSAR	5	0.885294	0.360145	5	27771.6	QSAR avg	5	27771.6	0.756476	8	1	B(exp)	1	LHC QSAR	-	4286.59	QSAR avg.	0.0414294	QSAR avg.
p108-23-6	CC(OC(=O)Cl)C	isopropyl chloroformate	parent_chemical	122.552	organic	neutral	Unstable MOC	Unstable MOC	0.57735		5	0.57735	Swater (OECD & lit exp.)	1	H(LHC QSAR)	1	V(OECD exp.) H(LHC QSAR)	0	(M4-5)	(P1-2)	(P1-2)	N	N	-	-	-	1.55758	0.308892	Avg. QSAR	4	1.55758	0.308892	5	12590	OECD exp.	5	13307.9	0.853819	8	2	B(QSAR)	1	LHC QSAR	-	4932.1	EPIwin Exp.	0.169722	OECD exp.
p108-24-7	CC(=O)OC(=O)C	acetic anhydride	parent_chemical	102.09	organic	neutral	Unstable MOC	Unstable MOC	0	exp	5	0	Doc (OECD & lit exp.)	1	B(exp) H(Hydrowin)	1	B(exp) H(Hydrowin)	0	(M4-5)	(P1-2)	(P1-2)	N	N	-	0.075	OECD exp.	-0.429626	0.173741	Avg. QSAR	5	-0.429626	0.173741	5	120000	EPI exp.	5	227236	0.907254	8	1	B(exp)	1	Hydrowin	-	680	OECD exp.	0.000233508	EPI exp.
p108-26-9	O=C1NN=C(C1)C	2,4-dihydro-5-methyl-3H-pyrazol-3-one	parent_chemical	98.105	organic	ionizable	Unstable MOC	Unstable MOC	0.707107		5	0	Swater (Avg. QSAR)	1	H(LHC QSAR)	1	H(LHC QSAR)	0.707107	(M4-5)	(P1-2)	(P1-2)	amph	amphoprotic	-	-	-	0.126		OECD exp	5	-0.43888	0.460347	5	111441	QSAR avg	5	111441	0.905863	8	2	B(QSAR)	1	LHC QSAR	-	0.0381546	QSAR avg.	4.38969e-07	QSAR avg.
p108-30-5	O=C1CCC(=O)O1	succinic anhydride	parent_chemical	100.074	organic	neutral	Unstable MOC	Unstable MOC	0		5	0	Swater (Avg. QSAR)	1	B(exp) H(LHC QSAR)	1	B(exp) V(QSAR avg.) H(LHC QSAR)	0	(M4-5)	(P1-2)	(P1-2)	N	N	-	-	-	-0.525992	1.05182	Avg. QSAR	5	-0.525992	1.05182	5	273428	QSAR avg	5	273428	1.45618	8	1	B(exp)	1	LHC QSAR	-	0.19995	EPIwin Exp.	0.000321047	QSAR avg.
p108-31-6	O=C1C=CC(=O)O1	maleic anhydride	parent_chemical	98.0585	organic	neutral	Unstable MOC	Unstable MOC	0	exp	5	0	Doc (OECD & lit exp.)	1	B(exp) H(LHC QSAR)	1	B(exp) H(LHC QSAR)	0	(M4-5)	(P1-2)	(P1-2)	N	N	-	0.815	OECD exp.	0.0375554	1.24882	Avg. QSAR	5	0.0375554	1.24882	5	409000	OECD exp.	5	120665	1.49077	8	1	B(exp)	1	LHC QSAR	-	33.325	EPIwin Exp.	8.03684e-05	QSAR avg.
p108-32-7	CC1COC(=O)O1	propylene carbonate	parent_chemical	102.09	organic	neutral	Unstable MOC	Unstable MOC	0	exp	5	0	Swater (OECD & lit exp.)	1	B(exp) H(LHC QSAR)	1	B(exp) H(LHC QSAR)	0	(M4-5)	(P1-2)	(P1-2)	N	N	-	-	-	0.0744487	0.789314	Avg. QSAR	5	0.0744487	0.789314	5	240000	OECD exp.	5	110176	0.778548	8	1	B(exp)	1	LHC QSAR	-	5.24625	OECD exp.	9.00734e-07	OECD exp.
p108-38-3,s1330-20-7	Cc1cccc(c1)C	m-xylene:xylene	parent_chemical,salt_or_mixture_component	106.168	organic	neutral	1	Transient	0.707107		3	0	Doc (OECD & lit exp.)	2	B(QSAR)	1	V(Lit exp.)	0.707107	(M2-3)	(P3-4)	(P3-4)	N	N	-	2.73	OECD exp.	3.2	0	lit exp.	3	3.01593	0.126124	5	146	OECD exp.	3	238.785	0.704171	8	2	B(QSAR)	-	-	-	1130	Lit. Exp.	0.245471	Lit exp.
p108-39-4,s1319-77-3	Cc1cccc(c1)O	m-cresol:cresol	parent_chemical,salt_or_mixture_component	108.141	organic	ionizable	Unstable MOC	Unstable MOC	0.5		5	0.5	Doc (PP-LFER)	1	B(QSAR)	1	B(QSAR)	0	(M4-5)	(P1-2)	(P1-2)	A	10.09	Exp (CRC)	0.950843	PP-LFER	1.71164	0.0141421	lit exp.	4	1.83024	0.160769	5	41151.3	OECD exp.	5	17013.8	0.682771	8	1	B(QSAR)	-	-	-	16.725	OECD exp.	3.5115e-05	OECD exp.
p108-42-9,h2909-38-8	Nc1cccc(c1)Cl	3-chloroaniline	hydrolysis_product,parent_chemical	127.574	organic	ionizable	4.5	4.5	1.65831		4	1.5	Doc (PP-LFER)	4	B(QSAR)	4	B(QSAR) V(Lit exp.)	0.707107	(M2-3)	(P3-4)	(P3-4)	B	3.52	Exp (CRC)	1.46744	PP-LFER	5.76578		OECD exp	4	1.69928	0.107717	5	5400	EPI exp.	4	3978.26	0.54938	8	4	B(QSAR)	-	-	-	8.778	OECD exp.	5.37032e-05	Lit exp.
p108-44-1,h621-29-4	Cc1cccc(c1)N	m-toluidine	hydrolysis_product,parent_chemical	107.156	organic	ionizable	5	5	0.707107		5	0	Doc (OECD & lit exp.)	3	B(QSAR)	3	B(QSAR)	0.707107	(M2-3)	(P3-4)	(P3-4)	B	4.69667	Exp (OECD (average))	0.633767	OECD exp.	0.623767	0	lit exp.	5	0.779732	0.0430786	5	15000	EPI exp.	5	35934.3	0.673147	8	3	B(QSAR)	-	-	-	40	OECD exp.	6.78851e-05	EPI exp.
p108-45-2,h2657-85-4	Nc1cccc(c1)N	m-phenylenediamine	hydrolysis_product,parent_chemical	108.144	organic	ionizable	5	Unstable MOC	0.707107		5	0	Swater (OECD & lit exp.)	4	B(QSAR)	1	PT(exp.)	0.707107	(M2-3)	(P3-4)	(P3-4)	B	polyprotic	-	-	-	-0.770658	0.326526	Avg. QSAR	5	-0.770658	0.326526	5	429000	OECD exp.	5	170747	0.794469	8	4	B(QSAR)	-	-	1	0.278597	EPIwin Exp.	5.11183e-08	EPI exp.
p108-46-3,h57583-54-7,h139189-30-3	Oc1cccc(c1)O	resorcinol	hydrolysis_product,parent_chemical	110.113	organic	neutral	Unstable MOC	Unstable MOC	0		5	0	Doc (OECD & lit exp.)	1	B(QSAR)	1	B(QSAR)	0	(M4-5)	(P1-2)	(P1-2)	N	N	-	0.98	OECD exp.	0.04		OECD exp	5	0.483767	0.662623	5	717000	OECD exp.	5	224379	0.841569	8	1	B(QSAR)	-	-	-	0.0285	OECD exp.	1.7666e-09	OECD exp.
p108-55-4	O=C(OC(=O)CCCC(=O)O)CCCC(=O)O	glutaric anhydride	parent_chemical	246.218	organic	ionizable	Unstable MOC	Unstable MOC	0		5	0	Swater (Avg. QSAR)	1	B(QSAR) H(Hydrowin)	1	B(QSAR) H(Hydrowin)	0	(M4-5)	(P1-2)	(P1-2)	A	4.06782	QSAR (SPARC)	-	-	-2.79976	2.41931	Avg. QSAR	5	-5.17263	2.30727	5	5.47131e+10	QSAR avg	5	5.47131e+10	1.40838	8	1	B(QSAR)	1	Hydrowin	-	0.000155295	QSAR avg.	1.25438e-13	QSAR avg.
p108-59-8	COC(=O)CC(=O)OC	dimethyl malonate	parent_chemical	132.117	organic	neutral	Unstable MOC	Unstable MOC	0		5	0	Swater (Avg. QSAR)	1	B(exp)	1	B(exp)	0	(M4-5)	(P1-2)	(P1-2)	N	N	-	-	-	0.0295178	0.109061	Avg. QSAR	5	0.0295178	0.109061	5	148613	QSAR avg	5	148613	0.513122	8	1	B(exp)	2	Hydrowin	-	0.012	OECD exp.	3.68127e-05	QSAR avg.
p108-65-6	COCC(OC(=O)C)C	2-methoxy-1-methylethyl acetate	parent_chemical	132.16	organic	neutral	Unstable MOC	Unstable MOC	0	exp	5	0	Swater (OECD & lit exp.)	1	B(exp) H(OECD exp.)	1	B(exp) H(OECD exp.)	0	(M4-5)	(P1-2)	(P1-2)	N	N	-	-	-	1.2		OECD exp	5	0.534884	0.259318	5	198000	OECD exp.	5	83056.3	0.63844	8	1	B(exp)	1	OECD exp.	-	511.2	OECD exp.	0.000137721	OECD exp.
p108-67-8	Cc1cc(C)cc(c1)C	mesitylene	parent_chemical	120.196	organic	neutral	1	Transient	0.912871		3	0.57735	Doc (OECD & lit exp.)	2	B(QSAR)	1	V(Lit exp.)	0.707107	(M2-3)	(P3-4)	(P3-4)	N	N	-	2.87	OECD exp.	3.61667	0.211266	lit exp.	2	3.5358	0.150345	5	48.2	EPI exp.	3	80.9772	0.736695	8	2	B(QSAR)	-	-	-	320	OECD exp.	0.218776	Lit exp.
p108-68-9	Cc1cc(C)cc(c1)O	3,5-xylenol	parent_chemical	122.168	organic	ionizable	2	2	0.912871		4	0.57735	Doc (PP-LFER)	2	B(QSAR)	2	B(QSAR)	0.707107	(M4-5)	(P3-4)	(P3-4)	A	10.2104	QSAR (SPARC)	1.43717	PP-LFER	2.14153	0	lit exp.	3	2.39387	0.180473	5	4880	EPI exp.	4	4650.74	0.619964	8	2	B(QSAR)	-	-	-	5	OECD exp.	2.51189e-05	Lit exp.
p108-69-0	Cc1cc(C)cc(c1)N	3,5-xylidine	parent_chemical	121.183	organic	ionizable	4.5	4.5	1		4	0.707107	Swater (EPI exp.)	3	B(QSAR)	3	B(QSAR) V(QSAR avg.)	0.707107	(M2-3)	(P3-4)	(P3-4)	B	4.81	Exp (OECD)	-	-	1.57791	0.511004	Avg. QSAR	4	1.2289	0.106623	5	1110	EPI exp.	5	13569.3	0.621622	8	3	B(QSAR)	-	-	-	18.3954	EPIwin Exp.	0.000100559	QSAR avg.
p108-74-7	CN1CN(C)CN(C1)C	hexahydro-1,3,5-trimethyl-1,3,5-triazine	parent_chemical	129.206	organic	ionizable	5	Unstable MOC	0		5	0	Swater (OECD & lit exp.)	4	B(QSAR)	1	V(QSAR avg.)	0	(M2-3)	(P3-4)	(P3-4)	B	9.4941	QSAR (SPARC)	-	-	-1.7653	1.39969	Avg. QSAR	5	-3.96294	2.71866	5	1.06068e+11	OECD exp.	5	9.28092e+11	1.54705	8	4	B(QSAR)	-	-	-	191.084	QSAR avg.	0.00192827	QSAR avg.
p108-77-0	Clc1nc(Cl)nc(n1)Cl	2,4,6-trichloro-1,3,5-triazine	parent_chemical	184.412	organic	neutral	4	4	0.57735		3	0.57735	Doc (OECD & lit exp.)	4	B(QSAR)	4	B(QSAR) V(QSAR avg.)	0	(M4-5)	(P3-4)	(P3-4)	N	N	-	2.6455	OECD exp.	1.90978	0.65561	Avg. QSAR	4	1.90978	0.65561	5	1604.8	QSAR avg	4	1604.8	1.64667	8	4	B(QSAR)	-	-	-	2.35722	QSAR avg.	1.49491e-05	QSAR avg.
p108-78-1,s37640-57-6,s41583-09-9	Nc1nc(N)nc(n1)N	melamine:1,3,5-triazine-2,4,6(1H,3H,5H)-trione, compound with 1,3,5-triazine-2,4,6-triamine (1:1):1,3,5-triazine-2,4,6-triamine phosphate	parent_chemical,salt_or_mixture_component	126.121	organic	ionizable	5	5	0.5		5	0.5	Swater (OECD & lit exp.)	4	B(QSAR)	4	B(QSAR) V(OECD exp.)	0	(M4-5)	(P3-4)	(P1-2)	B	5	Exp (CRC)	-	-	-2.26139		OECD exp	5	-1.82597	0.535218	5	38280	OECD exp.	5	2.13888e+06	1.89422	8	4	B(QSAR)	-	-	-	1.1e-07	OECD exp.	1.60907e-12	OECD exp.
p108-80-5,s37640-57-6	O=c1[nH]c(=O)[nH]c(=O)[nH]1	cyanuric acid:1,3,5-triazine-2,4,6(1H,3H,5H)-trione, compound with 1,3,5-triazine-2,4,6-triamine (1:1)	parent_chemical,salt_or_mixture_component	129.076	organic	neutral	3	3	0.707107		5	0	Swater (OECD & lit exp.)	2	B(QSAR)	2	B(QSAR)	0.707107	(M4-5)	(P1-2)	(P1-2)	N	N	-	-	-	-1.19521	2.55533	Avg. QSAR	5	-1.19521	2.55533	4	26000	OECD exp.	5	74748	1.55031	6	2	B(QSAR)	-	-	-	5.87853e-09	QSAR avg.	3.57419e-13	QSAR avg.
p108-83-8	CC(CC(=O)CC(C)C)C	2,6-dimethylheptan-4-one	parent_chemical	142.243	organic	neutral	1	Transient	0.866025		3	0.5	Doc (OECD & lit exp.)	2	B(QSAR)	1	V(EPI exp.)	0.707107	(M2-3)	(P1-2)	(P1-2)	N	N	-	2.07	OECD exp.	2.82433	0.212834	Avg. QSAR	3	2.82433	0.212834	5	2640	OECD exp.	3	650.143	0.412197	8	2	B(QSAR)	-	-	-	219.945	EPIwin Exp.	0.00478467	EPI exp.
p108-87-2	CC1CCCCC1	methylcyclohexane	parent_chemical	98.1893	organic	neutral	1	Transient	0.912871		3	0.57735	Doc (PP-LFER)	2	B(QSAR)	1	V(Lit exp.)	0.707107	(M2-3)	(P1-2)	(P1-2)	N	N	-	2.89962	PP-LFER	3.61	0	lit exp.	2	3.44098	0.44032	5	14	EPI exp.	3	113.232	1.96987	8	2	B(QSAR)	-	-	-	6180	Lit. Exp.	17.7828	Lit exp.
p108-88-3,h98-87-3,h100-39-0,h100-44-7,h29797-40-8	Cc1ccccc1	toluene	hydrolysis_product,parent_chemical	92.1415	organic	neutral	Unstable MOC	Unstable MOC	0.5		4	0.5	Doc (PP-LFER)	1	B(QSAR)	1	B(QSAR) V(Lit exp.)	0	(M2-3)	(P1-2)	(P1-2)	N	N	-	1.8667	PP-LFER	2.735	0.0412311	lit exp.	3	2.49381	0.110339	5	587	OECD exp.	3	704.505	0.729199	8	1	B(QSAR)	-	-	-	3790	Lit. Exp.	0.223872	Lit exp.
p108-90-7	Clc1ccccc1	chlorobenzene	parent_chemical	112.559	organic	neutral	1	Transient	0		3	0	Doc (OECD & lit exp.)	2	B(QSAR)	1	V(OECD exp.)	0	(M2-3)	(P3-4)	(P3-4)	N	N	-	2.37	OECD exp.	2.88	0.0270801	lit exp.	3	2.6002	0.103251	5	498	EPI exp.	3	535.281	0.598129	8	2	B(QSAR)	-	-	-	1581	OECD exp.	0.127189	OECD exp.
p108-91-8,h538-75-0,h698-90-8,h3173-53-3,h18667-19-1,h32860-09-6,h35877-42-0,h58890-25-8,h860399-11-7	NC1CCCCC1	cyclohexylamine	hydrolysis_product,parent_chemical	99.1769	organic	ionizable	Unstable MOC	Unstable MOC	0	exp	5	0	Doc (OECD & lit exp.)	1	B(exp)	1	B(exp) V(Lit exp.)	0	(M2-3)	(P1-2)	(P1-2)	B	10.64	Exp (CRC)	-3.24	OECD exp.	-5.15		lit exp.	5	-2.62836	2.34047	5	1000000	EPI exp.	5	1.52201e+11	1.23928	8	1	B(exp)	-	-	-	1258.18	OECD exp.	0.00042658	Lit exp.
p108-93-0,h84-61-7,h101-43-9,h542-18-7,h947-19-3,h10305-41-6,h25485-88-5	OC1CCCCC1	cyclohexanol	hydrolysis_product,parent_chemical	100.162	organic	neutral	Unstable MOC	Unstable MOC	0.5		5	0.5	Doc (PP-LFER)	1	B(exp)	1	B(exp)	0	(M4-5)	(P1-2)	(P1-2)	N	N	-	0.56672	PP-LFER	1.23	0	lit exp.	4	1.40608	0.158147	5	37600	OECD exp.	5	22075.3	0.674987	8	1	B(exp)	-	-	-	81.505	OECD exp.	8.76338e-05	OECD exp.
p108-94-1,h100-64-1,h1132-95-2	O=C1CCCCC1	cyclohexanone	hydrolysis_product,parent_chemical	98.1457	organic	neutral	Unstable MOC	Unstable MOC	0.57735	exp	4	0.57735	Doc (OECD & lit exp.)	1	B(exp)	1	B(exp) V(OECD exp.)	0	(M4-5)	(P1-2)	(P1-2)	N	N	-	1.18	OECD exp.	0.81	0	lit exp.	5	1.16788	0.233046	5	25000	EPI exp.	5	20011.1	0.797449	8	1	B(exp)	-	-	-	571	Lit. Exp.	0.000488381	OECD exp.
p108-95-2,h102-09-0,h115-86-6,h122-79-2,h597-82-0,h1241-94-7,h5945-33-5,h7450-69-3,h7526-26-3,h29761-21-5,h57583-54-7,h89392-03-0,h111974-73-3,h1305113-15-8	Oc1ccccc1	phenol	hydrolysis_product,parent_chemical	94.1138	organic	ionizable	Unstable MOC	Unstable MOC	0.57735		5	0.57735	Doc (PP-LFER)	1	B(exp)	1	B(exp)	0	(M4-5)	(P1-2)	(P1-2)	A	9.99	Exp (CRC)	0.551381	PP-LFER	1.16144	0.015	lit exp.	4	1.25238	0.154469	5	82800	EPI exp.	5	62806.4	0.759098	8	1	B(exp)	-	-	-	55	Lit. Exp.	1.41254e-05	Lit exp.
p108-98-5	Sc1ccccc1	benzenethiol	parent_chemical	110.178	organic	ionizable	3	Unstable MOC	0.707107		5	0	Doc (PP-LFER)	2	B(QSAR)	1	V(Lit exp.)	0.707107	(M2-3)	(P1-2)	(P1-2)	A	6.62	Exp (CRC)	-1.44098	PP-LFER	-0.860181		lit exp.	5	0.416597	1.21243	5	835	EPI exp.	5	9.3082e+06	2.38394	8	2	B(QSAR)	-	-	-	257.269	EPIwin Exp.	0.0134896	Lit exp.
p108-99-6	Cc1cccnc1	3-methylpyridine	parent_chemical	93.1291	organic	ionizable	Unstable MOC	Unstable MOC	0		5	0	Doc (PP-LFER)	1	B(exp)	1	B(exp) V(Lit exp.)	0	(M2-3)	(P1-2)	(P1-2)	B	5.65	Exp (OECD)	-1.29708	PP-LFER	-0.459615		OECD exp	5	0.0912846	0.684244	5	1000000	EPI exp.	5	2.73051e+06	1.36643	8	1	B(exp)	-	-	-	1300	Lit. Exp.	0.000316228	Lit exp.
p109-01-3	CN1CCNCC1	1-methylpiperazine	parent_chemical	100.165	organic	ionizable	3	3	0		5	0	Swater (Avg. QSAR)	2	B(QSAR)	2	B(QSAR)	0	(M2-3)	(P3-4)	(P3-4)	B	9.4	Exp (OECD remove ca)	-	-	-5.97		OECD exp	5	-4.32299	1.72101	5	2.81483e+11	QSAR avg	5	2.81483e+11	1.78961	8	2	B(QSAR)	-	-	-	1328.38	QSAR avg.	5.6061e-07	QSAR avg.
p109-02-4	CN1CCOCC1	4-methylmorpholine	parent_chemical	101.149	organic	ionizable	5	5	1.41421		5	0	Doc (OECD & lit exp.)	4	B(QSAR)	4	B(QSAR) V(Lit exp.)	1.41421	(M4-5)	(P3-4)	(P3-4)	B	7.72	Exp (OECD)	-1.14508	OECD exp.	-1.54611	1.45262	Avg. QSAR	5	-3.03414	0.967321	5	1000000	EPI exp.	5	4.62129e+09	1.56808	8	4	B(QSAR)	-	-	-	2192.3	QSAR avg.	2.29087e-05	Lit exp.
p109-09-1	Clc1ccccn1	2-chloropyridine	parent_chemical	113.547	organic	neutral	5	Unstable MOC	0.912871		5	0.57735	Doc (PP-LFER)	3	B(QSAR)	1	V(Lit exp.)	0.707107	(M2-3)	(P3-4)	(P1-2)	N	N	-	0.8249	PP-LFER	1.22		lit exp.	4	1.418	0.183637	5	20000	EPI exp.	5	15353.1	1.26077	8	3	B(QSAR)	-	-	-	291	OECD exp.	0.00060256	Lit exp.
p109-13-7	O=C(C(C)C)OOC(C)(C)C	tert-butyl peroxyisobutyrate	parent_chemical	160.215	organic	neutral	4.5	Unstable MOC	0.707107		4	0	Swater (OECD & lit exp.)	3	B(QSAR)	1	V(QSAR avg.)	0.707107	(M2-3)	(P1-2)	(P1-2)	N	N	-	-	-	2.13025	0.280836	Avg. QSAR	4	2.13025	0.280836	5	3960	OECD exp.	4	1838.74	0.645139	8	3	B(QSAR)	4	OECD exp.	-	384.881	QSAR avg.	0.0431901	QSAR avg.
p109-16-0	O=C(C(=C)C)OCCOCCOCCOC(=O)C(=C)C	2,2'-ethylenedioxydiethyl dimethacrylate	parent_chemical	286.327	organic	neutral	4.5	4.5	1.41421		4	0	Doc (OECD & lit exp.)	3	B(QSAR)	3	B(QSAR)	1.41421	(M4-5)	(P1-2)	(P3-4)	N	N	-	1.54	OECD exp.	1.95439	0.362984	Avg. QSAR	4	1.95439	0.362984	5	3600	OECD exp.	4	6477.67	0.952602	8	3	B(QSAR)	4	Hydrowin	-	0.0659356	QSAR avg.	3.68846e-08	QSAR avg.
p109-43-3	CCCCOC(=O)CCCCCCCCC(=O)OCCCC	dibutyl sebacate	parent_chemical	314.468	organic	neutral	Transient	Transient	0.707107		2	0.707107	Swater (EPI exp.)	1	B(QSAR)	1	B(QSAR)	0	(M1)	(P1-2)	(P1-2)	N	N	-	-	-	5.91831	0.531195	Avg. QSAR	1	5.91831	0.531195	5	40	EPI exp.	2	4.38609	1.59404	8	1	B(QSAR)	4	OECD exp.	-	0.00062377	OECD exp.	1.98339e-06	EPI exp.
p109-52-4,h110-59-8,h638-29-9,h15834-04-5,h36130-02-6,h54605-02-6,h67762-64-5,h83857-96-9,h114798-26-4,h133909-99-6,h137862-53-4,h137863-20-8,h138401-24-8,h151012-31-6,h194984-24-2,h867022-57-9	CCCCC(=O)O	valeric acid	hydrolysis_product,parent_chemical	102.134	organic	ionizable	Unstable MOC	Unstable MOC	0		5	0	Doc (PP-LFER)	1	B(QSAR)	1	B(QSAR)	0	(M4-5)	(P1-2)	(P1-2)	A	4.8	Exp (OECD)	-4.6322	PP-LFER	-3.81	0	lit exp.	5	-2.33423	1.67671	5	5.23018e+09	OECD exp.	5	2.42802e+09	0.80734	8	1	B(QSAR)	-	-	-	24	Lit. Exp.	3.01995e-05	Lit exp.
p109-53-5	C=COCC(C)C	isobutyl vinyl ether	parent_chemical	100.162	organic	neutral	Unstable MOC	Unstable MOC	0.5	exp	4	0.5	Doc (OECD & lit exp.)	1	B(exp)	1	B(exp) V(EPI exp.)	0	(M2-3)	(P1-2)	(P1-2)	N	N	-	1.43	OECD exp.	1.98651	0.45155	Avg. QSAR	4	1.98651	0.45155	5	720	OECD exp.	4	4734.45	0.612372	8	1	B(exp)	-	-	-	7931.35	EPIwin Exp.	0.106735	EPI exp.
p109-54-6	ClCCCN(C)C	3-chloropropyl(dimethyl)amine	parent_chemical	121.611	organic	ionizable	3	Unstable MOC	0		5	0	Swater (EPI exp.)	2	H(LHC QSAR)	1	V(QSAR avg.)	0	(M2-3)	(P3-4)	(P3-4)	B	8.99522	QSAR (SPARC)	-	-	-0.538504	1.87446	Avg. QSAR	5	-2.53659	1.29762	5	77000	EPI exp.	5	4.28728e+09	1.20954	8	3	B(QSAR)	2	LHC QSAR	-	1053.78	QSAR avg.	0.000485757	QSAR avg.
p109-55-7,h3179-80-4,h3845-76-9,h5205-93-6,h5922-69-0,h7651-02-7,h68140-01-2,h149968-48-9,h1379524-06-7	NCCCN(C)C	3-aminopropyldimethylamine	hydrolysis_product,parent_chemical	102.18	organic	ionizable	2	2	0.57735		4	0.57735	Doc (OECD & lit exp.)	2	B(QSAR)	2	B(QSAR)	0	(M2-3)	(P3-4)	(P3-4)	B	polyprotic	-	1.186	OECD exp.	-2.69951	2.82583	Avg. QSAR	5	-2.69951	2.82583	5	1000000	EPI exp.	5	9.63399e+06	2.27138	8	2	B(QSAR)	-	-	-	1333	EPIwin Exp.	3.88131e-07	QSAR avg.
p109-59-1,h19234-20-9	OCCOC(C)C	2-isopropoxyethanol	hydrolysis_product,parent_chemical	104.15	organic	neutral	3	Unstable MOC	0.707107		5	0	Doc (PP-LFER)	2	B(QSAR)	1	V(OECD exp.)	0.707107	(M4-5)	(P1-2)	(P1-2)	N	N	-	-0.72524	PP-LFER	0.04		OECD exp	5	0.284453	0.156253	4	100000	OECD exp.	5	268642	0.908834	8	2	B(QSAR)	-	-	-	645.3	OECD exp.	0.000271265	OECD exp.
p109-60-4	CCCOC(=O)C	propyl acetate	parent_chemical	102.134	organic	neutral	Unstable MOC	Unstable MOC	0		5	0	Doc (PP-LFER)	1	B(exp)	1	B(exp) V(OECD exp.)	0	(M4-5)	(P1-2)	(P1-2)	N	N	-	0.51686	PP-LFER	1.24	0	lit exp.	5	1.1076	0.277373	5	18700	OECD exp.	5	23084.4	0.789136	8	1	B(exp)	4	Hydrowin	-	4026.5	OECD exp.	0.00891596	OECD exp.
p109-61-5	CCCOC(=O)Cl	propyl chloroformate	parent_chemical	122.552	organic	neutral	Unstable MOC	Unstable MOC	0.707107		4	0	Swater (Avg. QSAR)	1	H(LHC QSAR)	1	V(QSAR avg.) H(LHC QSAR)	0.707107	(M4-5)	(P1-2)	(P1-2)	N	N	-	-	-	1.66355	0.334919	Avg. QSAR	4	1.66355	0.334919	5	9311.11	QSAR avg	4	9311.11	0.696598	8	2	B(QSAR)	1	LHC QSAR	-	2666	EPIwin Exp.	0.119899	QSAR avg.
p109-65-9	BrCCCC([2H])([2H])[2H]	1-bromobutane	parent_chemical	137.025	organic	neutral	Unstable MOC	Unstable MOC	0.57735		4	0.57735	Doc (PP-LFER)	1	B(QSAR)	1	B(QSAR) V(Lit exp.)	0	(M2-3)	(P1-2)	(P1-2)	N	N	-	1.9203	PP-LFER	2.675	0.106066	lit exp.	3	2.50195	0.197094	4	869	EPI exp.	4	1797.57	1.30671	6	1	B(QSAR)	2	LHC QSAR	-	5582.01	OECD exp.	0.512861	Lit exp.
p109-66-0	CCCCC	pentane	parent_chemical	72.1511	organic	neutral	Transient	Transient	0.5		3	0.5	Doc (PP-LFER)	1	B(exp)	1	B(exp) V(Lit exp.)	0	(M2-3)	(P1-2)	(P1-2)	N	N	-	2.16308	PP-LFER	3.39	0	lit exp.	3	2.95985	0.348762	5	38.5	OECD exp.	3	421.148	1.92236	8	1	B(exp)	-	-	-	68300	Lit. Exp.	50.1187	Lit exp.
p109-67-1,s25377-72-4	CCCC=C	pent-1-ene:pentene	parent_chemical,salt_or_mixture_component	70.1352	organic	neutral	Unstable MOC	Unstable MOC	0.57735		4	0.57735	Doc (PP-LFER)	1	B(QSAR)	1	B(QSAR) V(Lit exp.)	0	(M2-3)	(P1-2)	(P1-2)	N	N	-	1.73718	PP-LFER	2.8		lit exp.	3	2.61468	0.286059	5	148	EPI exp.	3	729.052	1.62135	8	1	B(QSAR)	-	-	-	84640	OECD exp.	16.9824	Lit exp.
p109-69-3	CCCCCl	1-chlorobutane	parent_chemical	92.5691	organic	neutral	Transient	Transient	0.5	exp	3	0.5	Doc (OECD & lit exp.)	1	B(QSAR) H(OECD exp.)	1	B(QSAR) V(Lit exp.) H(OECD exp.)	0	(M2-3)	(P1-2)	(P1-2)	N	N	-	2.5	OECD exp.	2.64	0	lit exp.	3	2.32983	0.1661	5	110	OECD exp.	4	1139.16	0.575978	8	1	B(QSAR)	1	OECD exp.	-	13700	Lit. Exp.	0.758578	Lit exp.
p109-70-6	ClCCCBr	1-bromo-3-chloropropane	parent_chemical	157.443	organic	neutral	Unstable MOC	Unstable MOC	0		4	0	Swater (EPI exp.)	1	H(LHC QSAR)	1	V(QSAR avg.) H(LHC QSAR)	0	(M2-3)	(P3-4)	(P1-2)	N	N	-	-	-	2.03059	0.3088	Avg. QSAR	4	2.03059	0.3088	5	2240	EPI exp.	4	1820.55	0.789696	8	2	B(QSAR)	1	LHC QSAR	-	853.12	EPIwin Exp.	0.0806856	QSAR avg.
p109-72-8	[Li]CCCC	butyllithium	parent_chemical	64.0551	organo_metallic	neutral	Unstable MOC	Unstable MOC	0		4	0	Swater (Avg. QSAR)	1	B(QSAR) H(LHC QSAR)	1	B(QSAR) H(LHC QSAR)	0	(M2-3)	(P3-4)	(P3-4)	N	N	-	-	-	1.67779	0.408589	Avg. QSAR	4	1.67779	0.408589	4	5345.54	QSAR avg	4	5345.54	0.878737	6	1	B(QSAR)	1	LHC QSAR	-	0.000130634	QSAR avg.	-	-
p109-73-9,h111-36-4,h2594-21-0,h76114-73-3,h77703-56-1,h486455-65-6	CCCCN	butylamine	hydrolysis_product,parent_chemical	73.1388	organic	ionizable	Unstable MOC	Unstable MOC	0	exp	5	0	Doc (OECD & lit exp.)	1	B(exp)	1	B(exp) V(Lit exp.)	0	(M2-3)	(P1-2)	(P1-2)	B	10.6	Exp (CRC)	-4.95	OECD exp.	-5.63	1.35974e-16	lit exp.	5	-3.13505	2.3514	5	1000000	EPI exp.	5	3.28794e+11	1.09845	8	1	B(exp)	-	-	-	12000	OECD exp.	0.000776247	Lit exp.
p109-74-0	CCCC#N	butyronitrile	parent_chemical	69.1069	organic	neutral	Unstable MOC	Unstable MOC	0		5	0	Doc (PP-LFER)	1	B(exp)	1	B(exp) V(Lit exp.)	0	(M4-5)	(P1-2)	(P1-2)	N	N	-	0.13472	PP-LFER	0.53		lit exp.	5	0.875146	0.22484	5	34200	OECD exp.	5	24897.4	0.718486	8	1	B(exp)	4	OECD exp.	-	2580	Lit. Exp.	0.00213796	Lit exp.
p109-75-1	C=CCC#N	but-3-enenitrile	parent_chemical	67.0909	organic	neutral	Unstable MOC	Unstable MOC	0		5	0	Swater (Avg. QSAR)	1	B(QSAR)	1	B(QSAR) V(QSAR avg.)	0	(M2-3)	(P1-2)	(P1-2)	N	N	-	-	-	0.598701	0.166526	Avg. QSAR	5	0.598701	0.166526	5	32415.9	QSAR avg	5	32415.9	0.725826	8	1	B(QSAR)	3	LHC QSAR	-	2466.05	EPIwin Exp.	0.000981204	QSAR avg.
p109-76-2,h1852-17-1	NCCCN	trimethylenediamine	hydrolysis_product,parent_chemical	74.1264	organic	ionizable	Unstable MOC	Unstable MOC	0		5	0	Swater (Avg. QSAR)	1	B(exp)	1	B(exp)	0	(M4-5)	(P1-2)	(P1-2)	B	8.485	Exp (OECD (average))	-	-	-3.56582	2.48387	Avg. QSAR	5	-5.35983	1.59311	5	3.56679e+10	QSAR avg	5	3.56679e+10	1.27323	8	1	B(exp)	-	-	-	580	OECD exp.	3.37835e-08	QSAR avg.
p109-77-3	N#CCC#N	malononitrile	parent_chemical	66.0626	organic	ionizable	Unstable MOC	Unstable MOC	0		5	0	Swater (EPI exp.)	1	B(QSAR)	1	B(QSAR)	0	(M4-5)	(P1-2)	(P1-2)	A	10.8684	QSAR (SPARC)	-	-	-0.808765	0.679308	Avg. QSAR	5	-0.830822	0.683806	5	133000	EPI exp.	5	575400	1.00475	8	1	B(QSAR)	3	LHC QSAR	-	26.66	EPIwin Exp.	5.3572e-06	EPI exp.
p109-78-4	OCCC#N	3-hydroxypropiononitrile	parent_chemical	71.0792	organic	neutral	Unstable MOC	Unstable MOC	0		5	0	Swater (EPI exp.)	1	B(QSAR)	1	B(QSAR)	0	(M4-5)	(P1-2)	(P1-2)	N	N	-	-	-	-0.810681	0.291416	Avg. QSAR	5	-0.810681	0.291416	5	1000000	EPI exp.	5	656479	0.826345	8	1	B(QSAR)	3	LHC QSAR	-	10.6907	EPIwin Exp.	3.0671e-07	EPI exp.
p109-83-1,s21049-70-7	CNCCO	2-methylaminoethanol:2-(methylamino)ethanol, compound with sulphur dioxide	parent_chemical,salt_or_mixture_component	75.1111	organic	ionizable	Unstable MOC	Unstable MOC	0	exp	5	0	Swater (EPI exp.)	1	B(exp)	1	B(exp)	0	(M4-5)	(P1-2)	(P1-2)	B	10.005	Exp (OECD)	-	-	-2.20324	1.26122	Avg. QSAR	5	-4.60525	2.41741	5	1000000	EPI exp.	5	1.08858e+12	1.35269	8	1	B(exp)	-	-	-	143.64	OECD exp.	1.23383e-07	QSAR avg.
p109-86-4,h110-71-4,h111-77-3,h111-96-6,h112-35-6,h112-49-2,h143-24-8,h3121-61-7,h4431-83-8	COCCO	2-methoxyethanol	hydrolysis_product,parent_chemical	76.0959	organic	neutral	3	3	0.707107		5	0	Doc (PP-LFER)	2	B(QSAR)	2	B(QSAR)	0.707107	(M4-5)	(P1-2)	(P1-2)	N	N	-	-1.2782	PP-LFER	-0.77		OECD exp	5	-0.664208	0.159133	5	1000000	EPI exp.	5	778063	0.513434	8	2	B(QSAR)	-	-	-	846	Lit. Exp.	1.09648e-05	Lit exp.
p109-87-5	COCOC	dimethoxymethane	parent_chemical	76.0959	organic	neutral	5	Unstable MOC	1.41421		5	0	Doc (PP-LFER)	4	B(QSAR)	1	V(EPI exp.)	1.41421	(M4-5)	(P1-2)	(P1-2)	N	N	-	-0.36604	PP-LFER	-0.0772705	0.195427	Avg. QSAR	5	-0.0772705	0.195427	5	244000	EPI exp.	5	343057	0.840555	8	4	B(QSAR)	-	-	-	53053.4	EPIwin Exp.	0.00707477	EPI exp.
p109-89-7,h97-77-8,h2235-46-3,h26391-06-0	CCNCC	diethylamine	hydrolysis_product,parent_chemical	73.1388	organic	ionizable	Unstable MOC	Unstable MOC	0	exp	5	0	Doc (OECD & lit exp.)	1	B(exp)	1	B(exp) V(Lit exp.)	0	(M4-5)	(P1-2)	(P1-2)	B	10.84	Exp (CRC)	-5.05	OECD exp.	-6.26	0	lit exp.	5	-3.44161	2.33834	5	1000000	EPI exp.	5	1.23714e+12	1.16204	8	1	B(exp)	-	-	-	31560.5	OECD exp.	0.00102329	Lit exp.
p109-92-2	CCOC=C	ethyl vinyl ether	parent_chemical	72.1076	organic	neutral	3	Unstable MOC	0.866025		5	0.5	Doc (OECD & lit exp.)	2	B(QSAR)	1	V(OECD exp.)	0.707107	(M4-5)	(P1-2)	(P1-2)	N	N	-	0.643	OECD exp.	1.08253	0.464797	Avg. QSAR	5	1.08253	0.464797	5	7800	OECD exp.	5	24259.9	0.612382	8	2	B(QSAR)	4	OECD exp.	-	67000	OECD exp.	0.220377	OECD exp.
p109-99-9,s462-34-0,s14044-65-6	C1CCCO1	tetrahydrofuran:trifluoro(tetrahydrofuran)boron:tetrahydrofuran--borane	parent_chemical,salt_or_mixture_component	72.1076	organic	neutral	2	Unstable MOC	0.912871		4	0.57735	Doc (OECD & lit exp.)	2	B(QSAR)	1	V(Lit exp.)	0.707107	(M4-5)	(P1-2)	(P1-2)	N	N	-	1.3	OECD exp.	0.46		lit exp.	5	0.620249	0.202776	5	1000000	EPI exp.	5	78158.2	0.776276	8	2	B(QSAR)	-	-	-	21585.9	OECD exp.	0.00281838	Lit exp.
p110-00-9	c1ccco1	furan	parent_chemical	68.0757	organic	neutral	Unstable MOC	Unstable MOC	0		5	0	Doc (PP-LFER)	1	B(QSAR)	1	B(QSAR) V(EPI exp.)	0	(M4-5)	(P1-2)	(P1-2)	N	N	-	0.76222	PP-LFER	1.34		lit exp.	5	1.13124	0.156663	5	10000	EPI exp.	5	17627.7	0.693186	8	1	B(QSAR)	-	-	-	82900	OECD exp.	0.220831	EPI exp.
p110-01-0	C1CCCS1	tetrahydrothiophene	parent_chemical	88.1722	organic	neutral	2	Unstable MOC	0.707107		4	0	Swater (OECD & lit exp.)	2	B(QSAR)	1	V(OECD exp.)	0.707107	(M2-3)	(P1-2)	(P1-2)	N	N	-	-	-	1.54776	0.246544	Avg. QSAR	4	1.54776	0.246544	5	5800	OECD exp.	4	4601.73	0.420771	8	2	B(QSAR)	-	-	-	2400	OECD exp.	0.0147261	OECD exp.
p110-02-1	c1cccs1	thiophene	parent_chemical	84.1403	organic	neutral	2	Unstable MOC	0.707107		4	0	Doc (PP-LFER)	2	B(QSAR)	1	V(Lit exp.)	0.707107	(M2-3)	(P3-4)	(P1-2)	N	N	-	1.25186	PP-LFER	1.81		lit exp.	4	1.77844	0.202813	5	3010	EPI exp.	4	3640.07	0.554199	8	2	B(QSAR)	-	-	-	10600	OECD exp.	0.0912011	Lit exp.
p110-03-2	CC(CCC(O)(C)C)(O)C	2,5-dimethylhexane-2,5-diol	parent_chemical	146.231	organic	neutral	5	5	1.41421		5	0	Doc (OECD & lit exp.)	4	B(QSAR)	4	B(QSAR) V(QSAR avg.)	1.41421	(M4-5)	(P1-2)	(P1-2)	N	N	-	0.16	OECD exp.	0.21		OECD exp	5	1.02027	0.318761	5	79313.8	QSAR avg	5	79313.8	1.11155	8	4	B(QSAR)	-	-	-	0.356	OECD exp.	9.85163e-06	QSAR avg.
p110-05-4	CC(OOC(C)(C)C)(C)C	di-tert-butyl peroxide	parent_chemical	146.231	organic	neutral	4	Transient	0.83666	exp	3	0.447214	Doc (OECD & lit exp.)	4	B(QSAR) H(OECD exp.)	1	V(EPI exp.)	0.707107	(M2-3)	(P1-2)	(P1-2)	N	N	-	3	OECD exp.	3.2		OECD exp	3	2.6136	0.616626	5	171	OECD exp.	4	1592.51	1.50091	8	4	B(QSAR)	4	OECD exp.	-	3345.83	EPIwin Exp.	1.97521	EPI exp.
p110-12-3	CC(CCC(=O)C)C	5-methylhexan-2-one	parent_chemical	114.189	organic	neutral	Unstable MOC	Unstable MOC	0	exp	4	0	Swater (EPI exp.)	1	B(exp)	1	B(exp) V(EPI exp.)	0	(M2-3)	(P1-2)	(P1-2)	N	N	-	-	-	1.88		lit exp.	4	1.85506	0.153084	5	5400	EPI exp.	4	4198.99	0.528978	8	1	B(exp)	-	-	-	665	OECD exp.	0.00654314	EPI exp.
p110-15-6,h70-51-9,h106-65-0,h108-30-5,h110-61-2,h123-56-8,h128-08-5,h924-88-9,h2915-57-3,h2921-57-5,h50940-49-3,h74124-79-1,h82911-69-1,h95748-46-2,h103953-71-5,h106410-46-2,h152827-98-0,h402913-84-2,h860035-10-5,h943586-12-7	OC(=O)CCC(=O)O	succinic acid	hydrolysis_product,parent_chemical	118.09	organic	ionizable	Unstable MOC	Unstable MOC	0	exp	5	0	Swater (EPI exp.)	1	B(exp)	1	B(exp)	0	(M4-5)	(P1-2)	(P1-2)	A	4.67	Exp (OECD)	-	-	-3.32596	2.52926	Avg. QSAR	5	-5.45796	1.9773	5	83200	EPI exp.	5	6.47465e+10	1.06502	8	1	B(exp)	-	-	-	2.54603e-05	EPIwin Exp.	1.45994e-11	EPI exp.
p110-16-7,p110-17-8,s85204-10-0,s1192015-20-5,h105-75-9,h108-31-6,h141-02-6,h141-05-9,h142-16-5,h624-48-6,h925-21-3,h941-69-5,h2402-58-6,h10341-03-4,h13676-54-5,h14234-82-3,h53817-61-1,h68610-90-2,h68921-51-7,h68921-52-8,h84583-68-6,h109828-01-5,h133978-15-1	OC(=O)C=CC(=O)O	maleic acid:fumaric acid:2-Butenedioic acid (Z)-, ester with 1,2-propanediol, compd. with 2-(dibutylamino)ethanol:4-benzyl-1-(2-hydroxymethylphenyl)-2-phenylpiperazine-fumarate	hydrolysis_product,parent_chemical,salt_or_mixture_component	116.074	organic	ionizable	Unstable MOC	Unstable MOC	0	exp	5	0	Doc (OECD & lit exp.)	1	B(exp)	1	B(exp)	0	(M4-5)	(P1-2)	(P1-2)	A	1.815	Exp (OECD (average))	-6.555	OECD exp.	-2.6083	2.91755	Avg. QSAR	5	-5.8823	2.69175	5	7000	EPI exp.	5	1.50381e+13	1.31424	8	1	B(exp)	-	-	-	0.00403617	OECD exp.	3.62794e-10	QSAR avg.
p110-19-0	CC(COC(=O)C)C	isobutyl acetate	parent_chemical	116.161	organic	neutral	Unstable MOC	Unstable MOC	0.57735		5	0.57735	Doc (PP-LFER)	1	B(exp)	1	B(exp) V(Lit exp.)	0	(M2-3)	(P1-2)	(P1-2)	N	N	-	0.83214	PP-LFER	1.78		lit exp.	4	1.49146	0.283134	5	5600	OECD exp.	5	10582.4	0.80112	8	1	B(exp)	4	OECD exp.	-	2390	Lit. Exp.	0.0186209	Lit exp.
p110-25-8	CCCCCCCCC=CCCCCCCCC(=O)N(CC(=O)O)C	(Z)-N-methyl-N-(1-oxo-9-octadecenyl)glycine	parent_chemical	353.549	organic	ionizable	Unstable MOC	Unstable MOC	-		5	-	Swater (Avg. QSAR)	1	B(exp)	1	B(exp)	0	(M2-3)	(P3-4)	(P3-4)	A	5	Exp (OECD remove ca)	-	-	4.67009	1.94652	Avg. QSAR	3	2.67009	1.28933	5	360929	QSAR avg	5	360929	2.59599	8	1	B(exp)	-	-	-	0.000197	OECD exp.	1.42982e-08	QSAR avg.
p110-27-0	CCCCCCCCCCCCCC(=O)OC(C)C	isopropyl myristate	parent_chemical	270.458	organic	neutral	Transient	Transient	0.57735	exp	2	0.57735	Doc (OECD & lit exp.)	1	B(exp)	1	B(exp) V(QSAR avg.)	0	(M1)	(P1-2)	(P1-2)	N	N	-	4.455	OECD exp.	6.98682	0.593693	Avg. QSAR	1	6.98682	0.593693	5	0.342717	QSAR avg	2	0.342717	1.50915	8	1	B(exp)	4	OECD exp.	-	0.01246	OECD exp.	0.517161	QSAR avg.
p110-31-6	CCCCCCCC/C=C\CCCCCCCC(=O)NCCNC(=O)CCCCCCC/C=C\CCCCCCCC	N,N'-ethane-1,2-diylbisoleamide	parent_chemical	589.008	organic	ionizable	Transient	Transient	0.912871		1	0.57735	Doc (OECD & lit exp.)	2	B(QSAR)	2	B(QSAR)	0.707107	(M1)	(P3-4)	(P3-4)	A	11.7792	QSAR (SPARC)	5.62284	OECD exp.	12.3921	0.92881	Avg. QSAR	1	12.3892	0.926375	5	0.216106	QSAR avg	2	0.216106	2.5729	8	2	B(QSAR)	-	-	-	3.08983e-16	QSAR avg.	2.35144e-06	QSAR avg.
p110-33-8	CCCCCCOC(=O)CCCCC(=O)OCCCCCC	dihexyl adipate	parent_chemical	314.468	organic	neutral	Transient	Transient	0.707107		2	0.707107	Swater (EPI exp.)	1	B(QSAR)	1	B(QSAR)	0	(M1)	(P1-2)	(P1-2)	N	N	-	-	-	5.92065	0.532645	Avg. QSAR	1	5.92065	0.532645	5	40	EPI exp.	2	4.23503	1.59418	8	1	B(QSAR)	4	OECD exp.	-	0.000384	OECD exp.	1.98339e-06	EPI exp.
p110-41-8	CCCCCCCCCC(C=O)C	2-methylundecanal	parent_chemical	184.324	organic	neutral	Transient	Transient	0	exp	2	0	Doc (OECD & lit exp.)	1	B(exp)	1	B(exp) V(QSAR avg.)	0	(M2-3)	(P1-2)	(P1-2)	N	N	-	3.6	OECD exp.	4.65787	0.163612	Avg. QSAR	2	4.65787	0.163612	5	9.04137	QSAR avg	2	9.04137	0.667063	8	1	B(exp)	-	-	-	101.432	QSAR avg.	0.0729246	QSAR avg.
p110-42-9	CCCCCCCCCC(=O)OC	methyl decanoate	parent_chemical	186.296	organic	neutral	Transient	Transient	0		2	0	Swater (EPI exp.)	1	B(QSAR)	1	B(QSAR) V(EPI exp.)	0	(M2-3)	(P1-2)	(P1-2)	N	N	-	-	-	4.41		lit exp.	2	4.16916	0.340672	5	4.4	EPI exp.	2	30.6345	0.87545	8	1	B(QSAR)	4	OECD exp.	-	4.93	OECD exp.	0.0842429	EPI exp.
p110-43-0	CCCCCC(=O)C	heptan-2-one	parent_chemical	114.189	organic	neutral	Unstable MOC	Unstable MOC	0	exp	4	0	Doc (OECD & lit exp.)	1	B(exp)	1	B(exp) V(OECD exp.)	0	(M2-3)	(P1-2)	(P1-2)	N	N	-	1.45	OECD exp.	1.98	0	lit exp.	4	2.01036	0.190716	5	4210	OECD exp.	4	2669.15	0.368416	8	1	B(exp)	-	-	-	918	OECD exp.	0.0100498	OECD exp.
p110-44-1	CC=CC=CC(=O)O	hexa-2,4-dienoic acid	parent_chemical	112.129	organic	ionizable	Unstable MOC	Unstable MOC	0	exp	5	0	Doc (OECD & lit exp.)	1	B(exp)	1	B(exp)	0	(M4-5)	(P1-2)	(P1-2)	A	4.65	Exp (OECD (average))	-7.17	OECD exp.	0.0484453	1.70456	Avg. QSAR	5	-2.09156	1.54236	5	1910	EPI exp.	5	1.50103e+09	1.07344	8	1	B(exp)	4	OECD exp.	-	2.45267	QSAR avg.	2.0544e-05	QSAR avg.
p110-53-2	CCCCCBr	1-bromopentane	parent_chemical	151.052	organic	neutral	Transient	Transient	0		3	0	Doc (PP-LFER)	1	B(QSAR)	1	B(QSAR) V(Lit exp.)	0	(M2-3)	(P1-2)	(P1-2)	N	N	-	2.36274	PP-LFER	3.37	0	lit exp.	3	2.99178	0.209388	5	127	EPI exp.	3	287.999	0.621407	8	1	B(QSAR)	2	LHC QSAR	-	1680	Lit. Exp.	0.851138	Lit exp.
p110-54-3	CCCCCC	n-hexane	parent_chemical	86.1782	organic	neutral	Transient	Transient	0.57735		3	0.57735	Doc (PP-LFER)	1	B(QSAR)	1	B(QSAR) V(Lit exp.)	0	(M2-3)	(P1-2)	(P1-2)	N	N	-	2.60552	PP-LFER	4		OECD exp	2	3.46255	0.405587	5	9.5	EPI exp.	3	146.721	1.81327	8	1	B(QSAR)	-	-	-	20200	Lit. Exp.	66.0693	Lit exp.
p110-59-8	CCCCC#N	valeronitrile	parent_chemical	83.1339	organic	neutral	Unstable MOC	Unstable MOC	0.57735		5	0.57735	Doc (PP-LFER)	1	B(QSAR)	1	B(QSAR) V(Lit exp.)	0	(M2-3)	(P1-2)	(P1-2)	N	N	-	0.60632	PP-LFER	1.12		lit exp.	4	1.361	0.218985	5	8528.39	QSAR avg	4	8528.39	0.652687	8	1	B(QSAR)	3	LHC QSAR	-	964	Lit. Exp.	0.00263027	Lit exp.
p110-60-1	NCCCCN	tetramethylenediamine	parent_chemical	88.1534	organic	ionizable	Unstable MOC	Unstable MOC	0		5	0	Swater (Avg. QSAR)	1	B(exp)	1	B(exp)	0	(M4-5)	(P1-2)	(P1-2)	B	polyprotic	-	-	-	-3.07745	2.53607	Avg. QSAR	5	-3.07745	2.53607	5	8.90798e+06	QSAR avg	5	8.90798e+06	2.25685	8	1	B(exp)	-	-	-	445	OECD exp.	4.25612e-08	QSAR avg.
p110-61-2	N#CCCC#N	succinonitrile	parent_chemical	80.0897	organic	neutral	Unstable MOC	Unstable MOC	0		5	0	Doc (PP-LFER)	1	B(QSAR)	1	B(QSAR)	0	(M4-5)	(P1-2)	(P1-2)	N	N	-	-0.75228	PP-LFER	-0.407954	0.352042	Avg. QSAR	5	-0.407954	0.352042	5	126900	OECD exp.	5	268520	1.07381	8	1	B(QSAR)	3	LHC QSAR	-	1.03707	EPIwin Exp.	2.64179e-07	EPI exp.
p110-62-3	CCCCC=O	valeraldehyde	parent_chemical	86.1346	organic	neutral	Unstable MOC	Unstable MOC	0.5		5	0.5	Doc (PP-LFER)	1	B(QSAR)	1	B(QSAR) V(Lit exp.)	0	(M2-3)	(P1-2)	(P1-2)	N	N	-	0.41434	PP-LFER	1.28071	0.114859	Avg. QSAR	4	1.28071	0.114859	5	18200	OECD exp.	5	14503.9	0.513071	8	1	B(QSAR)	-	-	-	4580	Lit. Exp.	0.0060256	Lit exp.
p110-63-4,h505-65-7,h2082-81-7,h2425-79-8,h2478-10-6,h7300-34-7,h52408-42-1,h69788-75-6,h82530-64-1,h297132-04-8,h850348-10-6	OCCCCO	butane-1,4-diol	hydrolysis_product,parent_chemical	90.1229	organic	neutral	Unstable MOC	Unstable MOC	0	exp	5	0	Doc (OECD & lit exp.)	1	B(exp)	1	B(exp)	0	(M4-5)	(P1-2)	(P1-2)	N	N	-	-0.15	OECD exp.	-0.88		OECD exp	5	-0.555967	0.305968	5	1000000	OECD exp.	5	666220	0.759666	8	1	B(exp)	-	-	-	1.65	OECD exp.	2.0181e-05	OECD exp.
p110-64-5,h821-06-7,h5417-35-6,h25260-60-0	OCC=CCO	but-2-ene-1,4-diol	hydrolysis_product,parent_chemical	88.107	organic	neutral	Unstable MOC	Unstable MOC	0		5	0	Doc (OECD & lit exp.)	1	B(QSAR)	1	B(QSAR)	0	(M4-5)	(P1-2)	(P1-2)	N	N	-	-0.15	OECD exp.	-0.9		OECD exp	5	-0.647823	0.233583	5	619000	OECD exp.	5	615062	0.948696	8	1	B(QSAR)	-	-	-	3.515	OECD exp.	2.01938e-07	OECD exp.
p110-65-6,s960404-59-5,h32167-31-0	OCC#CCO	but-2-yne-1,4-diol:Solvate of (2S,3R,4S,5S,6R)-2-(4-chloro-3-(4-ethoxybenzyl)phenyl)-6-(hydroxymethyl)-2-methoxytetrahydro-2H-pyran-3,4,5-triol with 2-butyne-1, 4-diol (1:1)_x000D_	hydrolysis_product,parent_chemical,salt_or_mixture_component	86.091	organic	neutral	Unstable MOC	Unstable MOC	0	exp	5	0	Doc (OECD & lit exp.)	1	B(exp)	1	B(exp)	0	(M4-5)	(P1-2)	(P1-2)	N	N	-	-0.15	OECD exp.	-0.73		OECD exp	5	-0.817772	0.315129	5	20000	OECD exp.	5	559478	0.861667	8	1	B(exp)	-	-	-	0.0741148	EPIwin Exp.	3.27053e-07	QSAR avg.
p110-71-4	COCCOC	1,2-dimethoxyethane	parent_chemical	90.1229	organic	neutral	5	5	1.41421		5	0	Doc (PP-LFER)	4	B(QSAR)	3	V(PP-LFER)	1.41421	(M4-5)	(P1-2)	(P1-2)	N	N	-	-0.52664	PP-LFER	0.0718975	0.282964	Avg. QSAR	5	0.0718975	0.282964	5	1000000	EPI exp.	5	354043	0.917817	8	4	B(QSAR)	-	-	-	8925	OECD exp.	0.000118739	PP-LFER
p110-73-6	OCCNCC	2-ethylaminoethanol	parent_chemical	89.1382	organic	ionizable	Unstable MOC	Unstable MOC	0		5	0	Swater (Avg. QSAR)	1	B(exp)	1	B(exp)	0	(M4-5)	(P1-2)	(P1-2)	B	10.2301	QSAR (SPARC)	-	-	-1.81453	1.3062	Avg. QSAR	5	-4.30655	2.47575	5	1.38203e+12	QSAR avg	5	1.38203e+12	1.25107	8	1	B(exp)	-	-	-	70	OECD exp.	1.45162e-07	QSAR avg.
p110-76-9,h139007-06-0	NCCOCC	2-ethoxyethylamine	hydrolysis_product,parent_chemical	89.1382	organic	ionizable	3	3	0.912871		5	0.57735	Swater (Avg. QSAR)	2	B(QSAR)	2	B(QSAR)	0.707107	(M4-5)	(P1-2)	(P1-2)	B	9.3313	QSAR (SPARC)	-	-	-3.8313		OECD exp	5	-3.57865	1.88928	5	2.22494e+11	QSAR avg	5	2.22494e+11	1.71411	8	2	B(QSAR)	-	-	-	3760.69	QSAR avg.	1.43628e-05	QSAR avg.
p110-77-0	OCCSCC	2-(ethylthio)ethanol	parent_chemical	106.187	organic	neutral	Unstable MOC	Unstable MOC	0		5	0	Swater (Avg. QSAR)	1	B(QSAR)	1	B(QSAR)	0	(M4-5)	(P1-2)	(P1-2)	N	N	-	-	-	0.632758	0.181228	Avg. QSAR	5	0.632758	0.181228	5	50576.5	QSAR avg	5	50576.5	0.589024	8	1	B(QSAR)	-	-	-	41.5541	QSAR avg.	1.25069e-05	QSAR avg.
p110-80-5,h111-90-0,h112-15-2,h112-36-7,h112-50-5,h39670-09-2,h922165-31-9,h1419401-88-9	OCCOCC	2-ethoxyethanol	hydrolysis_product,parent_chemical	90.1229	organic	neutral	Unstable MOC	Unstable MOC	0		5	0	Doc (PP-LFER)	1	B(exp)	1	B(exp)	0	(M4-5)	(P1-2)	(P1-2)	N	N	-	-0.9001	PP-LFER	-0.1		lit exp.	5	-0.228495	0.133819	5	1000000	EPI exp.	5	489377	0.648751	8	1	B(exp)	-	-	-	751	OECD exp.	1.23027e-05	Lit exp.
p110-82-7	C1CCCCC1	cyclohexane	parent_chemical	84.1622	organic	neutral	Transient	Transient	0	exp	3	0	Doc (OECD & lit exp.)	1	B(exp)	1	B(exp) V(Lit exp.)	0	(M2-3)	(P1-2)	(P1-2)	N	N	-	2.89	OECD exp.	3.44	0	lit exp.	3	3.07374	0.367775	5	52	OECD exp.	3	157.374	1.57442	8	1	B(exp)	-	-	-	13000	Lit. Exp.	7.94328	Lit exp.
p110-83-8	C1CCC=CC1	cyclohexene	parent_chemical	82.1463	organic	neutral	Transient	Transient	0		3	0	Doc (PP-LFER)	1	B(QSAR)	1	B(QSAR) V(OECD exp.)	0	(M2-3)	(P1-2)	(P1-2)	N	N	-	2.08374	PP-LFER	2.99		OECD exp	3	2.68738	0.356474	5	160	OECD exp.	3	417.277	1.08565	8	1	B(QSAR)	-	-	-	11900	OECD exp.	2.46598	OECD exp.
p110-85-0,s142-88-1,h57260-71-6,h70918-00-2	N1CCNCC1	piperazine:piperazine adipate	hydrolysis_product,parent_chemical,salt_or_mixture_component	86.1375	organic	ionizable	Unstable MOC	Unstable MOC	0		5	0	Swater (EPI exp.)	1	B(QSAR)	1	B(QSAR)	0	(M4-5)	(P1-2)	(P1-2)	B	polyprotic	-	-	-	-2.66881	1.72385	Avg. QSAR	5	-2.66881	1.72385	5	1000000	EPI exp.	5	1.40208e+07	2.39796	8	1	B(QSAR)	-	-	-	21.328	EPIwin Exp.	7.79479e-08	QSAR avg.
p110-86-1,s26412-87-3,s54981-42-9	c1cccnc1	pyridine:sulphur trioxide--pyridine (1:1):2-acetamido-5-chlorobenzenesulfonic acid;pyridine	parent_chemical,salt_or_mixture_component	79.102	organic	ionizable	3	Unstable MOC	0.707107		5	0	Doc (PP-LFER)	2	B(QSAR)	1	V(Lit exp.)	0.707107	(M2-3)	(P1-2)	(P1-2)	B	5.23	Exp (CRC)	-1.35297	PP-LFER	-0.604849		lit exp.	5	-0.234223	0.580281	5	1000000	EPI exp.	5	3.09726e+06	1.51962	8	2	B(QSAR)	-	-	-	2760	Lit. Exp.	0.000363078	Lit exp.
p110-87-2	O1CCC=CC1	3,4-dihydro-2H-pyran	parent_chemical	84.1187	organic	neutral	4.5	Unstable MOC	1.51658		4	0.547723	Doc (OECD & lit exp.)	3	B(QSAR)	1	V(OECD exp.)	1.41421	(M4-5)	(P1-2)	(P1-2)	N	N	-	1.3	OECD exp.	1.6		OECD exp	5	0.811696	0.237462	5	7700	OECD exp.	5	40053.6	0.839761	8	3	B(QSAR)	-	-	-	10040	OECD exp.	0.04427	OECD exp.
p110-88-3	O1COCOC1	1,3,5-trioxane	parent_chemical	90.0793	organic	neutral	5	Unstable MOC	1.41421	exp	5	0	Doc (OECD & lit exp.)	4	B(QSAR) H(OECD exp.)	1	V(QSAR avg.)	1.41421	(M4-5)	(P1-2)	(P1-2)	N	N	-	-0.416	OECD exp.	-0.616481	0.552838	Avg. QSAR	5	-0.616481	0.552838	5	172000	OECD exp.	5	998991	1.78314	8	4	B(QSAR)	4	OECD exp.	-	2332.75	EPIwin Exp.	0.0225013	QSAR avg.
p110-89-4	C1CCCNC1	piperidine	parent_chemical	85.1499	organic	ionizable	Unstable MOC	Unstable MOC	0	exp	5	0	Doc (OECD & lit exp.)	1	B(exp)	1	B(exp)	0	(M2-3)	(P1-2)	(P1-2)	B	11.123	Exp (Liao et al (2009))	-5.34623	OECD exp.	-0.49318	1.64759	Avg. QSAR	5	-3.34238	2.53034	5	1000000	EPI exp.	5	2.0766e+12	1.27022	8	1	B(exp)	-	-	-	2702	OECD exp.	0.000182033	OECD exp.
p110-91-8,h1696-20-4,h4394-85-8	C1CNCCO1	morpholine	hydrolysis_product,parent_chemical	87.1222	organic	ionizable	Unstable MOC	Unstable MOC	0	exp	5	0	Doc (OECD & lit exp.)	1	B(exp)	1	B(exp) PT(exp.)	0	(M4-5)	(P1-2)	(P1-2)	B	8.49	Exp (OECD)	-3.27661	OECD exp.	-1.78794	1.22901	Avg. QSAR	5	-3.58395	1.60726	5	1000000	EPI exp.	5	3.10923e+10	1.73514	8	1	B(exp)	-	-	1	1340	Lit. Exp.	5.49541e-06	Lit exp.
p110-93-0	CCCCCCC=C=O	6-methylhept-5-en-2-one	parent_chemical	126.2	organic	neutral	Unstable MOC	Unstable MOC	0.57735	exp	4	0.57735	Swater (OECD & lit exp.)	1	B(exp) H(LHC QSAR)	1	B(exp) H(LHC QSAR)	0	(M2-3)	(P1-2)	(P1-2)	N	N	-	-	-	2.77878	0.485932	Avg. QSAR	3	2.77878	0.485932	4	3020	OECD exp.	3	388.186	0.850794	6	1	B(exp)	1	LHC QSAR	-	2346.08	QSAR avg.	-	-
p110-95-2	CN(CCCN(C)C)C	N,N,N',N'-tetramethyltrimethylenediamine	parent_chemical	130.235	organic	ionizable	5	5	0		5	0	Doc (OECD & lit exp.)	4	B(QSAR)	4	B(QSAR) V(QSAR avg.)	0	(M2-3)	(P3-4)	(P3-4)	B	9.78089	QSAR (SPARC)	-3.73089	OECD exp.	-2.00399	3.13251	Avg. QSAR	5	-4.31634	1.66123	5	3.0083e+11	QSAR avg	5	3.0083e+11	1.35477	8	4	B(QSAR)	-	-	-	566.648	QSAR avg.	6.64419e-06	QSAR avg.
p110-97-4,h57843-53-5	CC(CNCC(O)C)O	1,1'-iminodipropan-2-ol	hydrolysis_product,parent_chemical	133.192	organic	ionizable	Unstable MOC	Unstable MOC	0	exp	5	0	Doc (OECD & lit exp.)	1	B(exp)	1	B(exp)	0	(M4-5)	(P1-2)	(P1-2)	B	9.00333	Exp (OECD (average))	-4.34084	OECD exp.	-7.70334		OECD exp	5	-4.11279	2.16029	5	860000	EPI exp.	5	1.61485e+11	1.64588	8	1	B(exp)	-	-	-	0.0166625	EPIwin Exp.	9.87611e-10	QSAR avg.
p111-01-3	CC(CCCC(CCCC(C)C)C)CCCCC(CCCC(CCCC(C)C)C)C	2,6,10,15,19,23-hexamethyltetracosane	parent_chemical	422.827	organic	neutral	Transient	Transient	0	exp	1	0	Doc (OECD & lit exp.)	1	B(exp)	1	B(exp) V(QSAR avg.)	0	(M1)	(P1-2)	(P1-2)	N	N	-	5.63	OECD exp.	5.49		OECD exp	1	13.9141	2.09903	5	2.39197e-05	QSAR avg	1	2.39197e-05	2.05502	8	1	B(exp)	-	-	-	1.9e-08	OECD exp.	402260	QSAR avg.
p111-02-4	CC(=CCCC=C(CCC=C(CCC=C(C)C)C)C)CCC=C(CCC=C(C)C)C	2,6,10,15,19,23-hexamethyltetracosa-2,6,10,14,18,22-hexaene	parent_chemical	410.731	organic	neutral	Immobile POC	Transient	0		1	0	Doc (OECD & lit exp.)	4	B(QSAR)	1	V(QSAR avg.)	0	(M1)	(P1-2)	(P1-2)	N	N	-	8.003	OECD exp.	12.384	2.03626	Avg. QSAR	1	12.384	2.03626	5	0.000520682	QSAR avg	1	0.000520682	2.48538	8	4	B(QSAR)	-	-	-	7.61273e-05	QSAR avg.	4845.52	QSAR avg.
p111-05-7	CCCCCCCC/C=C\CCCCCCCC(=O)NCC(O)C	N-(2-hydroxypropyl)oleamide	parent_chemical	339.565	organic	neutral	Transient	Transient	1	exp	3	1	Doc (OECD & lit exp.)	1	B(exp)	1	B(exp)	0	(M2-3)	(P1-2)	(P1-2)	N	N	-	2.93	OECD exp.	6.28685	0.228711	Avg. QSAR	1	6.28685	0.228711	5	4.28159	QSAR avg	2	4.28159	2.39009	8	1	B(exp)	-	-	-	2.42e-06	OECD exp.	6.77695e-09	QSAR avg.
p111-11-5	CCCCCCCC(=O)OC	methyl octanoate	parent_chemical	158.242	organic	neutral	Transient	Transient	0		3	0	Swater (EPI exp.)	1	B(QSAR)	1	B(QSAR) V(OECD exp.)	0	(M2-3)	(P1-2)	(P1-2)	N	N	-	-	-	3.18402	0.259095	Avg. QSAR	3	3.18402	0.259095	5	64.4	EPI exp.	3	228.647	0.536286	8	1	B(QSAR)	4	OECD exp.	-	71.995	OECD exp.	0.0320223	OECD exp.
p111-14-8,h78-16-0,h142-19-8,h620-67-7,h2528-61-2,h25811-35-2,h67762-64-5,h68855-18-5	CCCCCCC(=O)O	heptanoic acid	hydrolysis_product,parent_chemical	130.188	organic	ionizable	Unstable MOC	Unstable MOC	0		5	0	Doc (PP-LFER)	1	B(exp)	1	B(exp)	0	(M4-5)	(P1-2)	(P1-2)	A	4.69667	Exp (OECD (average))	-3.97892	PP-LFER	0.741262	1.65867	Avg. QSAR	5	-1.38007	1.61568	5	2820	EPI exp.	5	3.69238e+08	0.777609	8	1	B(exp)	-	-	-	2.201	OECD exp.	2.65815e-05	EPI exp.
p111-17-1,h123-28-4,h693-36-7	OC(=O)CCSCCC(=O)O	3,3'-thiodi(propionic acid)	hydrolysis_product,parent_chemical	178.208	organic	ionizable	Unstable MOC	Unstable MOC	0	exp	5	0	Swater (EPI exp.)	1	B(exp)	1	B(exp)	0	(M4-5)	(P1-2)	(P1-2)	A	4.03	Exp (OECD remove ca)	-	-	-2.51255	2.5374	Avg. QSAR	5	-4.90055	2.13895	5	37200	EPI exp.	5	6.96288e+10	1.35699	8	1	B(exp)	-	-	-	0.00444	OECD exp.	5.50297e-12	QSAR avg.
p111-18-2	CN(CCCCCCN(C)C)C	N,N,N',N'-tetramethylhexamethylenediamine	parent_chemical	172.316	organic	ionizable	5	5	0		5	0	Doc (OECD & lit exp.)	4	B(QSAR)	4	B(QSAR) V(QSAR avg.)	0	(M2-3)	(P3-4)	(P3-4)	B	9.86264	QSAR (SPARC)	-3.19014	OECD exp.	-0.589643	3.45384	Avg. QSAR	5	-2.9347	1.74632	5	1.24676e+10	QSAR avg	5	1.24676e+10	1.70269	8	4	B(QSAR)	-	-	-	24.75	OECD exp.	3.17233e-05	QSAR avg.
p111-20-6,h106-79-6,h109-43-3,h122-62-3,h7491-02-3,h28473-19-0,h52829-07-9,h122586-52-1,h129757-67-1	OC(=O)CCCCCCCCC(=O)O	sebacic acid	hydrolysis_product,parent_chemical	202.252	organic	ionizable	Transient	Transient	0		3	0	Swater (EPI exp.)	1	B(QSAR)	1	B(QSAR)	0	(M4-5)	(P1-2)	(P1-2)	A	5	Exp (OECD)	-	-	-0.523317	2.81715	Avg. QSAR	5	-2.52332	1.63062	5	1000	EPI exp.	5	1.51876e+08	1.88086	8	1	B(QSAR)	-	-	-	8.2e-06	OECD exp.	4.79414e-10	QSAR avg.
p111-21-7	CC(=O)OCCOCCOCCOC(=O)C	2,2'-[ethane-1,2-diylbis(oxy)]bisethyl diacetate	parent_chemical	234.251	organic	neutral	Unstable MOC	Unstable MOC	0	exp	5	0	Swater (OECD & lit exp.)	1	B(exp)	1	B(exp)	0	(M4-5)	(P1-2)	(P1-2)	N	N	-	-	-	0.03		OECD exp	5	0.00736097	0.50544	5	1000000	OECD exp.	5	198311	1.0789	8	1	B(exp)	4	OECD exp.	-	0.312852	QSAR avg.	1.64346e-08	QSAR avg.
p111-25-1	CCCCCCBr	1-bromohexane	parent_chemical	165.079	organic	neutral	Transient	Transient	0.57735		3	0.57735	Doc (PP-LFER)	1	B(QSAR)	1	B(QSAR) V(Lit exp.)	0	(M2-3)	(P1-2)	(P1-2)	N	N	-	2.8122	PP-LFER	3.8		lit exp.	2	3.48375	0.24876	5	25.7	EPI exp.	3	99.8175	0.805185	8	1	B(QSAR)	2	LHC QSAR	-	519.87	EPIwin Exp.	1.34896	Lit exp.
p111-27-3,h110-33-8,h111-25-1,h112-25-4,h112-59-4,h142-92-7,h544-10-5,h6259-76-3,h10305-38-1,h34316-64-8,h68511-03-5,h68515-51-5,h211915-06-9,h302776-68-7	CCCCCCO	hexan-1-ol	hydrolysis_product,parent_chemical	102.178	organic	neutral	Unstable MOC	Unstable MOC	0		4	0	Doc (PP-LFER)	1	B(exp)	1	B(exp) V(OECD exp.)	0	(M2-3)	(P1-2)	(P1-2)	N	N	-	1.0148	PP-LFER	2.03	0	lit exp.	4	1.89645	0.188907	5	1300	OECD exp.	4	6152.09	0.413223	8	1	B(exp)	-	-	-	105.125	OECD exp.	0.00333496	OECD exp.
p111-29-5	OCCCCCO	pentane-1,5-diol	parent_chemical	104.15	organic	neutral	Unstable MOC	Unstable MOC	0	exp	5	0	Swater (OECD & lit exp.)	1	B(exp)	1	B(exp)	0	(M4-5)	(P1-2)	(P1-2)	N	N	-	-	OECD exp.	-0.0566302	0.275774	Avg. QSAR	5	-0.0566302	0.275774	5	1000000	OECD exp.	5	311284	0.9398	8	1	B(exp)	-	-	4	0.51987	EPIwin Exp.	4.18219e-06	QSAR avg.
p111-30-8	O=CCCCC=O	glutaral	parent_chemical	100.118	organic	neutral	Unstable MOC	Unstable MOC	0	exp	5	0	Doc (OECD & lit exp.)	1	B(exp)	1	B(exp)	0	(M4-5)	(P1-2)	(P1-2)	N	N	-	0.76	OECD exp.	-0.0348276	0.180756	Avg. QSAR	5	-0.0348276	0.180756	5	382257	QSAR avg	5	382257	1.03682	8	1	B(exp)	4	OECD exp.	2	79.98	EPIwin Exp.	3.98252e-06	QSAR avg.
p111-36-4	CCCCN=C=O	butyl isocyanate	parent_chemical	99.1333	organic	ionizable	Unstable MOC	Unstable MOC	0		5	0	Swater (Avg. QSAR)	1	B(QSAR) H(LHC QSAR)	1	B(QSAR) V(QSAR avg.) H(LHC QSAR)	0	(M4-5)	(P3-4)	(P1-2)	B	8.92	QSAR (avg.)	-	-	1.30021	0.717696	Avg. QSAR	5	-0.667791	2.28213	5	6.75606e+08	QSAR avg	5	6.75606e+08	1.85453	8	1	B(QSAR)	1	LHC QSAR	-	2381.5	OECD exp.	0.045548	QSAR avg.
p111-40-0,h10595-60-5	NCCNCCN	2,2'-iminodi(ethylamine)	hydrolysis_product,parent_chemical	103.168	organic	ionizable	Transient	Transient	1.87083	exp	2	1.73205	Doc (OECD & lit exp.)	2	B(exp)	2	B(exp)	0.707107	(M4-5)	(P1-2)	(P1-2)	B	polyprotic	-	4	OECD exp.	-4.74062	2.8247	Avg. QSAR	5	-4.74062	2.8247	5	1000000	EPI exp.	5	1.80009e+07	2.36917	8	2	B(exp)	-	-	-	30.723	OECD exp.	6.56483e-11	QSAR avg.
p111-41-1,h95-38-5,h106-09-2,h3699-54-5,h86261-90-7	NCCNCCO	2-(2-aminoethylamino)ethanol	hydrolysis_product,parent_chemical	104.153	organic	ionizable	Unstable MOC	Unstable MOC	0	exp	5	0	Doc (OECD & lit exp.)	1	B(exp)	1	B(exp)	0	(M4-5)	(P1-2)	(P1-2)	B	polyprotic	-	0.547	OECD exp.	-3.84353	2.21594	Avg. QSAR	5	-3.84353	2.21594	5	1000000	EPI exp.	5	2.0833e+07	2.34566	8	1	B(exp)	-	-	-	1.09	OECD exp.	7.02914e-11	QSAR avg.
p111-42-2,h120-40-1,h3356-88-5,h6334-25-4,h68155-07-7,h90622-74-5,h1215841-86-3	OCCNCCO	2,2'-iminodiethanol	hydrolysis_product,parent_chemical	105.138	organic	ionizable	Unstable MOC	Unstable MOC	0	exp	5	0	Doc (OECD & lit exp.)	1	B(exp)	1	B(exp)	0	(M4-5)	(P1-2)	(P1-2)	B	8.99	Exp (OECD)	-4.68553	OECD exp.	-7.45		OECD exp	5	-4.93931	2.11829	5	1000000	EPI exp.	5	2.52182e+11	1.48408	8	1	B(exp)	-	-	-	0.045485	OECD exp.	1.58262e-09	EPI exp.
p111-44-4	ClCCOCCCl	bis(2-chloroethyl) ether	parent_chemical	143.014	organic	neutral	3	Unstable MOC	0.707107		5	0	Swater (EPI exp.)	2	H(LHC QSAR)	1	V(EPI exp.)	0.707107	(M4-5)	(P3-4)	(P1-2)	N	N	-	-	-	1.46572	0.0744907	Avg. QSAR	4	1.46572	0.0744907	5	17200	EPI exp.	4	8241.01	0.390605	8	4	B(QSAR)	2	LHC QSAR	-	206.615	EPIwin Exp.	0.000695209	EPI exp.
p111-46-6,h51-03-6,h94-28-0,h109-16-0,h111-21-7,h111-44-4,h111-77-3,h111-90-0,h111-96-6,h112-15-2,h112-27-6,h112-33-4,h112-34-5,h112-35-6,h112-36-7,h112-49-2,h112-50-5,h112-59-4,h112-60-7,h112-73-2,h120-55-8,h124-17-4,h141-17-3,h142-22-3,h143-22-6,h143-24-8,h143-29-3,h628-89-7,h4246-51-9,h6607-34-7,h7328-22-5,h9003-13-8,h20566-35-2,h30599-15-6,h36443-68-2,h39670-09-2,h50586-59-9,h65520-46-9,h6645…	OCCOCCO	2,2'-oxydiethanol	hydrolysis_product,parent_chemical	106.122	organic	neutral	Unstable MOC	Unstable MOC	0	exp	5	0	Swater (EPI exp.)	1	B(exp)	1	B(exp)	0	(M4-5)	(P1-2)	(P1-2)	N	N	-	-	OECD exp.	-1.30939	0.174915	Avg. QSAR	5	-1.30939	0.174915	5	1000000	EPI exp.	5	1.6808e+06	1.21833	8	1	B(exp)	-	-	-	0.8	OECD exp.	3.10848e-08	QSAR avg.
p111-48-8,h41484-35-9	OCCSCCO	thiodiglycol	hydrolysis_product,parent_chemical	122.187	organic	neutral	Unstable MOC	Unstable MOC	0	exp	5	0	Doc (OECD & lit exp.)	1	B(exp)	1	B(exp) PT(exp.)	0	(M4-5)	(P1-2)	(P1-2)	N	N	-	1	OECD exp.	-0.513005	0.15165	Avg. QSAR	5	-0.513005	0.15165	5	1000000	EPI exp.	5	494057	1.21478	8	1	B(exp)	-	-	1	0.430559	EPIwin Exp.	2.90577e-08	QSAR avg.
p111-49-9	C1CCCCNC1	perhydroazepine	parent_chemical	99.1769	organic	ionizable	Unstable MOC	Unstable MOC	0		5	0	Swater (EPI exp.)	1	B(QSAR)	1	B(QSAR)	0	(M2-3)	(P1-2)	(P1-2)	B	10.8712	QSAR (SPARC)	-	-	0.0108241	1.69868	Avg. QSAR	5	-2.73765	2.34645	5	170000	EPI exp.	5	4.01548e+11	1.68447	8	1	B(QSAR)	-	-	-	1197	OECD exp.	0.000251093	EPI exp.
p111-55-7	CC(=O)OCCOC(=O)C	ethylene di(acetate)	parent_chemical	146.144	organic	neutral	Unstable MOC	Unstable MOC	0		5	0	Swater (OECD & lit exp.)	1	B(QSAR)	1	B(QSAR)	0	(M4-5)	(P1-2)	(P1-2)	N	N	-	-	-	0.134012	0.400666	Avg. QSAR	5	0.134012	0.400666	5	171100	OECD exp.	5	74774.1	0.49573	8	1	B(QSAR)	4	OECD exp.	-	10.32	OECD exp.	3.55782e-06	OECD exp.
p111-57-9	CCCCCCCCCCCCCCCCCC(=O)NCCO	N-(2-hydroxyethyl)stearamide	parent_chemical	327.554	organic	neutral	Transient	Transient	0.707107		2	0.707107	Swater (Avg. QSAR)	1	B(exp)	1	B(exp)	0	(M1)	(P1-2)	(P1-2)	N	N	-	-	-	6.23803	0.249949	Avg. QSAR	1	6.23803	0.249949	5	4.36565	QSAR avg	2	4.36565	2.43889	8	1	B(exp)	-	-	-	4.561e-07	OECD exp.	5.96126e-09	QSAR avg.
p111-64-8	CCCCCCCC(=O)Cl	octanoyl chloride	parent_chemical	162.661	organic	neutral	Unstable MOC	Unstable MOC	1		4	1	Doc (OECD & lit exp.)	1	B(QSAR) H(LHC QSAR)	1	B(QSAR) H(LHC QSAR)	0	(M4-5)	(P1-2)	(P1-2)	N	N	-	1.772	OECD exp.	3.24858	0.514665	Avg. QSAR	2	3.24858	0.514665	5	205.101	QSAR avg	3	205.101	1.00852	8	1	B(QSAR)	1	LHC QSAR	-	85	OECD exp.	3.64873e-05	OECD exp.
p111-65-9	CCCCCCCC	octane	parent_chemical	114.232	organic	neutral	Transient	Transient	0.57735		3	0.57735	Doc (OECD & lit exp.)	1	B(QSAR)	1	B(QSAR) V(Lit exp.)	0	(M2-3)	(P1-2)	(P1-2)	N	N	-	2.64	OECD exp.	5.17	0.0173205	lit exp.	2	4.46777	0.514072	5	0.66	EPI exp.	2	17.7496	1.57893	8	1	B(QSAR)	-	-	-	1860	Lit. Exp.	128.825	Lit exp.
p111-66-0,s25377-83-7	CCCCCCC=C	oct-1-ene:octene	parent_chemical,salt_or_mixture_component	112.216	organic	neutral	Transient	Transient	0.5	exp	1	0.5	Doc (OECD & lit exp.)	1	B(exp)	1	B(exp) V(OECD exp.)	0	(M2-3)	(P1-2)	(P1-2)	N	N	-	5.63	OECD exp.	4.57	0	lit exp.	2	4.13491	0.467105	5	47	OECD exp.	2	33.3165	1.44072	8	1	B(exp)	-	-	-	3655.43	OECD exp.	3.52266	OECD exp.
p111-69-3	N#CCCCCC#N	adiponitrile	parent_chemical	108.144	organic	neutral	3	3	0.707107		5	0	Doc (PP-LFER)	2	B(QSAR)	2	B(QSAR)	0.707107	(M2-3)	(P1-2)	(P1-2)	N	N	-	-0.29018	PP-LFER	0.471031	0.416077	Avg. QSAR	5	0.471031	0.416077	5	80000	EPI exp.	5	60117.5	1.23385	8	2	B(QSAR)	4	OECD exp.	-	0.0905107	EPIwin Exp.	4.94825e-08	EPI exp.
p111-70-6	CCCCCCCO	heptan-1-ol	parent_chemical	116.205	organic	neutral	Unstable MOC	Unstable MOC	0.447214	exp	4	0.447214	Doc (OECD & lit exp.)	1	B(exp)	1	B(exp) V(OECD exp.)	0	(M2-3)	(P1-2)	(P1-2)	N	N	-	1.66	OECD exp.	2.2		OECD exp	3	2.40443	0.236197	5	1740	OECD exp.	4	2088.52	0.598327	8	1	B(exp)	-	-	-	100	OECD exp.	0.00269555	OECD exp.
p111-71-7	CCCCCCC=O	heptanal	parent_chemical	114.189	organic	neutral	Unstable MOC	Unstable MOC	0.5		4	0.5	Doc (PP-LFER)	1	B(exp)	1	B(exp) V(OECD exp.)	0	(M2-3)	(P1-2)	(P1-2)	N	N	-	1.3003	PP-LFER	2.26305	0.133967	Avg. QSAR	3	2.26305	0.133967	5	2030	OECD exp.	4	1554.37	0.397313	8	1	B(exp)	-	-	-	660	OECD exp.	0.0149846	OECD exp.
p111-75-1,h87787-67-5	CCCCNCCO	2-butylaminoethanol	hydrolysis_product,parent_chemical	117.192	organic	ionizable	Unstable MOC	Unstable MOC	0	exp	5	0	Swater (EPI exp.)	1	B(exp)	1	B(exp)	0	(M2-3)	(P1-2)	(P1-2)	B	9.71	Exp (OECD (average))	-	-	-0.883892	1.3228	Avg. QSAR	5	-3.16789	2.18217	5	1000000	EPI exp.	5	1.55017e+11	1.2455	8	1	B(exp)	-	-	-	7.68547	QSAR avg.	1.7163e-07	QSAR avg.
p111-76-2,h51-03-6,h78-51-3,h112-07-2,h112-34-5,h112-73-2,h124-17-4,h141-17-3,h141-18-4,h143-22-6,h143-29-3,h7328-22-5,h9003-13-8,h65520-46-9	CCCCOCCO	2-butoxyethanol	hydrolysis_product,parent_chemical	118.177	organic	neutral	Unstable MOC	Unstable MOC	0		5	0	Doc (PP-LFER)	1	B(exp)	1	B(exp)	0	(M4-5)	(P1-2)	(P1-2)	N	N	-	-0.02776	PP-LFER	0.77		OECD exp	5	0.797946	0.221957	5	1000000	EPI exp.	5	63316.6	0.714031	8	1	B(exp)	-	-	-	117.04	OECD exp.	7.54771e-05	OECD exp.
p111-77-3,h111-96-6,h112-35-6,h112-49-2,h143-24-8	COCCOCCO	2-(2-methoxyethoxy)ethanol	hydrolysis_product,parent_chemical	120.149	organic	neutral	Unstable MOC	Unstable MOC	0	exp	5	0	Swater (EPI exp.)	1	B(exp)	1	B(exp)	0	(M4-5)	(P1-2)	(P1-2)	N	N	-	-	-	-0.47		OECD exp	5	-0.721953	0.256249	5	1000000	EPI exp.	5	1.09168e+06	0.985763	8	1	B(exp)	-	-	-	33.325	EPIwin Exp.	1.3874e-07	QSAR avg.
p111-78-4	C1CCC=CC=CC1	cycloocta-1,5-diene	parent_chemical	108.184	organic	neutral	Transient	Transient	0.912871		2	0.57735	Swater (OECD & lit exp.)	2	B(QSAR)	1	V(QSAR avg.)	0.707107	(M2-3)	(P1-2)	(P1-2)	N	N	-	-	-	3.16		lit exp.	2	3.24772	0.438442	5	50	OECD exp.	3	180.847	0.841748	8	2	B(QSAR)	-	-	-	1102.42	QSAR avg.	2.57417	QSAR avg.
p111-81-9	C=CCCCCCCCCC(=O)OC	methyl undec-10-enoate	parent_chemical	198.307	organic	neutral	Transient	Transient	0.57735		3	0.57735	Doc (OECD & lit exp.)	1	B(QSAR)	1	B(QSAR) V(QSAR avg.)	0	(M2-3)	(P1-2)	(P1-2)	N	N	-	2.6	OECD exp.	4.30121	0.392306	Avg. QSAR	2	4.30121	0.392306	5	23.825	QSAR avg	2	23.825	1.25328	8	1	B(QSAR)	4	Hydrowin	-	210	OECD exp.	0.0507831	QSAR avg.
p111-82-0	CCCCCCCCCCCC(=O)OC	methyl laurate	parent_chemical	214.35	organic	neutral	Transient	Transient	0.707107		2	0.707107	Swater (Avg. QSAR)	1	B(exp)	1	B(exp) V(QSAR avg.)	0	(M2-3)	(P1-2)	(P1-2)	N	N	-	-	-	5.13989	0.410382	Avg. QSAR	1	5.13989	0.410382	5	5.11466	QSAR avg	2	5.11466	1.32236	8	1	B(exp)	4	OECD exp.	-	0.55	OECD exp.	0.115442	QSAR avg.
p111-83-1	CCCCCCCCBr	1-bromooctane	parent_chemical	193.133	organic	neutral	Transient	Transient	0		2	0	Doc (PP-LFER)	1	B(QSAR)	1	B(QSAR) V(Lit exp.)	0	(M2-3)	(P1-2)	(P1-2)	N	N	-	3.6204	PP-LFER	4.89		lit exp.	2	4.46496	0.330214	5	1.67	EPI exp.	2	13.2874	1.33636	8	1	B(QSAR)	2	LHC QSAR	-	50.9206	EPIwin Exp.	2.39883	Lit exp.
p111-84-2	CCCCCCCCC	nonane	parent_chemical	128.259	organic	neutral	Transient	Transient	1		3	1	Doc (OECD & lit exp.)	1	B(QSAR)	1	B(QSAR) V(Lit exp.)	0	(M2-3)	(P1-2)	(P1-2)	N	N	-	2.9	OECD exp.	5.65		lit exp.	1	4.96351	0.559047	5	0.22	EPI exp.	2	6.3828	1.50191	8	1	B(QSAR)	-	-	-	570	Lit. Exp.	167.88	Lit exp.
p111-85-3	CCCCCCCCCl	1-chlorooctane	parent_chemical	148.677	organic	neutral	Transient	Transient	0		2	0	Doc (OECD & lit exp.)	1	B(QSAR)	1	B(QSAR) V(EPI exp.)	0	(M2-3)	(P1-2)	(P1-2)	N	N	-	3.5	OECD exp.	4.73		lit exp.	2	4.28896	0.294657	5	4.89	EPI exp.	2	17.6383	0.994164	8	1	B(QSAR)	2	LHC QSAR	-	126	OECD exp.	1.554	EPI exp.
p111-86-4	CCCCCCCCN	octylamine	parent_chemical	129.247	organic	ionizable	Unstable MOC	Unstable MOC	1		5	1	Doc (OECD & lit exp.)	1	B(QSAR)	1	B(QSAR) V(OECD exp.)	0	(M2-3)	(P1-2)	(P1-2)	B	10.65	Exp (CRC)	-3.08094	OECD exp.	-3.56		lit exp.	5	-1.43548	2.38163	5	1.42939e+09	OECD exp.	5	6.13493e+09	0.966841	8	1	B(QSAR)	-	-	-	120	OECD exp.	0.0195625	OECD exp.
p111-87-5,h89-04-3,h103-23-1,h111-83-1,h111-85-3,h117-81-7,h629-82-3,h2306-88-9,h3319-31-1,h6422-86-2,h66423-13-0,h68307-94-8,h71662-46-9,h122586-52-1	CCCCCCCCO	octan-1-ol	hydrolysis_product,parent_chemical	130.232	organic	neutral	Unstable MOC	Unstable MOC	0.5		4	0.5	Doc (PP-LFER)	1	B(exp)	1	B(exp) V(OECD exp.)	0	(M2-3)	(P1-2)	(P1-2)	N	N	-	1.89806	PP-LFER	3.0175	0.035	lit exp.	3	2.90073	0.266109	5	107	OECD exp.	3	776.212	0.845161	8	1	B(exp)	-	-	-	10.0167	OECD exp.	0.00492073	OECD exp.
p111-88-6	CCCCCCCCS	octane-1-thiol	parent_chemical	146.296	organic	ionizable	Transient	Transient	0.707107		3	0.707107	Swater (Avg. QSAR)	1	B(QSAR)	1	B(QSAR) V(QSAR avg.)	0	(M2-3)	(P1-2)	(P1-2)	A	9.9631	QSAR (SPARC)	-	-	3.93974	0.245655	Avg. QSAR	2	3.81179	0.11119	5	213.555	QSAR avg	3	213.555	1.74367	8	1	B(QSAR)	-	-	-	56.6525	EPIwin Exp.	0.693252	QSAR avg.
p111-90-0,h112-15-2,h112-36-7,h112-50-5,h39670-09-2,h922165-31-9	OCCOCCOCC	2-(2-ethoxyethoxy)ethanol	hydrolysis_product,parent_chemical	134.176	organic	neutral	Unstable MOC	Unstable MOC	0		5	0	Doc (PP-LFER)	1	B(exp)	1	B(exp)	0	(M4-5)	(P1-2)	(P1-2)	N	N	-	-1.2344	PP-LFER	-0.29545	0.244005	Avg. QSAR	5	-0.29545	0.244005	5	1000000	EPI exp.	5	569894	0.703562	8	1	B(exp)	-	-	-	16.7958	EPIwin Exp.	2.51189e-07	Lit exp.
p111-91-1	ClCCOCOCCCl	bis(2-chloroethoxy)methane	parent_chemical	173.04	organic	neutral	2	2	0		4	0	Doc (OECD & lit exp.)	2	H(LHC QSAR)	2	V(EPI exp.) H(LHC QSAR)	0	(M4-5)	(P3-4)	(P1-2)	N	N	-	1.85	OECD exp.	1.6		OECD exp	4	1.31094	0.204919	5	8710	OECD exp.	4	9818.8	0.680519	8	4	B(QSAR)	2	LHC QSAR	-	17.5956	EPIwin Exp.	0.000157444	EPI exp.
p111-92-2,h761-65-9,h4559-86-8,h5343-44-2,h5831-80-1	CCCCNCCCC	dibutylamine	hydrolysis_product,parent_chemical	129.247	organic	ionizable	Unstable MOC	Unstable MOC	1	exp	5	1	Doc (OECD & lit exp.)	1	B(exp)	1	B(exp) V(OECD exp.)	0	(M2-3)	(P1-2)	(P1-2)	B	11.25	Exp (CRC)	-3.935	OECD exp.	-4.42		OECD exp	5	-1.85669	2.59286	5	3500	EPI exp.	5	3.8357e+10	1.05028	8	1	B(exp)	-	-	-	341	Lit. Exp.	0.000399585	OECD exp.
p111-96-6	COCCOCCOC	bis(2-methoxyethyl) ether	parent_chemical	134.176	organic	neutral	5	5	1.41421		5	0	Swater (OECD & lit exp.)	4	B(QSAR)	4	B(QSAR) V(OECD exp.)	1.41421	(M4-5)	(P1-2)	(P1-2)	N	N	-	-	-	-0.42		OECD exp	5	0.0543228	0.524713	5	940000	OECD exp.	5	369089	0.926309	8	4	B(QSAR)	-	-	-	99	OECD exp.	5.70371e-06	OECD exp.
p112-05-0,h59587-44-9	CCCCCCCCC(=O)O	nonanoic acid	hydrolysis_product,parent_chemical	158.242	organic	ionizable	Unstable MOC	Unstable MOC	1	exp	5	1	Doc (OECD & lit exp.)	1	B(exp)	1	B(exp)	0	(M2-3)	(P1-2)	(P1-2)	A	4.96	Exp (CRC)	-2.535	OECD exp.	1.72304	1.75309	Avg. QSAR	5	-0.292957	1.39679	5	3.28946e+07	OECD exp.	5	2.66631e+07	1.11553	8	1	B(exp)	-	-	-	0.219945	EPIwin Exp.	6.62493e-05	EPI exp.
p112-07-2	CCCCOCCOC(=O)C	2-butoxyethyl acetate	parent_chemical	160.215	organic	neutral	Unstable MOC	Unstable MOC	0	exp	4	0	Swater (EPI exp.)	1	B(exp)	1	B(exp)	0	(M2-3)	(P1-2)	(P1-2)	N	N	-	-	-	1.51		OECD exp	4	1.5214	0.308062	5	9000	EPI exp.	4	9131.31	0.646579	8	1	B(exp)	4	Hydrowin	-	49.9875	EPIwin Exp.	0.000223285	EPI exp.
p112-11-8	CCCCCCCC/C=C\CCCCCCCC(=O)OC(C)C	isopropyl oleate	parent_chemical	324.551	organic	neutral	Transient	Transient	0		1	0	Swater (Avg. QSAR)	1	B(exp)	1	B(exp) V(QSAR avg.)	0	(M1)	(P1-2)	(P1-2)	N	N	-	-	-	5.79		OECD exp	1	8.47107	0.663189	5	0.0746429	QSAR avg	1	0.0746429	1.71656	8	1	B(exp)	4	OECD exp.	-	0.000855961	QSAR avg.	0.740574	QSAR avg.
p112-13-0	CCCCCCCCCC(=O)Cl	decanoyl chloride	parent_chemical	190.715	organic	neutral	Transient	Transient	0		2	0	Swater (Avg. QSAR)	1	B(QSAR) H(LHC QSAR)	1	B(QSAR) V(QSAR avg.) H(LHC QSAR)	0	(M2-3)	(P1-2)	(P1-2)	N	N	-	-	-	4.22147	0.532354	Avg. QSAR	2	4.22147	0.532354	5	23.886	QSAR avg	2	23.886	0.934313	8	1	B(QSAR)	1	LHC QSAR	-	3530.2	QSAR avg.	0.270948	QSAR avg.
p112-15-2	CCOCCOCCOC(=O)C	2-(2-ethoxyethoxy)ethyl acetate	parent_chemical	176.214	organic	neutral	Unstable MOC	Unstable MOC	0	exp	5	0	Swater (OECD & lit exp.)	1	B(exp)	1	B(exp)	0	(M4-5)	(P1-2)	(P1-2)	N	N	-	-	-	0.74		OECD exp	5	0.456803	0.371225	5	1000000	OECD exp.	5	98297.7	0.745108	8	1	B(exp)	4	OECD exp.	-	13.1834	EPIwin Exp.	9.36487e-07	EPI exp.
p112-16-3	CCCCCCCCCCCC(=O)Cl	lauroyl chloride	parent_chemical	218.769	organic	neutral	Transient	Transient	0.707107		2	0.707107	Swater (Avg. QSAR)	1	B(QSAR) H(LHC QSAR)	1	B(QSAR) V(QSAR avg.) H(LHC QSAR)	0	(M2-3)	(P1-2)	(P1-2)	N	N	-	-	-	5.18314	0.554885	Avg. QSAR	1	5.18314	0.554885	5	3.16188	QSAR avg	2	3.16188	1.03078	8	1	B(QSAR)	1	LHC QSAR	-	0.73	OECD exp.	0.425949	QSAR avg.
p112-18-5	CCCCCCCCCCCCN(C)C	dodecyldimethylamine	parent_chemical	213.409	organic	ionizable	Unstable MOC	Unstable MOC	0.707107		5	0.707107	Swater (Avg. QSAR)	1	B(exp)	1	B(exp) V(QSAR avg.)	0	(M1)	(P3-4)	(P3-4)	B	7.50156	QSAR (SPARC)	-	-	3.60006	1.94233	Avg. QSAR	4	2.19938	0.882163	5	15259.8	QSAR avg	5	15259.8	0.766003	8	1	B(exp)	-	-	-	1.31775	QSAR avg.	0.0808335	QSAR avg.
p112-25-4,h112-59-4	CCCCCCOCCO	2-hexyloxyethanol	hydrolysis_product,parent_chemical	146.231	organic	neutral	Unstable MOC	Unstable MOC	0	exp	4	0	Swater (EPI exp.)	1	B(exp)	1	B(exp)	0	(M2-3)	(P1-2)	(P1-2)	N	N	-	-	-	1.77505	0.311605	Avg. QSAR	4	1.77505	0.311605	5	9900	EPI exp.	4	7648.87	0.843643	8	1	B(exp)	-	-	-	20.6615	EPIwin Exp.	0.000127591	EPI exp.
p112-27-6,h94-28-0,h109-16-0,h111-21-7,h112-35-6,h112-49-2,h112-50-5,h112-60-7,h143-22-6,h143-24-8,h9003-13-8,h36443-68-2,h39670-09-2,h50586-59-9,h65520-46-9,h66455-14-9,h68213-23-0,h68439-46-3,h68439-50-9,h69011-36-5,h109828-01-5	OCCOCCOCCO	2,2'-(ethylenedioxy)diethanol	hydrolysis_product,parent_chemical	150.176	organic	neutral	Unstable MOC	Unstable MOC	0	exp	5	0	Doc (OECD & lit exp.)	1	B(exp)	1	B(exp)	0	(M4-5)	(P1-2)	(P1-2)	N	N	-	1	OECD exp.	-1.36855	0.223088	Avg. QSAR	5	-1.36855	0.223088	5	1000000	EPI exp.	5	2.11479e+06	1.55235	8	1	B(exp)	-	-	-	0.18	OECD exp.	5.40707e-10	QSAR avg.
p112-29-8	CCCCCCCCCCBr	1-bromodecane	parent_chemical	221.187	organic	neutral	Transient	Transient	0.707107		2	0.707107	Swater (Avg. QSAR)	1	B(exp)	1	B(exp) V(QSAR avg.)	0	(M2-3)	(P3-4)	(P1-2)	N	N	-	-	-	6		lit exp.	1	5.44098	0.406537	5	2.15426	QSAR avg	2	2.15426	1.80698	8	1	B(exp)	2	LHC QSAR	-	5.332	EPIwin Exp.	3.54176	QSAR avg.
p112-30-1,h112-29-8,h1330-61-6,h3179-47-3,h3687-46-5,h68439-46-3,h68610-90-2	CCCCCCCCCCO	decan-1-ol	hydrolysis_product,parent_chemical	158.286	organic	neutral	Transient	Transient	0.57735		3	0.57735	Doc (PP-LFER)	1	B(exp)	1	B(exp) V(OECD exp.)	0	(M2-3)	(P1-2)	(P1-2)	N	N	-	2.78012	PP-LFER	4.57	0	lit exp.	2	3.88004	0.330877	5	21.1	OECD exp.	3	106.226	1.61085	8	1	B(exp)	-	-	-	0.7815	OECD exp.	0.00236626	OECD exp.
p112-31-2	CCCCCCCCCC=O	decanal	parent_chemical	156.27	organic	neutral	Transient	Transient	0.57735		3	0.57735	Doc (OECD & lit exp.)	1	B(QSAR)	1	B(QSAR) V(EPI exp.)	0	(M2-3)	(P1-2)	(P1-2)	N	N	-	2.9	OECD exp.	3.72994	0.203967	Avg. QSAR	2	3.72994	0.203967	5	60.6718	QSAR avg	3	60.6718	0.590763	8	1	B(QSAR)	-	-	-	13.7299	EPIwin Exp.	0.0736103	EPI exp.
p112-33-4,h4246-51-9	NCCCOCCOCCO	2-[2-(3-aminopropoxy)ethoxy]ethanol	hydrolysis_product,parent_chemical	163.218	organic	ionizable	5	5	1.41421		5	0	Doc (OECD & lit exp.)	3	B(QSAR)	3	B(QSAR)	1.41421	(M4-5)	(P1-2)	(P1-2)	B	9.82143	QSAR (SPARC)	-5.5861	OECD exp.	-2.29296	1.40391	Avg. QSAR	5	-4.62153	2.28314	5	1.03418e+12	QSAR avg	5	1.03418e+12	1.29033	8	3	B(QSAR)	-	-	-	0.045	OECD exp.	1.30753e-10	QSAR avg.
p112-34-5,h51-03-6,h112-73-2,h124-17-4,h141-17-3,h143-22-6,h143-29-3,h7328-22-5,h9003-13-8,h65520-46-9	CCCCOCCOCCO	2-(2-butoxyethoxy)ethanol	hydrolysis_product,parent_chemical	162.23	organic	neutral	Unstable MOC	Unstable MOC	0		5	0	Doc (PP-LFER)	1	B(exp)	1	B(exp)	0	(M4-5)	(P1-2)	(P1-2)	N	N	-	-0.2796	PP-LFER	1		OECD exp	5	0.704646	0.301998	5	1000000	EPI exp.	5	100105	1.13604	8	1	B(exp)	-	-	-	2.91927	EPIwin Exp.	6.30957e-07	Lit exp.
p112-35-6,h112-49-2,h143-24-8	COCCOCCOCCO	2-(2-(2-methoxyethoxy)ethoxy)ethanol	hydrolysis_product,parent_chemical	164.203	organic	neutral	Unstable MOC	Unstable MOC	0	exp	5	0	Swater (EPI exp.)	1	B(exp)	1	B(exp)	0	(M4-5)	(P1-2)	(P1-2)	N	N	-	-	-	-1.12		OECD exp	5	-0.791271	0.385277	5	1000000	EPI exp.	5	1.31582e+06	1.0792	8	1	B(exp)	-	-	-	0.560211	QSAR avg.	4.0797e-09	QSAR avg.
p112-36-7	CCOCCOCCOCC	bis(2-ethoxyethyl) ether	parent_chemical	162.23	organic	neutral	5	5	0.707107		5	0	Swater (EPI exp.)	4	B(QSAR)	4	B(QSAR) V(EPI exp.)	0.707107	(M4-5)	(P1-2)	(P1-2)	N	N	-	-	-	0.752019	0.334367	Avg. QSAR	5	0.752019	0.334367	5	1000000	EPI exp.	5	91895.8	0.992149	8	4	B(QSAR)	-	-	-	69.4493	EPIwin Exp.	4.5393e-06	EPI exp.
p112-38-9,h111-81-9,h54301-26-7,h420805-16-9	C=CCCCCCCCCC(=O)O	undec-10-enoic acid	hydrolysis_product,parent_chemical	184.28	organic	ionizable	Unstable MOC	Unstable MOC	1	exp	5	1	Doc (OECD & lit exp.)	1	B(exp)	1	B(exp)	0	(M2-3)	(P1-2)	(P1-2)	A	4.9	Exp (OECD (average))	-2.26	OECD exp.	2.29875	1.83765	Avg. QSAR	5	0.258751	1.35521	5	6.49611e+06	OECD exp.	5	9.95506e+06	1.75942	8	1	B(exp)	-	-	-	0.124902	EPIwin Exp.	0.00010596	QSAR avg.
p112-39-0	CCCCCCCCCCCCCCCC(=O)OC	methyl palmitate	parent_chemical	270.458	organic	neutral	Transient	Transient	0.707107		2	0.707107	Swater (Avg. QSAR)	1	B(QSAR)	1	B(QSAR) V(QSAR avg.)	0	(M1)	(P1-2)	(P1-2)	N	N	-	-	-	7.04205	0.500265	Avg. QSAR	1	7.04205	0.500265	5	0.287946	QSAR avg	2	0.287946	1.71296	8	1	B(QSAR)	4	OECD exp.	-	0.007085	OECD exp.	0.362228	QSAR avg.
p112-40-3	CCCCCCCCCCCC	dodecane	parent_chemical	170.34	organic	neutral	Transient	Transient	0.57735		1	0.57735	Doc (PP-LFER)	1	B(exp)	1	B(exp) V(Lit exp.)	0	(M1)	(P1-2)	(P1-2)	N	N	-	5.25464	PP-LFER	6.8		lit exp.	1	6.44154	0.682729	5	0.0037	EPI exp.	2	0.391601	1.76063	8	1	B(exp)	-	-	-	20	OECD exp.	338.844	Lit exp.
p112-41-4,s25378-22-7	CCCCCCCCCCC=C	dodec-1-ene:dodecene	parent_chemical,salt_or_mixture_component	168.324	organic	neutral	Transient	Transient	0.57735	exp	1	0.57735	Doc (OECD & lit exp.)	1	B(exp)	1	B(exp) V(OECD exp.)	0	(M1)	(P1-2)	(P1-2)	N	N	-	5.63	OECD exp.	6.13653	0.68526	Avg. QSAR	1	6.13653	0.68526	5	47	OECD exp.	2	0.793638	1.87775	8	1	B(exp)	-	-	-	3655.43	OECD exp.	5.28399	OECD exp.
p112-42-5,h3648-20-2	CCCCCCCCCCCO	undecan-1-ol	hydrolysis_product,parent_chemical	172.313	organic	neutral	Transient	Transient	0		2	0	Swater (Avg. QSAR)	1	B(QSAR)	1	B(QSAR) V(QSAR avg.)	0	(M2-3)	(P1-2)	(P1-2)	N	N	-	-	-	4.72		lit exp.	2	4.36446	0.360381	5	49.4193	QSAR avg	2	49.4193	1.66752	8	1	B(QSAR)	-	-	-	0.39	OECD exp.	0.00351019	QSAR avg.
p112-44-7	CCCCCCCCCCC=O	undecanal	parent_chemical	170.297	organic	neutral	Transient	Transient	0.57735	exp	3	0.57735	Swater (OECD & lit exp.)	1	B(exp)	1	B(exp) V(OECD exp.)	0	(M2-3)	(P1-2)	(P1-2)	N	N	-	-	-	4.21579	0.232374	Avg. QSAR	2	4.21579	0.232374	5	120	OECD exp.	2	22.0603	0.808878	8	1	B(exp)	-	-	-	48	OECD exp.	0.0274941	OECD exp.
p112-45-8	C=CCCCCCCCCC=O	undec-10-enal	parent_chemical	168.281	organic	neutral	Transient	Transient	0.57735	exp	3	0.57735	Doc (OECD & lit exp.)	1	B(exp)	1	B(exp) V(QSAR avg.)	0	(M2-3)	(P1-2)	(P1-2)	N	N	-	3	OECD exp.	3.85085	0.287236	Avg. QSAR	2	3.85085	0.287236	5	250	OECD exp.	2	39.2534	1.03262	8	1	B(exp)	-	-	-	9.96425	QSAR avg.	0.0220016	QSAR avg.
p112-49-2	COCCOCCOCCOC	1,2-bis(2-methoxyethoxy)ethane	parent_chemical	178.23	organic	neutral	5	5	0.707107		5	0	Swater (OECD & lit exp.)	4	B(QSAR)	4	B(QSAR) V(OECD exp.)	0.707107	(M4-5)	(P1-2)	(P3-4)	N	N	-	-	-	-0.52		OECD exp	5	0.00341774	0.726389	5	1000000	OECD exp.	5	424374	0.833432	8	4	B(QSAR)	-	-	-	4.5	OECD exp.	3.23718e-07	OECD exp.
p112-50-5,h39670-09-2	OCCOCCOCCOCC	2-(2-(2-ethoxyethoxy)ethoxy)ethanol	hydrolysis_product,parent_chemical	178.23	organic	neutral	Unstable MOC	Unstable MOC	0	exp	5	0	Swater (EPI exp.)	1	B(exp)	1	B(exp)	0	(M4-5)	(P1-2)	(P1-2)	N	N	-	-	-	-0.368983	0.372393	Avg. QSAR	5	-0.368983	0.372393	5	1000000	EPI exp.	5	724077	0.784332	8	1	B(exp)	-	-	-	1.83008	OECD exp.	5.27651e-09	QSAR avg.
p112-53-8,h123-28-4,h142-90-5,h2156-97-0,h2402-58-6,h6195-20-6,h9002-92-0,h36078-10-1,h63727-39-9,h66455-14-9,h68131-39-5,h68411-27-8,h68439-50-9,h93686-48-7,h97808-97-4	CCCCCCCCCCCCO	dodecan-1-ol	hydrolysis_product,parent_chemical	186.34	organic	neutral	Transient	Transient	0.57735	exp	2	0.57735	Doc (OECD & lit exp.)	1	B(exp)	1	B(exp) V(EPI exp.)	0	(M2-3)	(P1-2)	(P1-2)	N	N	-	4.25	OECD exp.	5.13	0	lit exp.	1	4.8443	0.38585	5	4	EPI exp.	2	20.0469	2.02654	8	1	B(exp)	-	-	-	0.0917667	OECD exp.	0.000907861	EPI exp.
p112-54-9	CCCCCCCCCCCC=O	dodecanal	parent_chemical	184.324	organic	neutral	Transient	Transient	0	exp	2	0	Doc (OECD & lit exp.)	1	B(exp)	1	B(exp) V(QSAR avg.)	0	(M2-3)	(P1-2)	(P1-2)	N	N	-	3.6	OECD exp.	4.70046	0.259984	Avg. QSAR	2	4.70046	0.259984	5	8.41095	QSAR avg	2	8.41095	1.07176	8	1	B(exp)	-	-	-	2.03949	EPIwin Exp.	0.0554889	QSAR avg.
p112-55-0	CCCCCCCCCCCCS	dodecane-1-thiol	parent_chemical	202.404	organic	ionizable	Transient	Transient	0.707107		2	0.707107	Swater (Avg. QSAR)	1	B(QSAR)	1	B(QSAR) V(QSAR avg.)	0	(M2-3)	(P1-2)	(P1-2)	A	9.9631	QSAR (SPARC)	-	-	5.87837	0.347437	Avg. QSAR	1	5.75042	0.252995	5	3.56324	QSAR avg	2	3.56324	1.6169	8	1	B(QSAR)	-	-	-	165.6	OECD exp.	2.25597	QSAR avg.
p112-59-4	CCCCCCOCCOCCO	2-(2-hexyloxyethoxy)ethanol	parent_chemical	190.285	organic	neutral	Unstable MOC	Unstable MOC	0.57735	exp	4	0.57735	Doc (OECD & lit exp.)	1	B(exp)	1	B(exp)	0	(M4-5)	(P1-2)	(P1-2)	N	N	-	1.27	OECD exp.	1.67236	0.377711	Avg. QSAR	4	1.67236	0.377711	5	17000	EPI exp.	5	12003.2	1.18074	8	1	B(exp)	-	-	-	0.157294	EPIwin Exp.	7.11566e-07	EPI exp.
p112-60-7,h143-24-8,h9003-13-8,h50586-59-9,h66455-14-9,h68213-23-0,h68439-46-3,h68439-50-9,h69011-36-5	OCCOCCOCCOCCO	3,6,9-trioxaundecane-1,11-diol	hydrolysis_product,parent_chemical	194.229	organic	neutral	5	5	2.12132		5	0	Swater (EPI exp.)	4	B(QSAR)	4	B(QSAR) V(QSAR avg.)	2.12132	(M4-5)	(P1-2)	(P1-2)	N	N	-	-	-	-1.43414	0.329819	Avg. QSAR	5	-1.43414	0.329819	5	1000000	EPI exp.	5	2.7866e+06	1.8294	8	4	B(QSAR)	-	-	-	0.00619845	EPIwin Exp.	9.82017e-12	QSAR avg.
p112-61-8	CCCCCCCCCCCCCCCCCC(=O)OC	methyl stearate	parent_chemical	298.513	organic	neutral	Transient	Transient	0		1	0	Swater (Avg. QSAR)	1	B(QSAR)	1	B(QSAR) V(QSAR avg.)	0	(M1)	(P1-2)	(P1-2)	N	N	-	-	-	7.96736	0.519398	Avg. QSAR	1	7.96736	0.519398	5	0.0948965	QSAR avg	1	0.0948965	1.68685	8	1	B(QSAR)	4	Hydrowin	-	0.00181	OECD exp.	0.663719	QSAR avg.
p112-64-1	CCCCCCCCCCCCCC(=O)Cl	myristoyl chloride	parent_chemical	246.823	organic	neutral	Transient	Transient	0.707107		2	0.707107	Swater (Avg. QSAR)	1	B(QSAR) H(LHC QSAR)	1	B(QSAR) V(QSAR avg.) H(LHC QSAR)	0	(M2-3)	(P1-2)	(P1-2)	N	N	-	-	-	6.13248	0.573128	Avg. QSAR	1	6.13248	0.573128	5	0.512586	QSAR avg	2	0.512586	1.41389	8	1	B(QSAR)	1	LHC QSAR	-	0.285731	QSAR avg.	0.664627	QSAR avg.
p112-67-4	CCCCCCCCCCCCCCCC(=O)Cl	palmitoyl chloride	parent_chemical	274.877	organic	neutral	Transient	Transient	0.57735		2	0.57735	Doc (OECD & lit exp.)	1	B(QSAR) H(LHC QSAR)	1	B(QSAR) V(QSAR avg.) H(LHC QSAR)	0	(M2-3)	(P1-2)	(P1-2)	N	N	-	3.9015	OECD exp.	7.06737	0.58607	Avg. QSAR	1	7.06737	0.58607	5	0.106002	QSAR avg	1	0.106002	1.77704	8	1	B(QSAR)	1	LHC QSAR	-	0.0637506	QSAR avg.	1.04366	QSAR avg.
p112-69-6	CCCCCCCCCCCCCCCCN(C)C	hexadecyldimethylamine	parent_chemical	269.517	organic	ionizable	3	3	1.1547		5	1.1547	Swater (OECD & lit exp.)	2	B(QSAR)	2	B(QSAR) V(OECD exp.)	0	(M1)	(P3-4)	(P3-4)	B	7.13068	QSAR (SPARC)	-	-	5.42371	2.04112	Avg. QSAR	2	4.17131	0.910679	5	25689.3	OECD exp.	4	4946.94	2.5366	8	2	B(QSAR)	-	-	-	0.034	OECD exp.	0.000194664	OECD exp.
p112-72-1,h2549-53-3,h3234-85-3,h10341-03-4,h21643-42-5,h22393-85-7,h27306-79-2,h56677-60-2,h68213-23-0,h97808-97-4,h152827-98-0	CCCCCCCCCCCCCCO	tetradecanol	hydrolysis_product,parent_chemical	214.394	organic	neutral	Transient	Transient	0.57735	exp	1	0.57735	Doc (OECD & lit exp.)	1	B(exp)	1	B(exp) V(EPI exp.)	0	(M2-3)	(P1-2)	(P1-2)	N	N	-	4.71	OECD exp.	6.36		lit exp.	1	5.79167	0.423322	5	0.191	EPI exp.	2	4.21783	2.33016	8	1	B(exp)	-	-	-	0.0105433	OECD exp.	0.00654314	EPI exp.
p112-73-2	CCCCOCCOCCOCCCC	bis(2-butoxyethyl) ether	parent_chemical	218.339	organic	neutral	4.5	4.5	2.19848		4	0.57735	Swater (OECD & lit exp.)	4	B(QSAR)	4	B(QSAR) V(EPI exp.)	2.12132	(M2-3)	(P1-2)	(P3-4)	N	N	-	-	-	2.64872	0.265903	Avg. QSAR	3	2.64872	0.265903	5	2800	OECD exp.	4	1502.44	0.836795	8	4	B(QSAR)	-	-	-	3.47913	EPIwin Exp.	0.000102237	EPI exp.
p112-75-4	CCCCCCCCCCCCCCN(C)C	dimethyl(tetradecyl)amine	parent_chemical	241.463	organic	ionizable	3	Unstable MOC	1.1547		5	1.1547	Swater (OECD & lit exp.)	2	B(QSAR)	1	V(QSAR avg.)	0	(M1)	(P3-4)	(P3-4)	B	7.13068	QSAR (SPARC)	-	-	4.51822	1.98409	Avg. QSAR	2	3.26582	0.880006	5	37857.9	OECD exp.	4	5329.04	2.19671	8	2	B(QSAR)	-	-	-	0.157765	QSAR avg.	0.156047	QSAR avg.
p112-76-5	CCCCCCCCCCCCCCCCCC(=O)Cl	stearoyl chloride	parent_chemical	302.931	organic	neutral	Transient	Transient	0.57735		2	0.57735	Doc (OECD & lit exp.)	1	B(QSAR) H(LHC QSAR)	1	B(QSAR) H(LHC QSAR)	0	(M2-3)	(P1-2)	(P1-2)	N	N	-	4.4355	OECD exp.	7.98916	0.593743	Avg. QSAR	1	7.98916	0.593743	5	0.0277531	QSAR avg	1	0.0277531	1.89502	8	1	B(QSAR)	1	LHC QSAR	-	0.0174701	QSAR avg.	1.94545e-05	OECD exp.
p112-77-6	CCCCCCCC/C=C\CCCCCCCC(=O)Cl	oleoyl chloride	parent_chemical	300.915	organic	neutral	Transient	Transient	0		1	0	Swater (Avg. QSAR)	1	B(QSAR) H(LHC QSAR)	1	B(QSAR) V(QSAR avg.) H(LHC QSAR)	0	(M2-3)	(P1-2)	(P1-2)	N	N	-	-	-	7.64723	0.622958	Avg. QSAR	1	7.64723	0.622958	5	0.0527636	QSAR avg	1	0.0527636	1.93886	8	1	B(QSAR)	1	LHC QSAR	-	0.00366563	QSAR avg.	1.41187	QSAR avg.
p112-82-3	CCCCCCCCCCCCCCCCBr	1-bromohexadecane	parent_chemical	305.35	organic	neutral	Transient	Transient	0.707107		1	0	Swater (Avg. QSAR)	2	B(QSAR) H(LHC QSAR)	1	V(QSAR avg.)	0.707107	(M1)	(P3-4)	(P3-4)	N	N	-	-	-	8.28078	0.519862	Avg. QSAR	1	8.28078	0.519862	5	0.0195008	QSAR avg	1	0.0195008	2.49154	8	2	B(QSAR)	2	LHC QSAR	-	0.00646505	EPIwin Exp.	22.6098	QSAR avg.
p112-84-5	CCCCCCCC/C=C\CCCCCCCCCCCC(=O)N	(Z)-docos-13-enamide	parent_chemical	337.593	organic	neutral	Transient	Transient	0	exp	1	0	Doc (OECD & lit exp.)	1	B(exp)	1	B(exp)	0	(M1)	(P1-2)	(P1-2)	N	N	-	5	OECD exp.	8.13188	0.305122	Avg. QSAR	1	8.13188	0.305122	5	0.094621	QSAR avg	1	0.094621	2.08511	8	1	B(exp)	-	-	-	5.52672e-06	QSAR avg.	5.94529e-05	QSAR avg.
p112-85-6,h3061-75-4,h17671-27-1,h77538-19-3	CCCCCCCCCCCCCCCCCCCCCC(=O)O	docosanoic acid	hydrolysis_product,parent_chemical	340.594	organic	ionizable	Transient	Transient	1.1547		1	1.1547	Doc (PP-LFER)	1	B(QSAR)	1	B(QSAR)	0	(M1)	(P1-2)	(P1-2)	A	9.74473	Exp (OECD (log) - must be for a micelle/agglomorate)	7.31764	PP-LFER	7.74517	2.15511	Avg. QSAR	1	7.5663	1.9322	5	0.016	EPI exp.	3	113.846	2.61458	8	1	B(QSAR)	4	OECD exp.	-	3.26226e-05	QSAR avg.	4.22517e-06	PP-LFER
p112-88-9,s27070-58-2	CCCCCCCCCCCCCCCCC=C	octadec-1-ene:octadecene	parent_chemical,salt_or_mixture_component	252.487	organic	neutral	Transient	Transient	0.5	exp	1	0.5	Doc (OECD & lit exp.)	1	B(exp)	1	B(exp) V(OECD exp.)	0	(M1)	(P1-2)	(P1-2)	N	N	-	5.63	OECD exp.	9.01938	0.954122	Avg. QSAR	1	9.01938	0.954122	5	47	OECD exp.	1	0.00860597	2.53005	8	1	B(exp)	-	-	-	3655.43	OECD exp.	7.92599	OECD exp.
p112-91-4	CCCCCCCC/C=C\CCCCCCCC#N	oleonitrile	parent_chemical	263.47	organic	neutral	Transient	Transient	0		1	0	Swater (Avg. QSAR)	1	B(exp)	1	B(exp) V(QSAR avg.)	0	(M1)	(P1-2)	(P1-2)	N	N	-	-	-	7.25816	0.281515	Avg. QSAR	1	7.25816	0.281515	5	0.0894465	QSAR avg	1	0.0894465	2.17412	8	1	B(exp)	3	LHC QSAR	-	0.00494404	QSAR avg.	0.0601351	QSAR avg.
p112-92-5,h693-36-7,h2082-79-3,h3386-33-2,h4813-57-4,h6297-03-6,h9005-00-9,h32360-05-7,h39471-52-8,h72576-80-8	CCCCCCCCCCCCCCCCCCO	octadecan-1-ol	hydrolysis_product,parent_chemical	270.502	organic	neutral	Transient	Transient	0.57735	exp	1	0.57735	Doc (OECD & lit exp.)	1	B(exp)	1	B(exp) V(EPI exp.)	0	(M1)	(P1-2)	(P1-2)	N	N	-	5.67	OECD exp.	7.64261	0.450738	Avg. QSAR	1	7.64261	0.450738	5	0.0011	EPI exp.	2	0.256206	2.54454	8	1	B(exp)	-	-	-	0.216665	OECD exp.	0.0343924	EPI exp.
p112-95-8	CCCCCCCCCCCCCCCCCCCC	icosane	parent_chemical	282.557	organic	neutral	Transient	Transient	0		1	0	Swater (EPI exp.)	1	B(QSAR)	1	B(QSAR) V(QSAR avg.)	0	(M1)	(P1-2)	(P1-2)	N	N	-	-	-	10.2238	0.948872	Avg. QSAR	1	10.2238	0.948872	5	0.0019	EPI exp.	1	0.00109807	2.4915	8	1	B(QSAR)	-	-	-	0.000615846	EPIwin Exp.	5145.3	QSAR avg.
p112-96-9	CCCCCCCCCCCCCCCCCCN=C=O	octadecyl isocyanate	parent_chemical	295.512	organic	ionizable	Unstable MOC	Unstable MOC	2.82843		5	2.82843	Swater (Avg. QSAR)	1	B(QSAR) H(LHC QSAR)	1	B(QSAR) V(QSAR avg.) H(LHC QSAR)	0	(M1)	(P3-4)	(P3-4)	B	10.025	QSAR (avg.)	-	-	7.66563	1.38025	Avg. QSAR	1	5.25563	2.43239	5	34046	QSAR avg	5	34046	2.62741	8	1	B(QSAR)	1	LHC QSAR	-	0.130095	QSAR avg.	2.34553	QSAR avg.
p114-07-8,s7704-67-8,h13127-18-9	CCC1OC(=O)C(C)C(OC2OC(C)C(C(C2)(C)OC)O)C(C)C(OC2OC(C)CC(C2O)N(C)C)C(CC(C(=O)C(C(C1(C)O)O)C)C)(C)O	erythromycin:erythromycin thiocyanate	hydrolysis_product,parent_chemical,salt_or_mixture_component	733.944	organic	ionizable	5	5	0		5	0	Swater (Avg. QSAR)	4	B(QSAR)	4	B(QSAR) V(QSAR avg.)	0	(M2-3)	(P3-4)	(P3-4)	amph	amphoprotic	-	-	-	0.141813	1.38252	Avg. QSAR	5	0.141813	1.38252	5	172888	QSAR avg	5	172888	2.12948	8	4	B(QSAR)	-	-	-	1.41298e-23	QSAR avg.	1.10824e-27	QSAR avg.
p115-07-1,h106-95-6,h107-05-1	CC=C	propene	hydrolysis_product,parent_chemical	42.0811	organic	neutral	Unstable MOC	Unstable MOC	0.816497		5	0.816497	Doc (PP-LFER)	1	B(QSAR)	1	B(QSAR) V(Lit exp.)	0	(M4-5)	(P1-2)	(P1-2)	N	N	-	0.80424	PP-LFER	1.77		lit exp.	4	1.59572	0.169139	5	200	OECD exp.	4	4787.47	1.58256	8	1	B(QSAR)	-	-	-	1158377	EPIwin Exp.	9.33254	Lit exp.
p115-10-6	COC	dimethyl ether	parent_chemical	46.0694	organic	neutral	3	Unstable MOC	0.707107		5	0	Doc (PP-LFER)	2	B(QSAR)	1	V(Lit exp.)	0.707107	(M4-5)	(P1-2)	(P1-2)	N	N	-	-0.3813	PP-LFER	0.1		lit exp.	5	0.0869225	0.0472475	5	46000	EPI exp.	5	190244	0.650335	8	2	B(QSAR)	-	-	-	593185	EPIwin Exp.	0.0398107	Lit exp.
p115-11-7	CC(=C)C	2-methylpropene	parent_chemical	56.1082	organic	neutral	Transient	Transient	0.57735		3	0.57735	Doc (OECD & lit exp.)	1	B(QSAR)	1	B(QSAR) V(EPI exp.)	0	(M2-3)	(P1-2)	(P1-2)	N	N	-	2.07	OECD exp.	2.34		lit exp.	4	2.03163	0.244602	5	263	EPI exp.	4	4305.02	1.78772	8	1	B(QSAR)	-	-	-	307923	EPIwin Exp.	8.91503	EPI exp.
p115-18-4	CC(=C(C)C)O	2-methylbut-3-en-2-ol	parent_chemical	86.1346	organic	ionizable	Unstable MOC	Unstable MOC	0		5	0	Swater (Avg. QSAR)	1	B(exp) H(LHC QSAR)	1	B(exp) V(QSAR avg.) H(LHC QSAR)	0	(M4-5)	(P1-2)	(P1-2)	A	11.4744	QSAR (SPARC)	-	-	1.20802	1.07161	Avg. QSAR	5	1.20229	1.06644	5	54143.9	QSAR avg	5	54143.9	1.41943	8	1	B(exp)	1	LHC QSAR	-	3034	OECD exp.	0.00256255	QSAR avg.
p115-19-5	CC(C#CO)C	2-methylbut-3-yn-2-ol	parent_chemical	84.1187	organic	ionizable	Unstable MOC	Unstable MOC	0		5	0	Doc (OECD & lit exp.)	1	B(QSAR)	1	B(QSAR) V(QSAR avg.)	0	(M4-5)	(P1-2)	(P1-2)	A	9.62707	QSAR (SPARC)	0.143645	OECD exp.	0.45044	1.52615	Avg. QSAR	5	0.239898	1.3959	5	262412	QSAR avg	5	262412	0.801037	8	1	B(QSAR)	-	-	-	1454.15	QSAR avg.	0.000877281	QSAR avg.
p115-21-9	CC[Si](Cl)(Cl)Cl	trichloro(ethyl)silane	parent_chemical	163.507	organo_silane	neutral	4.5	Unstable MOC	1		4	0.707107	Swater (Avg. QSAR)	3	B(QSAR)	1	V(QSAR avg.)	0.707107	(M2-3)	(P1-2)	(P1-2)	N	N	-	-	-	2.73945	0.76605	Avg. QSAR	3	2.73945	0.76605	5	1385.83	QSAR avg	4	1385.83	1.30723	8	3	B(QSAR)	-	-	-	4533.97	OECD exp.	0.193299	QSAR avg.
p115-27-5	O=C1OC(=O)C2C1[C@]1(Cl)C(=C([C@]2(C1(Cl)Cl)Cl)Cl)Cl	1,4,5,6,7,7-hexachloro-8,9,10-trinorborn-5-ene-2,3-dicarboxylic anhydride	parent_chemical	370.832	organic	neutral	Unstable MOC	Unstable MOC	0.957427		5	0.957427	Doc (OECD & lit exp.)	1	H(LHC QSAR)	1	H(LHC QSAR)	0	(M2-3)	(P3-4)	(P1-2)	N	N	-	0.92	OECD exp.	1.39		OECD exp	3	3.06643	0.814956	5	444.077	QSAR avg	3	444.077	2.629	8	4	B(QSAR)	1	LHC QSAR	-	0.00268	OECD exp.	9.91827e-08	PP-LFER
p115-46-8,s1798-50-1	OC(c1ccccc1)(c1ccccc1)C1CCNCC1	azacyclonol:α,α-diphenylpiperidine-4-methanol hydrochloride	parent_chemical,salt_or_mixture_component	267.373	organic	ionizable	5	5	1.41421		5	0	Swater (Avg. QSAR)	4	B(QSAR)	4	B(QSAR) V(QSAR avg.)	1.41421	(M1)	(P3-4)	(P3-4)	B	10.0027	QSAR (SPARC)	-	-	1.71358	1.74043	Avg. QSAR	5	-0.6875	2.22844	5	3.51099e+08	QSAR avg	5	3.51099e+08	1.43294	8	4	B(QSAR)	-	-	-	4.47092e-06	QSAR avg.	2.38645e-10	QSAR avg.
p115-70-8	CCC(CO)(CO)N	2-amino-2-ethylpropanediol	parent_chemical	119.165	organic	ionizable	Unstable MOC	Unstable MOC	0		5	0	Swater (EPI exp.)	1	B(QSAR)	1	B(QSAR)	0	(M4-5)	(P1-2)	(P1-2)	B	9.03	Exp (OECD)	-	-	-2.3112	1.28246	Avg. QSAR	5	-4.3232	2.18536	5	1000000	EPI exp.	5	1.77687e+11	1.44568	8	1	B(QSAR)	-	-	-	0.29	OECD exp.	1.3525e-09	QSAR avg.
p115-77-5,h126-58-9,h1455-42-1,h3296-90-0,h6600-31-3,h6683-19-8,h7299-99-2,h7575-23-7,h9051-49-4,h15834-04-5,h19186-97-1,h19321-40-5,h25151-96-6,h25811-35-2,h30374-35-7,h30599-15-6,h31775-89-0,h38051-10-4,h62125-22-8,h93803-89-5,h178671-58-4,h178671-69-7	OCC(CO)(CO)CO	pentaerythritol	hydrolysis_product,parent_chemical	136.149	organic	neutral	Unstable MOC	Unstable MOC	0	exp	5	0	Swater (OECD & lit exp.)	1	B(exp)	1	B(exp)	0	(M4-5)	(P1-2)	(P1-2)	N	N	-	-	-	-1.7		OECD exp	5	-2.52982	0.977144	5	62000	OECD exp.	5	2.61431e+07	2.22167	8	1	B(exp)	-	-	-	0.000155771	QSAR avg.	5.57545e-09	QSAR avg.
p115-84-4	CCCCC(CO)(CO)CC	2-butyl-2-ethylpropanediol	parent_chemical	160.258	organic	neutral	Unstable MOC	Unstable MOC	0		4	0	Swater (OECD & lit exp.)	1	B(QSAR)	1	B(QSAR)	0	(M2-3)	(P1-2)	(P1-2)	N	N	-	-	-	1.6893	0.318881	Avg. QSAR	4	1.6893	0.318881	5	8800	OECD exp.	4	9792.95	1.05086	8	1	B(QSAR)	4	OECD exp.	-	0.01333	EPIwin Exp.	1.30815e-05	QSAR avg.
p115-86-6	O=P(Oc1ccccc1)(Oc1ccccc1)Oc1ccccc1	triphenyl phosphate	parent_chemical	326.291	organic	neutral	Transient	Transient	0.57735		2	0.57735	Doc (PP-LFER)	1	B(exp) H(OECD exp.)	1	B(exp) H(OECD exp.)	0	(M2-3)	(P3-4)	(P3-4)	N	N	-	3.64426	PP-LFER	4.74166	0.369986	Avg. QSAR	1	4.74166	0.369986	4	1.9	EPI exp.	2	5.15351	1.73335	6	1	B(exp)	1	OECD exp.	-	0.000837124	EPIwin Exp.	0.000135361	EPI exp.
p115-95-7	C=CC(OC(=O)C)(CCC=C(C)C)C	linalyl acetate	parent_chemical	196.291	organic	neutral	Transient	Transient	0.57735	exp	3	0.57735	Doc (OECD & lit exp.)	1	B(exp)	1	B(exp) V(PP-LFER)	0	(M2-3)	(P1-2)	(P1-2)	N	N	-	2.71	OECD exp.	3.70129	0.607629	Avg. QSAR	2	3.70129	0.607629	5	115.301	QSAR avg	3	115.301	1.00618	8	1	B(exp)	4	Hydrowin	-	14.7963	EPIwin Exp.	0.000503887	PP-LFER
p115-96-8	ClCCOP(=O)(OCCCl)OCCCl	tris(2-chloroethyl) phosphate	parent_chemical	285.493	organic	neutral	Unstable MOC	Unstable MOC	1.52753		5	0.57735	Doc (PP-LFER)	1	H(Hydrowin)	1	H(Hydrowin)	1.41421	(M4-5)	(P3-4)	(P3-4)	N	N	-	0.6764	PP-LFER	1.75474	0.235074	Avg. QSAR	4	1.75474	0.235074	4	7000	EPI exp.	4	2749.7	0.739655	6	4	B(QSAR)	1	Hydrowin	-	8.14625	OECD exp.	0.000134543	EPI exp.
p116-02-9,h118-56-9	CC1CC(O)CC(C1)(C)C	3,3,5-trimethylcyclohexanol	hydrolysis_product,parent_chemical	142.243	organic	neutral	2	Unstable MOC	0.912871		4	0.57735	Swater (OECD & lit exp.)	2	B(QSAR)	1	V(QSAR avg.)	0.707107	(M2-3)	(P1-2)	(P1-2)	N	N	-	-	-	2.53404	0.347542	Avg. QSAR	3	2.53404	0.347542	5	1800	OECD exp.	4	1557.81	0.531412	8	2	B(QSAR)	-	-	-	17.5588	QSAR avg.	0.000584973	QSAR avg.
p116-11-0	COC(=C)C	isopropenyl methyl ether	parent_chemical	72.1076	organic	neutral	5	Unstable MOC	1.41421		5	0	Swater (EPI exp.)	3	B(QSAR)	1	V(QSAR avg.)	1.41421	(M2-3)	(P1-2)	(P1-2)	N	N	-	-	-	1.02774	0.438058	Avg. QSAR	5	1.02774	0.438058	5	1000000	EPI exp.	5	40098.6	0.775999	8	3	B(QSAR)	-	-	-	68916.1	EPIwin Exp.	0.485024	QSAR avg.
p116-14-3	FC(=C(F)F)F	tetrafluoroethylene	parent_chemical	100.016	organic	neutral	3	Unstable MOC	1.08012		5	0.816497	Doc (PP-LFER)	2	B(QSAR)	1	V(EPI exp.)	0.707107	(M4-5)	(P1-2)	(P1-2)	N	N	-	0.5926	PP-LFER	1.46391	0.298554	Avg. QSAR	4	1.46391	0.298554	5	110	OECD exp.	4	6944.99	1.08264	8	2	B(QSAR)	-	-	-	3.26585e+06	EPIwin Exp.	25.7227	EPI exp.
p116-15-4	FC(=C(C(F)(F)F)F)F	hexafluoropropene	parent_chemical	150.024	organic	neutral	5	Unstable MOC	1.19024		5	0.957427	Doc (PP-LFER)	4	B(QSAR)	1	V(PP-LFER)	0.707107	(M2-3)	(P3-4)	(P3-4)	N	N	-	0.74858	PP-LFER	2.05636	0.214607	Avg. QSAR	4	2.05636	0.214607	5	82	OECD exp.	3	824.243	0.88967	8	4	B(QSAR)	-	-	-	653170	EPIwin Exp.	6.8802	PP-LFER
p116-16-5	O=C(C(Cl)(Cl)Cl)C(Cl)(Cl)Cl	hexachloroacetone	parent_chemical	264.751	organic	neutral	4	Transient	0.707107		3	0.707107	Swater (Avg. QSAR)	4	B(QSAR)	1	V(QSAR avg.)	0	(M2-3)	(P3-4)	(P1-2)	N	N	-	-	-	3.27651	0.632972	Avg. QSAR	2	3.27651	0.632972	5	157.381	QSAR avg	3	157.381	1.82684	8	4	B(QSAR)	-	-	-	65.1777	QSAR avg.	0.141278	QSAR avg.
p116-37-0	CC(COc1ccccc1C(c1ccccc1OCC(O)C)(C)C)O	1,1'-isopropylidenebis(p-phenyleneoxy)dipropan-2-ol	parent_chemical	344.454	organic	neutral	Transient	Transient	0.83666		2	0.447214	Doc (OECD & lit exp.)	2	B(QSAR)	2	B(QSAR)	0.707107	(M1)	(P3-4)	(P3-4)	N	N	-	3.35	OECD exp.	3.3		OECD exp	2	4.01864	0.386353	5	109	OECD exp.	2	15.5048	1.36576	8	2	B(QSAR)	4	OECD exp.	-	5.64128e-09	QSAR avg.	2.99051e-10	QSAR avg.
p116-53-0,h7452-79-1,h18936-17-9,h75330-75-5,h151006-11-0	CC(C(=O)O)CC	2-methylbutyric acid	hydrolysis_product,parent_chemical	102.134	organic	ionizable	Unstable MOC	Unstable MOC	0		5	0	Swater (EPI exp.)	1	B(QSAR)	1	B(QSAR)	0	(M4-5)	(P1-2)	(P1-2)	A	4.8	Exp (OECD)	-	-	-0.322676	1.60838	Avg. QSAR	5	-2.40268	1.65223	5	45000	EPI exp.	5	3.50104e+09	0.973603	8	1	B(QSAR)	-	-	-	65.4503	EPIwin Exp.	6.01151e-05	EPI exp.
p116-75-6	O=C1c2c(ccc(c2C(=O)c2c1cccc2)Nc1c(C)cc(cc1C)C)Nc1c(C)cc(cc1C)C	1,4-bis(mesitylamino)anthraquinone	parent_chemical	474.606	organic	neutral	Immobile POC	Immobile POC	0		1	0	Doc (OECD & lit exp.)	4	B(QSAR)	4	B(QSAR) V(QSAR avg.)	0	(M2-3)	(P3-4)	(P3-4)	N	N	-	7.7	OECD exp.	9.4271	1.66786	Avg. QSAR	1	9.4271	1.66786	5	4.2712e-05	QSAR avg	1	4.2712e-05	0.994138	8	4	B(QSAR)	-	-	-	4.91924e-13	QSAR avg.	3.73815e-13	QSAR avg.
p117-08-8	O=C1OC(=O)c2c1c(Cl)c(c(c2Cl)Cl)Cl	tetrachlorophthalic anhydride	parent_chemical	285.899	organic	neutral	Unstable MOC	Unstable MOC	1.1547		4	1.1547	Doc (OECD & lit exp.)	1	H(LHC QSAR)	1	H(LHC QSAR)	0	(M2-3)	(P3-4)	(P3-4)	N	N	-	1.918	OECD exp.	3.58829	0.840853	Avg. QSAR	2	3.58829	0.840853	5	30.2567	QSAR avg	2	30.2567	1.59168	8	4	B(QSAR)	1	LHC QSAR	-	5.48955e-05	QSAR avg.	3.9066e-05	QSAR avg.
p117-21-5	O=C1OC(=O)c2c1c(Cl)ccc2	3-chlorophthalic anhydride	parent_chemical	182.564	organic	neutral	Unstable MOC	Unstable MOC	0.707107		4	0	Swater (Avg. QSAR)	1	H(LHC QSAR)	1	H(LHC QSAR)	0.707107	(M2-3)	(P1-2)	(P3-4)	N	N	-	-	-	1.65361	0.979232	Avg. QSAR	4	1.65361	0.979232	5	3671.12	QSAR avg	4	3671.12	1.80477	8	4	B(QSAR)	1	LHC QSAR	-	0.221607	QSAR avg.	9.6111e-05	QSAR avg.
p117-61-3	Nc1ccc(c(c1)S(=O)(=O)O)c1ccc(cc1S(=O)(=O)O)N	benzidine-2,2'-disulphonic acid	parent_chemical	344.367	organic	ionizable	4	4	1.1547		3	1.1547	Swater (OECD & lit exp.)	4	B(QSAR)	4	B(QSAR) V(QSAR avg.)	0	(M2-3)	(P3-4)	(P3-4)	amph	amphoprotic	-	-	-	-3.27179	1.09489	Avg. QSAR	5	-3.27179	1.09489	4	700	OECD exp.	5	207005	1.9027	6	4	B(QSAR)	-	-	-	4.31892e-16	QSAR avg.	4.62109e-22	QSAR avg.
p117-69-1	Nc1ccc2c(c1)cc(c(c2O)N=Nc1c(O)cc(c2c1ccc(c2)N(=O)=O)S(=O)(=O)O)S(=O)(=O)O	4-[(6-amino-1-hydroxy-3-sulpho-2-naphthyl)azo]-3-hydroxy-7-nitronaphthalene-1-sulphonic acid	parent_chemical	534.482	organic	ionizable	5	5	0		5	0	Swater (Avg. QSAR)	4	B(QSAR)	4	B(QSAR) V(QSAR avg.)	0	(M4-5)	(P3-4)	(P3-4)	amph	amphoprotic	-	-	-	-1.07556	2.14891	Avg. QSAR	5	-1.07556	2.14891	4	166670	QSAR avg	5	166670	2.68321	5	4	B(QSAR)	-	-	-	3.35916e-25	QSAR avg.	1.88933e-32	QSAR avg.
p117-81-7	CCCCCCCCOC(=O)c1ccccc1C(=O)OCCCCCCCC	bis(2-ethylhexyl) phthalate	parent_chemical	390.567	organic	neutral	Transient	Transient	0	exp	1	0	Doc (OECD & lit exp.)	1	B(exp)	1	B(exp)	0	(M1)	(P1-2)	(P3-4)	N	N	-	5.68	OECD exp.	8.18909	0.265789	Avg. QSAR	1	8.18909	0.265789	5	0.022	EPI exp.	1	0.0870034	1.94988	8	1	B(exp)	4	Hydrowin	-	0.0005815	OECD exp.	0.000105099	EPI exp.
p117-96-4	CC(=O)Nc1c(I)c(NC(=O)C)c(c(c1I)C(=O)O)I	3,5-diacetamido-2,4,6-triiodobenzoic acid	parent_chemical	613.917	organic	ionizable	5	5	0		5	0	Swater (Avg. QSAR)	4	B(QSAR)	4	B(QSAR) V(QSAR avg.)	0	(M4-5)	(P1-2)	(P1-2)	amph	amphoprotic	-	-	-	1.09221	2.88922	Avg. QSAR	5	1.09221	2.88922	5	71889.1	QSAR avg	5	71889.1	1.91353	8	4	B(QSAR)	-	-	-	9.73789e-13	QSAR avg.	2.07385e-13	QSAR avg.
p118-41-2	COc1cc(cc(c1OC)OC)C(=O)O	3,4,5-trimethoxybenzoic acid	parent_chemical	212.204	organic	ionizable	Unstable MOC	Unstable MOC	0		5	0	Swater (Avg. QSAR)	1	B(QSAR)	1	B(QSAR)	0	(M4-5)	(P3-4)	(P3-4)	A	3.97699	QSAR (SPARC)	-	-	-0.330347	1.76504	Avg. QSAR	5	-2.73955	1.96209	5	2.09565e+09	QSAR avg	5	2.09565e+09	0.951051	8	1	B(QSAR)	-	-	-	0.000494827	QSAR avg.	3.34533e-07	QSAR avg.
p118-45-6	Clc1ccc2c(c1)C(=O)OC2=O	4-chlorophthalic anhydride	parent_chemical	182.564	organic	neutral	Unstable MOC	Unstable MOC	0.912871		4	0.57735	Swater (Avg. QSAR)	1	H(LHC QSAR)	1	H(LHC QSAR)	0.707107	(M2-3)	(P3-4)	(P3-4)	N	N	-	-	-	-2.78		OECD exp	4	1.66542	1.01056	5	3908.83	QSAR avg	4	3908.83	1.85035	8	4	B(QSAR)	1	LHC QSAR	-	0.220512	QSAR avg.	9.61075e-05	QSAR avg.
p118-48-9	O=c1oc(=O)c2c([nH]1)cccc2	4H-3,1-benzoxazine-2,4(1H)-dione	parent_chemical	163.134	organic	ionizable	Unstable MOC	Unstable MOC	0.957427	exp	5	0.957427	Doc (OECD & lit exp.)	1	B(exp)	1	B(exp)	0	(M4-5)	(P3-4)	(P1-2)	A	9.59759	QSAR (avg.)	0.452733	OECD exp.	1.20878	1.02351	Avg. QSAR	5	1.07196	0.784131	4	1057.76	OECD exp.	4	5086	1.44735	6	1	B(exp)	-	-	-	0.100642	QSAR avg.	1.6317e-07	QSAR avg.
p118-56-9	CC1CC(OC(=O)c2ccccc2O)CC(C1)(C)C	homosalate	parent_chemical	262.351	organic	ionizable	Transient	Transient	0.707107		3	0.707107	Swater (Avg. QSAR)	1	H(OECD exp.)	1	H(OECD exp.)	0	(M2-3)	(P1-2)	(P1-2)	A	9.99285	QSAR (SPARC)	-	-	4.63082	0.932195	Avg. QSAR	2	4.50897	0.813358	5	198.36	QSAR avg	3	198.36	2.32256	8	2	B(QSAR)	1	OECD exp.	-	0.015	OECD exp.	0.000293988	QSAR avg.
p118-58-1	O=C(c1ccccc1O)OCc1ccccc1	benzyl salicylate	parent_chemical	228.249	organic	ionizable	Transient	Transient	0.57735	exp	2	0.57735	Doc (OECD & lit exp.)	1	B(exp)	1	B(exp)	0	(M2-3)	(P1-2)	(P1-2)	A	9.82282	QSAR (SPARC)	3.3514	OECD exp.	3.29675	0.79243	Avg. QSAR	3	3.13731	0.641825	5	527.717	QSAR avg	3	527.717	1.62753	8	1	B(exp)	4	Hydrowin	-	0.0104	OECD exp.	6.64489e-06	QSAR avg.
p118-60-5	CCCCC(COC(=O)c1ccccc1O)CC	2-ethylhexyl salicylate	parent_chemical	250.34	organic	ionizable	Transient	Transient	1.1547		3	1.1547	Swater (Avg. QSAR)	1	B(QSAR)	1	B(QSAR) V(QSAR avg.)	0	(M2-3)	(P1-2)	(P1-2)	A	10.1627	QSAR (SPARC)	-	-	5.77273		OECD exp	1	4.72144	0.709921	5	127.413	QSAR avg	3	127.413	2.28397	8	1	B(QSAR)	4	Hydrowin	-	0.0519	OECD exp.	0.000520074	QSAR avg.
p118-69-4,s29797-40-8,h81-19-6	Clc1cccc(c1C)Cl	2,6-dichlorotoluene:dichloromethylbenzene	hydrolysis_product,parent_chemical,salt_or_mixture_component	161.032	organic	neutral	4	Transient	0.707107		2	0	Swater (Avg. QSAR)	4	B(QSAR)	1	V(QSAR avg.)	0.707107	(M2-3)	(P3-4)	(P3-4)	N	N	-	-	-	3.72041	0.0874376	Avg. QSAR	2	3.72041	0.0874376	5	45.1379	QSAR avg	2	45.1379	0.745024	8	4	B(QSAR)	-	-	-	40.3545	QSAR avg.	0.117324	QSAR avg.
p118-75-2	ClC1=C(Cl)C(=O)C(=C(C1=O)Cl)Cl	tetrachloro-p-benzoquinone	parent_chemical	245.877	organic	neutral	4	4	0		3	0	Swater (EPI exp.)	4	B(QSAR)	4	B(QSAR) V(QSAR avg.)	0	(M2-3)	(P3-4)	(P1-2)	N	N	-	-	-	2.30482	0.201992	Avg. QSAR	3	2.30482	0.201992	5	250	EPI exp.	3	356.454	1.69327	8	4	B(QSAR)	-	-	-	0.00366638	QSAR avg.	1.95624e-07	QSAR avg.
p118-79-6	Brc1cc(Br)c(c(c1)Br)O	2,4,6-tribromophenol	parent_chemical	330.817	organic	ionizable	5	Unstable MOC	1.41421		5	1.41421	Doc (PP-LFER)	4	B(QSAR)	1	PT(exp.)	0	(M2-3)	(P1-2)	(P1-2)	A	6.19783	QSAR (SPARC)	-0.431641	PP-LFER	2.79972	1.46825	Avg. QSAR	4	1.27882	1.21841	5	317111	OECD exp.	5	803758	2.30402	8	4	B(QSAR)	-	-	1	0.063	OECD exp.	0.000168241	OECD exp.
p118-82-1	CC(c1cc(Cc2cc(c(c(c2)C(C)(C)C)O)C(C)(C)C)cc(c1O)C(C)(C)C)(C)C	2,2',6,6'-tetra-tert-butyl-4,4'-methylenediphenol	parent_chemical	424.671	organic	ionizable	Immobile POC	Immobile POC	0		1	0	Doc (OECD & lit exp.)	4	B(QSAR)	4	B(QSAR) V(QSAR avg.)	0	(M1)	(P3-4)	(P3-4)	A	11.838	QSAR (SPARC)	5.62374	OECD exp.	7.39374		OECD exp	1	9.21444	0.464791	5	0.0936601	QSAR avg	1	0.0936601	2.60947	8	4	B(QSAR)	-	-	-	1.48e-06	OECD exp.	7.2897e-08	QSAR avg.
p118-83-2	Clc1ccc(c(c1)C(F)(F)F)N(=O)=O	5-chloro-α,α,α-trifluoro-2-nitrotoluene	parent_chemical	225.555	organic	neutral	Transient	Transient	0		3	0	Swater (EPI exp.)	1	H(LHC QSAR)	1	V(QSAR avg.) H(LHC QSAR)	0	(M2-3)	(P3-4)	(P3-4)	N	N	-	-	-	3.20034	0.252368	Avg. QSAR	3	3.20034	0.252368	5	100	EPI exp.	3	61.103	1.50627	8	4	B(QSAR)	1	LHC QSAR	-	5.35965	QSAR avg.	0.00368808	QSAR avg.
p118-88-7	Nc1ccc(c(c1)S(=O)(=O)O)C	4-aminotoluene-2-sulphonic acid	parent_chemical	187.218	organic	ionizable	4.5	4.5	0.707107		4	0	Swater (EPI exp.)	4	B(QSAR)	4	B(QSAR) V(QSAR avg.)	0.707107	(M4-5)	(P3-4)	(P3-4)	amph	amphoprotic	-	-	-	-1.66783	0.405305	Avg. QSAR	5	-1.66783	0.405305	4	4500	EPI exp.	5	387767	1.36555	6	4	B(QSAR)	-	-	-	9.42431e-06	QSAR avg.	4.01176e-11	QSAR avg.
p118-92-3,h224049-04-1,h697235-49-7	OC(=O)c1ccccc1N	anthranilic acid	hydrolysis_product,parent_chemical	137.139	organic	ionizable	Unstable MOC	Unstable MOC	0.57735	exp	4	0.57735	Swater (OECD & lit exp.)	1	B(exp)	1	B(exp)	0	(M4-5)	(P1-2)	(P3-4)	amph	amphoprotic	-	-	-	-0.0823691	1.77228	Avg. QSAR	5	-0.0823691	1.77228	5	4500	OECD exp.	5	104518	2.22437	8	1	B(exp)	-	-	-	0.00650935	QSAR avg.	5.07386e-08	QSAR avg.
p118-96-7	O=N(=O)c1cc(N(=O)=O)c(c(c1)N(=O)=O)C	2,4,6-trinitrotoluene	parent_chemical	227.134	organic	neutral	4	4	0.547723		3	0.547723	Doc (PP-LFER)	4	B(QSAR)	4	B(QSAR) V(OECD exp.)	0	(M2-3)	(P3-4)	(P3-4)	N	N	-	2.07678	PP-LFER	1.65		OECD exp	4	2.08074	0.30593	5	127	OECD exp.	3	549.844	1.52023	8	4	B(QSAR)	-	-	-	0.00106907	EPIwin Exp.	4.03621e-06	OECD exp.
p119-17-5	CC1=NN(C(=O)C1)c1cccc(c1)S(=O)(=O)O	m-(4,5-dihydro-3-methyl-5-oxo-1H-pyrazol-1-yl)benzenesulphonic acid	parent_chemical	254.266	organic	ionizable	5	5	0.707107		5	0	Swater (Avg. QSAR)	4	B(QSAR)	4	B(QSAR) V(QSAR avg.)	0.707107	(M4-5)	(P1-2)	(P1-2)	amph	amphoprotic	-	-	-	-1.33929	0.535123	Avg. QSAR	5	-1.33929	0.535123	4	537299	QSAR avg	5	537299	1.66156	6	4	B(QSAR)	-	-	-	4.29226e-09	QSAR avg.	1.72166e-12	QSAR avg.
p119-36-8	COC(=O)c1ccccc1O	methyl salicylate	parent_chemical	152.151	organic	ionizable	Unstable MOC	Unstable MOC	0.57735		4	0.57735	Doc (PP-LFER)	1	B(exp)	1	B(exp) V(EPI exp.)	0	(M4-5)	(P1-2)	(P1-2)	A	10.1344	QSAR (SPARC)	1.40611	PP-LFER	2.10097		lit exp.	4	1.62413	0.486849	5	700	EPI exp.	5	10959.3	0.721449	8	1	B(exp)	4	Hydrowin	-	19.4	OECD exp.	0.00401176	EPI exp.
p119-40-4	Oc1cc(cc2c1ccc(c2)Nc1ccccc1)S(=O)(=O)O	7-anilino-4-hydroxynaphthalene-2-sulphonic acid	parent_chemical	315.35	organic	ionizable	4.5	4.5	0		4	0	Swater (EPI exp.)	4	B(QSAR)	4	B(QSAR) V(QSAR avg.)	0	(M2-3)	(P3-4)	(P3-4)	amph	amphoprotic	-	-	-	0.138769	0.745617	Avg. QSAR	5	0.138769	0.745617	4	3330	EPI exp.	5	48508.2	1.84354	6	4	B(QSAR)	-	-	-	1.69291e-11	QSAR avg.	2.03655e-16	QSAR avg.
p119-47-1	Cc1cc(Cc2cc(C)cc(c2O)C(C)(C)C)c(c(c1)C(C)(C)C)O	6,6'-di-tert-butyl-2,2'-methylenedi-p-cresol	parent_chemical	340.509	organic	ionizable	Immobile POC	Immobile POC	0.57735		1	0.57735	Swater (EPI exp.)	4	B(QSAR)	4	B(QSAR) V(QSAR avg.)	0	(M2-3)	(P3-4)	(P3-4)	A	11.2779	QSAR (SPARC)	-	-	3.57768		OECD exp	1	7.10975	0.492905	5	0.02	EPI exp.	2	0.744316	2.20268	8	4	B(QSAR)	-	-	-	1.86233e-07	QSAR avg.	2.71549e-08	QSAR avg.
p119-53-9	OC(C(=O)c1ccccc1)c1ccccc1	benzoin	parent_chemical	212.25	organic	neutral	1	1	0.866025		3	0.5	Swater (OECD & lit exp.)	2	B(QSAR)	2	B(QSAR)	0.707107	(M2-3)	(P1-2)	(P3-4)	N	N	-	-	-	2.13		OECD exp	3	2.43111	0.392782	5	300	OECD exp.	3	963.205	1.49683	8	2	B(QSAR)	-	-	-	0.000293	OECD exp.	8.36696e-08	OECD exp.
p119-56-2	Clc1ccc(cc1)C(c1ccccc1)O	4-chlorobenzhydryl alcohol	parent_chemical	218.684	organic	neutral	4	4	1		3	0.707107	Swater (EPI exp.)	3	B(QSAR)	3	B(QSAR)	0.707107	(M2-3)	(P3-4)	(P3-4)	N	N	-	-	-	3.46785	0.100434	Avg. QSAR	2	3.46785	0.100434	5	71	EPI exp.	3	60.1977	0.425477	8	3	B(QSAR)	-	-	-	0.00141774	QSAR avg.	8.33067e-07	QSAR avg.
p119-60-8	O=C(C1CCCCC1)C1CCCCC1	dicyclohexyl ketone	parent_chemical	194.319	organic	neutral	Transient	Transient	0		2	0	Swater (Avg. QSAR)	2	B(QSAR)	1	V(QSAR avg.)	0	(M2-3)	(P1-2)	(P1-2)	N	N	-	-	-	4.16765	0.244677	Avg. QSAR	2	4.16765	0.244677	5	38.2305	QSAR avg	2	38.2305	1.53927	8	2	B(QSAR)	-	-	-	0.886462	QSAR avg.	0.00292177	QSAR avg.
p119-61-9,h1013-88-3,h69555-14-2	O=C(c1ccccc1)c1ccccc1	benzophenone	hydrolysis_product,parent_chemical	182.223	organic	neutral	Transient	Transient	0.912871		2	0.57735	Doc (OECD & lit exp.)	2	B(QSAR)	2	B(QSAR)	0.707107	(M2-3)	(P3-4)	(P3-4)	N	N	-	3.056	OECD exp.	3.18	0	lit exp.	2	3.26065	0.122556	5	137	EPI exp.	3	63.4124	0.655258	8	2	B(QSAR)	-	-	-	0.257269	EPIwin Exp.	1.58489e-05	Lit exp.
p119-64-2	C1CCc2c(C1)cccc2	1,2,3,4-tetrahydronaphthalene	parent_chemical	132.207	organic	neutral	3	Transient	0.707107		2	0	Swater (EPI exp.)	3	B(QSAR)	1	V(OECD exp.) PT(exp.)	0.707107	(M2-3)	(P1-2)	(P3-4)	N	N	-	-	-	3.99		OECD exp	2	3.61574	0.243543	5	47	EPI exp.	2	45.2418	0.692892	8	3	B(QSAR)	-	-	1	58.3	OECD exp.	0.063063	OECD exp.
p119-65-3	c1ccc2c(c1)cncc2	isoquinoline	parent_chemical	129.162	organic	ionizable	2	Unstable MOC	0.912871		4	0.57735	Doc (OECD & lit exp.)	2	B(QSAR)	1	V(OECD exp.)	0.707107	(M2-3)	(P3-4)	(P3-4)	B	5.4	Exp (CRC)	1.84305	OECD exp.	1.45553	0.633686	Avg. QSAR	5	0.888751	0.414621	5	130594	OECD exp.	5	68368.1	1.07942	8	2	B(QSAR)	-	-	-	93.3	OECD exp.	0.000972795	OECD exp.
p119-70-0	Nc1ccc(cc1)Nc1ccc(cc1S(=O)(=O)O)N	5-amino-2-(p-aminoanilino)benzenesulphonic acid	parent_chemical	279.319	organic	ionizable	4	4	1		3	1	Swater (OECD & lit exp.)	4	B(QSAR)	4	B(QSAR) V(QSAR avg.)	0	(M4-5)	(P3-4)	(P3-4)	amph	amphoprotic	-	-	-	0.167		OECD exp	5	-1.68486	0.770785	4	450	OECD exp.	5	191324	2.07462	6	4	B(QSAR)	-	-	-	9.53095e-11	QSAR avg.	2.50684e-18	QSAR avg.
p119-79-9	Nc1cccc2c1ccc(c2)S(=O)(=O)O	5-aminonaphthalene-2-sulphonic acid	parent_chemical	223.252	organic	ionizable	4.5	4.5	0.912871		4	0.57735	Swater (OECD & lit exp.)	4	B(QSAR)	4	B(QSAR) V(QSAR avg.)	0.707107	(M2-3)	(P3-4)	(P3-4)	amph	amphoprotic	-	-	-	-1.03901	0.16474	Avg. QSAR	5	-1.03901	0.16474	4	1990	OECD exp.	5	191990	2.07056	6	4	B(QSAR)	-	-	-	7.01158e-08	QSAR avg.	3.54965e-12	QSAR avg.
p119-80-2	OC(=O)c1ccccc1SSc1ccccc1C(=O)O	2,2'-dithiodi(benzoic acid)	parent_chemical	306.361	organic	ionizable	Unstable MOC	Unstable MOC	0.57735		5	0.57735	Swater (Avg. QSAR)	1	B(exp)	1	B(exp)	0	(M4-5)	(P1-2)	(P1-2)	A	3.85077	QSAR (SPARC)	-	-	-4.53923		OECD exp	5	-1.72676	1.6487	5	1.84778e+07	QSAR avg	5	1.84778e+07	0.735108	8	1	B(exp)	3	OECD exp.	-	1.33e-07	OECD exp.	4.10423e-13	QSAR avg.
p120-00-3	CCOc1cc(N)c(cc1NC(=O)c1ccccc1)OCC	4'-amino-2',5'-diethoxybenzanilide	parent_chemical	300.36	organic	ionizable	4.5	4.5	1.08012		4	0.816497	Swater (OECD & lit exp.)	3	B(QSAR)	3	B(QSAR)	0.707107	(M2-3)	(P3-4)	(P3-4)	amph	amphoprotic	-	-	-	3.232		OECD exp	3	2.44962	0.149382	5	1180	OECD exp.	3	61.8877	0.787242	8	3	B(QSAR)	-	-	-	3.58087e-08	QSAR avg.	3.77402e-12	QSAR avg.
p120-12-7	c1ccc2c(c1)cc1c(c2)cccc1	anthracene	parent_chemical	178.235	organic	neutral	4	Transient	1.41421		2	0	Doc (PP-LFER)	4	B(QSAR)	1	V(Lit exp.)	1.41421	(M1)	(P3-4)	(P3-4)	N	N	-	3.60312	PP-LFER	4.4725	0.045	lit exp.	2	4.23624	0.430785	5	0.0434	EPI exp.	2	1.04719	0.279885	8	4	B(QSAR)	-	-	-	0.0008	OECD exp.	0.00108393	Lit exp.
p120-18-3	OS(=O)(=O)c1ccc2c(c1)cccc2	naphthalene-2-sulphonic acid	parent_chemical	208.237	organic	ionizable	Unstable MOC	Unstable MOC	0	exp	5	0	Doc (OECD & lit exp.)	1	B(exp)	1	B(exp)	0	(M2-3)	(P3-4)	(P3-4)	A	2	Exp (OECD)	-5.88	OECD exp.	-0.477678	0.69854	Avg. QSAR	5	-2.47768	3.72653	4	60000	EPI exp.	5	4.85803e+12	2.5473	5	1	B(exp)	-	-	-	1.00508e-05	QSAR avg.	1.00601e-08	QSAR avg.
p120-20-7	NCCc1ccc(c(c1)OC)OC	3,4-dimethoxyphenethylamine	parent_chemical	181.236	organic	ionizable	3	3	0.707107		5	0	Swater (Avg. QSAR)	2	B(QSAR)	2	B(QSAR)	0.707107	(M2-3)	(P3-4)	(P3-4)	B	10.452	QSAR (SPARC)	-	-	-0.200297	1.3723	Avg. QSAR	5	-2.78109	2.54003	5	3.29834e+11	QSAR avg	5	3.29834e+11	2.19264	8	2	B(QSAR)	-	-	-	0.249079	QSAR avg.	1.68019e-06	QSAR avg.
p120-35-4	COc1ccc(cc1N)C(=O)Nc1ccccc1	3-amino-4-methoxybenzanilide	parent_chemical	242.279	organic	ionizable	3	3	1.19024		2	0.957427	Swater (OECD & lit exp.)	3	B(QSAR)	3	B(QSAR)	0.707107	(M2-3)	(P3-4)	(P3-4)	amph	amphoprotic	-	-	-	2.08		OECD exp	4	1.95193	0.280396	5	33	OECD exp.	3	236.9	1.10264	8	3	B(QSAR)	-	-	-	1.51173e-06	QSAR avg.	1.65741e-10	QSAR avg.
p120-40-1	CCCCCCCCCCCC(=O)N(CCO)CCO	N,N-bis(2-hydroxyethyl)dodecanamide	parent_chemical	287.446	organic	neutral	Unstable MOC	Unstable MOC	0.707107		4	0.707107	Swater (Avg. QSAR)	1	B(QSAR)	1	B(QSAR)	0	(M2-3)	(P3-4)	(P3-4)	N	N	-	-	-	2.93729	0.217965	Avg. QSAR	3	2.93729	0.217965	5	1202.1	QSAR avg	4	1202.1	2.23358	8	1	B(QSAR)	-	-	-	0.0057595	OECD exp.	4.49112e-11	QSAR avg.
p120-46-7	O=C(c1ccccc1)CC(=O)c1ccccc1	1,3-diphenylpropane-1,3-dione	parent_chemical	224.261	organic	ionizable	2	2	0.707107		4	0.707107	Swater (Avg. QSAR)	2	B(QSAR)	2	B(QSAR)	0	(M2-3)	(P1-2)	(P1-2)	A	8.66204	QSAR (SPARC)	-	-	2.77147	0.3208	Avg. QSAR	3	2.22849	0.845237	5	3625.22	QSAR avg	4	3625.22	1.18385	8	2	B(QSAR)	-	-	-	0.00489698	QSAR avg.	2.57216e-07	QSAR avg.
p120-47-8	CCOC(=O)c1ccc(cc1)O	ethyl 4-hydroxybenzoate	parent_chemical	166.178	organic	ionizable	Transient	Transient	0	exp	3	0	Swater (EPI exp.)	1	B(exp)	1	B(exp)	0	(M2-3)	(P1-2)	(P1-2)	A	8.54	Exp (OECD (average))	-	-	0.995197		lit exp.	5	0.867135	0.209548	5	885	EPI exp.	5	90854.5	0.514973	8	1	B(exp)	4	Hydrowin	-	0.0721479	QSAR avg.	3.91421e-07	QSAR avg.
p120-51-4	O=C(c1ccccc1)OCc1ccccc1	benzyl benzoate	parent_chemical	212.25	organic	neutral	Transient	Transient	1.65831		2	1.5	Doc (OECD & lit exp.)	2	B(QSAR)	2	B(QSAR)	0.707107	(M2-3)	(P3-4)	(P3-4)	N	N	-	3.8	OECD exp.	3.55755	0.214962	Avg. QSAR	2	3.55755	0.214962	5	32.2561	QSAR avg	2	32.2561	0.525491	8	2	B(QSAR)	4	Hydrowin	-	0.030457	OECD exp.	8.94656e-05	QSAR avg.
p120-55-8	O=C(c1ccccc1)OCCOCCOC(=O)c1ccccc1	oxydiethylene dibenzoate	parent_chemical	314.34	organic	neutral	Transient	Transient	0.5	exp	2	0.5	Doc (OECD & lit exp.)	1	B(exp)	1	B(exp)	0	(M2-3)	(P3-4)	(P3-4)	N	N	-	3.2	OECD exp.	3.40803	0.399129	Avg. QSAR	2	3.40803	0.399129	5	38.3	OECD exp.	3	55.8043	1.12822	8	1	B(exp)	4	Hydrowin	-	1.8e-05	OECD exp.	5.96276e-08	OECD exp.
p120-57-0	O=Cc1ccc2c(c1)OCO2	piperonal	parent_chemical	150.135	organic	neutral	Unstable MOC	Unstable MOC	0.57735	exp	4	0.57735	Swater (OECD & lit exp.)	1	B(exp)	1	B(exp)	0	(M4-5)	(P3-4)	(P3-4)	N	N	-	-	-	1.20062	0.46826	Avg. QSAR	5	1.20062	0.46826	5	1400	OECD exp.	4	8595.98	1.37674	8	1	B(exp)	-	-	-	1.333	EPIwin Exp.	2.2901e-05	EPI exp.
p120-61-6	COC(=O)c1ccc(cc1)C(=O)OC	dimethyl terephthalate	parent_chemical	194.188	organic	neutral	Transient	Transient	1.1547		2	1.1547	Swater (OECD & lit exp.)	1	B(QSAR)	1	B(QSAR) V(EPI exp.) PT(exp.)	0	(M2-3)	(P1-2)	(P1-2)	N	N	-	-	-	1.76984	0.188529	Avg. QSAR	4	1.76984	0.188529	5	49.3	OECD exp.	4	2407.86	1.0046	8	1	B(QSAR)	4	Hydrowin	1	1.333	EPIwin Exp.	0.00547988	EPI exp.
p120-71-8,h6962-44-3	COc1ccc(cc1N)C	6-methoxy-m-toluidine	hydrolysis_product,parent_chemical	137.183	organic	ionizable	3	3	0.57735		5	0.57735	Swater (OECD & lit exp.)	2	B(QSAR)	2	B(QSAR)	0	(M2-3)	(P3-4)	(P3-4)	B	4.41987	QSAR (SPARC)	-	-	1.09015		OECD exp	5	0.791862	0.382511	5	10888.5	OECD exp.	5	18125.7	1.15197	8	2	B(QSAR)	4	OECD exp.	-	4.09537	QSAR avg.	3.01371e-05	QSAR avg.
p120-78-5	c1ccc2c(c1)sc(n2)SSc1nc2c(s1)cccc2	di(benzothiazol-2-yl) disulphide	parent_chemical	332.489	organic	neutral	4	4	0.816497		3	0.816497	Swater (OECD & lit exp.)	4	B(QSAR)	4	B(QSAR) V(OECD exp.)	0	(M1)	(P3-4)	(P3-4)	N	N	-	-	-	4.5		OECD exp	1	5.16406	0.792525	5	88	OECD exp.	2	2.21146	2.57256	8	4	B(QSAR)	-	-	-	0.000113567	OECD exp.	1.7319e-07	OECD exp.
p120-80-9	Oc1ccccc1O	pyrocatechol	parent_chemical	110.113	organic	ionizable	Unstable MOC	Unstable MOC	0.57735	exp	4	0.57735	Doc (OECD & lit exp.)	1	B(exp)	1	B(exp)	0	(M4-5)	(P1-2)	(P1-2)	A	9.23	Exp (OECD)	1.23188	OECD exp.	0.0652127	0.0404145	lit exp.	5	0.377744	0.345475	5	461000	EPI exp.	5	588834	1.2079	8	1	B(exp)	-	-	-	0.487878	EPIwin Exp.	4.90735e-08	EPI exp.
p120-82-1	Clc1ccc(c(c1)Cl)Cl	1,2,4-trichlorobenzene	parent_chemical	181.45	organic	neutral	4	Transient	0		2	0	Doc (PP-LFER)	4	B(QSAR)	1	V(Lit exp.)	0	(M2-3)	(P3-4)	(P3-4)	N	N	-	3.36092	PP-LFER	4.0175	0.0287228	lit exp.	2	3.89222	0.156042	5	49	EPI exp.	2	25.6709	0.52356	8	4	B(QSAR)	-	-	-	57	Lit. Exp.	0.151356	Lit exp.
p120-83-2,h26496-99-1	Clc1ccc(c(c1)Cl)O	2,4-dichlorophenol	hydrolysis_product,parent_chemical	163.004	organic	ionizable	5	3	0.5		5	0.5	Doc (PP-LFER)	3	B(QSAR)	2	V(OECD exp.)	0	(M2-3)	(P3-4)	(P3-4)	A	7.72178	QSAR (SPARC)	0.00913831	PP-LFER	0.779498	0	lit exp.	5	0.953494	0.724481	5	929032	OECD exp.	5	298859	1.3834	8	3	B(QSAR)	-	-	-	12.9925	OECD exp.	0.000175524	OECD exp.
p120-92-3	O=C1CCCC1	cyclopentanone	parent_chemical	84.1187	organic	neutral	Unstable MOC	Unstable MOC	0		5	0	Doc (PP-LFER)	1	B(exp)	1	B(exp) V(OECD exp.)	0	(M4-5)	(P1-2)	(P1-2)	N	N	-	0.04374	PP-LFER	0.38		lit exp.	5	0.729538	0.214939	5	301000	OECD exp.	5	48772.7	0.743294	8	1	B(exp)	-	-	-	1510	OECD exp.	0.000490763	OECD exp.
p120-93-4,h96-45-7	O=C1NCCN1	2-imidazolidone	hydrolysis_product,parent_chemical	86.0939	organic	neutral	Unstable MOC	Unstable MOC	0	exp	5	0	Doc (OECD & lit exp.)	1	B(exp)	1	B(exp)	0	(M4-5)	(P1-2)	(P1-2)	N	N	-	0.68	OECD exp.	-1.28579	0.896028	Avg. QSAR	5	-1.28579	0.896028	5	596000	OECD exp.	5	546275	1.20985	8	1	B(exp)	-	-	-	0.0031	OECD exp.	1.80743e-10	OECD exp.
p121-03-9	O=N(=O)c1ccc(c(c1)S(=O)(=O)O)C	4-nitrotoluene-2-sulphonic acid	parent_chemical	217.201	organic	ionizable	5	5	0		5	0	Swater (EPI exp.)	4	B(QSAR)	4	B(QSAR) V(QSAR avg.)	0	(M4-5)	(P3-4)	(P3-4)	A	0.8	Exp (OECD)	-	-	-0.889001	0.267254	Avg. QSAR	5	-3.189	4.54814	4	667000	EPI exp.	5	2.83113e+14	2.25796	6	4	B(QSAR)	-	-	-	0.0001	OECD exp.	4.49841e-10	QSAR avg.
p121-17-5	O=N(=O)c1cc(ccc1Cl)C(F)(F)F	4-chloro-α,α,α-trifluoro-3-nitrotoluene	parent_chemical	225.555	organic	neutral	4	Transient	0.707107		3	0.707107	Swater (Avg. QSAR)	4	B(QSAR) H(LHC QSAR)	1	V(QSAR avg.)	0	(M1)	(P3-4)	(P3-4)	N	N	-	-	-	3.24699	0.187803	Avg. QSAR	2	3.24699	0.187803	5	54.1016	QSAR avg	3	54.1016	1.43263	8	4	B(QSAR)	4	LHC QSAR	-	14.7502	QSAR avg.	0.00461218	QSAR avg.
p121-30-2	Nc1cc(Cl)c(cc1S(=O)(=O)N)S(=O)(=O)N	4-amino-6-chlorobenzene-1,3-disulphonamide	parent_chemical	285.729	organic	ionizable	5	5	0		5	0	Swater (Avg. QSAR)	4	B(QSAR)	4	B(QSAR) V(QSAR avg.)	0	(M4-5)	(P3-4)	(P3-4)	amph	amphoprotic	-	-	-	0.8808		OECD exp	5	-0.760546	1.00674	5	33883.2	QSAR avg	5	33883.2	1.70259	8	4	B(QSAR)	-	-	-	2.66484e-08	QSAR avg.	2.48666e-13	QSAR avg.
p121-32-4	CCOc1cc(C=O)ccc1O	3-ethoxy-4-hydroxybenzaldehyde	parent_chemical	166.178	organic	ionizable	Unstable MOC	Unstable MOC	0	exp	5	0	Doc (OECD & lit exp.)	1	B(exp)	1	B(exp)	0	(M4-5)	(P1-2)	(P1-2)	A	7.84917	QSAR (SPARC)	0.67211	OECD exp.	0.832001	0.899742	Avg. QSAR	5	-0.029555	0.620439	5	2820	EPI exp.	5	455035	0.559996	8	1	B(exp)	-	-	-	0.03	OECD exp.	4.23248e-07	QSAR avg.
p121-33-5,h134283-49-1	COc1cc(C=O)ccc1O	vanillin	hydrolysis_product,parent_chemical	152.151	organic	ionizable	Unstable MOC	Unstable MOC	0	exp	5	0	Doc (OECD & lit exp.)	1	B(exp)	1	B(exp)	0	(M4-5)	(P1-2)	(P1-2)	A	7.38	Exp (OECD)	0.816959	OECD exp.	0.39118	0.827934	Avg. QSAR	5	-0.657236	0.888318	5	11000	EPI exp.	5	2.42501e+06	0.576896	8	1	B(exp)	-	-	-	0.368	OECD exp.	8.79234e-08	EPI exp.
p121-43-7	COB(OC)OC	trimethyl borate	parent_chemical	103.914	organo_borate	neutral	3	3	0.707107		5	0	Swater (Avg. QSAR)	2	B(QSAR)	2	B(QSAR)	0.707107	(M4-5)	(P3-4)	(P3-4)	N	N	-	-	-	0.569371	1.65964	Avg. QSAR	5	0.569371	1.65964	4	418535	QSAR avg	5	418535	1.08859	6	2	B(QSAR)	-	-	-	1.81667	OECD exp.	-	-
p121-44-8	CCN(CC)CC	triethylamine	parent_chemical	101.193	organic	ionizable	Unstable MOC	Unstable MOC	0	exp	5	0	Doc (OECD & lit exp.)	1	B(exp)	1	B(exp) V(Lit exp.)	0	(M2-3)	(P3-4)	(P3-4)	B	10.75	Exp (CRC)	-4.72	OECD exp.	-5.345	0.0636396	lit exp.	5	-2.90108	2.18019	5	68600	EPI exp.	5	1.48903e+11	1.01	8	1	B(exp)	-	-	-	8706	OECD exp.	0.00436516	Lit exp.
[truncated: 9,164 more rows]
[truncated: 134 more columns]

## Sheet: SensitivityAnal_Dow_prioritized
***PMOC scores when prioritizing Kow/Dow data over SL, as described in eq 6 of the main text and the sensitivity analysis section****
[truncated: 10,227 more rows]
